# Supplementary material for: A New Probiotic Blend Facilitates Resolution of Inflammation in a Crohn’s Disease Mouse Model by Promoting Apoptosis in Mucosal Innate Immune Cells
Source: Preprints.org preprint supplement (doi:10.20944/preprints202410.0050.v1), 2024-10-01
Supplement: Supplementary file 1 [file supplementary]

## Sheet: P+A vs. C
Supplementary Figure S1. Significantly Different Pathways among groups.
PROBIOTICS + AMYLASE vs. CONTROL
Pathway description	Normalized enrichment score	Adjusted P Value	Targets
Apoptosis	3.0883	0.00176194	Diablo,Oma1,Dynll2,Gsdmd,Tradd,Clspn,Appl1,Bmf,Ticam1,Dnm1l,Opa1,Aven,Dsp,Add1,Apaf1,Birc2,Xiap,Bad,Bak1,Bax,Bcl2,Bcl2l1,Bid,Bcl2l11,Bmx,Casp3,Casp6,Casp7,Casp8,Casp9,Ctnnb1,Cd14,Cdh1,Cflar,Cycs,Dbnl,Dffa,Dsg2,Fadd,Ptk2,Fas,Fnta,Gzmb,H1f3,H1f0,Hmgb1,H1f1,Kpnb1,Kpna1,Lmna,Lmnb1,Ly96,Mapt,H1f2,Nmt1,Ocln,Prkcd,Pkp1,Plec,Septin4,Ppp3cc,Ppp3r1,Ripk1,Rock1,Satb1,Ywhab,Tjp1,Tjp2,Tlr4,Tnfrsf10b,Gsdme,Tra…
Intrinsic Pathway for Apoptosis	2.56377	0.00176194	Diablo,Dynll2,Gsdmd,Bmf,Aven,Apaf1,Xiap,Bad,Bak1,Bax,Bcl2,Bcl2l1,Bid,Bcl2l11,Casp3,Casp7,Casp8,Casp9,Cycs,Gzmb,Nmt1,Septin4,Ppp3cc,Ppp3r1,Ywhab,Gsdme,Ywhae,Ywhag,Ywhah,Ywhaq,Ywhaz,Sfn,Apip,Dynll1,Pmaip1,Mapk1,Mapk3,Mapk8
Platelet degranulation	3.09497	0.00176194	Nhlrc2,Ola1,Cdc37l1,Tmx3,Chid1,Apool,Mmrn1,Qsox1,Rarres2,Endod1,Cyb5r1,Brpf3,Ly6g6f,Serpina3f,Spp2,Abcc4,Sccpdh,Pcyox1l,Actn1,Actg1,Aldoa,Anxa5,Aplp2,Apoa1,Apoh,App,Serping1,Calm1,Calm2,Calm3,Cd36,Cd63,Cd9,Clu,Ctsw,Lefty1,Ecm1,Fn1,Gas6,Rab27b,Hgf,Maged2,Igf1,Igf2,Itga2b,Itgb3,Lamp2,Orm1,Orm2,Pdgfa,Pdgfb,Pecam1,Lgals3bp,Srgn,Pros1,Psap,Tmsb4x,A1bg,Selp,Selenop,Sod1,Sparc,Serpina3g,Stxbp2,Pcdh7,Tex…
Downstream signaling events of B Cell Receptor (BCR)	2.95347	0.00176194	Psmd6,Psmd12,Psmd5,Psmc6,Psmd9,Psmd11,Psmd1,Psme4,Fbxw11,Psmb11,Card11,Rasgrp3,Malt1,Bcl10,Calm1,Calm2,Calm3,Rps27a,Fkbp1a,Hras,Ikbkb,Ikbkg,Kras,Psmb9,Psmb8,Psmd7,Nfatc2,Nfkb1,Nfkbia,Nfkbib,Ppp3ca,Ppp3cb,Ppp3r1,Psma2,Psma3,Psmb1,Psmb10,Psmb4,Psmb5,Psmb6,Psmb7,Psmc1,Psmc2,Psmc3,Psmc5,Psmd4,Psme1,Psme2,Psme3,Rela,Psmd10,Skp1,Psmd2,Psmd3,Uba52,Ubb,Psmc4,Psmd13,Psmd8,Psmd14,Psma1,Psma4,Psma5,Psma6,Ps…
Activation of NF-kappaB in B cells	2.78314	0.00176194	Psmd6,Psmd12,Psmd5,Psmc6,Psmd9,Psmd11,Psmd1,Psme4,Fbxw11,Psmb11,Card11,Malt1,Bcl10,Rps27a,Ikbkb,Ikbkg,Psmb9,Psmb8,Psmd7,Nfkb1,Nfkbia,Nfkbib,Psma2,Psma3,Psmb1,Psmb10,Psmb4,Psmb5,Psmb6,Psmb7,Psmc1,Psmc2,Psmc3,Psmc5,Psmd4,Psme1,Psme2,Psme3,Rela,Psmd10,Skp1,Psmd2,Psmd3,Uba52,Ubb,Psmc4,Psmd13,Psmd8,Psmd14,Psma1,Psma4,Psma5,Psma6,Psma7,Psmb2,Psmb3,Cul1,Psmf1
Cellular response to hypoxia	2.74999	0.00176194	Ube2d3,Psmd6,Ep300,Psmd12,Psmd5,Psmc6,Psmd9,Elob,Eloc,Wtip,Psmd11,Psmd1,Psme4,Cul2,Psmb11,Arnt,Rps27a,Epas1,Egln1,Egln3,Egln2,Hif1a,Psmb9,Psmb8,Psmd7,Cited2,Psma2,Psma3,Psmb1,Psmb10,Psmb4,Psmb5,Psmb6,Psmb7,Psmc1,Psmc2,Psmc3,Psmc5,Psmd4,Psme1,Psme2,Psme3,Ube2d1,Psmd10,Hif3a,Psmd2,Psmd3,Uba52,Ubb,Vhl,Rbx1,Ube2d2a,Psmc4,Psmd13,Psmd8,Hif1an,Psmd14,Psma1,Psma4,Psma5,Psma6,Psma7,Psmb2,Psmb3,Limd1,Psmf1
Antigen processing-Cross presentation	2.73728	0.00176194	Psmd6,Psmd12,Psmd5,Psmc6,Psmd9,Psmd11,Psmd1,Psme4,Psmb11,Lnpep,B2m,H2-Q6,Calr,Cd36,Gm8909,Cyba,Cybb,Fcgr1,Pdia3,H2-K1,H2-M3,H2-M9,H2-Q1,H2-Q10,H2-T23,H2-T24,Itgav,Itgb5,Psmb9,Psmb8,Psmd7,Mrc1,Mrc2,Ncf1,Ncf2,Psma2,Psma3,Psmb1,Psmb10,Psmb4,Psmb5,Psmb6,Psmb7,Psmc1,Psmc2,Psmc3,Psmc5,Psmd4,Psme1,Psme2,Psme3,Sec22b,Psmd10,Snap23,Stx4a,Tap1,Tap2,Tapbp,Psmd2,Psmd3,Vamp3,Vamp8,Psmc4,Psmd13,Psmd8,Psmd14,Ps…
PIP3 activates AKT signaling	2.3725	0.00176194	Phlpp1,Frs2,Gatad2b,Lamtor4,Psmd6,Lamtor1,Sall4,Wwp2,Psmd12,Psmd5,Psmc6,Psmd9,Akt1s1,Foxo6,Rnf146,Rraga,Lamtor5,Maf1,Psmd11,Irak4,Psmd1,Gatad2a,Psme4,Epgn,Slc38a9,Strn,Otud3,Hdac1,Psmb11,Tnks2,Pik3cb,Chd4,Pip4k2b,Them4,Prr5,Prex2,Il33,Akt1,Akt2,Xiap,Areg,Bmi1,Casp9,Cbx4,Cd86,Phc3,Cdkn1a,Cdkn1b,Rps27a,Creb1,Csnk2a1,Csnk2a2,Csnk2b,Rictor,Phc1,Eed,Egfr,Erbb2,Ereg,Mecom,Ezh2,Fgf15,Fgf2,Fgf7,Fgf9,Fgfr…
The citric acid (TCA) cycle and respiratory electron transport	5.21526	0.00176194	D2hgdh,Atp5d,Ndufb5,Sdhc,Ndufa3,Ndufa9,Cox7b,Uqcr10,Ndufb9,Ndufb6,Cox20,Ndufc1,Cox14,Ndufa12,Ndufa7,Cyc1,Ndufb3,Uqcrh,Tmem186,Uqcrfs1,Ndufaf3,Etfdh,Ndufb7,Sdhd,Sdha,Uqcrc2,Atp5e,Ndufa6,Ndufa13,Ndufb8,Ndufa10,Cox18,Sdhb,Idh3a,Coq10b,Atp5g2,Cox19,Dmac2l,Ndufb4,Ndufc2,Ndufb2,Ndufa5,Pdhb,Ndufb10,Ndufs3,Ndufa8,Tmem126b,Ndufaf4,Fahd1,Ndufaf5,Ndufaf1,Cox11,Taco1,Ndufab1,Ndufs5,Ndufb11,Dlat,Atp5h,Idh3b,L…
Collagen degradation	2.74181	0.00176194	Phykpl,Col6a5,Col11a2,Col12a1,Col13a1,Col15a1,Col18a1,Col3a1,Col4a1,Col4a2,Col5a1,Col5a2,Col6a1,Col6a2,Col1a1,Col1a2,Ctsb,Ctsd,Ctsk,Ctsl,Mmp11,Mmp13,Mmp14,Mmp15,Mmp2,Mmp3,Mmp8,Mmp9,Col5a3
Degradation of the extracellular matrix	2.96077	0.00176194	Ctrb1,Capn11,Optc,Spock3,Phykpl,Capn9,Col6a5,Mmp25,Adam10,Adam15,Adam8,Bmp1,Bsg,Capn1,Capn2,Capns1,Capn5,Capn7,Cast,Cd44,Cdh1,Col11a2,Col12a1,Col13a1,Col15a1,Col18a1,Col3a1,Col4a1,Col4a2,Col5a1,Col5a2,Col6a1,Col6a2,Col1a1,Col1a2,Ctsb,Ctsd,Ctsk,Ctsl,Ctss,Dcn,Eln,Fbn1,Fn1,Hspg2,Klk1b26,Lama3,Lamb3,Cma1,Mmp11,Mmp13,Mmp14,Mmp15,Mmp16,Mmp2,Mmp3,Mmp8,Mmp9,Capn15,Nid1,Furin,Capn13,Col5a3,Htra1,Adamts5,C…
Extracellular matrix organization	2.7818	0.00176194	Ctrb1,Mfap1a,Loxl4,Emilin1,Pxdn,Colgalt1,Itga9,Capn11,Ltbp1,Optc,Colgalt2,Spock3,Phykpl,Capn9,Col23a1,Col16a1,Col26a1,Col6a5,Ltbp4,Mmp25,Mfap4,Pcolce2,Itga1,Adam10,Adam12,Adam15,Adam19,Adam8,App,Itga8,Bgn,Bmp1,Bmp2,Bmp4,Bmp7,Bsg,Ddr1,Capn1,Capn2,Capns1,Capn5,Capn7,Cast,Serpinh1,Cd151,Cd44,Cdh1,Col11a2,Col12a1,Col13a1,Col14a1,Col15a1,Col18a1,Col3a1,Col4a1,Col4a2,Col5a1,Col5a2,Col6a1,Col6a2,Col1a1,…
L13a-mediated translational silencing of Ceruloplasmin expression	6.19481	0.00176194	Eif3f,Rpl3l,Rps23,Rps21,Rpl15,Rpl36al,Rpl35,Rpl11,Rps10,Rpl14,Rplp2,Eif2s2,Rpl37,Rps20,Rpl38,Rpl4,Rps27l,Rpl22l1,Rps13,Eif3h,Rpl39l,Rpl24,Rpl34,Rps15a,Rpl5,Rpl23a,Rpl12,Rpl13,Eif3k,Rps25,Eif4b,Rpl18a,Rps9,Rplp0,Eif4g1,Rpl10,Eif3j1,Eif2s1,Eif3a,Eif4a1,Eif4a2,Eif4e,Rpl31,Eif3e,Rpsa,Rps2,Pabpc1,Rpl18,Rpl19,Rpl22,Rpl26,Rpl27,Rpl28,Rpl29,Rpl37a,Rpl36a,Rpl6,Rpl7,Rpl9,Rps14,Rps15,Rps16,Rps17,Rps18,Rps19…
Mitochondrial biogenesis	3.81234	0.00176194	Atp5d,Atp5e,Atp5g2,Dmac2l,Sirt5,Atp5h,Idh2,Sirt4,Atp5a1,Atp5b,Atp5c1,Atp5pb,Atp5g1,Atp5j,Atp5k,Cycs,Gabpa,Gabpb1,Glud1,Sod2,Atp5j2,Atp5l,Acss2,Atp5o,Atp5g3,Sirt3
Respiratory electron transport, ATP synthesis by chemiosmotic coupling, and heat production by uncoupling proteins.	4.92494	0.00176194	Atp5d,Ndufb5,Ndufa3,Ndufa9,Cox7b,Uqcr10,Ndufb9,Ndufb6,Cox20,Ndufc1,Cox14,Ndufa12,Ndufa7,Cyc1,Ndufb3,Uqcrh,Tmem186,Uqcrfs1,Ndufaf3,Etfdh,Ndufb7,Uqcrc2,Atp5e,Ndufa6,Ndufa13,Ndufb8,Ndufa10,Cox18,Coq10b,Atp5g2,Cox19,Dmac2l,Ndufb4,Ndufc2,Ndufb2,Ndufa5,Ndufb10,Ndufs3,Ndufa8,Tmem126b,Ndufaf4,Ndufaf5,Ndufaf1,Cox11,Taco1,Ndufab1,Ndufs5,Ndufb11,Atp5h,Lrpprc,Ndufv2,Ndufaf7,Ndufs7,Ndufaf2,Timmdc1,Ndufaf6,Atp…
Formation of ATP by chemiosmotic coupling	3.68817	0.00176194	Atp5d,Atp5e,Atp5g2,Dmac2l,Atp5h,Atp5a1,Atp5b,Atp5c1,Atp5pb,Atp5g1,Atp5j,Atp5k,Atp5j2,Atp5l,Atp5o,Atp5g3
Macroautophagy	2.54707	0.00176194	Lamtor4,Tomm6,Tomm7,Chmp4c,Lamtor1,Ube2v1,Atg4b,Chmp3,Map1lc3a,Atg10,Wdr45b,Mfn1,Map1lc3b,Atg12,Atg3,Tubb6,Tomm20,Usp30,Dynll2,Atg101,Arl13b,Rraga,Tomm5,Lamtor5,Pink1,Chmp2b,Chmp2a,Atg14,Dync1li2,Atg4d,Dync1li1,Fundc1,Slc38a9,Mfn2,Pgam5,Chmp7,Prkaa1,Tubb2b,Atg7,Mtmr3,Tubal3,Wipi2,Prkaa2,Prkag2,Chmp4b,Pik3r4,Atg4a,Chmp6,Atg16l1,Atg5,Atm,Rb1cc1,Cftr,Rps27a,Csnk2a1,Csnk2a2,Csnk2b,Uvrag,Atg4c,Dync1h1…
Autodegradation of Cdh1 by Cdh1:APC/C	2.832	0.00176194	Anapc11,Anapc2,Psmd6,Cdc26,Psmd12,Psmd5,Psmc6,Psmd9,Ube2c,Anapc10,Psmd11,Cdc16,Psmd1,Anapc15,Ube2s,Rps27a,Psmb9,Psmb8,Anapc1,Psmd7,Psma2,Psma3,Psmb1,Psmb10,Psmb4,Psmb5,Psmb6,Psmb7,Psmc1,Psmc2,Psmc3,Psmc5,Psmd4,Psme1,Psme2,Psme3,Anapc4,Ube2d1,Cdc23,Anapc16,Psmd10,Cdc27,Psmd2,Psmd3,Uba52,Ubb,Ube2e1,Anapc7,Fzr1,Psmc4,Psmd13,Psmd8,Anapc5,Psmd14,Psma1,Psma4,Psma5,Psma6,Psma7,Psmb2,Psmb3,Psmf1
Plasma lipoprotein assembly, remodeling, and clearance	2.96599	0.00176194	Sar1b,Ldlrap1,Cltc,Pcsk9,Npc2,Ap2s1,Ap2b1,Lmf2,Apob,Lmf1,Abca1,Abcg1,Apoc4,Ap2a1,Ap2a2,Ap2m1,Apoa1,Apoa4,Apoc1,Apoc2,Apoc3,Apoe,Bmp1,Hdlbp,Ldlr,Lipa,Mttp,Npc1,P4hb,Furin,Pcsk5,Pcsk6,Prkaca,Prkacb,Pltp,Soat1,Scarb1,Mylip,Nr1h3,Nr1h2,Angptl4,Nceh1,Soat2,Zdhhc8
SRP-dependent cotranslational protein targeting to membrane	5.6456	0.00176194	Rpl3l,Rps23,Rps21,Rpl15,Rpl36al,Rpl35,Srp72,Rpl11,Rps10,Rpl14,Rplp2,Rpl37,Rps20,Rpl38,Rpl4,Rps27l,Rpl22l1,Rps13,Rpl39l,Rpl24,Rpl34,Rps15a,Rpl5,Rpl23a,Rpl12,Rpl13,Rps25,Rpl18a,Rps9,Rplp0,Rpl10,Rpl31,Rpsa,Rps2,Rpl18,Rpl19,Rpl22,Rpl26,Rpl27,Rpl28,Rpl29,Rpl37a,Rpl36a,Rpl6,Rpl7,Rpl9,Rps14,Rps15,Rps16,Rps17,Rps18,Rps19,Rps24,Rps29,Rps3a1,Rps4x,Rps5,Rps6,Rps7,Rps8,Srp68,Srp14,Rps28,Rpl13a,Uba52,Rplp1,Sr…
Organelle biogenesis and maintenance	2.04409	0.00176194	Atp5d,Cep152,Exoc2,Haus6,Ift27,Dynlrb1,Atp5e,Sclt1,Nde1,Dynlt2a3,Haus3,Ift22,Tctn3,Ift172,Ift74,Atp5g2,Tubb6,Tctn2,Dmac2l,Dynll2,Arl13b,Akap9,Ift80,Sirt5,Ssna1,Tmem216,Ccp110,Mark4,B9d2,Exoc8,Dctn2,Exoc1,Cep192,Tubg1,Bbip1,Cngb1,Bbs7,Csnk1d,Atp5h,Haus5,Cep89,Ttc30b,Alms1,Bbs5,Exoc5,Hspb11,Atat1,Idh2,Ofd1,Ttc21b,Tubb2b,Haus7,Ift140,Ift57,Traf3ip1,Nphp3,Unc119b,Cep97,Cep57,Cep72,Gbf1,Tubal3,Tnpo1,T…
Signaling by VEGF	2.74414	0.00176194	Shb,Abi2,Dock1,Brk1,Mapkapk3,Nckap1l,Pik3cb,Elmo2,Elmo1,Baiap2,Them4,Prr5,Abi1,Cyfip2,Actb,Actg1,Akt1,Akt2,Rhoa,Calm1,Calm2,Calm3,Ctnna1,Ctnnb1,Ctnnd1,Cav1,Cdc42,Cdh5,Bcar1,Crk,Cyba,Cybb,Rictor,Wasf2,Ptk2,Flt1,Flt4,Fyn,Hras,Hspb1,Hsp90aa1,Itgav,Itgb3,Jup,Kdr,Kras,Mapkapk2,Ncf1,Ncf2,Nck1,Nck2,Nckap1,Nos3,Nrp1,Nrp2,Pdpk1,Pgf,Pik3ca,Pik3r1,Pik3r2,Prkaca,Prkacb,Prkca,Prkcd,Prkcz,Plcg1,Ptk2b,Pxn,Rac1,…
Signaling by WNT	2.55484	0.00176194	Gng11,Smurf2,Psmd6,Ep300,Psmd12,Psmd5,Ctnnbip1,Psmc6,Psmd9,Cltc,Chd8,Rnf146,Wls,Pygo2,Ap2s1,Psmd11,Psmd1,Psme4,Xpo1,Leo1,Ap2b1,Amer1,Rac3,Rspo3,Tmed5,Hdac1,Cby1,Psmb11,Cltb,Tnks2,Rspo2,Smurf1,Rnf43,Klhl12,Akt1,Akt2,Ap2a1,Ap2a2,Ap2m1,Xiap,Rhoa,Axin1,Axin2,Bcl9,Daam1,Calm1,Calm2,Calm3,Ctnnb1,Cav1,Rps27a,Csnk2a1,Csnk2a2,Csnk2b,Ctbp1,Ctbp2,Dkk1,Dvl1,Dvl2,Dvl3,Lgr5,Frat1,Fzd1,Fzd4,Fzd5,Fzd6,Fzd8,Znrf3…
ER to Golgi Anterograde Transport	3.45384	0.00176194	0610009B22Rik,Tmed3,Trappc2,Arfgap3,Sar1b,Golga2,Tmed7,Trappc5,Lman2,Kdelr2,Sec24b,Trappc6a,Tbc1d20,Tmed9,Cog6,Dctn4,Stx17,Ppp6c,Tubb6,Dynll2,Kdelr1,Tmed10,Sec31a,Cog4,Sec24d,Dctn2,Cog7,Copb1,Lman1,Dync1li2,Csnk1d,Dync1li1,Ankrd28,Cnih3,Kdelr3,Tubb2b,Cog5,Gorasp1,Gbf1,Tubal3,Napg,Napa,Mia3,Rab1b,Cog2,Trappc9,Scfd1,Arfgap2,Sec24a,Areg,Arf1,Arf3,Arf4,Arf5,Bet1,Sec13,Capza2,Capzb,Trappc6b,Cnih1,Copa…
trans-Golgi Network Vesicle Budding	3.49266	0.00176194	Snx9,Cltc,Ap4b1,Necap1,Gak,Snx2,Chmp2a,Bloc1s3,Snx5,Picalm,Acbd3,Txndc5,Cltb,Gbf1,Ap4e1,Ap1s2,Napa,Gns,Arrb1,Ap1b1,Ap1g1,Ap1g2,Ap1m1,Ap1m2,Ap1s1,Ap3b1,Ap3s1,Ap4m1,Ap4s1,App,Arf1,Yipf6,Cpd,Dnase2a,Dnm2,Fth1,Bloc1s1,Hgs,Pum1,Hspa8,Igf2r,Tbc1d8b,M6pr,Bloc1s6,Pik3c2a,Bloc1s4,Rab5c,Sh3gl2,Snapin,Snap23,Sort1,Stx4a,Tpd52,Tfrc,Tgoln1,Vamp2,Vamp8,Ap1s3,Ocrl,Sh3d19,Golgb1,Dtnbp1,Hip1r,Ctsz
Assembly of collagen fibrils and other multimeric structures	2.79441	0.00176194	Loxl4,Pxdn,Col6a5,Bmp1,Cd151,Col11a2,Col12a1,Col14a1,Col15a1,Col18a1,Col3a1,Col4a1,Col4a2,Col5a1,Col5a2,Col6a1,Col6a2,Col1a1,Col1a2,Ctsb,Ctsl,Ctss,Col27a1,Itga6,Lama3,Lamb3,Loxl1,Mmp13,Mmp3,Mmp9,Pcolce,Plec,Col5a3,Tll2,Loxl2,Itgb4
Downstream TCR signaling	2.62746	0.00176194	Psmd6,Ube2v1,Psmd12,Psmd5,Psmc6,Psmd9,Tab2,Psmd11,Psmd1,Psme4,Fbxw11,Psmb11,Pik3cb,Card11,Malt1,Bcl10,Cd3e,Cd3g,Cd247,Rps27a,Ikbkb,Ikbkg,Inpp5d,Lck,Psmb9,Psmb8,Psmd7,Nfkb1,Nfkbia,Pdpk1,Pik3ca,Pik3r1,Pik3r2,Psma2,Psma3,Psmb1,Psmb10,Psmb4,Psmb5,Psmb6,Psmb7,Psmc1,Psmc2,Psmc3,Psmc5,Psmd4,Psme1,Psme2,Psme3,Pten,Ube2d1,Cdc34,Rela,Psmd10,Skp1,Psmd2,Traf6,Psmd3,Uba52,Ubb,Ube2d2a,Psmc4,Psmd13,Psmd8,Psmd14…
Cell surface interactions at the vascular wall	2.81321	0.00176194	Ppil2,Slc7a6,Cd177,Esam,Ppia,Jaml,Apob,Pik3cb,Olr1,Angpt2,Atp1b1,Atp1b2,Atp1b3,Bsg,Cav1,Cd44,Cd48,Cd84,Col1a1,Col1a2,Cxadr,Dok2,Fcer1g,Fn1,Fyn,Gas6,Gpc1,Grb2,Grb7,Ptpn6,Slc16a3,Hras,Sdc2,Jchain,Cd74,Inpp5d,Itga3,Itga4,Itga5,Itga6,Itgav,Itgax,Itgb1,Itgb2,Itgb3,Cd47,F11r,Kras,Lck,Epcam,Lyn,Slc3a2,Mertk,Mif,Cd244a,Slc7a8,Jam3,Pecam1,Pik3ca,Pik3r1,Pik3r2,Plcg1,Proc,Procr,Pros1,Ptpn11,Sirpa,Sele,Glg1,…
Fcgamma receptor (FCGR) dependent phagocytosis	2.7799	0.00176194	Actr2,Abi2,Arpc5,Arpc4,Dock1,Wipf2,Brk1,Plcg2,Plpp5,Pld4,Nckap1l,Wasl,Actr3,Pik3cb,Elmo2,Elmo1,Baiap2,Arpc2,Abi1,Cyfip2,Abl1,Actb,Actg1,Arpc1b,Btk,Cd3g,Cd247,Cdc42,Crk,Wasf2,Ptk2,Fcgr1,Fcgr2b,Fgr,Fyn,Grb2,Hck,Nckipsd,Hsp90ab1,Hsp90aa1,Fcgr4,Limk1,Lyn,Myh9,Myo10,Myo1c,Myo5a,Nck1,Nf2,Nckap1,Wipf1,Pik3ca,Pik3r1,Pik3r2,Prkcd,Prkce,Plcg1,Pld2,Pld3,Rac1,Cyfip1,Pla2g6,Src,Syk,Vav1,Vav2,Was,Yes1,Arpc3,Ar…
Regulation of actin dynamics for phagocytic cup formation	3.15388	0.00176194	Actr2,Abi2,Arpc5,Arpc4,Dock1,Wipf2,Brk1,Nckap1l,Wasl,Actr3,Elmo2,Elmo1,Baiap2,Arpc2,Abi1,Cyfip2,Abl1,Actb,Actg1,Arpc1b,Btk,Cd3g,Cd247,Cdc42,Crk,Wasf2,Ptk2,Fcgr1,Fcgr2b,Grb2,Nckipsd,Hsp90ab1,Hsp90aa1,Fcgr4,Limk1,Myh9,Myo10,Myo1c,Myo5a,Nck1,Nf2,Nckap1,Wipf1,Rac1,Cyfip1,Syk,Vav1,Vav2,Was,Arpc3,Arpc1a,Mapk1,Mapk3
Biological oxidations	2.26985	0.00176194	Cndp2,Cyb5b,Mgst3,Ugt1a1,Ugt1a7c,Ugt1a5,Cyp4a29,Mtarc2,Trmt112,Aadac,N6amt1,Ugt2b34,Bphl,Chac2,Fdx2,Mat2a,Gstm7,Cyp26b1,Acss1,Chac1,Sult1c2,Cyp4v3,Cmbl,Cyp2c66,Cyp27a1,Cyp2u1,Ggt6,Acy3,Cyp4f18,Cyp2c55,Aldh1b1,Ahcy,Aoc2,Cyp2s1,Cyp4f40,Mtr,Glyatl3,Cyp4a30b,Oplah,Ces2h,Mat2b,Slc35b3,Gstk1,Acy1,Maob,Cyb5r3,Adh1,Adh7,Adh5,Cbr3,Ahr,Aip,Aldh1a1,Aldh2,Aoc3,Cyp11b1,Arnt,Ggct,Akr7a5,Comt,Bpnt2,Cyp11a1,Cyp1…
PRC2 methylates histones and DNA	3.38319	0.00176194	H4c17,H2aj,H4c8,Aebp2,H2az2,Dnmt1,Dnmt3a,Eed,Ezh2,H3f3a,H3f3b,H2ac18,H2ax,Rbbp7,Jarid2,Mtf2,H2az1,Rbbp4,Suz12,Phf1,H3c2,H4c11,H2ac10,H2bc11,H2bc3,H2bc21,H4c14,H3c1
MHC class II antigen presentation	3.52831	0.00176194	Ctso,Ifi30,Cenpe,Sar1b,Sec24b,Cltc,Dctn4,Tubb6,Dynll2,Ap2s1,Sec31a,Sec24d,Dctn2,Dync1li2,Ap2b1,Kif23,Dync1li1,Tubb2b,Kif2c,Tubal3,Klc4,Ap1s2,Kif22,Ap1b1,Ap1g1,Ap1m1,Ap1m2,Ap1s1,Ap2a1,Ap2a2,Ap2m1,Sec24a,Arf1,Sec13,Canx,Capza2,Capzb,Kif26a,Ctsb,Ctsc,Ctsd,Ctse,Ctsh,Ctsk,Ctsl,Ctss,Kif15,Dctn1,Dync1h1,Dync1i2,Dnm1,Dnm2,H2-DMb2,H2-Oa,Cd74,Kif11,Kif2a,Kif3a,Kif3b,Kif3c,Kif5b,Kifap3,Lag3,Rilp,Ctsa,Lgmn,K…
Integrin cell surface interactions	3.24927	0.00176194	Itga9,Col16a1,Col6a5,Itga1,Itga8,Bsg,Cd44,Cdh1,Col13a1,Col18a1,Col3a1,Col4a1,Col4a2,Col5a1,Col5a2,Col6a1,Col6a2,Col1a1,Col1a2,Fbn1,Fn1,Hspg2,Icam1,Icam2,Itga2,Itga2b,Itga3,Itga4,Itga5,Itga6,Itgae,Itgav,Itgax,Itgb1,Itgb2,Itgb3,Itgb5,Itgb6,Itgb7,Cd47,F11r,Kdr,Lum,Jam3,Pecam1,Col5a3,Tnc,Vwf
Binding and Uptake of Ligands by Scavenger Receptors	2.8496	0.00176194	Apol11a,Apol9b,Apob,Apol8,Apol7a,Apol7c,Apoa1,Apoe,Calr,Cd36,Apol10a,Jchain,Lrp1,Marco,Msr1,Sparc,Scarb1,Hsp90b1,Apol9a,Stab2
Fc epsilon receptor (FCERI) signaling	2.85645	0.00176194	Psmd6,Tab1,Ube2v1,Psmd12,Psmd5,Psmc6,Psmd9,Tab2,Psmd11,Psmd1,Psme4,Fbxw11,Plcg2,Psmb11,Pik3cb,Card11,Malt1,Bcl10,Btk,Calm1,Calm2,Calm3,Rps27a,Fcer1g,Fos,Grb2,Hras,Ikbkb,Ikbkg,Itk,Jun,Kras,Lat,Lcp2,Psmb9,Psmb8,Lyn,Grap2,Psmd7,Nfatc2,Nfkb1,Nfkbia,Pdpk1,Pik3ca,Pik3r1,Pik3r2,Plcg1,Ppp3ca,Ppp3cb,Ppp3r1,Psma2,Psma3,Psmb1,Psmb10,Psmb4,Psmb5,Psmb6,Psmb7,Psmc1,Psmc2,Psmc3,Psmc5,Psmd4,Psme1,Psme2,Psme3,Rac…
Oxidative Stress Induced Senescence	3.23563	0.00176194	H4c17,H2aj,H4c8,Mapkapk3,Tnik,H2az2,Bmi1,Cbx4,Phc3,Cdk4,Cdk6,Cdkn2b,Rps27a,Phc1,Eed,Ezh2,Fos,H3f3a,H3f3b,H2ac18,H2ax,Rbbp7,Jun,Mapkapk2,Mapkapk5,Mdm2,Mdm4,Mink1,H2az1,Rbbp4,Ring1,Rnf2,Suz12,Kdm6b,Phc2,Trp53,Txn1,Uba52,Ubb,H3c2,H4c11,H2ac10,H2bc11,H2bc3,H2bc21,Map2k3,Map2k4,Map2k6,Map2k7,Map3k5,Mapk1,Mapk10,Mapk14,Mapk3,Mapk8,Mapk9,Map4k4,Scmh1,Cbx8,H4c14,H3c1
Senescence-Associated Secretory Phenotype (SASP)	3.45668	0.00176194	Anapc11,Anapc2,Cdc26,H4c17,H2aj,Ube2c,Anapc10,H4c8,Cdc16,Anapc15,Ehmt2,H2az2,Ehmt1,Ube2s,Cdk2,Cdk4,Cdk6,Cdkn1a,Cdkn1b,Cdkn2b,Cebpb,Rps27a,H3f3a,H3f3b,H2ac18,H2ax,Anapc1,H2az1,Anapc4,Ube2d1,Cdc23,Anapc16,Cdc27,Uba52,Ubb,Ube2e1,Anapc7,Fzr1,H3c2,H4c11,H2ac10,H2bc11,H2bc3,H2bc21,Anapc5,Mapk1,Mapk3,H4c14,H3c1
Cellular Senescence	3.08071	0.00176194	Anapc11,Anapc2,Asf1a,Cdc26,H4c17,Pot1a,H2aj,Ube2c,Anapc10,H4c8,Mapkapk3,Cdc16,Cabin1,Acd,Ubn1,Tnik,Anapc15,Ep400,Ehmt2,Atm,H2az2,Ehmt1,Bmi1,Ube2s,Cbx4,Ccne1,Ccne2,Phc3,Cdk2,Cdk4,Cdk6,Cdkn1a,Cdkn1b,Cdkn2b,Cebpb,Rps27a,Phc1,Eed,Erf,Ezh2,Fos,H1f3,H1f0,H3f3a,H3f3b,Hira,H2ac18,H2ax,H1f1,Hmga1,Hmga2,Kat5,Rbbp7,Jun,Lmnb1,Mapkapk2,Mapkapk5,Anapc1,Mdm2,Mdm4,Mre11a,H1f2,Mink1,H2az1,Anapc4,Ube2d1,Rb1,Rbbp4,…
DNA Damage/Telomere Stress Induced Senescence	2.62187	0.00176194	Asf1a,H4c17,Pot1a,H2aj,H4c8,Cabin1,Acd,Ubn1,Ep400,Atm,H2az2,Ccne1,Ccne2,Cdk2,Cdkn1a,Cdkn1b,H1f3,H1f0,Hira,H2ac18,H2ax,H1f1,Hmga1,Hmga2,Kat5,Lmnb1,Mre11a,H1f2,H2az1,Rb1,Terf1,Terf2,Trp53,H1f5,H4c11,H2ac10,H2bc11,H2bc3,H2bc21,Terf2ip,Nbn,H4c14
EPH-Ephrin signaling	2.82998	0.00176194	Psenen,Actr2,Arpc5,Arpc4,Wasl,Ephb1,Actr3,Arpc2,Actb,Actg1,Aph1b,Rhoa,Arpc1b,Arhgef28,Cdc42,Efna1,Efna4,Efnb1,Efnb2,Efnb3,Epha1,Epha2,Epha4,Ephb2,Ephb3,Ephb4,Ptk2,Fyn,Hras,Sdc2,Itsn1,Lyn,Mmp2,Mmp9,Nck2,Psen2,Rac1,Rock1,Rock2,Git1,Sdcbp,Src,Kalrn,Ngef,Arhgef7,Rasa1,Vav2,Yes1,Arpc3,Arpc1a,Ncstn,Pak2,Aph1a
FCERI mediated NF-kB activation	2.80008	0.00176194	Psmd6,Tab1,Ube2v1,Psmd12,Psmd5,Psmc6,Psmd9,Tab2,Psmd11,Psmd1,Psme4,Fbxw11,Psmb11,Card11,Malt1,Bcl10,Rps27a,Fcer1g,Ikbkb,Ikbkg,Psmb9,Psmb8,Lyn,Psmd7,Nfkb1,Nfkbia,Pdpk1,Psma2,Psma3,Psmb1,Psmb10,Psmb4,Psmb5,Psmb6,Psmb7,Psmc1,Psmc2,Psmc3,Psmc5,Psmd4,Psme1,Psme2,Psme3,Ube2d1,Cdc34,Rela,Psmd10,Skp1,Psmd2,Traf6,Psmd3,Uba52,Ubb,Ube2d2a,Psmc4,Psmd13,Psmd8,Psmd14,Map3k7,Psma1,Psma4,Psma5,Psma6,Psma7,Psmb2,…
ECM proteoglycans	3.06714	0.00176194	Itga9,Col6a5,App,Itga8,Bgn,Col3a1,Col5a1,Col5a2,Col6a1,Col6a2,Col1a1,Col1a2,Hapln1,Dag1,Dcn,Fn1,Hspg2,Tnxb,Itga2,Itga2b,Itgav,Itgax,Itgb1,Itgb3,Itgb5,Itgb6,Matn3,Matn4,Sparc,Col5a3,Tnc
HDACs deacetylate histones	3.05691	0.00176194	Gatad2b,Kdm1a,H4c17,H2aj,H4c8,Hdac8,Gatad2a,Suds3,Hdac10,Hdac1,Arid4a,Brms1,Chd4,Hdac2,H2ac18,Hmg20b,Tbl1xr1,Rbbp7,Mbd3,Sap30l,Mta3,Rbbp4,Rest,Sap18,Chd3,Ncor2,Rcor1,Tbl1x,Gps2,Mta2,H3c2,H4c11,H2aw,H2ac10,H2bc8,H2bc11,H2bc3,H2bc21,Sap30,Phf21a,Arid4b,H4c14,H2ac21,H3c1
Chromatin modifying enzymes	2.45764	0.00176194	Gatad2b,Setd6,Ing5,Dpy30,Coprs,Kdm4a,Smarcd3,Riox2,Prmt6,Smarca2,Kdm1a,H4c17,Kat8,Kmt5a,Smarcc2,H2aj,Kmt5c,Kmt2e,H4c8,Kansl2,Smyd3,Setd1a,Meaf6,Nsd3,Hdac8,Wdr77,Gatad2a,Prdm16,Arid5b,Kdm3a,Setd2,Suds3,Prmt3,Brpf3,Hdac10,Jade1,Setd7,Hdac1,Msl1,Arid4a,Brms1,Hat1,Jmjd6,Nsd2,Chd4,Wdr5,Ogt,Kmt2b,Kdm5b,Arid1b,Kdm7a,Kansl1,Kdm4c,Jade2,Setd1b,Arid2,Aebp2,Dot1l,Ehmt2,Atf2,Ehmt1,Msl2,Ccnd1,Cdk4,Brpf1,Padi6…
Detoxification of Reactive Oxygen Species	3.15864	0.00176194	Nudt2,Prdx3,Prdx6,Cat,Ccs,Cyba,Cybb,Cycs,Gpx1,Gpx2,Gpx3,Gsr,Gstp1,Nox4,Txnrd1,Ero1a,Ncf1,Ncf2,P4hb,Prdx1,Sod1,Sod2,Sod3,Prdx2,Prdx5,Txn1,Txn2,Txnrd2
HSP90 chaperone cycle for steroid hormone receptors (SHR) in the presence of ligand	2.89217	0.00176194	Dctn4,Tubb6,Dynll2,Dctn2,Dync1li2,Dync1li1,Tubb2b,Tubal3,Capza2,Capzb,Dctn1,Dync1h1,Dync1i2,Fkbp4,Fkbp5,Hspa8,Hspa1l,Dnaja1,Hspa2,Hsp90ab1,Hsp90aa1,Dnajb1,Dctn3,Stip1,Actr1a,Tuba1a,Tuba1b,Tuba4a,Tubb3,Dctn6,Ptges3,Actr10,Dnaja2,Dynll1,Dnaja4,Dctn5,Hspa1a,Tubb4b
Class A/1 (Rhodopsin-like receptors)	-3.20538	0.00176194	Plppr4,Cxcl16,Prlh,Ece1,Lpar6,Nts,Taar3,Ffar2,Ffar1,Ffar3,P2ry6,P2ry12,Gpr37l1,P2ry13,Gpr68,Rxfp2,P2ry14,Oxgr1,Rxfp3,Nln,Gpr31b,Adora1,Adora2a,Adora2b,Adra2a,Adra2c,Adrb1,Adrb2,Agtr1a,App,Taar9,Bdkrb1,Bdkrb2,C3,C3ar1,C5ar1,Npb,Cck,Chrm1,Chrm4,Rxfp4,Cxcr3,Cxcr4,Ccr9,Ccr4,Ccr5,Ccr8,Ccr10,Ackr3,Cort,Cx3cr1,P2ry10,Opn3,S1pr3,Edn1,Edn2,Edn3,Ednra,Ednrb,F2r,F2rl1,F2rl2,Fpr2,Fpr-rs3,Fpr1,Chrm2,Gal,Gnrh1…
L1CAM interactions	3.47775	0.00176194	Cltc,Tubb6,Ap2s1,Itga9,Ap2b1,Tubb2b,Tubal3,Actb,Actg1,Ap2a1,Ap2a2,Ap2m1,Dpysl2,Csnk2a1,Csnk2a2,Csnk2b,Dnm1,Dnm2,Egfr,Fgfr1,Itga2b,Itga5,Itgav,Itgb1,Itgb3,Msn,Ncam1,Nrp1,Numb,Rac1,Rdx,Sh3gl2,Sdcbp,Sptbn1,Src,Tuba1a,Tuba1b,Tuba4a,Tubb3,Vav2,Ezr,Ranbp9,Lypla2,Map2k1,Map2k2,Mapk1,Mapk3,Tubb4b
NCAM signaling for neurite out-growth	2.90993	0.00176194	Rps6ka5,Col6a5,Col3a1,Col4a1,Col4a2,Col5a1,Col5a2,Col6a1,Col6a2,Creb1,Ptk2,Fyn,Grb2,Hras,Kras,Ncam1,Ptpra,St8sia2,St8sia4,Sos1,Sptbn1,Col5a3,Mapk1,Mapk3
Peptide ligand-binding receptors	-2.68236	0.00176194	Cxcl16,Prlh,Ece1,Nts,Gpr37l1,Rxfp2,Rxfp3,Nln,Agtr1a,App,Bdkrb1,Bdkrb2,C3,C3ar1,C5ar1,Npb,Cck,Rxfp4,Cxcr3,Cxcr4,Ccr9,Ccr4,Ccr5,Ccr8,Ccr10,Ackr3,Cort,Cx3cr1,Edn1,Edn2,Edn3,Ednra,Ednrb,F2r,F2rl1,F2rl2,Fpr2,Fpr-rs3,Fpr1,Gal,Nmur1,Cxcl1,Hcrt,Cxcr6,Rln3,Kiss1r,Anxa1,Mc2r,Mc3r,Prok2,Nmbr,Kiss1,Npy1r,Npy2r,Npy5r,Ntsr1,Oprd1,Oprk1,Oprl1,Oxt,Oxtr,Penk,Ccl21a,Pomc,Psap,Nmur2,Ccl12,Ccl22,Ccl25,Ccl27a,Ccl4,Cc…
Regulation of Insulin-like Growth Factor (IGF) transport and uptake by Insulin-like Growth Factor Binding Proteins (IGFBPs)	2.9681	0.00176194	Bpifb2,Fuca2,Pnpla2,Shisa5,Pcsk9,Eva1a,Apol11a,Qsox1,Pdia6,Apol9b,Ltbp1,Mgat4a,Golm1,Apob,Mxra8,Spp2,Apol8,Apol7a,Apol7c,Mia3,Prss23,Adam10,Amelx,Aplp2,Apoa1,Apoe,App,Fam20a,Bmp4,C3,C4b,Calu,Chgb,Cp,Csf1,Cst3,Sparcl1,Fbn1,Fn1,Fstl1,Gas6,Fam20c,Sdc2,Apol10a,Igf1,Igf2,Ccn1,Igfbp2,Igfbp3,Igfbp4,Igfbp5,Igfbp6,Il6,Itih2,Ktn1,Lamb1,Lamb2,Lgals1,Matn3,Men1,Mfge8,Fstl3,Nucb1,P4hb,Pappa,Penk,Prkcsh,Proc,C…
Olfactory Signaling Pathway	-3.51321	0.00176194	Olfr78,Gnal,Gnb1,Olfr15,Olfr31,Olfr263,Olfr735,Olfr1016,Olfr222,Olfr417,Olfr845,Olfr745,Olfr918,Olfr1512,Olfr933,Olfr307,Olfr411,Olfr414,Olfr508,Olfr273,Olfr147,Olfr376,Olfr172,Olfr173,Olfr1047,Olfr1044,Olfr558,Olfr979,Olfr723,Gng13
ABC-family proteins mediated transport	2.9141	0.00176194	Psmd6,Erlec1,Psmd12,Psmd5,Psmc6,Psmd9,Eif2s2,Abcg8,Derl1,Psmd11,Psmd1,Derl3,Psme4,Vcp,Psmb11,Abcb6,Abcb8,Abcc4,Abcc3,Abcb7,Abcg1,Abcd1,Apoa1,Abcb5,Cftr,Rps27a,Abcc2,Eif2s1,Erlin2,Psmb9,Psmb8,Abcc1,Psmd7,Derl2,Abcb1a,Psma2,Psma3,Psmb1,Psmb10,Psmb4,Psmb5,Psmb6,Psmb7,Psmc1,Psmc2,Psmc3,Psmc5,Psmd4,Psme1,Psme2,Psme3,Pex19,Abcd3,Os9,Sel1l,Psmd10,Abca5,Abcc9,Rnf5,Psmd2,Psmd3,Uba52,Ubb,Abcb10,Abcb9,Pex3,…
Beta-catenin independent WNT signaling	2.80972	0.00176194	Gng11,Smurf2,Psmd6,Psmd12,Psmd5,Psmc6,Psmd9,Cltc,Ap2s1,Psmd11,Psmd1,Psme4,Ap2b1,Rac3,Psmb11,Cltb,Smurf1,Ap2a1,Ap2a2,Ap2m1,Rhoa,Daam1,Calm1,Calm2,Calm3,Ctnnb1,Rps27a,Dvl1,Dvl2,Dvl3,Fzd1,Fzd4,Fzd5,Fzd6,Fzd8,Gnao1,Gnb1,Gnb2,Gnb4,Gnb5,Gng10,Gng2,Gng4,Gng5,Gngt2,Kras,Lef1,Psmb9,Psmb8,Psmd7,Nlk,Pde6g,Pfn1,Prkca,Plcb1,Plcb2,Plcb3,Ppp3ca,Ppp3cb,Ppp3r1,Psma2,Psma3,Psmb1,Psmb10,Psmb4,Psmb5,Psmb6,Psmb7,Psmc…
EPHB-mediated forward signaling	3.02819	0.00176194	Actr2,Arpc5,Arpc4,Wasl,Ephb1,Actr3,Arpc2,Actb,Actg1,Rhoa,Arpc1b,Arhgef28,Cdc42,Efnb1,Efnb2,Efnb3,Ephb2,Ephb3,Ephb4,Ptk2,Fyn,Hras,Sdc2,Itsn1,Lyn,Rac1,Rock1,Rock2,Src,Kalrn,Rasa1,Yes1,Arpc3,Arpc1a
PCP/CE pathway	2.62954	0.00176194	Smurf2,Psmd6,Psmd12,Psmd5,Psmc6,Psmd9,Cltc,Ap2s1,Psmd11,Psmd1,Psme4,Ap2b1,Rac3,Psmb11,Cltb,Smurf1,Ap2a1,Ap2a2,Ap2m1,Rhoa,Daam1,Rps27a,Dvl1,Dvl2,Dvl3,Fzd1,Fzd4,Fzd5,Fzd6,Fzd8,Psmb9,Psmb8,Psmd7,Pfn1,Prkca,Psma2,Psma3,Psmb1,Psmb10,Psmb4,Psmb5,Psmb6,Psmb7,Psmc1,Psmc2,Psmc3,Psmc5,Psmd4,Psme1,Psme2,Psme3,Rac1,Rac2,Arrb2,Psmd10,Psmd2,Psmd3,Uba52,Ubb,Wnt11,Wnt5a,Pard6a,Psmc4,Psmd13,Fzd2,Psmd8,Psmd14,Psma…
Axon guidance	3.26225	0.00176194	Frs2,Psenen,Actr2,Cltc,Pdlim7,Arpc5,Plxnd1,Tubb6,Arpc4,Dock1,Arhgap35,Ap2s1,Itga9,Plxnb1,Ap2b1,Usp33,Rps6ka5,Wasl,Ephb1,Tubb2b,Actr3,Tubal3,Pik3cb,Col6a5,Arpc2,Abl1,Actb,Actg1,Aph1b,Ap2a1,Ap2a2,Ap2m1,Rhoa,Rhob,Rhoc,Arpc1b,Artn,Rap1gap,Arhgef28,Cdc42,Cdk5,Rps27a,Cxcr4,Col3a1,Col4a1,Col4a2,Col5a1,Col5a2,Col6a1,Col6a2,Creb1,Crmp1,Dpysl2,Csnk2a1,Csnk2a2,Csnk2b,Dab1,Dag1,Dnm1,Dnm2,Dok1,Dok2,Efna1,Efna…
SIRT1 negatively regulates rRNA expression	3.18513	0.00176194	H4c17,H2aj,H4c8,H2az2,H3f3a,H3f3b,H2ac18,H2ax,H2az1,Suv39h1,H3c2,H4c11,H2ac10,H2bc11,H2bc3,H2bc21,Sirt1,H4c14,H3c1
NoRC negatively regulates rRNA expression	3.43457	0.00176194	H4c17,H2aj,H4c8,H2az2,H3f3a,H3f3b,H2ac18,H2ax,Mbd2,H2az1,H3c2,H4c11,H2ac10,H2bc11,H2bc3,H2bc21,H4c14,H3c1
Deadenylation of mRNA	2.76103	0.00176194	Tut4,Cnot6l,Cnot3,Cnot8,Pan2,Cnot1,Cnot6,Cnot2,Pan3,Parn,Eif4b,Eif4g1,Cnot10,Eif4a1,Eif4a2,Eif4e,Tut7,Pabpc1,Cnot7,Cnot11,Cnot4,Paip1,Cnot9,Eif4a3,Tnks1bp1
Lysosome Vesicle Biogenesis	3.00979	0.00176194	Cltc,Ap4b1,Chmp2a,Txndc5,Cltb,Ap4e1,Ap1s2,Gns,Arrb1,Ap1b1,Ap1g1,Ap1g2,Ap1m1,Ap1m2,Ap1s1,Ap4m1,Ap4s1,App,Arf1,Dnase2a,Dnm2,Bloc1s1,Hgs,Hspa8,M6pr,Sh3gl2,Vamp2,Vamp8,Ap1s3,Ctsz
Golgi Associated Vesicle Biogenesis	3.29459	0.00176194	Snx9,Cltc,Ap4b1,Necap1,Gak,Snx2,Bloc1s3,Snx5,Picalm,Acbd3,Txndc5,Ap4e1,Ap1s2,Napa,Arrb1,Ap1b1,Ap1g1,Ap1m1,Ap1m2,Ap1s1,Ap3b1,Ap3s1,Arf1,Yipf6,Cpd,Dnm2,Fth1,Bloc1s1,Pum1,Hspa8,Igf2r,Tbc1d8b,Bloc1s6,Pik3c2a,Bloc1s4,Rab5c,Sh3gl2,Snapin,Sort1,Tpd52,Tfrc,Tgoln1,Vamp2,Vamp8,Ap1s3,Ocrl,Sh3d19,Golgb1,Dtnbp1,Hip1r
Recycling pathway of L1	3.34859	0.00176194	Cltc,Tubb6,Ap2s1,Ap2b1,Tubb2b,Tubal3,Actb,Actg1,Ap2a1,Ap2a2,Ap2m1,Dpysl2,Dnm1,Dnm2,Msn,Numb,Rdx,Sh3gl2,Src,Tuba1a,Tuba1b,Tuba4a,Tubb3,Ezr,Mapk1,Tubb4b
VEGFA-VEGFR2 Pathway	2.81695	0.00176194	Shb,Abi2,Dock1,Brk1,Mapkapk3,Nckap1l,Pik3cb,Elmo2,Elmo1,Baiap2,Them4,Prr5,Abi1,Cyfip2,Actb,Actg1,Akt1,Akt2,Rhoa,Calm1,Calm2,Calm3,Ctnna1,Ctnnb1,Ctnnd1,Cav1,Cdc42,Cdh5,Bcar1,Crk,Cyba,Cybb,Rictor,Wasf2,Ptk2,Fyn,Hras,Hspb1,Hsp90aa1,Itgav,Itgb3,Jup,Kdr,Kras,Mapkapk2,Ncf1,Ncf2,Nck1,Nck2,Nckap1,Nos3,Pdpk1,Pik3ca,Pik3r1,Pik3r2,Prkaca,Prkacb,Prkca,Prkcd,Prkcz,Plcg1,Ptk2b,Pxn,Rac1,Shc2,Rock1,Rock2,Cyfip1,…
Smooth Muscle Contraction	2.66034	0.00176194	Myl9,Myl12b,Trim72,Itga1,Actg2,Acta2,Calm1,Calm2,Calm3,Itgb5,Myl7,Myl6,Mylpf,Pxn,Myl6b,Sorbs3,Sorbs1,Tln1,Tpm1,Tpm2,Vcl,Tpm3,Myl10,Dysf,Pak2,Lmod1,Tpm4
Interleukin-1 family signaling	2.48427	0.00176194	Psmd6,Tab1,Ube2v1,Psmd12,Psmd5,Psmc6,Psmd9,Peli1,Tnip2,Tab2,Psmd11,Gsdmd,Nkiras1,Irak4,Psmd1,Psme4,Fbxw11,Nkiras2,Psmb11,Irak3,Il1rl2,Nod1,Irak2,Il33,App,Casp1,Rps27a,Hmgb1,Ikbkb,Ikbkg,Il1a,Il1b,Il1r1,Irak1,Il1rap,Il1rn,Psmb9,Psmb8,Il1rl1,Psmd7,Myd88,Nfkb1,Nfkb2,Nfkbia,Nfkbib,Sqstm1,Psma2,Psma3,Psmb1,Psmb10,Psmb4,Psmb5,Psmb6,Psmb7,Psmc1,Psmc2,Psmc3,Psmc5,Psmd4,Psme1,Psme2,Psme3,Rela,S100b,Psmd10,…
Signaling by Interleukins	2.17378	0.00176194	Psmd6,Tab1,Ube2v1,Il22ra1,Psmd12,Psmd5,Psmc6,Psmd9,Peli1,Tnip2,Dusp6,Ifnl2,Tab2,Vrk3,Psmd11,Gsdmd,Nkiras1,Mapkapk3,Irak4,Psmd1,Psme4,Fbxw11,Dusp7,Nkiras2,Dusp3,Rps6ka5,Il20ra,Psmb11,Irak3,Il1rl2,Pik3cb,Nod1,Rapgef1,Irak2,Il31,Il34,Txlna,Il33,App,Atf1,Atf2,Casp1,Casp3,Cbl,Socs3,Socs1,Rps27a,Cntfr,Creb1,Crk,Crkl,Csf1,Csf1r,Csf2ra,Csf3r,Ctf1,Ifnlr1,Fos,Fyn,Grb2,Hck,Ptpn6,Hmgb1,Ikbkb,Ikbkg,Il10ra,Il1…
AUF1 (hnRNP D0) binds and destabilizes mRNA	2.83452	0.00176194	Psmd6,Psmd12,Psmd5,Psmc6,Psmd9,Psmd11,Psmd1,Psme4,Psmb11,Hnrnpd,Eif4g1,Rps27a,Hspa8,Hspb1,Psmb9,Psmb8,Psmd7,Pabpc1,Psma2,Psma3,Psmb1,Psmb10,Psmb4,Psmb5,Psmb6,Psmb7,Psmc1,Psmc2,Psmc3,Psmc5,Psmd4,Psme1,Psme2,Psme3,Psmd10,Psmd2,Psmd3,Uba52,Ubb,Psmc4,Psmd13,Psmd8,Psmd14,Psma1,Psma4,Psma5,Psma6,Psma7,Psmb2,Psmb3,Psmf1
Regulation of mRNA stability by proteins that bind AU-rich elements	2.84855	0.00176194	Exosc3,Psmd6,Exosc7,Exosc1,Psmd12,Psmd5,Psmc6,Psmd9,Psmd11,Tnfsf13,Exosc8,Psmd1,Dcp2,Psme4,Xpo1,Dis3,Psmb11,Parn,Tnpo1,Dcp1a,Exosc4,Akt1,Anp32a,Hnrnpd,Eif4g1,Zfp36l1,Rps27a,Hspa8,Hspb1,Elavl1,Khsrp,Psmb9,Psmb8,Mapkapk2,Psmd7,Exosc9,Pabpc1,Prkca,Prkcd,Psma2,Psma3,Psmb1,Psmb10,Psmb4,Psmb5,Psmb6,Psmb7,Psmc1,Psmc2,Psmc3,Psmc5,Psmd4,Psme1,Psme2,Psme3,Psmd10,Ywhab,Psmd2,Psmd3,Uba52,Ubb,Ywhaz,Zfp36,Set,…
Chromatin organization	2.45764	0.00176194	Gatad2b,Setd6,Ing5,Dpy30,Coprs,Kdm4a,Smarcd3,Riox2,Prmt6,Smarca2,Kdm1a,H4c17,Kat8,Kmt5a,Smarcc2,H2aj,Kmt5c,Kmt2e,H4c8,Kansl2,Smyd3,Setd1a,Meaf6,Nsd3,Hdac8,Wdr77,Gatad2a,Prdm16,Arid5b,Kdm3a,Setd2,Suds3,Prmt3,Brpf3,Hdac10,Jade1,Setd7,Hdac1,Msl1,Arid4a,Brms1,Hat1,Jmjd6,Nsd2,Chd4,Wdr5,Ogt,Kmt2b,Kdm5b,Arid1b,Kdm7a,Kansl1,Kdm4c,Jade2,Setd1b,Arid2,Aebp2,Dot1l,Ehmt2,Atf2,Ehmt1,Msl2,Ccnd1,Cdk4,Brpf1,Padi6…
GPCR ligand binding	-2.95311	0.00176194	Plppr4,Gng11,Cxcl16,Prlh,Ece1,Lpar6,Nts,Taar3,Ffar2,Ffar1,Ffar3,P2ry6,P2ry12,Grm4,Gpr37l1,P2ry13,Gpr68,Rxfp2,P2ry14,Grm5,Grm6,Oxgr1,Rxfp3,Nln,Gpr31b,Adm,Adora1,Adora2a,Adora2b,Adra2a,Adra2c,Adrb1,Adrb2,Agtr1a,App,Taar9,Bdkrb1,Bdkrb2,C3,C3ar1,C5ar1,Calca,Npb,Cck,Chrm1,Chrm4,Rxfp4,Cxcr3,Cxcr4,Ccr9,Ccr4,Ccr5,Ccr8,Ccr10,Ackr3,Cort,Gabbr2,Cx3cr1,P2ry10,Opn3,S1pr3,Edn1,Edn2,Edn3,Ednra,Ednrb,Adgre1,F2r,…
Negative epigenetic regulation of rRNA expression	3.22746	0.00176194	H4c17,H2aj,H4c8,H2az2,H3f3a,H3f3b,H2ac18,H2ax,Mbd2,H2az1,Suv39h1,H3c2,H4c11,H2ac10,H2bc11,H2bc3,H2bc21,Sirt1,H4c14,H3c1
Programmed Cell Death	3.18277	0.00176194	Chmp4c,Diablo,Chmp3,Oma1,Peli1,Dynll2,Chmp2b,Chmp2a,Gsdmd,Tradd,Chmp7,Clspn,Appl1,Bmf,Ticam1,Dnm1l,Opa1,Aven,Mlkl,Ogt,Chmp4b,Dsp,Chmp6,Add1,Apaf1,Birc3,Birc2,Xiap,Bad,Bak1,Bax,Bcl2,Bcl2l1,Bid,Bcl2l11,Bmx,Casp1,Casp4,Casp3,Casp6,Casp7,Casp8,Casp9,Ctnnb1,Cd14,Cdc37,Cdh1,Cflar,Rps27a,Cycs,Dbnl,Dffa,Dsg2,Fadd,Ptk2,Fas,Flot1,Flot2,Fnta,Gzmb,H1f3,H1f0,Hmgb1,H1f1,Hsp90aa1,Il1a,Il1b,Kpnb1,Kpna1,Lmna,Lmnb…
Hedgehog ligand biogenesis	2.75103	0.00176194	Psmd6,Erlec1,Psmd12,Psmd5,Psmc6,Psmd9,Psmd11,Psmd1,Psme4,Vcp,Psmb11,Rps27a,Ihh,Psmb9,Psmb8,Psmd7,Disp2,P4hb,Derl2,Psma2,Psma3,Psmb1,Psmb10,Psmb4,Psmb5,Psmb6,Psmb7,Psmc1,Psmc2,Psmc3,Psmc5,Psmd4,Psme1,Psme2,Psme3,Os9,Sel1l,Psmd10,Psmd2,Psmd3,Uba52,Ubb,Psmc4,Psmd13,Psmd8,Psmd14,Psma1,Psma4,Psma5,Psma6,Psma7,Psmb2,Psmb3,Psmf1
Mitochondrial translation	2.48977	0.00176194	Mrpl54,Aurkaip1,Chchd1,Mrps36,Mrpl4,Mrpl35,Mrps28,Mrps16,Mrps17,Mrps26,Mrps21,Mrps15,Mrpl11,Mrpl20,Mrpl51,Mrpl33,Mrps18b,Mrpl45,Mrpl55,Mrpl42,Mrpl46,Mrpl18,Mrpl24,Mrpl57,Mrrf,Mrpl14,Mrpl53,Mrpl13,Mrps18a,Mrpl58,Mrpl28,Mrps35,Mrps18c,Mrpl52,Oxa1l,Mrpl44,Gadd45gip1,Mrps9,Ptcd3,Mrpl47,Mrpl41,Mrpl10,Mrpl30,Mrpl32,Mtrf1l,Mrps5,Mrpl9,Mrps34,Mrps33,Mrps7,Mrpl40,Mrpl49,Mrpl48,Mrpl23,Mrps2,Mrpl22,Mrps27,M…
Mitochondrial translation elongation	2.67038	0.00176194	Mrpl54,Aurkaip1,Chchd1,Mrps36,Mrpl4,Mrpl35,Mrps28,Mrps16,Mrps17,Mrps26,Mrps21,Mrps15,Mrpl11,Mrpl20,Mrpl51,Mrpl33,Mrps18b,Mrpl45,Mrpl55,Mrpl42,Mrpl46,Mrpl18,Mrpl24,Mrpl57,Mrpl14,Mrpl53,Mrpl13,Mrps18a,Mrpl58,Mrpl28,Mrps35,Mrps18c,Mrpl52,Oxa1l,Mrpl44,Gadd45gip1,Mrps9,Ptcd3,Mrpl47,Mrpl41,Mrpl10,Mrpl30,Mrpl32,Mrps5,Mrpl9,Mrps34,Mrps33,Mrps7,Mrpl40,Mrpl49,Mrpl48,Mrpl23,Mrps2,Mrpl22,Mrps27,Mrps6,Mrpl37,…
Mitochondrial translation termination	2.47275	0.00176194	Mrpl54,Aurkaip1,Chchd1,Mrps36,Mrpl4,Mrpl35,Mrps28,Mrps16,Mrps17,Mrps26,Mrps21,Mrps15,Mrpl11,Mrpl20,Mrpl51,Mrpl33,Mrps18b,Mrpl45,Mrpl55,Mrpl42,Mrpl46,Mrpl18,Mrpl24,Mrpl57,Mrrf,Mrpl14,Mrpl53,Mrpl13,Mrps18a,Mrpl58,Mrpl28,Mrps35,Mrps18c,Mrpl52,Oxa1l,Mrpl44,Gadd45gip1,Mrps9,Ptcd3,Mrpl47,Mrpl41,Mrpl10,Mrpl30,Mrpl32,Mtrf1l,Mrps5,Mrpl9,Mrps34,Mrps33,Mrps7,Mrpl40,Mrpl49,Mrpl48,Mrpl23,Mrps2,Mrpl22,Mrps27,M…
Dectin-1 mediated noncanonical NF-kB signaling	2.73593	0.00176194	Psmd6,Psmd12,Psmd5,Psmc6,Psmd9,Psmd11,Psmd1,Psme4,Fbxw11,Psmb11,Rps27a,Psmb9,Psmb8,Psmd7,Nfkb2,Psma2,Psma3,Psmb1,Psmb10,Psmb4,Psmb5,Psmb6,Psmb7,Psmc1,Psmc2,Psmc3,Psmc5,Psmd4,Psme1,Psme2,Psme3,Relb,Psmd10,Map3k14,Skp1,Psmd2,Psmd3,Uba52,Ubb,Ube2m,Uba3,Psmc4,Psmd13,Psmd8,Psmd14,Psma1,Psma4,Psma5,Psma6,Psma7,Psmb2,Psmb3,Cul1,Psmf1
CLEC7A (Dectin-1) signaling	2.93691	0.00176194	Psmd6,Tab1,Ube2v1,Pycard,Psmd12,Psmd5,Psmc6,Psmd9,Tab2,Psmd11,Psmd1,Psme4,Fbxw11,Plcg2,Psmb11,Card11,Malt1,Bcl10,Calm1,Calm2,Calm3,Casp8,Rps27a,Ikbkb,Ikbkg,Il1b,Psmb9,Psmb8,Psmd7,Nfatc2,Nfkb1,Nfkb2,Nfkbia,Pdpk1,Prkcd,Ppp3ca,Ppp3cb,Ppp3r1,Psma2,Psma3,Psmb1,Psmb10,Psmb4,Psmb5,Psmb6,Psmb7,Psmc1,Psmc2,Psmc3,Psmc5,Psmd4,Psme1,Psme2,Psme3,Ube2d1,Cdc34,Rela,Relb,Psmd10,Src,Map3k14,Skp1,Psmd2,Traf6,Psmd3…
C-type lectin receptors (CLRs)	3.00263	0.00176194	Psmd6,Ep300,Tab1,Ube2v1,Pycard,Psmd12,Psmd5,Psmc6,Psmd9,Tab2,Psmd11,Psmd1,Psme4,Fbxw11,Plcg2,Cd209a,Rps6ka5,Psmb11,Card11,Malt1,Raf1,Bcl10,Calm1,Calm2,Calm3,Casp8,Rps27a,Fcer1g,Fyn,Hras,Icam2,Ikbkb,Ikbkg,Il1b,Kras,Psmb9,Psmb8,Lyn,Psmd7,Nfatc2,Nfkb1,Nfkb2,Nfkbia,Pdpk1,Prkaca,Prkacb,Prkcd,Ppp3ca,Ppp3cb,Ppp3r1,Psma2,Psma3,Psmb1,Psmb10,Psmb4,Psmb5,Psmb6,Psmb7,Psmc1,Psmc2,Psmc3,Psmc5,Psmd4,Psme1,Psme2…
RHO GTPases activate PKNs	3.67529	0.00176194	Pkn3,Kdm1a,H4c17,Ppp1r14a,H2aj,H4c8,Pkn2,Kdm4c,Rhoa,Rhob,Rhoc,H2az2,Cdc25c,H3f3a,H3f3b,H2ac18,H2ax,Ppp1r12a,Ncoa2,Pdpk1,H2az1,Ppp1cb,Rac1,Ywhab,Ywhae,Ywhag,Ywhah,Ywhaq,Ywhaz,Sfn,H3c2,H4c11,H2ac10,H2bc11,H2bc3,H2bc21,Pkn1,H4c14,H3c1
Activated PKN1 stimulates transcription of AR (androgen receptor) regulated genes KLK2 and KLK3	3.27422	0.00176194	Kdm1a,H4c17,H2aj,H4c8,Kdm4c,H2az2,H3f3a,H3f3b,H2ac18,H2ax,Ncoa2,H2az1,H3c2,H4c11,H2ac10,H2bc11,H2bc3,H2bc21,Pkn1,H4c14,H3c1
RHO GTPases activate PAKs	3.39034	0.00176194	Myl9,Myl12b,Myh14,Myh10,Calm1,Calm2,Calm3,Cdc42,Limk1,Myh9,Myl6,Ppp1r12a,Nf2,Ppp1cb,Rac1,Pak2,Flna
TP53 Regulates Metabolic Genes	3.30573	0.00176194	Lamtor4,Cox7b,Cox20,Cox14,Lamtor1,Sesn2,Cox18,Cox19,Rraga,Lamtor5,Cox11,Taco1,Slc38a9,Lrpprc,Prkaa1,Ddit4,Sesn1,Prkaa2,Prkag2,Sesn3,Akt1,Akt2,Cox6b1,Cox4i1,Cox5a,Cox6a1,Cox7c,Cox8a,Cycs,G6pdx,Gls,Gpi1,Gpx2,Gsr,Txnrd1,Lamtor2,Ndufa4,Prdx1,Prkab1,Rragd,Rheb,Sco1,Cox7a2l,Surf1,Rragc,Ywhab,Prdx2,Prdx5,Sco2,Txn1,Ywhae,Ywhag,Ywhah,Ywhaq,Ywhaz,Sfn,Akt3,Lamtor3,Mlst8,Mtor,Tigar,Tsc1
RHO GTPases Activate WASPs and WAVEs	3.34545	0.00176194	Actr2,Abi2,Arpc5,Arpc4,Wipf2,Brk1,Nckap1l,Wasl,Actr3,Baiap2,Arpc2,Abi1,Cyfip2,Abl1,Actb,Actg1,Arpc1b,Btk,Cdc42,Wasf2,Ptk2,Grb2,Nckipsd,Nck1,Nckap1,Wipf1,Rac1,Cyfip1,Was,Arpc3,Arpc1a,Mapk1,Mapk3
RAF activation	3.00558	0.00176194	Brap,Camk2d,Braf,Araf,Raf1,Calm1,Calm2,Calm3,Camk2b,Camk2g,Hras,Jak2,Kras,Ksr1,Mark3,Mras,Phb,Ppp2r1a,Ppp1cb,Ppp1cc,Ppp2ca,Ppp2cb,Src,Ywhab,Shoc2,Map2k1,Map2k2,Map3k11,Ppp2r5c,Ppp2r5e,Ppp2r5b,Ppp2r5a
RAF/MAP kinase cascade	2.54215	0.00176194	Frs2,Psmd6,Psmd12,Psmd5,Psmc6,Psmd9,Dusp6,Wdr83,Spred3,Psmd11,Rasgrp4,Dab2ip,Abhd17c,Psmd1,Dusp16,Psme4,Dusp7,Epgn,Brap,Il17rd,Psmb11,Pik3cb,Camk2d,Syngap1,Rasgrp3,Dusp5,Arrb1,Actb,Actg1,Braf,Rap1a,Araf,Areg,Raf1,Artn,Bcl2l1,Zdhhc9,Fntb,Calm1,Calm2,Calm3,Camk2b,Camk2g,Rps27a,Csf2ra,Csk,Dlg1,Dlg4,Egfr,Erbb2,Ereg,Ptk2,Fgf15,Fgf2,Fgf7,Fgf9,Fgfr1,Fgfr2,Flt3l,Fn1,Fnta,Fyn,Gdnf,Gfra3,Gfra4,Kbtbd7,Grb2,…
MAP2K and MAPK activation	3.3498	0.00176194	Wdr83,Il17rd,Arrb1,Actb,Actg1,Braf,Rap1a,Araf,Raf1,Csk,Fn1,Hras,Itga2b,Itgb3,Kras,Ksr1,Mark3,Lamtor2,Rap1b,Arrb2,Src,Ywhab,Apbb1ip,Tln1,Vcl,Vwf,Lamtor3,Pebp1,Map2k1,Map2k2,Mapk1,Mapk3,Iqgap1,Cnksr1
Negative regulation of MAPK pathway	2.93703	0.00176194	Dusp6,Dusp16,Dusp7,Brap,Dusp5,Braf,Araf,Raf1,Rps27a,Hras,Kras,Ksr1,Mark3,Dusp8,Ppp2r1a,Ppp2ca,Ppp2cb,Ppp5c,Dusp1,Ptpn3,Ywhab,Uba52,Ubb,Pebp1,Dusp4,Map2k1,Map2k2,Mapk1,Mapk3,Ppp2r5c,Ppp2r5e,Ppp2r5b,Mapk12,Ppp2r5a,Dusp10
NIK-->noncanonical NF-kB signaling	2.73593	0.00176194	Psmd6,Psmd12,Psmd5,Psmc6,Psmd9,Psmd11,Psmd1,Psme4,Fbxw11,Psmb11,Rps27a,Psmb9,Psmb8,Psmd7,Nfkb2,Psma2,Psma3,Psmb1,Psmb10,Psmb4,Psmb5,Psmb6,Psmb7,Psmc1,Psmc2,Psmc3,Psmc5,Psmd4,Psme1,Psme2,Psme3,Relb,Psmd10,Map3k14,Skp1,Psmd2,Psmd3,Uba52,Ubb,Ube2m,Uba3,Psmc4,Psmd13,Psmd8,Psmd14,Psma1,Psma4,Psma5,Psma6,Psma7,Psmb2,Psmb3,Cul1,Psmf1
MAPK1/MAPK3 signaling	2.55233	0.00176194	Frs2,Psmd6,Psmd12,Psmd5,Psmc6,Psmd9,Dusp6,Wdr83,Spred3,Psmd11,Rasgrp4,Dab2ip,Abhd17c,Psmd1,Dusp16,Psme4,Dusp7,Epgn,Brap,Il17rd,Psmb11,Pik3cb,Camk2d,Syngap1,Rasgrp3,Dusp5,Arrb1,Actb,Actg1,Braf,Rap1a,Araf,Areg,Raf1,Artn,Bcl2l1,Zdhhc9,Fntb,Calm1,Calm2,Calm3,Camk2b,Camk2g,Cdk1,Rps27a,Csf2ra,Csk,Dlg1,Dlg4,Egfr,Erbb2,Ereg,Ptk2,Fgf15,Fgf2,Fgf7,Fgf9,Fgfr1,Fgfr2,Flt3l,Fn1,Fnta,Fyn,Gdnf,Gfra3,Gfra4,Kbtbd7,…
MAPK6/MAPK4 signaling	2.8265	0.00176194	Cdc14a,Psmd6,Psmd12,Psmd5,Psmc6,Psmd9,Psmd11,Psmd1,Psme4,Xpo1,Septin7,Cdc42ep2,Psmb11,Ccnd3,Cdk1,Cdc42,Rps27a,Hspb1,Dnajb1,Psmb9,Psmb8,Mapkapk5,Psmd7,Mapk6,Prkaca,Prkacb,Psma2,Psma3,Psmb1,Psmb10,Psmb4,Psmb5,Psmb6,Psmb7,Psmc1,Psmc2,Psmc3,Psmc5,Psmd4,Psme1,Psme2,Psme3,Rac1,Psmd10,Kalrn,Cdc14b,Psmd2,Psmd3,Uba52,Ubb,Foxo1,Foxo3,Psmc4,Psmd13,Psmd8,Cdc42ep5,Psmd14,Psma1,Psma4,Psma5,Psma6,Psma7,Psmb2,Ps…
Deubiquitination	2.27206	0.00176194	Josd2,Ddx58,Smurf2,Psmd6,Ep300,Tab1,Rnf128,Psmd12,Psmd5,Psmc6,Psmd9,Tnip2,Tada2b,Wdr48,Usp24,Tomm20,Usp30,Rnf146,Ino80,Otub2,Babam1,Mul1,Tada3,H2aj,Ccp110,Foxk2,Psmd11,Wdr20,Tfpt,Ino80b,Psmd1,Stambp,Vcpip1,Abraxas1,Psme4,Nfrkb,Usp19,Usp28,Ifih1,Usp3,Bap1,Suds3,Usp48,Usp33,Vcp,Clspn,Otud3,Psmb11,Usp16,Josd1,Cyld,Tnks2,Otub1,Nod1,Usp47,Babam2,Ddb2,Cdc20,Asxl2,Ogt,Mat2b,Mbd5,Abraxas2,Stambpl1,Usp42,…
UCH proteinases	2.60064	0.00176194	Psmd6,Psmd12,Psmd5,Psmc6,Psmd9,Ino80,H2aj,Foxk2,Psmd11,Tfpt,Ino80b,Psmd1,Psme4,Nfrkb,Bap1,Psmb11,Asxl2,Ogt,Mbd5,Actb,Mbd6,Rps27a,Hcfc1,H2ac18,Psmb9,Psmb8,Foxk1,Psmd7,Nedd8,Uchl3,Mcrs1,Psma2,Psma3,Psmb1,Psmb10,Psmb4,Psmb5,Psmb6,Psmb7,Psmc1,Psmc2,Psmc3,Psmc5,Psmd4,Psme1,Psme2,Psme3,Psmd10,Kdm1b,Psmd2,Psmd3,Uba52,Ubb,Yy1,Uchl5,Actr8,Adrm1,Actl6a,Ruvbl1,Psmc4,Psmd13,H2aw,H2ac10,Psmd8,Psmd14,Psma1,Psm…
Ub-specific processing proteases	2.5075	0.00176194	Ddx58,Smurf2,Psmd6,Tab1,Rnf128,Psmd12,Psmd5,Psmc6,Psmd9,Tada2b,Wdr48,Usp24,Tomm20,Usp30,Rnf146,Mul1,Tada3,H2aj,Ccp110,Psmd11,Wdr20,Psmd1,Psme4,Usp19,Usp28,Ifih1,Usp3,Suds3,Usp48,Usp33,Clspn,Psmb11,Usp16,Cyld,Tnks2,Otub1,Usp47,Ddb2,Cdc20,Mat2b,Usp42,Arrb1,Adrb2,Il33,Birc3,Birc2,Axin1,Axin2,Cdc25a,Cftr,Rps27a,Fkbp8,Gata3,Usp15,Kat2a,Taf9b,Hgs,Hif1a,H2ac18,Ikbkg,Atxn7,Psmb9,Psmb8,Smad1,Smad2,Smad3,S…
Resolution of D-Loop Structures	-2.24263	0.00176194	Dna2,Mus81,Rmi1,Slx1b,Atm,Blm,Brca2,Gen1,Kat5,Mre11a,Rad51b,Rad51d,Slx4,Top3a,Wrn,Exo1,Nbn,Rmi2,Spidr,Rbbp8,Eme2
Resolution of D-loop Structures through Holliday Junction Intermediates	-2.24263	0.00176194	Dna2,Mus81,Rmi1,Slx1b,Atm,Blm,Brca2,Gen1,Kat5,Mre11a,Rad51b,Rad51d,Slx4,Top3a,Wrn,Exo1,Nbn,Rmi2,Spidr,Rbbp8,Eme2
Homologous DNA Pairing and Strand Exchange	-2.5181	0.00176194	Dna2,Rpa3,Rpa1,Rfc3,Topbp1,Atrip,Rfc5,Rfc4,Rmi1,Atm,Blm,Brca2,Chek1,Hus1,Kat5,Mre11a,Rad1,Rad17,Rad51b,Rad51d,Rad9a,Rfc2,Top3a,Wrn,Exo1,Nbn,Rmi2,Rbbp8
Presynaptic phase of homologous DNA pairing and strand exchange	-2.5181	0.00176194	Dna2,Rpa3,Rpa1,Rfc3,Topbp1,Atrip,Rfc5,Rfc4,Rmi1,Atm,Blm,Brca2,Chek1,Hus1,Kat5,Mre11a,Rad1,Rad17,Rad51b,Rad51d,Rad9a,Rfc2,Top3a,Wrn,Exo1,Nbn,Rmi2,Rbbp8
Respiratory electron transport	4.37332	0.00176194	Ndufb5,Ndufa3,Ndufa9,Cox7b,Uqcr10,Ndufb9,Ndufb6,Cox20,Ndufc1,Cox14,Ndufa12,Ndufa7,Cyc1,Ndufb3,Uqcrh,Tmem186,Uqcrfs1,Ndufaf3,Etfdh,Ndufb7,Uqcrc2,Ndufa6,Ndufa13,Ndufb8,Ndufa10,Cox18,Coq10b,Cox19,Ndufb4,Ndufc2,Ndufb2,Ndufa5,Ndufb10,Ndufs3,Ndufa8,Tmem126b,Ndufaf4,Ndufaf5,Ndufaf1,Cox11,Taco1,Ndufab1,Ndufs5,Ndufb11,Lrpprc,Ndufv2,Ndufaf7,Ndufs7,Ndufaf2,Timmdc1,Ndufaf6,Cox6b1,Etfb,Etfa,Ndufv3,Cox4i1,Cox5…
Major pathway of rRNA processing in the nucleolus and cytosol	3.87154	0.00176194	Isg20l2,Utp3,Bud23,Nip7,Rpl3l,Nol6,Pno1,Exosc3,Exosc7,Rps23,Rps21,Rpl15,Rpl36al,Rpl35,Exosc1,Riok3,Rpl11,Riok2,Rps10,Rpl14,Nop56,Rplp2,Utp11,Eri1,Rpl37,Rps20,Nob1,Rpl38,Rpp21,Ddx47,Noc4l,Rpl4,Rps27l,Mphosph10,Rpl22l1,Rps13,Rpl39l,Rpl24,Rpl34,Mphosph6,Nol11,Ebna1bp2,Exosc8,Imp3,Rpp25,Rps15a,Ddx49,Rpl5,Riok1,Csnk1d,Rpl23a,Tsr1,Mtrex,Wdr43,Utp14a,Utp15,Rpl12,Dis3,Wdr3,Tex10,Rpl13,Wdr75,Fcf1,Nol9,Rrp…
Complex I biogenesis	3.53638	0.00176194	Ndufb5,Ndufa3,Ndufa9,Ndufb9,Ndufb6,Ndufc1,Ndufa12,Ndufa7,Ndufb3,Tmem186,Ndufaf3,Ndufb7,Ndufa6,Ndufa13,Ndufb8,Ndufa10,Ndufb4,Ndufc2,Ndufb2,Ndufa5,Ndufb10,Ndufs3,Ndufa8,Tmem126b,Ndufaf4,Ndufaf5,Ndufaf1,Ndufab1,Ndufs5,Ndufb11,Ndufv2,Ndufaf7,Ndufs7,Ndufaf2,Timmdc1,Ndufaf6,Ndufv3,Ndufs6,Ndufa2,Ndufs4,Ndufv1,Ndufa1,Ecsit,Ndufs8,Ndufs2,Ndufs1,Acad9
Antimicrobial peptides	2.69703	0.00176194	Defa34,Defa40,Defa41,Bpifb2,Bpi,AY761185,Pdzd11,Eppin,Atox1,Atp7a,Chga,Clu,Defb1,Itln1,Lyz2,Slc11a1,Pla2g2a,Bpifa2,Reg3g,S100a8,S100a9,Defb28,Tlr1,Pglyrp1,Defa17,Tlr2,Pglyrp4,Pglyrp2,Defb42,Leap2
Keratinization	-2.27266	0.00176194	Lce1g,Krtap3-2,Krt20,Pkp2,Gm11562,1110025L11Rik,Klk5,Lce1b,Lipn,Krtap16-3,Kazn,Krtap16-1,Gm11568,Krtap1-4,Krt80,Dsp,Gm7138,Gm7137,Krt7,Gm5414,Krt77,Dsc2,Dsg2,Cela2a,Evpl,Gm11564,Jup,Krt10,Krt13,Krt14,Krt15,Krt18,Krt19,Krt1,Krt86,Krt8,Krtap12-1,Pkp1,Ppl,Rptn,Krtap10-10,Pkp3,Krt23,Perp,Pkp4,Gm11563
PTEN Regulation	2.85352	0.00176194	Gatad2b,Lamtor4,Psmd6,Lamtor1,Sall4,Wwp2,Psmd12,Psmd5,Psmc6,Psmd9,Rnf146,Rraga,Lamtor5,Maf1,Psmd11,Psmd1,Gatad2a,Psme4,Slc38a9,Otud3,Hdac1,Psmb11,Tnks2,Chd4,Prex2,Akt1,Akt2,Xiap,Bmi1,Cbx4,Phc3,Rps27a,Csnk2a1,Csnk2a2,Csnk2b,Phc1,Eed,Mecom,Ezh2,Frk,Hdac2,Rbbp7,Psmb9,Psmb8,Mbd3,Psmd7,Lamtor2,Nedd4,Mta3,Pml,Psma2,Psma3,Psmb1,Psmb10,Psmb4,Psmb5,Psmb6,Psmb7,Psmc1,Psmc2,Psmc3,Psmc5,Psmd4,Psme1,Psme2,Psm…
COPI-mediated anterograde transport	3.7255	0.00176194	Tmed3,Arfgap3,Golga2,Tmed7,Kdelr2,Tmed9,Cog6,Dctn4,Tubb6,Dynll2,Kdelr1,Tmed10,Cog4,Dctn2,Cog7,Copb1,Dync1li2,Dync1li1,Kdelr3,Tubb2b,Cog5,Gorasp1,Gbf1,Tubal3,Napg,Napa,Rab1b,Cog2,Arfgap2,Arf1,Arf3,Arf4,Arf5,Bet1,Capza2,Capzb,Copa,Dctn1,Dync1h1,Dync1i2,Cog1,Arcn1,Napb,Copb2,Nsf,Rab1a,Gosr1,Sptbn1,Dctn3,Actr1a,Copg2,Copg1,Bet1l,Tuba1a,Tuba1b,Tuba4a,Tubb3,Dctn6,Uso1,Tmed2,Copz2,Stx5a,Tmem115,Ykt6,Act…
COPI-dependent Golgi-to-ER retrograde traffic	2.83899	0.00176194	Cenpe,Tmed3,Arfgap3,Tmed7,Kdelr2,Use1,Tmed9,Kifc1,Tubb6,Kdelr1,Tmed10,Kif18b,Copb1,Stx18,Nbas,Kif23,Kif26b,Kdelr3,Tubb2b,Kif2c,Gbf1,Tubal3,Klc4,Napg,Napa,Rab1b,Kif20b,Arfgap2,Kif22,Arf1,Arf3,Arf4,Arf5,Copa,Kif26a,Kif15,Kif11,Kif13b,Kif16b,Kif1b,Kif1c,Kif2a,Kif21a,Kif21b,Kif3a,Kif3b,Kif3c,Kif5b,Kifap3,Arcn1,Napb,Copb2,Nsf,Rab1a,Kif20a,Sec22b,Surf4,Copg2,Copg1,Tuba1a,Tuba1b,Tuba4a,Tubb3,Tmed2,Copz2…
COPI-independent Golgi-to-ER retrograde traffic	2.86964	0.00176194	Rab3gap2,Dctn4,Tubb6,Dynll2,Dctn2,Dync1li2,Dync1li1,Tubb2b,Tubal3,Galnt2,Bicd2,Bicd1,Capza2,Capzb,Dctn1,Dync1h1,Dync1i2,Galnt1,Pafah1b1,Pafah1b2,Pafah1b3,Pla2g4a,Rab18,Rab6a,Pla2g6,Dctn3,Actr1a,Tuba1a,Tuba1b,Tuba4a,Tubb3,Dctn6,Actr10,Dynll1,Dctn5,Agpat3,Rab3gap1,Tubb4b
Intra-Golgi and retrograde Golgi-to-ER traffic	2.86369	0.00176194	Rab3gap2,Cenpe,Tmed3,Usp6nl,Arfgap3,Sys1,Tmed7,Plin3,Kdelr2,Use1,Snap29,Tmed9,Cog6,Dctn4,Kifc1,Tubb6,Dynll2,Kdelr1,Vps53,Tmf1,Vps51,Tmed10,Cog4,Dctn2,Rab43,Cog7,Kif18b,Copb1,Dync1li2,Stx18,Nbas,Arl1,Kif23,Dync1li1,Cyth4,Kif26b,Kdelr3,Tubb2b,Kif2c,Cog5,Gcc1,Gbf1,Tubal3,Klc4,Napg,Napa,Galnt2,Rab1b,Cog2,Trip11,Arfrp1,Alpi,Kif20b,Bicd2,Golga1,Arfip2,Arfgap2,Kif22,Arf1,Arf3,Arf4,Arf5,Bicd1,Capza2,Capz…
Assembly of the ORC complex at the origin of replication	2.92749	0.00176194	H4c17,H2aj,H4c8,H2az2,H3f3a,H3f3b,H2ac18,H2ax,Kpnb1,Kpna1,Kpna6,Orc3,Orc1,Orc2,H2az1,H3c2,H4c11,H2ac10,H2bc11,H2bc3,H2bc21,Orc4,Orc5,H4c14,H3c1
Assembly of the pre-replicative complex	2.58861	0.00176194	Psmd6,Psmd12,Psmd5,Psmc6,Psmd9,Cdt1,H4c17,H2aj,Psmd11,H4c8,Psmd1,Psme4,Psmb11,H2az2,Rps27a,E2f2,E2f3,H3f3a,H3f3b,H2ac18,H2ax,Kpnb1,Kpna1,Kpna6,Psmb9,Psmb8,Mcm3,Mcm2,Mcm4,Mcm5,Mcm6,Mcm7,Psmd7,Orc3,Orc1,Orc2,H2az1,Psma2,Psma3,Psmb1,Psmb10,Psmb4,Psmb5,Psmb6,Psmb7,Psmc1,Psmc2,Psmc3,Psmc5,Psmd4,Psme1,Psme2,Psme3,Psmd10,Psmd2,Psmd3,Uba52,Ubb,Cdc6,Psmc4,Psmd13,H3c2,H4c11,H2ac10,H2bc11,H2bc3,H2bc21,Psmd8…
Citric acid cycle (TCA cycle)	3.93644	0.00176194	Sdhc,Sdhd,Sdha,Sdhb,Idh3a,Fahd1,Idh3b,Idh2,Me2,Aco2,Cs,Dld,Dlst,Fh1,Idh3g,Mdh2,Ogdh,Sucla2,Suclg2,Suclg1
Pyruvate metabolism and Citric Acid (TCA) cycle	3.53866	0.00176194	D2hgdh,Sdhc,Sdhd,Sdha,Sdhb,Idh3a,Pdhb,Fahd1,Dlat,Idh3b,Pdk3,Idh2,Me2,Adhfe1,Aco2,Glo1,Bsg,Cs,Dld,Dlst,Fh1,Hagh,Gstz1,Slc16a3,Idh3g,Ldha,Ldhb,Ldhc,Me1,Mdh2,Ogdh,Pdha1,Pdha2,Pdk2,Ppard,Rxra,Slc16a1,Sucla2,Suclg2,L2hgdh,Pdp1,Pdp2,Vdac1,Suclg1,Pdpr,Pdhx,Pdk1
mRNA Splicing - Major Pathway	2.67308	0.00176194	Hnrnpf,Sf3b6,Cwc15,Lsm7,Ppih,Sf3b5,Clp1,Snw1,Lsm5,Polr2e,Magohb,Polr2l,Snrnp40,Snrnp27,Ctnnbl1,Prpf38a,Rbm22,Crnkl1,Fip1l1,Cwc27,Snrpd3,Cstf1,Ppil4,Xab2,Sf3a1,Cwc25,Polr2b,Ccar1,Lsm3,Polr2g,Puf60,U2surp,Srsf6,Snrpg,Bud31,Ncbp2,Upf3b,Bcas2,Sympk,Nudt21,Gcfc2,Phf5a,Syf2,Dnajc8,Gtf2f2,Ppil1,Prpf6,Snrpa1,Prpf31,Hnrnpul1,Sf3b3,Dhx16,Srsf11,U2af1l4,Polr2d,Polr2f,Snrpf,Polr2i,Prpf4,Fus,Ppil3,Cd2bp2,Sugp…
mRNA Splicing	2.55076	0.00176194	Hnrnpf,Sf3b6,Cwc15,Lsm7,Ppih,Sf3b5,Clp1,Snw1,Lsm5,Polr2e,Magohb,Polr2l,Snrnp40,Snrnp27,Ctnnbl1,Prpf38a,Rbm22,Crnkl1,Fip1l1,Zmat5,Zcrb1,Rnpc3,Cwc27,Snrpd3,Cstf1,Ppil4,Xab2,Sf3a1,Cwc25,Polr2b,Ccar1,Lsm3,Polr2g,Snrnp48,Puf60,U2surp,Srsf6,Snrpg,Bud31,Ncbp2,Upf3b,Bcas2,Sympk,Nudt21,Gcfc2,Phf5a,Syf2,Dnajc8,Gtf2f2,Ppil1,Prpf6,Snrpa1,Prpf31,Hnrnpul1,Sf3b3,Dhx16,Srsf11,U2af1l4,Polr2d,Polr2f,Snrpf,Polr2i,P…
rRNA processing	3.87154	0.00176194	Isg20l2,Utp3,Bud23,Nip7,Rpl3l,Nol6,Pno1,Exosc3,Exosc7,Rps23,Rps21,Rpl15,Rpl36al,Rpl35,Exosc1,Riok3,Rpl11,Riok2,Rps10,Rpl14,Nop56,Rplp2,Utp11,Eri1,Rpl37,Rps20,Nob1,Rpl38,Rpp21,Ddx47,Noc4l,Rpl4,Rps27l,Mphosph10,Rpl22l1,Rps13,Rpl39l,Rpl24,Rpl34,Mphosph6,Nol11,Ebna1bp2,Exosc8,Imp3,Rpp25,Rps15a,Ddx49,Rpl5,Riok1,Csnk1d,Rpl23a,Tsr1,Mtrex,Wdr43,Utp14a,Utp15,Rpl12,Dis3,Wdr3,Tex10,Rpl13,Wdr75,Fcf1,Nol9,Rrp…
Eukaryotic Translation Initiation	5.95201	0.00176194	Eif3f,Rpl3l,Rps23,Rps21,Rpl15,Rpl36al,Rpl35,Rpl11,Rps10,Rpl14,Rplp2,Eif2s2,Rpl37,Rps20,Rpl38,Rpl4,Rps27l,Rpl22l1,Rps13,Eif3h,Rpl39l,Rpl24,Rpl34,Rps15a,Rpl5,Rpl23a,Rpl12,Rpl13,Eif3k,Eif2b3,Rps25,Eif4b,Rpl18a,Rps9,Rplp0,Eif4g1,Rpl10,Eif2b1,Eif3j1,Eif2s1,Eif2b4,Eif3a,Eif4a1,Eif4a2,Eif4e,Eif4ebp1,Rpl31,Eif3e,Rpsa,Rps2,Pabpc1,Rpl18,Rpl19,Rpl22,Rpl26,Rpl27,Rpl28,Rpl29,Rpl37a,Rpl36a,Rpl6,Rpl7,Rpl9,Rps14…
Translation initiation complex formation	5.33956	0.00176194	Eif3f,Rps23,Rps21,Rps10,Eif2s2,Rps20,Rps27l,Rps13,Eif3h,Rps15a,Eif3k,Rps25,Eif4b,Rps9,Eif4g1,Eif3j1,Eif2s1,Eif3a,Eif4a1,Eif4a2,Eif4e,Eif3e,Rpsa,Rps2,Pabpc1,Rps14,Rps15,Rps16,Rps17,Rps18,Rps19,Rps24,Rps29,Rps3a1,Rps4x,Rps5,Rps6,Rps7,Rps8,Eif3g,Rps28,Eif3i,Eif4h,Eif3d,Eif3c,Rps27,Eif2s3x,Rps3,Eif3l,Rps11,Rps26,Eif3b,Eif3m
Activation of the mRNA upon binding of the cap-binding complex and eIFs, and subsequent binding to 43S	5.32946	0.00176194	Eif3f,Rps23,Rps21,Rps10,Eif2s2,Rps20,Rps27l,Rps13,Eif3h,Rps15a,Eif3k,Rps25,Eif4b,Rps9,Eif4g1,Eif3j1,Eif2s1,Eif3a,Eif4a1,Eif4a2,Eif4e,Eif4ebp1,Eif3e,Rpsa,Rps2,Pabpc1,Rps14,Rps15,Rps16,Rps17,Rps18,Rps19,Rps24,Rps29,Rps3a1,Rps4x,Rps5,Rps6,Rps7,Rps8,Eif3g,Rps28,Eif3i,Eif4h,Eif3d,Eif3c,Rps27,Eif2s3x,Rps3,Eif3l,Rps11,Rps26,Eif3b,Eif3m
Formation of a pool of free 40S subunits	5.96641	0.00176194	Eif3f,Rpl3l,Rps23,Rps21,Rpl15,Rpl36al,Rpl35,Rpl11,Rps10,Rpl14,Rplp2,Rpl37,Rps20,Rpl38,Rpl4,Rps27l,Rpl22l1,Rps13,Eif3h,Rpl39l,Rpl24,Rpl34,Rps15a,Rpl5,Rpl23a,Rpl12,Rpl13,Eif3k,Rps25,Rpl18a,Rps9,Rplp0,Rpl10,Eif3j1,Eif3a,Rpl31,Eif3e,Rpsa,Rps2,Rpl18,Rpl19,Rpl22,Rpl26,Rpl27,Rpl28,Rpl29,Rpl37a,Rpl36a,Rpl6,Rpl7,Rpl9,Rps14,Rps15,Rps16,Rps17,Rps18,Rps19,Rps24,Rps29,Rps3a1,Rps4x,Rps5,Rps6,Rps7,Rps8,Eif3g,Rp…
Formation of the ternary complex, and subsequently, the 43S complex	5.07417	0.00176194	Eif3f,Rps23,Rps21,Rps10,Eif2s2,Rps20,Rps27l,Rps13,Eif3h,Rps15a,Eif3k,Rps25,Rps9,Eif3j1,Eif2s1,Eif3a,Eif3e,Rpsa,Rps2,Rps14,Rps15,Rps16,Rps17,Rps18,Rps19,Rps24,Rps29,Rps3a1,Rps4x,Rps5,Rps6,Rps7,Rps8,Eif3g,Rps28,Eif3i,Eif3d,Eif3c,Rps27,Eif2s3x,Rps3,Eif3l,Rps11,Rps26,Eif3b,Eif3m
Ribosomal scanning and start codon recognition	5.27386	0.00176194	Eif3f,Rps23,Rps21,Rps10,Eif2s2,Rps20,Rps27l,Rps13,Eif3h,Rps15a,Eif3k,Rps25,Eif4b,Rps9,Eif4g1,Eif3j1,Eif2s1,Eif3a,Eif4a1,Eif4a2,Eif4e,Eif3e,Rpsa,Rps2,Rps14,Rps15,Rps16,Rps17,Rps18,Rps19,Rps24,Rps29,Rps3a1,Rps4x,Rps5,Rps6,Rps7,Rps8,Eif3g,Eif5,Rps28,Eif3i,Eif4h,Eif3d,Eif3c,Rps27,Eif2s3x,Rps3,Eif3l,Rps11,Rps26,Eif3b,Eif3m
GTP hydrolysis and joining of the 60S ribosomal subunit	6.09596	0.00176194	Eif3f,Rpl3l,Rps23,Rps21,Rpl15,Rpl36al,Rpl35,Rpl11,Rps10,Rpl14,Rplp2,Eif2s2,Rpl37,Rps20,Rpl38,Rpl4,Rps27l,Rpl22l1,Rps13,Eif3h,Rpl39l,Rpl24,Rpl34,Rps15a,Rpl5,Rpl23a,Rpl12,Rpl13,Eif3k,Rps25,Eif4b,Rpl18a,Rps9,Rplp0,Eif4g1,Rpl10,Eif3j1,Eif2s1,Eif3a,Eif4a1,Eif4a2,Eif4e,Rpl31,Eif3e,Rpsa,Rps2,Rpl18,Rpl19,Rpl22,Rpl26,Rpl27,Rpl28,Rpl29,Rpl37a,Rpl36a,Rpl6,Rpl7,Rpl9,Rps14,Rps15,Rps16,Rps17,Rps18,Rps19,Rps24,…
Cap-dependent Translation Initiation	5.95201	0.00176194	Eif3f,Rpl3l,Rps23,Rps21,Rpl15,Rpl36al,Rpl35,Rpl11,Rps10,Rpl14,Rplp2,Eif2s2,Rpl37,Rps20,Rpl38,Rpl4,Rps27l,Rpl22l1,Rps13,Eif3h,Rpl39l,Rpl24,Rpl34,Rps15a,Rpl5,Rpl23a,Rpl12,Rpl13,Eif3k,Eif2b3,Rps25,Eif4b,Rpl18a,Rps9,Rplp0,Eif4g1,Rpl10,Eif2b1,Eif3j1,Eif2s1,Eif2b4,Eif3a,Eif4a1,Eif4a2,Eif4e,Eif4ebp1,Rpl31,Eif3e,Rpsa,Rps2,Pabpc1,Rpl18,Rpl19,Rpl22,Rpl26,Rpl27,Rpl28,Rpl29,Rpl37a,Rpl36a,Rpl6,Rpl7,Rpl9,Rps14…
Translation	4.89884	0.00176194	Mrpl54,Aurkaip1,Eif3f,Chchd1,Mrps36,Mrpl4,Rpl3l,Mrpl35,Mrps28,Mrps16,Mrps17,Mrps26,Mrps21,Mrps15,Mrpl11,Mrpl20,Rps23,Rps21,Rpl15,Rpl36al,Rpl35,Mrpl51,Eef1d,Srp72,Mrpl33,Mrps18b,Rpl11,Mrpl45,Rps10,Rpl14,Eef1g,Rplp2,Eif2s2,Mrpl55,Mrpl42,Rpl37,Mrpl46,Rps20,Rpl38,Trmt112,Mrpl18,Mrpl24,N6amt1,Mrpl57,Mrrf,Rpl4,Ppa1,Rps27l,Rpl22l1,Rps13,Eif3h,Rpl39l,Rpl24,Rpl34,Mrpl14,Mrpl53,Mrpl13,Mrps18a,Mrpl58,Mrpl28…
RNA Polymerase I Promoter Opening	3.53197	0.00176194	H4c17,H2aj,H4c8,H2az2,H3f3a,H3f3b,H2ac18,H2ax,Mbd2,H2az1,H3c2,H4c11,H2ac10,H2bc11,H2bc3,H2bc21,Mapk3,H4c14,H3c1
Apoptotic execution phase	3.19931	0.00176194	Clspn,Dnm1l,Dsp,Add1,Birc2,Bmx,Casp3,Casp6,Casp7,Casp8,Ctnnb1,Cdh1,Dbnl,Dffa,Dsg2,Ptk2,Fnta,H1f3,H1f0,Hmgb1,H1f1,Kpnb1,Kpna1,Lmna,Lmnb1,Mapt,H1f2,Ocln,Prkcd,Pkp1,Plec,Rock1,Satb1,Tjp1,Tjp2,Vim,Acin1,H1f5,Stk24,Bcap31,Gsn,Hmgb2
Ubiquitin-dependent degradation of Cyclin D	2.63375	0.00176194	Psmd6,Psmd12,Psmd5,Psmc6,Psmd9,Psmd11,Psmd1,Psme4,Psmb11,Ccnd1,Cdk4,Rps27a,Psmb9,Psmb8,Psmd7,Psma2,Psma3,Psmb1,Psmb10,Psmb4,Psmb5,Psmb6,Psmb7,Psmc1,Psmc2,Psmc3,Psmc5,Psmd4,Psme1,Psme2,Psme3,Psmd10,Psmd2,Psmd3,Uba52,Ubb,Psmc4,Psmd13,Psmd8,Psmd14,Psma1,Psma4,Psma5,Psma6,Psma7,Psmb2,Psmb3,Psmf1
Platelet activation, signaling and aggregation	3.1734	0.00176194	Gng11,Abhd6,Nhlrc2,Ola1,Cdc37l1,Tmx3,Daglb,Chid1,Apool,P2ry12,Plcg2,Mmrn1,Qsox1,Dgkz,Rarres2,Pik3r6,Endod1,Cyb5r1,Brpf3,Dagla,Ly6g6f,Mpig6b,Serpina3f,Pik3cb,Spp2,Abcc4,Abhd12,Sccpdh,Pcyox1l,Arrb1,Actn1,Actg1,Adra2a,Adra2c,Rap1a,Akt1,Aldoa,Anxa5,Aplp2,Apoa1,Apoh,App,Rhoa,Raf1,Rhob,Dgkg,Dgkq,Serping1,Calm1,Calm2,Calm3,Cd36,Cd63,Cd9,Cdc42,Clu,Col1a1,Col1a2,Bcar1,Crk,Csk,Ctsw,Dgka,Gnat3,Lefty1,Ecm1,F…
Response to elevated platelet cytosolic Ca2+	3.04106	0.00176194	Nhlrc2,Ola1,Cdc37l1,Tmx3,Chid1,Apool,Mmrn1,Qsox1,Rarres2,Endod1,Cyb5r1,Brpf3,Ly6g6f,Serpina3f,Spp2,Abcc4,Sccpdh,Pcyox1l,Actn1,Actg1,Aldoa,Anxa5,Aplp2,Apoa1,Apoh,App,Serping1,Calm1,Calm2,Calm3,Cd36,Cd63,Cd9,Clu,Ctsw,Lefty1,Ecm1,Fn1,Gas6,Rab27b,Hgf,Maged2,Igf1,Igf2,Itga2b,Itgb3,Lamp2,Orm1,Orm2,Pdgfa,Pdgfb,Pecam1,Prkca,Lgals3bp,Srgn,Pros1,Psap,Tmsb4x,A1bg,Selp,Selenop,Sod1,Sparc,Serpina3g,Stx4a,Stxb…
Mitochondrial Fatty Acid Beta-Oxidation	2.71891	0.00176194	Acot13,Pccb,Hadhb,Decr1,Acot11,Acsf2,Acad11,Acot7,Ndufab1,Acad10,Acbd6,Mcee,Acot12,Them4,Mmaa,Acadl,Acadm,Acadvl,Acads,Pcca,Dbi,Eci1,Hadh,Mmut,Acaa2,Mecr,Mcat,Echs1,Hadha
Insulin receptor recycling	3.09737	0.00176194	Atp6v1f,Atp6v1g2,Atp6v1g1,Atp6v1c1,Atp6v1d,Atp6v1h,Atp6v0e2,Atp6v1a,Atp6v1b2,Atp6v0d1,Atp6v1e1,Atp6v0e,Atp6v0a1,Atp6v0c,Atp6v0b,Insr,Atp6ap1,Atp6v0a2,Tcirg1
Golgi-to-ER retrograde transport	3.17305	0.00176194	Rab3gap2,Cenpe,Tmed3,Arfgap3,Tmed7,Kdelr2,Use1,Tmed9,Dctn4,Kifc1,Tubb6,Dynll2,Kdelr1,Tmed10,Dctn2,Kif18b,Copb1,Dync1li2,Stx18,Nbas,Kif23,Dync1li1,Kif26b,Kdelr3,Tubb2b,Kif2c,Gbf1,Tubal3,Klc4,Napg,Napa,Galnt2,Rab1b,Kif20b,Bicd2,Arfgap2,Kif22,Arf1,Arf3,Arf4,Arf5,Bicd1,Capza2,Capzb,Copa,Kif26a,Kif15,Dctn1,Dync1h1,Dync1i2,Galnt1,Kif11,Kif13b,Kif16b,Kif1b,Kif1c,Kif2a,Kif21a,Kif21b,Kif3a,Kif3b,Kif3c,Kif…
Clathrin-mediated endocytosis	3.13334	0.00176194	Syt11,Necap2,Snx9,Gapvd1,Actr2,Ldlrap1,Cltc,Necap1,Gak,Arpc5,Arpc4,Ap2s1,Picalm,Ap2b1,Epgn,Aak1,Wasl,Trip10,Fcho1,Actr3,Apob,Cltb,Rab5a,Cops8,Ston2,Arpc2,Arrb1,Actb,Actg1,Ston1,Adrb2,Agtr1a,Ap2a1,Ap2a2,Ap2m1,Areg,Arf6,Grk2,Cbl,Scarb2,Cd3g,Cftr,Rps27a,Cops2,Cttn,Dab2,Dnm1,Dnm2,Dvl2,Egfr,Epn1,Epn2,Eps15,Eps15l1,Ereg,Fnbp1,Fzd4,Chrm2,Grb2,Pacsin3,Hbegf,Hgs,Agfg1,Hspa8,Igf2r,Il7r,Itsn1,Ldlr,M6pr,Nedd…
rRNA processing in the nucleus and cytosol	3.87154	0.00176194	Isg20l2,Utp3,Bud23,Nip7,Rpl3l,Nol6,Pno1,Exosc3,Exosc7,Rps23,Rps21,Rpl15,Rpl36al,Rpl35,Exosc1,Riok3,Rpl11,Riok2,Rps10,Rpl14,Nop56,Rplp2,Utp11,Eri1,Rpl37,Rps20,Nob1,Rpl38,Rpp21,Ddx47,Noc4l,Rpl4,Rps27l,Mphosph10,Rpl22l1,Rps13,Rpl39l,Rpl24,Rpl34,Mphosph6,Nol11,Ebna1bp2,Exosc8,Imp3,Rpp25,Rps15a,Ddx49,Rpl5,Riok1,Csnk1d,Rpl23a,Tsr1,Mtrex,Wdr43,Utp14a,Utp15,Rpl12,Dis3,Wdr3,Tex10,Rpl13,Wdr75,Fcf1,Nol9,Rrp…
Transcriptional regulation by RUNX3	2.80912	0.00176194	Smurf2,Snw1,Psmd6,Ep300,Psmd12,Psmd5,Psmc6,Psmd9,Psmd11,Psmd1,Maml1,Maml3,Maml2,Smurf1,Hdac4,Ctnnb1,Cbfb,Ccnd1,Rps27a,Brd2,Kat2a,Kras,Lef1,Psmb9,Psmb8,Smad3,Smad4,Mdm2,Psmd7,Notch1,Kat2b,Psma2,Psma3,Psmb1,Psmb10,Psmb4,Psmb5,Psmb6,Psmb7,Psmc1,Psmc2,Psmc3,Psmc5,Psmd4,Psme1,Psme2,Psme3,Rbpj,Psmd10,Src,Tcf7,Tcf7l2,Tead2,Tead3,Psmd2,Tgfb1,Trp53,Psmd3,Uba52,Ubb,Yap1,Psmc4,Psmd13,Psmd8,Psmd14,Psma1,Psma…
Transcriptional regulation by RUNX2	2.73512	0.00176194	Psmd6,Psmd12,Psmd5,Psmc6,Psmd9,Psmd11,Psmd1,Ccnb1,Runx2,Cbfb,Ccnd1,Cdk1,Cdk4,Rps27a,Psmb9,Psmb8,Smad1,Smad4,Psmd7,Psma2,Psma3,Psmb1,Psmb10,Psmb4,Psmb5,Psmb6,Psmb7,Psmc1,Psmc2,Psmc3,Psmc5,Psmd4,Psme1,Psme2,Psme3,Psmd10,Sox9,Ppm1d,Skp1,Psmd2,Psmd3,Uba52,Ubb,Stub1,Rbx1,Psmc4,Psmd13,Psmd8,Psmd14,Psma1,Psma4,Psma5,Psma6,Psma7,Psmb2,Psmb3,Cul1,Skp2,Psmf1
Transcriptional regulation by RUNX1	3.06839	0.00176194	Dpy30,Psmd6,Ep300,Ccnh,Smarcd3,Psmd12,Psmd5,Yaf2,Psmc6,Prmt6,Psmd9,Smarca2,H4c17,Smarcc2,H2aj,Psmd11,Kmt2e,Elf2,H4c8,Setd1a,Psmd1,Psme4,Hdac1,Psmb11,Wdr5,Kmt2b,Pcgf5,Arid1b,Abl1,Setd1b,Arid2,Serpinb13,H2az2,Bmi1,Cbfb,Cbx4,Ccnd1,Ccnd2,Ccnd3,Phc3,Cdk6,Cdk7,Rps27a,Csnk2a1,Csnk2a2,Csnk2b,Ctsk,Ctsl,Phc1,Elf1,Gata3,H3f3a,H3f3b,Hipk2,H2ac18,H2ax,Prmt1,Itch,Ldb1,Rbbp5,Lmo2,Psmb9,Psmb8,Mnat1,Psmd7,Smarcd1…
RUNX1 regulates genes involved in megakaryocyte differentiation and platelet function	2.86552	0.00176194	Dpy30,Ep300,Prmt6,H4c17,H2aj,Kmt2e,H4c8,Setd1a,Hdac1,Wdr5,Kmt2b,Setd1b,H2az2,Cbfb,H3f3a,H3f3b,H2ac18,H2ax,Prmt1,Rbbp5,Kat2b,H2az1,Sin3a,Sin3b,Zfpm1,Ash2l,H3c2,H4c11,H2ac10,H2bc11,H2bc3,H2bc21,H4c14,H3c1
ESR-mediated signaling	2.80986	0.00176194	Gng11,Polr2e,Ep300,Polr2l,Kdm1a,Polr2b,H4c17,Polr2g,Ppid,Zdhhc21,H2aj,Gtf2f2,Polr2d,H4c8,Zdhhc7,Polr2f,Polr2i,Xpo1,Gtf2a2,Epgn,Nrip1,Strn,Hdac1,Cdk9,Akt1,Akt2,Areg,Atf2,H2az2,Calm1,Calm2,Calm3,Cav1,Cbfb,Ccnt1,Cdkn1b,Creb1,Gnat3,S1pr3,Egfr,Ereg,Ptk2,Fkbp4,Fkbp5,Fos,Gata3,Gnai1,Gnai2,Gnai3,Gnb1,Gnb2,Gnb4,Gnb5,Gng10,Gng2,Gng4,Gng5,Gngt2,H3f3a,H3f3b,Hbegf,H2ac18,H2ax,Foxa1,Hras,Prmt1,Hspb1,Hsp90ab1,H…
Regulation of RUNX3 expression and activity	2.84038	0.00176194	Smurf2,Psmd6,Ep300,Psmd12,Psmd5,Psmc6,Psmd9,Psmd11,Psmd1,Smurf1,Cbfb,Rps27a,Psmb9,Psmb8,Mdm2,Psmd7,Psma2,Psma3,Psmb1,Psmb10,Psmb4,Psmb5,Psmb6,Psmb7,Psmc1,Psmc2,Psmc3,Psmc5,Psmd4,Psme1,Psme2,Psme3,Psmd10,Src,Psmd2,Tgfb1,Psmd3,Uba52,Ubb,Psmc4,Psmd13,Psmd8,Psmd14,Psma1,Psma4,Psma5,Psma6,Psma7,Psmb2,Psmb3,Psmf1
Cristae formation	3.68817	0.00176194	Atp5d,Atp5e,Atp5g2,Dmac2l,Atp5h,Atp5a1,Atp5b,Atp5c1,Atp5pb,Atp5g1,Atp5j,Atp5k,Atp5j2,Atp5l,Atp5o,Atp5g3
Post-translational protein phosphorylation	3.11428	0.00176194	Bpifb2,Fuca2,Pnpla2,Shisa5,Pcsk9,Eva1a,Apol11a,Qsox1,Pdia6,Apol9b,Ltbp1,Mgat4a,Golm1,Apob,Mxra8,Spp2,Apol8,Apol7a,Apol7c,Mia3,Prss23,Adam10,Amelx,Aplp2,Apoa1,Apoe,App,Fam20a,Bmp4,C3,C4b,Calu,Chgb,Cp,Csf1,Cst3,Sparcl1,Fbn1,Fn1,Fstl1,Gas6,Fam20c,Sdc2,Apol10a,Ccn1,Igfbp3,Igfbp4,Igfbp5,Il6,Itih2,Ktn1,Lamb1,Lamb2,Lgals1,Matn3,Men1,Mfge8,Fstl3,Nucb1,P4hb,Penk,Prkcsh,Proc,Ckap4,Rcn1,Scg2,Tnc,Hsp90b1,Trf…
Digestion and absorption	2.94316	0.00176194	Lipf,Mgam,Pir,Sis,Rsc1a1,Alpi,Clps,Cel,Guca2a,Guca2b,Gucy2c,Pnliprp1,Pnliprp2,Slc2a2,Slc5a1,Slc2a5,Lct
Plasma lipoprotein remodeling	2.83643	0.00176194	Lmf2,Apob,Lmf1,Abcg1,Apoa1,Apoa4,Apoc2,Apoc3,Apoe,Mttp,P4hb,Furin,Pcsk5,Pcsk6,Pltp,Angptl4
Fatty acid metabolism	2.95051	0.00176194	Hacd4,Cyp4a29,Acot13,Pccb,Hadhb,Decr1,Acot11,Mid1ip1,Pon2,Gpx4,Acsf2,Elovl5,Acad11,Cyp2c66,Acot7,Ndufab1,Cbr4,Hacd2,Acly,Cyp2u1,Acad10,Cyp4f18,Elovl6,Acbd6,Acot8,Acsl5,Acot4,Pon3,Mcee,Tecr,Crot,Acoxl,Ehhadh,Acot12,Acbd5,Acsl3,Cyp4f40,Morc2a,Elovl7,Acaca,Prkaa2,Prkag2,Cyp4a30b,Them4,Fads1,Mmaa,Acadl,Acadm,Acadvl,Acads,Acox1,Abcd1,Aldh3a2,Alox15,Alox5,Alox5ap,Cbr1,Pcca,Nudt19,Pecr,Cpt1a,Cpt1b,Cpt2,…
Triglyceride metabolism	3.12446	0.00176194	Dgat2,Mogat2,Fabp4,Dgat1,Fabp3,Fabp2,Fabp1,Lpin1,Gpd2,Gpam,Gk,Fabp6,Fabp5,Gpat2,Agmo,Lpin2,Lpin3
Signaling by Nuclear Receptors	2.41176	0.00176194	Rdh10,Gng11,Polr2e,Ep300,Polr2l,Kdm1a,Polr2b,H4c17,Polr2g,Ppid,Pdhb,Zdhhc21,Cyp26b1,H2aj,Gtf2f2,Polr2d,H4c8,Zdhhc7,Polr2f,Polr2i,Xpo1,Dlat,Gtf2a2,Epgn,Rdh14,Nrip1,Strn,Pdk3,Hdac1,Aldh8a1,Rdh1,Cdk9,Rdh13,Abca1,Adh1,Akt1,Akt2,Aldh1a1,Areg,Atf2,H2az2,Dhrs9,Calm1,Calm2,Calm3,Cav1,Cbfb,Ccnt1,Cdkn1b,Cpt1a,Cpt1b,Sdr16c5,Creb1,Cyp26a1,Dld,Gnat3,S1pr3,Egfr,Ereg,Ptk2,Fkbp4,Fkbp5,Fos,Gata3,Gnai1,Gnai2,Gnai3…
CDC42 GTPase cycle	2.33197	0.00176194	Lbr,Vangl1,Arfgap3,Lamtor1,Golga2,Plekhg3,Arhgef16,Arhgap24,Steap3,Wipf2,Plekhg2,Arhgap32,Arhgap35,Arap1,Arhgef10,Arhgap17,Pak4,Arhgap45,Arhgap26,Fmnl2,Arhgap21,Cdc42ep2,Arhgap42,Cdc42ep1,Dnmbp,Cdc42se2,Scrib,Wasl,Arap3,Arhgap22,Baiap2,Dock11,Dock8,Prex2,Iqgap3,Arfgap2,Abr,Arhgdib,Bcr,Daam1,Cav1,Cdc42,Arhgap31,Arhgap10,Gmip,Ect2,Dock10,Stom,Stard13,Sh3pxd2a,Fnbp1,Srgap2,Gna13,Prex1,Itsn1,Jup,Ktn1…
RHOG GTPase cycle	2.86928	0.00176194	Lbr,Vangl1,Arfgap3,Lamtor1,Plekhg3,Arhgef16,Ndufa5,Ndufs3,Dock1,Arhgap32,Dock5,Arhgap35,Garre1,Vrk2,Lman1,Pak4,Pgrmc2,Arhgap21,Cdc42ep1,Ankle2,Elmo2,Shmt2,Mpp7,Arhgdib,Cav1,Cdc42,Dsg2,Epha2,Prex1,Hspe1,Itgb1,Itsn1,Ktn1,Mcam,Pik3r1,Rab7,Stbd1,Lemd3,Cyfip1,Iqgap2,Kalrn,Arhgef5,Depdc1b,Tfrc,Vamp3,Vav1,Vav2,Rhog,Letm1,Stx5a,Ykt6,Diaph3,Esyt1,Erbin,Map3k11,Trio,Arhgap39,Pak2,Dock2,Ophn1,Arhgdia,Arhgap…
RHOBTB2 GTPase cycle	2.98192	0.00176194	Stk38,Msi2,Actn1,Actg1,Cct2,Cct6a,Cct7,Cdc37,Hnrnpc,Hsp90ab1,Hsp90aa1,Rhobtb2,Tmod3,Srrm1,Twf1,Rbmx,Tra2b,Txnl1,Ddx39b,Dbn1,Cul3
Estrogen-dependent gene expression	2.73532	0.00176194	Polr2e,Ep300,Polr2l,Kdm1a,Polr2b,H4c17,Polr2g,H2aj,Gtf2f2,Polr2d,H4c8,Polr2f,Polr2i,Gtf2a2,Nrip1,Hdac1,Cdk9,Atf2,H2az2,Cbfb,Ccnt1,Fkbp4,Fos,Gata3,H3f3a,H3f3b,H2ac18,H2ax,Foxa1,Prmt1,Hsp90ab1,Hsp90aa1,Kat5,Polr2h,Jun,Polr2k,Myc,Ncoa1,Ncoa2,Gtf2a1,Kat2b,Pou2f1,Med1,H2az1,Polr2a,Polr2c,Sp1,Tbp,Tle3,Usf2,Yy1,Ptges3,H3c2,H4c11,H2ac10,H2bc11,H2bc3,H2bc21,Carm1,Nr5a2,Kdm4b,H4c14,Zfp217,H3c1,Gtf2f1
Iron uptake and transport	3.10103	0.00176194	Atp6v1f,Atp6v1g2,Atp6v1g1,Atp6v1c1,Ftmt,Steap3,Cand1,Cybrd1,Atp6v1d,Steap2,Atp6v1h,Atp6v0e2,Aco1,Atp6v1a,Atp6v1b2,Atp6v0d1,Atp6v1e1,Atp6v0e,Atp6v0a1,Atp6v0c,Rps27a,Cp,Fbxl5,Fth1,Heph,Hfe,Hmox1,Hmox2,Atp6v0b,Nedd8,Slc11a2,Slc46a1,Slc40a1,Skp1,Atp6ap1,Atp6v0a2,Trf,Tfrc,Uba52,Ubb,Abcg2,Cul1,Tcirg1,Mcoln1,Flvcr1,Ireb2
Transferrin endocytosis and recycling	2.76013	0.00176194	Atp6v1f,Atp6v1g2,Atp6v1g1,Atp6v1c1,Steap3,Atp6v1d,Steap2,Atp6v1h,Atp6v0e2,Atp6v1a,Atp6v1b2,Atp6v0d1,Atp6v1e1,Atp6v0e,Atp6v0a1,Atp6v0c,Hfe,Atp6v0b,Atp6ap1,Atp6v0a2,Trf,Tfrc,Tcirg1,Mcoln1
Nonsense-Mediated Decay (NMD)	5.3661	0.00176194	Smg5,Rpl3l,Magohb,Rps23,Rps21,Rpl15,Rpl36al,Rpl35,Rpl11,Upf3a,Rps10,Rpl14,Rplp2,Rpl37,Rps20,Rpl38,Rpl4,Rps27l,Rpl22l1,Rps13,Ncbp2,Upf3b,Rpl39l,Rpl24,Rpl34,Smg1,Rps15a,Smg6,Rpl5,Rpl23a,Ppp2r2a,Smg9,Rpl12,Ncbp1,Rpl13,Smg8,Rps25,Dcp1a,Rpl18a,Rps9,Rplp0,Eif4g1,Rpl10,Gspt1,Rpl31,Rpsa,Rps2,Magoh,Pabpc1,Ppp2r1a,Ppp2ca,Upf1,Rnps1,Rpl18,Rpl19,Rpl22,Rpl26,Rpl27,Rpl28,Rpl29,Rpl37a,Rpl36a,Rpl6,Rpl7,Rpl9,Rps1…
Transport to the Golgi and subsequent modification	3.5538	0.00176194	0610009B22Rik,Tmed3,Trappc2,Arfgap3,Sar1b,Golga2,Tmed7,Trappc5,Lman2,Kdelr2,Sec24b,Man1c1,Trappc6a,Tbc1d20,Tmed9,Cog6,Mgat4c,Dctn4,Stx17,Ppp6c,Tubb6,Dynll2,Kdelr1,Tmed10,Chst8,Sec31a,Cog4,Sec24d,Dctn2,Cog7,Copb1,Lman1,Mgat4b,Dync1li2,Csnk1d,Fuca1,Dync1li1,Mgat4a,Ankrd28,Cnih3,Kdelr3,Tubb2b,Cog5,Gorasp1,Gbf1,Tubal3,Man2a2,Mgat5,Napg,Napa,Mia3,Rab1b,Cog2,Trappc9,Scfd1,Arfgap2,Sec24a,Areg,Arf1,Arf3,…
Protein localization	2.57655	0.00176194	Ube2d3,Fis1,Lonp2,Ndufb8,Nudt7,Atad1,Hscb,Pitrm1,Pex12,Pex1,Tysnd1,Coq2,Pex13,Acot8,Acot4,Pex26,Crot,Ehhadh,Acbd5,Ube2j2,Gstk1,Cyb5a,Acox1,Abcd1,Aldh3a2,App,Atp5b,Cat,Nudt19,Rps27a,Pex10,Pecr,Crat,Dao,Ephx2,Fxn,Gnpat,Hmgcl,Hmox1,Acox3,Hsd17b4,Hspd1,Paox,Idh1,Phyh,Amacr,Mpv17,Nos2,Otc,Pex11b,Pex16,Pex7,Ech1,Prnp,Pipox,Pex19,Abcd3,Pex5,Ube2d1,Sgta,Scp2,Sec61g,Slc25a17,Stx1a,Uba52,Ubb,Usp9x,Vamp2,Pe…
Autophagy	2.54707	0.00176194	Lamtor4,Tomm6,Tomm7,Chmp4c,Lamtor1,Ube2v1,Atg4b,Chmp3,Map1lc3a,Atg10,Wdr45b,Mfn1,Map1lc3b,Atg12,Atg3,Tubb6,Tomm20,Usp30,Dynll2,Atg101,Arl13b,Rraga,Tomm5,Lamtor5,Pink1,Chmp2b,Chmp2a,Atg14,Dync1li2,Atg4d,Dync1li1,Fundc1,Slc38a9,Mfn2,Pgam5,Chmp7,Prkaa1,Tubb2b,Atg7,Mtmr3,Tubal3,Wipi2,Prkaa2,Prkag2,Chmp4b,Pik3r4,Atg4a,Chmp6,Atg16l1,Atg5,Atm,Rb1cc1,Cftr,Rps27a,Csnk2a1,Csnk2a2,Csnk2b,Uvrag,Atg4c,Dync1h1…
Selective autophagy	3.00296	0.00176194	Tomm6,Tomm7,Ube2v1,Map1lc3a,Mfn1,Map1lc3b,Atg12,Tubb6,Tomm20,Usp30,Dynll2,Arl13b,Tomm5,Pink1,Dync1li2,Dync1li1,Fundc1,Mfn2,Pgam5,Tubb2b,Tubal3,Atg5,Atm,Cftr,Rps27a,Csnk2a1,Csnk2a2,Csnk2b,Dync1h1,Dync1i2,Hdac6,Nbr1,Sqstm1,Pcnt,Pex5,Tomm40,Src,Ift88,Tuba1a,Tuba1b,Tuba4a,Tubb3,Uba52,Ubb,Ulk1,Vdac1,Vim,Dynll1,Park7,Tomm22,Tomm70a,Ube2n,Tubb4b
Nervous system development	3.24129	0.00176194	Frs2,Psenen,Actr2,Cltc,Pdlim7,Arpc5,Plxnd1,Tubb6,Arpc4,Dock1,Arhgap35,Ap2s1,Itga9,Plxnb1,Ap2b1,Usp33,Rps6ka5,Wasl,Ephb1,Tubb2b,Actr3,Tubal3,Pik3cb,Col6a5,Arpc2,Abl1,Actb,Actg1,Aph1b,Ap2a1,Ap2a2,Ap2m1,Rhoa,Rhob,Rhoc,Arpc1b,Artn,Rap1gap,Arhgef28,Cdc42,Cdk5,Rps27a,Cxcr4,Col3a1,Col4a1,Col4a2,Col5a1,Col5a2,Col6a1,Col6a2,Creb1,Crmp1,Dpysl2,Csnk2a1,Csnk2a2,Csnk2b,Dab1,Dag1,Dnm1,Dnm2,Dok1,Dok2,Efna1,Efna…
RHOBTB GTPase Cycle	2.7952	0.00176194	Rhobtb1,Cpsf7,Stk38,Rnf20,Msi2,Actn1,Actg1,Cct2,Cct6a,Cct7,Cdc37,Pde5a,Cops2,Hnrnpc,Hsp90ab1,Hsp90aa1,Rhobtb2,Tmod3,Srrm1,Twf1,Rbbp6,Rbmx,Rock1,Rock2,Tra2b,Txnl1,Ddx39b,Vim,Dbn1,Spen,Cul3,Cops4
Cytoprotection by HMOX1	3.26505	0.00176194	Cox7b,Cox20,Cox14,Psmd6,Smarcd3,Psmd12,Psmd5,Psmc6,Psmd9,Cox18,Cox19,Psmd11,Blvrb,Cox11,Taco1,Psmd1,Psme4,Lrpprc,Psmb11,Chd9,Blvra,Bach1,Cox6b1,Rps27a,Cox4i1,Cox5a,Cox6a1,Cox7c,Cox8a,Cycs,Fabp1,H13,Hmox1,Hmox2,Tbl1xr1,Psmb9,Psmb8,Mafk,Abcc1,Psmd7,Ncoa1,Ncoa2,Fbxl17,Ndufa4,Nfe2l2,Keap1,Tgs1,Ppara,Med1,Psma2,Psma3,Psmb1,Psmb10,Psmb4,Psmb5,Psmb6,Psmb7,Psmc1,Psmc2,Psmc3,Psmc5,Psmd4,Psme1,Psme2,Psme3,…
Regulation of HMOX1 expression and activity	2.79448	0.00176194	Psmd6,Psmd12,Psmd5,Psmc6,Psmd9,Psmd11,Psmd1,Psme4,Psmb11,Bach1,Rps27a,H13,Hmox1,Psmb9,Psmb8,Mafk,Psmd7,Fbxl17,Nfe2l2,Keap1,Psma2,Psma3,Psmb1,Psmb10,Psmb4,Psmb5,Psmb6,Psmb7,Psmc1,Psmc2,Psmc3,Psmc5,Psmd4,Psme1,Psme2,Psme3,Psmd10,Skp1,Psmd2,Psmd3,Uba52,Ubb,Rbx1,Psmc4,Psmd13,Psmd8,Psmd14,Psma1,Psma4,Psma5,Psma6,Psma7,Psmb2,Psmb3,Cul3,Cul1,Skp2,Psmf1
Sensory Perception	-2.45228	0.00176194	Rdh10,Cyp4v3,Cngb1,Gpc2,Olfr78,Bco2,Ppef1,Camkmt,Apob,Rdh1,Plb1,Lrp12,Metap1,Clps,Apoa1,Apoa4,Apoc2,Apoc3,Apoe,Akr1b7,Dhrs9,Fntb,Calm1,Calm2,Calm3,Gnat3,Lrat,Fnta,Gnal,Gnb1,Gnb5,Gpc1,Gpc4,Guca1a,Gucy2e,Sdc2,Hspg2,Awat2,Gucy2f,Itpr3,Lrp1,Rdh11,Myo7a,Nmt1,Nmt2,Tas1r3,Olfr15,Olfr31,Olfr263,Pde6g,Rbp1,Rbp2,Rbp3,Rbp4,Rgs9,Rlbp1,Rpe65,Dhrs3,Sag,Scnn1a,Sdc1,Sdc3,Sdc4,Metap2,Gpc6,Tas2r108,Tas2r106,Hsd17b…
Cellular response to chemical stress	3.50793	0.00176194	Cox7b,Cox20,Cox14,Nudt2,Psmd6,Smarcd3,Psmd12,Psmd5,Psmc6,Psmd9,Cox18,Cox19,Psmd11,Blvrb,Cox11,Taco1,Psmd1,Psme4,Lrpprc,Psmb11,Chd9,Blvra,Prdx3,Prdx6,Bach1,Cox6b1,Cat,Ccs,Rps27a,Cox4i1,Cox5a,Cox6a1,Cox7c,Cox8a,Cyba,Cybb,Cycs,Fabp1,Gpx1,Gpx2,Gpx3,Gsr,Gstp1,H13,Hmox1,Hmox2,Tbl1xr1,Psmb9,Psmb8,Mafk,Abcc1,Psmd7,Nox4,Txnrd1,Ero1a,Ncf1,Ncf2,Ncoa1,Ncoa2,Fbxl17,Ndufa4,Nfe2l2,Keap1,P4hb,Prdx1,Tgs1,Ppara,Me…
Nonsense Mediated Decay (NMD) independent of the Exon Junction Complex (EJC)	5.7407	0.00176194	Rpl3l,Rps23,Rps21,Rpl15,Rpl36al,Rpl35,Rpl11,Rps10,Rpl14,Rplp2,Rpl37,Rps20,Rpl38,Rpl4,Rps27l,Rpl22l1,Rps13,Ncbp2,Rpl39l,Rpl24,Rpl34,Rps15a,Rpl5,Rpl23a,Rpl12,Ncbp1,Rpl13,Rps25,Rpl18a,Rps9,Rplp0,Eif4g1,Rpl10,Gspt1,Rpl31,Rpsa,Rps2,Pabpc1,Upf1,Rpl18,Rpl19,Rpl22,Rpl26,Rpl27,Rpl28,Rpl29,Rpl37a,Rpl36a,Rpl6,Rpl7,Rpl9,Rps14,Rps15,Rps16,Rps17,Rps18,Rps19,Rps24,Rps29,Rps3a1,Rps4x,Rps5,Rps6,Rps7,Rps8,Rps28,Rp…
Nonsense Mediated Decay (NMD) enhanced by the Exon Junction Complex (EJC)	5.3661	0.00176194	Smg5,Rpl3l,Magohb,Rps23,Rps21,Rpl15,Rpl36al,Rpl35,Rpl11,Upf3a,Rps10,Rpl14,Rplp2,Rpl37,Rps20,Rpl38,Rpl4,Rps27l,Rpl22l1,Rps13,Ncbp2,Upf3b,Rpl39l,Rpl24,Rpl34,Smg1,Rps15a,Smg6,Rpl5,Rpl23a,Ppp2r2a,Smg9,Rpl12,Ncbp1,Rpl13,Smg8,Rps25,Dcp1a,Rpl18a,Rps9,Rplp0,Eif4g1,Rpl10,Gspt1,Rpl31,Rpsa,Rps2,Magoh,Pabpc1,Ppp2r1a,Ppp2ca,Upf1,Rnps1,Rpl18,Rpl19,Rpl22,Rpl26,Rpl27,Rpl28,Rpl29,Rpl37a,Rpl36a,Rpl6,Rpl7,Rpl9,Rps1…
Antigen Presentation: Folding, assembly and peptide loading of class I MHC	2.91359	0.00176194	Sar1b,Sec24b,Sec31a,Sec24d,Sec24a,B2m,Sec13,H2-Q6,Calr,Canx,Gm8909,Pdia3,Hspa5,H2-K1,H2-M3,H2-M9,H2-Q1,H2-Q10,H2-T23,H2-T24,Erap1,Sec23a,Tap1,Tap2,Tapbp,Sec24c,Bcap31,Gm11127
Signaling by the B Cell Receptor (BCR)	2.79922	0.00176194	Psmd6,Psmd12,Psmd5,Psmc6,Psmd9,Psmd11,Psmd1,Psme4,Fbxw11,Plcg2,Psmb11,Card11,Rasgrp3,Malt1,Bcl10,Btk,Calm1,Calm2,Calm3,Cd22,Rps27a,Fkbp1a,Grb2,Ptpn6,Hras,Cd79b,Ikbkb,Ikbkg,Itpr1,Itpr2,Itpr3,Kras,Psmb9,Psmb8,Blnk,Lyn,Psmd7,Pik3ap1,Nck1,Nfatc2,Nfkb1,Nfkbia,Nfkbib,Pik3cd,Pik3r1,Ppp3ca,Ppp3cb,Ppp3r1,Psma2,Psma3,Psmb1,Psmb10,Psmb4,Psmb5,Psmb6,Psmb7,Psmc1,Psmc2,Psmc3,Psmc5,Psmd4,Psme1,Psme2,Psme3,Rela,…
Ion channel transport	2.4394	0.00176194	Atp1a2,Asph,Atp6v1f,Atp6v1g2,Atp6v1g1,Atp6v1c1,Clca4b,Atp2b1,Mcoln2,Wnk1,Trpm4,Ano1,Atp2c2,Atp1a3,Ano10,Tpcn2,Ano9,Atp2c1,Sgk3,Atp13a1,Pdzd11,Ano6,Atp6v1d,Mlkl,Atp13a2,Wwp1,Camk2d,Wnk2,Atp6v1h,Nalcn,Atp6v0e2,Atp11b,Sri,Ano7,Asic2,Asic4,Raf1,Atp1a1,Atp1b1,Atp1b2,Atp1b3,Atp2a1,Atp2a2,Atp2b2,Atp6v1a,Atp6v1b2,Atp6v0d1,Atp6v1e1,Atp6v0e,Atp6v0a1,Atp7a,Atp7b,Atp8a1,Atp9a,Atp10a,Atp6v0c,Atp8b4,Calm1,Calm…
RHO GTPase Effectors	3.26445	0.00177773	Cenpe,Ska2,Myl9,Cenpp,Spc25,Cenpm,Actr2,Dsn1,Nuf2,Abi2,Pmf1,Ndc80,Mis12,Pkn3,Nde1,Kdm1a,H4c17,Spc24,Itgb3bp,Arpc5,Myl12b,Tubb6,Zwilch,Arpc4,Dynll2,Ppp1r14a,Wipf2,Brk1,Sgo2a,H2aj,B9d2,H4c8,Prc1,Nup37,Nup43,Spdl1,Nup107,Xpo1,Dync1li2,Nup133,Fmnl2,Rhoq,Dync1li1,Cenpu,Noxo1,Myh14,Seh1l,Cenpn,Sgo1,Nckap1l,Wasl,Nup98,Tubb2b,Kif2c,Actr3,Tubal3,Klc4,Cdc20,Cenpf,Baiap2,Pik3r4,Ckap5,Rcc2,Tax1bp3,Clasp2,Pkn…
Asparagine N-linked glycosylation	3.37798	0.00177773	0610009B22Rik,Tmed3,Nudt14,Trappc2,Alg5,Arfgap3,Sar1b,Golga2,Tmed7,Trappc5,Alg14,Lman2,Kdelr2,Sec24b,Man1c1,Trappc6a,Tbc1d20,Nanp,Dhdds,Tmed9,Cog6,Mgat4c,Alg13,Dctn4,Stx17,Derl1,Ppp6c,Tubb6,Dynll2,Kdelr1,Dpm3,Tmed10,Chst8,Fuom,Sec31a,Cog4,Sec24d,Dctn2,Alg9,Cog7,Copb1,Lman1,Mgat4b,Dync1li2,Fcsk,Csnk1d,Fuca1,Slc17a5,Dync1li1,Mgat4a,Ankrd28,Vcp,Cnih3,Kdelr3,Tubb2b,Npl,Cog5,Gorasp1,Gbf1,Tubal3,Uap1,M…
MAPK family signaling cascades	2.69775	0.00177773	Frs2,Cdc14a,Psmd6,Psmd12,Psmd5,Psmc6,Psmd9,Dusp6,Wdr83,Spred3,Psmd11,Rasgrp4,Dab2ip,Abhd17c,Psmd1,Dusp16,Psme4,Xpo1,Septin7,Cdc42ep2,Dusp7,Epgn,Brap,Il17rd,Psmb11,Pik3cb,Camk2d,Syngap1,Rasgrp3,Dusp5,Arrb1,Actb,Actg1,Braf,Rap1a,Araf,Areg,Raf1,Artn,Bcl2l1,Zdhhc9,Fntb,Calm1,Calm2,Calm3,Camk2b,Camk2g,Ccnd3,Cdk1,Cdc42,Rps27a,Csf2ra,Csk,Dlg1,Dlg4,Egfr,Erbb2,Ereg,Ptk2,Fgf15,Fgf2,Fgf7,Fgf9,Fgfr1,Fgfr2,Fl…
Intracellular signaling by second messengers	2.3155	0.00177773	Phlpp1,Frs2,Gatad2b,Lamtor4,Psmd6,Lamtor1,Sall4,Wwp2,Psmd12,Psmd5,Psmc6,Psmd9,Akt1s1,Foxo6,Rnf146,Rraga,Lamtor5,Maf1,Psmd11,Irak4,Psmd1,Gatad2a,Psme4,Adcy3,Adcy4,Epgn,Adcy1,Slc38a9,Strn,Otud3,Hdac1,Psmb11,Tnks2,Pik3cb,Chd4,Pip4k2b,Them4,Camkk2,Prr5,Prex2,Adcy6,Adcy7,Adcy8,Adcy9,Il33,Akt1,Akt2,Xiap,Areg,Grk2,Bmi1,Calm1,Calm2,Calm3,Casp9,Cbx4,Cd86,Phc3,Cdkn1a,Cdkn1b,Rps27a,Creb1,Csnk2a1,Csnk2a2,Csn…
Antigen processing: Ubiquitination & Proteasome degradation	2.16789	0.00181461	Ubac1,Ube2d3,Anapc11,Smurf2,Anapc2,Psmd6,Cdc26,Cul7,Ube2v1,Uba5,Rnf220,Ube2w,Lrrc41,Psmd12,Psmd5,Fbxo44,Psmc6,Ube2g1,Herc6,Psmd9,Herc4,Ufl1,Uba6,Rnf41,Ube2r2,Elob,Fbxo32,Fbxo21,Rnf115,Ube2f,Eloc,Ube3c,Rchy1,Fbxl15,Arel1,Fbxl14,Ube2c,Fbxw9,Klhl42,Trim37,Asb11,Anapc10,Anapc13,Psmd11,Ubr4,Lrr1,Fbxo7,Trim32,Cdc16,Fbxl19,Ube2q1,Psmd1,Rnf126,Ube2v2,Psme4,Fbxw11,Kctd6,Blmh,Fbxo9,Herc1,Rnf217,Cul2,Klhl5,…
Developmental Biology	2.71112	0.00184898	Frs2,Lce1g,Psenen,Krtap3-2,Actr2,Krt20,Cltc,Pdlim7,Pkp2,Arpc5,Plxnd1,Gm11562,Tubb6,Arpc4,Dock1,1110025L11Rik,Klk5,Lce1b,Arhgap35,Ap2s1,Lipn,Spag9,Itga9,Krtap16-3,Kazn,Krtap16-1,Plxnb1,Ap2b1,Gm11568,Usp33,Krtap1-4,Rps6ka5,Wasl,Ephb1,Tubb2b,Actr3,Krt80,Tubal3,Pik3cb,Col6a5,Arpc2,Dsp,Abl1,Actb,Actg1,Adam11,Aph1b,Gm7138,Akt1,Akt2,Ap2a1,Ap2a2,Ap2m1,Rhoa,Rhob,Rhoc,Arpc1b,Artn,Gm7137,Krt7,Rap1gap,Bnip2,…
G alpha (i) signalling events	-1.9404	0.00184898	Gng11,Cxcl16,Gpsm1,P2ry12,Adcy3,Adcy4,Rgs12,Adcy1,Grm4,Gpr37l1,Gpsm3,P2ry13,Pde4d,P2ry14,Grm6,Oxgr1,Rxfp3,Gpr31b,Gpsm2,Camkk2,Adcy6,Adcy7,Adcy8,Adcy9,Adora1,Adra2a,Adra2c,App,Grk2,Bdkrb1,Bdkrb2,Pde4c,C3,C3ar1,C5ar1,Calm1,Calm2,Calm3,Npb,Cdk5,Chrm4,Rxfp4,Cxcr3,Cxcr4,Ccr1,Ccr9,Ccr4,Ccr5,Ccr8,Ccr10,Ackr3,Cort,Gabbr2,Cx3cr1,Gnat3,Opn3,S1pr3,Fpr2,Fpr-rs3,Fpr1,Chrm2,Gal,Gna11,Gna14,Gnai1,Gnai2,Gnai3,Gn…
Class I MHC mediated antigen processing & presentation	2.29569	0.00184898	Ubac1,Ube2d3,Anapc11,Smurf2,Anapc2,Sar1b,Psmd6,Cdc26,Cul7,Ube2v1,Uba5,Rnf220,Ube2w,Lrrc41,Sec24b,Psmd12,Psmd5,Fbxo44,Psmc6,Ube2g1,Herc6,Psmd9,Herc4,Ufl1,Uba6,Rnf41,Ube2r2,Elob,Fbxo32,Fbxo21,Rnf115,Ube2f,Eloc,Ube3c,Rchy1,Fbxl15,Arel1,Fbxl14,Ube2c,Fbxw9,Klhl42,Trim37,Asb11,Anapc10,Anapc13,Psmd11,Ubr4,Sec31a,Sec24d,Lrr1,Fbxo7,Trim32,Cdc16,Fbxl19,Ube2q1,Psmd1,Rnf126,Ube2v2,Psme4,Fbxw11,Kctd6,Blmh,Fbx…
Cytokine Signaling in Immune system	2.20041	0.00186914	Ube2d3,Ddx58,Psmd6,Tab1,Ifna13,Ube2v1,Eif4e3,Il22ra1,Psmd12,Psmd5,Eif4g3,Psmc6,Tnfrsf14,Psmd9,Peli1,Tnip2,Dusp6,Elob,Oasl1,Eloc,Ifnl2,Tab2,Vrk3,Psmd11,Gsdmd,Tnfsf13,Nkiras1,Mapkapk3,Irak4,Psmd1,Psme4,Fbxw11,Dusp7,Nkiras2,Tnfrsf13c,Dusp3,Rps6ka5,Il20ra,Psmb11,Irak3,Uba7,Il1rl2,Pik3cb,Nod1,Rapgef1,Camk2d,Cul5,Irak2,Il31,Il34,Txlna,Il33,Akt1,Akt2,Birc3,Birc2,App,Atf1,Atf2,Eif4g1,Camk2b,Camk2g,Casp1,…
Signaling by Receptor Tyrosine Kinases	2.99964	0.0019594	Frs2,Hnrnpf,Atp6v1f,Atp6v1g2,Shb,Atp6v1g1,Atp6v1c1,Psenen,Polr2e,Ep300,Polr2l,Abi2,Cltc,Polr2b,Rnf41,Dusp6,Polr2g,Ncbp2,Dock1,Brk1,Gtf2f2,Vrk3,Ap2s1,Polr2d,Polr2f,Mapkapk3,Polr2i,Flrt3,Dusp7,Ap2b1,Flrt2,Epgn,Dusp3,Fgfbp3,Nckap1l,Rps6ka5,Ncbp1,Hdac1,Atp6v1d,Ranbp10,Pik3cb,Wwp1,Rapgef1,Elmo2,Elmo1,Chd4,Col6a5,Baiap2,Pik3r4,Cul5,Them4,Atp6v1h,Atp6v0e2,Prr5,Abi1,Esrp1,Cyfip2,Memo1,Hnrnpm,Actb,Actg1,A…
RHO GTPase cycle	2.68743	0.00200605	Lbr,Frs2,Vangl1,Emc3,Gfod1,Maco1,Arfgap3,Arhgef39,Lamtor1,Golga2,Plekhg3,Wwp2,Baiap2l1,Rras2,Abi2,Arhgef16,Pkn3,Cltc,Arhgap24,Plxnd1,Taok3,Arl13b,Fam135a,Ndufa5,Ndufs3,Arhgap25,Fgd5,Steap3,Dock1,Wipf2,Brk1,Samm50,Plekhg2,Anln,Arhgap32,Ccp110,Dock5,Hint2,Arhgap35,Garre1,Rhobtb1,Arhgef18,Rhou,Picalm,Ccdc115,Arap1,Vrk2,Chn2,Kctd13,Arhgef10,Basp1,Lman1,Arhgap17,Pak4,Arhgap45,Pgrmc2,Potegl,Arhgap19,Dl…
Hemostasis	3.23964	0.00200803	Cenpe,Ppil2,Gng11,Abhd6,Nhlrc2,Ola1,Cdc37l1,Kdm1a,Pafah2,Mfn1,P2rx2,Kifc1,Tubb6,Atp2b1,Tmx3,Daglb,Chid1,Apool,Dock1,Slc7a6,Carmil1,Dock5,Cd177,Esam,Kif18b,P2ry12,Plcg2,Mmrn1,Qsox1,Dgkz,Rarres2,Ppia,Kif23,Pik3r6,Endod1,Cyb5r1,Brpf3,Mfn2,Dagla,Prcp,Kif26b,Ly6g6f,Hdac1,Jaml,Tubb2b,Kif2c,Mpig6b,Apob,Serpina3f,Tubal3,Klc4,Pik3cb,Rab5a,Olr1,Spp2,Abcc4,Dock11,Jmjd1c,Dock8,Abhd12,Sccpdh,Pcyox1l,Pde2a,Sri…
Neutrophil degranulation	4.07817	0.00204449	Defa34,Defa40,Defa41,Serpinb1a,Psmd6,Lamtor1,Serpinb3d,Ormdl3,Pgm2,Actr2,Pycard,Fuca2,Dsn1,Psmd12,Magt1,Cmtm6,Bpi,Snap29,Agpat2,Plac8,Aldh3b1,Tmem179b,Arpc5,Ilf2,Slc15a4,2310033P09Rik,1600012H06Rik,Npc2,Pdap1,Ndufc2,Rab14,Dera,Slc44a2,Arl8a,Mgam,Cd177,Psmd11,Ubr4,Gsdmd,Mcemp1,Siglecf,Dnase1l1,Bst2,Cdk13,Tmbim1,Plekho2,Tmem30a,Cpne1,Mettl7a1,Psmd1,Copb1,Unc13d,Atp6ap2,Cpne3,Arhgap45,AY761185,Qsox1…
Cellular responses to stress	3.64427	0.0020869	Sh3bp4,Lamtor4,Ube2d3,Cox7b,Atp6v1f,Anapc11,Atp6v1g2,Atp6v1g1,Atp6v1c1,Cox20,Cox14,Anapc2,Nudt2,Asf1a,Psmd6,Ep300,Cdc26,Lamtor1,Rps19bp1,Rae1,Szt2,Sesn2,Smarcd3,Psmd12,Psmd5,Psmc6,Psmd9,Nupl2,Eif2s2,Bag4,Fnip2,H4c17,Cox18,Akt1s1,Dctn4,Hikeshi,Elob,Eloc,Tubb6,Cox19,Dynll2,Hsbp1,Rpa3,Rpa1,Itfg2,Bmt2,Pot1a,Rraga,Lamtor5,H2aj,Ube2c,Wtip,Anapc10,Psmd11,Blvrb,H4c8,Nup35,Dctn2,Nup37,Cox11,Mapkapk3,Nup43…
Cellular responses to stimuli	3.62117	0.0020889	Sh3bp4,Lamtor4,Ube2d3,Cox7b,Atp6v1f,Anapc11,Atp6v1g2,Atp6v1g1,Atp6v1c1,Cox20,Cox14,Anapc2,Nudt2,Asf1a,Psmd6,Ep300,Cdc26,Lamtor1,Rps19bp1,Rae1,Szt2,Sesn2,Smarcd3,Psmd12,Psmd5,Psmc6,Psmd9,Nupl2,Eif2s2,Bag4,Fnip2,H4c17,Cox18,Akt1s1,Dctn4,Hikeshi,Elob,Eloc,Tubb6,Cox19,Dynll2,Hsbp1,Rpa3,Rpa1,Itfg2,Bmt2,Pot1a,Rraga,Lamtor5,H2aj,Ube2c,Wtip,Anapc10,Psmd11,Blvrb,H4c8,Nup35,Dctn2,Nup37,Cox11,Mapkapk3,Nup43…
Membrane Trafficking	3.23411	0.00215472	Syt11,Dennd4b,Rab3gap2,Cenpe,0610009B22Rik,Tmed3,Usp6nl,Necap2,Vta1,Trappc2,Arfgap3,Chmp4c,Sar1b,Sys1,Snx9,Golga2,Tmed7,Trappc5,Tbc1d15,Gapvd1,Chmp3,Actr2,Lman2,Plin3,Kdelr2,Sec24b,Vps28,Trappc13,Use1,Trappc6a,Dennd1b,Ubap1,Tbc1d20,Ldlrap1,Cltc,Map1lc3b,Snap29,Ap4b1,Tmed9,Cog6,Necap1,Dctn4,Stx17,Dennd4c,Gak,Arpc5,Rab39b,Snx2,Rab32,Ppp6c,Kifc1,Tubb6,Ccz1,Vps37b,Tbc1d14,Arpc4,Dynll2,Kdelr1,Vps53,Ra…
Metabolism of lipids	2.66585	0.00215472	Lbr,Pitpnm3,Sptssb,Acer3,Msmo1,Lpcat4,Osbpl6,Gba2,Pla2g12a,Stard7,Tnfaip8l1,Acer2,Crls1,Ormdl3,Acp6,Hacd4,Cyp4a29,Tafazzin,Acot13,Ormdl2,Pnpla2,Plbd1,Pccb,Cept1,Smarcd3,Oxct1,Pi4k2b,Mboat2,Hadhb,Cers4,Far1,Pnpla8,Decr1,Osbpl9,Agpat2,Samd8,Slc44a1,Gpat3,Aldh3b1,Acot11,Dgat2,Sumf2,Plpp3,Cert1,Mid1ip1,Pon2,Plekha8,Fdx2,Gpx4,Tmem86b,Agpat4,Acsf2,Far2,Rab14,Pmvk,Pcyt2,Slc44a2,Plekha1,Hsd3b7,Prkd2,Elov…
Vesicle-mediated transport	3.43949	0.00215472	Syt11,Dennd4b,Rab3gap2,Cenpe,0610009B22Rik,Tmed3,Usp6nl,Necap2,Vta1,Trappc2,Arfgap3,Chmp4c,Sar1b,Sys1,Snx9,Golga2,Tmed7,Trappc5,Tbc1d15,Gapvd1,Chmp3,Actr2,Lman2,Plin3,Kdelr2,Sec24b,Vps28,Trappc13,Use1,Trappc6a,Dennd1b,Ubap1,Tbc1d20,Ldlrap1,Cltc,Map1lc3b,Snap29,Ap4b1,Tmed9,Cog6,Necap1,Dctn4,Stx17,Dennd4c,Gak,Arpc5,Rab39b,Snx2,Rab32,Ppp6c,Kifc1,Tubb6,Ccz1,Vps37b,Tbc1d14,Arpc4,Dynll2,Kdelr1,Vps53,Ra…
Plasma lipoprotein assembly	2.74728	0.00215472	Sar1b,Apob,Abca1,Apoc4,Apoa1,Apoa4,Apoc1,Apoc2,Apoc3,Apoe,Bmp1,Mttp,P4hb,Prkaca,Prkacb,Zdhhc8
Transport of small molecules	2.45202	0.00215904	Slc41a1,Atp1a2,Slc35a3,Asph,Gng11,Atp6v1f,Atp6v1g2,Atp6v1g1,Aqp11,Atp6v1c1,Sar1b,Psmd6,Stoml2,Erlec1,Slc5a9,Mcub,Pmpca,Clca4b,Psmd12,Psmd5,Magt1,Psmc6,Psmd9,Eif2s2,Ldlrap1,Cltc,Pcsk9,Abcg8,Slc47a1,Slc25a26,Ftmt,Slc44a1,Lrrc8d,Slc38a2,Slc15a4,Derl1,Lrrc8c,Slc5a6,Npc2,Atp2b1,Maip1,Slc25a22,Mcoln2,Steap3,Wnk1,Micu2,Trpm4,Slc44a2,Slc7a6,Slco2b1,Slc9a9,Ano1,Smdt1,Atp2c2,Slc30a5,Ap2s1,Psmd11,Atp1a3,Afg…
Apoptotic cleavage of cellular proteins	2.61424	0.00225141	Clspn,Dsp,Add1,Birc2,Bmx,Casp3,Casp6,Casp7,Casp8,Ctnnb1,Cdh1,Dbnl,Dsg2,Ptk2,Fnta,Lmna,Lmnb1,Mapt,Ocln,Prkcd,Pkp1,Plec,Rock1,Satb1,Tjp1,Tjp2,Vim,Acin1,Stk24,Bcap31,Gsn
Regulated Necrosis	2.54804	0.00237778	Chmp4c,Chmp3,Peli1,Chmp2b,Chmp2a,Gsdmd,Tradd,Chmp7,Mlkl,Ogt,Chmp4b,Chmp6,Birc3,Birc2,Xiap,Bak1,Bax,Casp1,Casp4,Casp3,Casp8,Cdc37,Cflar,Rps27a,Cycs,Fadd,Fas,Flot1,Flot2,Gzmb,Hmgb1,Hsp90aa1,Il1a,Il1b,Pdcd6ip,Ripk1,Sdcbp,Tnfrsf10b,Gsdme,Traf2,Tnfsf10,Uba52,Ubb,Stub1,Ripk3
FBXL7 down-regulates AURKA during mitotic entry and in early mitosis	2.67258	0.00238485	Psmd6,Psmd12,Psmd5,Psmc6,Psmd9,Psmd11,Psmd1,Psme4,Psmb11,Rps27a,Psmb9,Psmb8,Psmd7,Psma2,Psma3,Psmb1,Psmb10,Psmb4,Psmb5,Psmb6,Psmb7,Psmc1,Psmc2,Psmc3,Psmc5,Psmd4,Psme1,Psme2,Psme3,Psmd10,Skp1,Psmd2,Psmd3,Uba52,Ubb,Rbx1,Psmc4,Psmd13,Psmd8,Psmd14,Psma1,Psma4,Psma5,Psma6,Psma7,Psmb2,Psmb3,Cul1,Psmf1
ROS sensing by NFE2L2	2.7041	0.00239427	Psmd6,Psmd12,Psmd5,Psmc6,Psmd9,Psmd11,Psmd1,Psme4,Psmb11,Rps27a,Psmb9,Psmb8,Psmd7,Nfe2l2,Keap1,Psma2,Psma3,Psmb1,Psmb10,Psmb4,Psmb5,Psmb6,Psmb7,Psmc1,Psmc2,Psmc3,Psmc5,Psmd4,Psme1,Psme2,Psme3,Psmd10,Psmd2,Psmd3,Uba52,Ubb,Rbx1,Psmc4,Psmd13,Psmd8,Psmd14,Psma1,Psma4,Psma5,Psma6,Psma7,Psmb2,Psmb3,Cul3,Psmf1
Degradation of GLI1 by the proteasome	2.72674	0.00239677	Psmd6,Psmd12,Psmd5,Psmc6,Psmd9,Psmd11,Psmd1,Psme4,Psmb11,Rps27a,Gli1,Itch,Psmb9,Psmb8,Psmd7,Numb,Psma2,Psma3,Psmb1,Psmb10,Psmb4,Psmb5,Psmb6,Psmb7,Psmc1,Psmc2,Psmc3,Psmc5,Psmd4,Psme1,Psme2,Psme3,Psmd10,Skp1,Psmd2,Psmd3,Uba52,Ubb,Rbx1,Psmc4,Psmd13,Sufu,Psmd8,Psmd14,Psma1,Psma4,Psma5,Psma6,Psma7,Psmb2,Psmb3,Cul1,Psmf1
GLI3 is processed to GLI3R by the proteasome	2.72108	0.00239677	Psmd6,Psmd12,Psmd5,Psmc6,Psmd9,Psmd11,Psmd1,Psme4,Psmb11,Rps27a,Psmb9,Psmb8,Psmd7,Prkaca,Prkacb,Psma2,Psma3,Psmb1,Psmb10,Psmb4,Psmb5,Psmb6,Psmb7,Psmc1,Psmc2,Psmc3,Psmc5,Psmd4,Psme1,Psme2,Psme3,Psmd10,Skp1,Psmd2,Psmd3,Uba52,Ubb,Rbx1,Gsk3b,Psmc4,Psmd13,Sufu,Psmd8,Psmd14,Psma1,Psma4,Psma5,Psma6,Psma7,Psmb2,Psmb3,Cul1,Psmf1
Oxygen-dependent proline hydroxylation of Hypoxia-inducible Factor Alpha	2.687	0.00241997	Ube2d3,Psmd6,Psmd12,Psmd5,Psmc6,Psmd9,Elob,Eloc,Wtip,Psmd11,Psmd1,Psme4,Cul2,Psmb11,Rps27a,Epas1,Egln1,Egln3,Egln2,Hif1a,Psmb9,Psmb8,Psmd7,Psma2,Psma3,Psmb1,Psmb10,Psmb4,Psmb5,Psmb6,Psmb7,Psmc1,Psmc2,Psmc3,Psmc5,Psmd4,Psme1,Psme2,Psme3,Ube2d1,Psmd10,Hif3a,Psmd2,Psmd3,Uba52,Ubb,Vhl,Rbx1,Ube2d2a,Psmc4,Psmd13,Psmd8,Psmd14,Psma1,Psma4,Psma5,Psma6,Psma7,Psmb2,Psmb3,Limd1,Psmf1
Cdc20:Phospho-APC/C mediated degradation of Cyclin A	2.55248	0.00247665	Anapc11,Anapc2,Psmd6,Cdc26,Psmd12,Psmd5,Psmc6,Psmd9,Ube2c,Anapc10,Psmd11,Cdc16,Psmd1,Psme4,Psmb11,Cdc20,Anapc15,Bub1b,Bub3,Ube2s,Cdk1,Rps27a,Psmb9,Psmb8,Anapc1,Psmd7,Psma2,Psma3,Psmb1,Psmb10,Psmb4,Psmb5,Psmb6,Psmb7,Psmc1,Psmc2,Psmc3,Psmc5,Psmd4,Psme1,Psme2,Psme3,Anapc4,Ube2d1,Cdc23,Anapc16,Psmd10,Cdc27,Psmd2,Psmd3,Uba52,Ubb,Ube2e1,Mad2l1,Anapc7,Psmc4,Psmd13,Psmd8,Anapc5,Psmd14,Psma1,Psma4,Psma5,P…
Activation of ATR in response to replication stress	-2.13437	0.00249097	Rpa3,Rpa1,Rfc3,Mcm10,Atrip,Rfc5,Clspn,Rfc4,Cdc25a,Cdc25c,Cdc45,Cdc7,Cdk2,Chek1,Hus1,Mcm3,Mcm2,Mcm4,Mcm5,Mcm6,Mcm7,Orc3,Orc1,Orc2,Rad1,Rad17,Rad9a,Rfc2,Cdc6,Orc4,Orc5,Dbf4
TCR signaling	2.47633	0.00256103	Psmd6,Ube2v1,Psmd12,Psmd5,Psmc6,Psmd9,Tab2,Psmd11,Psmd1,Psme4,Fbxw11,Plcg2,Cd101,Psmb11,Pik3cb,Card11,Malt1,Bcl10,Cd3e,Cd3g,Cd247,Rps27a,Csk,Ikbkb,Ikbkg,Inpp5d,Itk,Lat,Lck,Lcp2,Psmb9,Psmb8,Grap2,Psmd7,Nck1,Nfkb1,Nfkbia,Pdpk1,Pik3ca,Pik3r1,Pik3r2,Plcg1,Psma2,Psma3,Psmb1,Psmb10,Psmb4,Psmb5,Psmb6,Psmb7,Psmc1,Psmc2,Psmc3,Psmc5,Psmd4,Psme1,Psme2,Psme3,Pten,Ptprc,Ptprj,Ube2d1,Cdc34,Rela,Psmd10,Skp1,Psm…
RHOA GTPase cycle	2.28213	0.00275878	Lbr,Vangl1,Emc3,Maco1,Plekhg3,Pkn3,Arhgap24,Anln,Arhgap32,Arhgap35,Arhgef18,Ccdc115,Arap1,Arhgef10,Lman1,Arhgap45,Pgrmc2,Arhgap19,Arhgap26,Arhgap21,Arhgap42,Sowahc,Arhgef3,Arhgef40,Arhgap28,Arhgef10l,Arhgap8,Myo9a,Arhgap18,Acbd5,Arap3,Arhgap22,Akap13,Arhgef17,Prex2,Pkn2,Faf2,Scfd1,Actc1,Ddrgk1,Iqgap3,Abr,Rhoa,Arhgap6,Arhgdib,Bcr,Daam1,Arhgef28,Cav1,Arhgap31,Cit,Arhgap10,Gmip,Diaph1,Ect2,Stom,Star…
Neddylation	2.04714	0.00292615	Obsl1,Ube2d3,Commd4,Commd6,Commd5,Psmd6,Dda1,Cul7,Commd7,Cul4a,Lrrc41,Wdtc1,Psmd12,Psmd5,Fbxo44,Psmc6,Psmd9,Elob,Fbxo32,Fbxo21,Ube2f,Eloc,Dcun1d4,Fbxl15,Fbxl14,Fbxw9,Klhl42,Tulp4,Asb11,Psmd11,Commd10,Dcun1d2,Lrr1,Fbxo7,Dcun1d3,Fbxl19,Psmd1,Psme4,Fbxw11,Nae1,Kctd6,Fbxo9,Cul2,Klhl5,Dcaf7,Fbxo30,Btbd6,Cand1,Ercc8,Fbxo22,Fbxl20,Asb6,Cul4b,Fbxl4,Fbxo10,Fbxo4,Ccdc8,Dcaf4,Psmb11,Dcaf6,Fbxl22,Ankrd9,Spsb…
Spry regulation of FGF signaling	2.66718	0.00293083	Braf,Cbl,Rps27a,Grb2,Mknk1,Ppp2r1a,Ppp2ca,Ppp2cb,Ptpn11,Src,Uba52,Ubb,Spry2,Mapk1,Mapk3
TGF-beta receptor signaling activates SMADs	2.67763	0.00303141	Smurf2,Zfyve9,Bambi,Mtmr4,Cbl,Rps27a,Fkbp1a,Smad2,Smad3,Smad4,Smad7,Nedd8,Furin,Strap,Tgfb1,Tgfbr1,Tgfbr2,Uba52,Ubb,Ube2m,Stub1
Thrombin signalling through proteinase activated receptors (PARs)	2.5811	0.00303141	Gng11,Arrb1,F2r,F2rl2,Gna11,Gna12,Gna13,Gna14,Gnaq,Gnb1,Gnb2,Gnb4,Gnb5,Gng10,Gng2,Gng4,Gng5,Gngt2,Arrb2,Src,Mapk1,Mapk3,Gng13
Collagen chain trimerization	2.58441	0.00303141	Col23a1,Col16a1,Col26a1,Col6a5,Col11a2,Col12a1,Col13a1,Col14a1,Col15a1,Col18a1,Col3a1,Col4a1,Col4a2,Col5a1,Col5a2,Col6a1,Col6a2,Col1a1,Col1a2,Col27a1,Col5a3
RAS processing	2.6606	0.00303141	Abhd17c,Bcl2l1,Zdhhc9,Fntb,Calm1,Calm2,Calm3,Rps27a,Fnta,Hras,Kras,Pde6d,Lypla1,Abhd17a,Rce1,Uba52,Ubb,Arl2,Icmt,Golga7,Abhd17b
VEGFR2 mediated vascular permeability	2.54697	0.00303905	Them4,Prr5,Akt1,Akt2,Calm1,Calm2,Calm3,Ctnna1,Ctnnb1,Ctnnd1,Cav1,Cdh5,Rictor,Hsp90aa1,Jup,Nos3,Pdpk1,Rac1,Vav1,Vav2,Akt3,Mlst8,Mtor,Pak2,Mapkap1,Trib3
Plasma lipoprotein clearance	2.60613	0.00303905	Ldlrap1,Cltc,Pcsk9,Npc2,Ap2s1,Ap2b1,Apob,Apoc4,Ap2a1,Ap2a2,Ap2m1,Apoa1,Apoc1,Apoe,Hdlbp,Ldlr,Lipa,Npc1,Soat1,Scarb1,Mylip,Nr1h3,Nr1h2,Nceh1,Soat2
Aggrephagy	2.57998	0.00303905	Ube2v1,Tubb6,Dynll2,Arl13b,Dync1li2,Dync1li1,Tubb2b,Tubal3,Cftr,Rps27a,Dync1h1,Dync1i2,Hdac6,Pcnt,Ift88,Tuba1a,Tuba1b,Tuba4a,Tubb3,Uba52,Ubb,Vim,Dynll1,Park7,Ube2n,Tubb4b
Regulation of TP53 Activity through Acetylation	2.5124	0.00304937	Gatad2b,Ing5,Ep300,Ing2,Meaf6,Gatad2a,Brpf3,Hdac1,Chd4,Pip4k2b,Akt1,Akt2,Brpf1,Hdac2,Rbbp7,Mbd3,Pip4k2a,Pip4k2c,Pml,Rbbp4,Chd3,Trp53,Pip4p1,Akt3,Mta2,Pin1,Map2k6,Brd7,Brd1
Transcriptional Regulation by TP53	2.12072	0.00305289	Dna2,Gatad2b,Lamtor4,Cox7b,Ing5,Cox20,Cox14,Polr2e,Ep300,Taf12,Gtf2h5,Polr2l,Prelid1,Lamtor1,Ccnh,Sesn2,Taf13,Rffl,Polr2b,Cox18,Cnot6l,Ctdp1,Elob,Polr2g,Eloc,Kmt5a,Cox19,Rpa3,Rpa1,Steap3,Rraga,Lamtor5,Gtf2f2,Tmem219,Taf11,Cnot3,Triap1,Cnot8,Cdk12,Dyrk2,Polr2d,Ing2,Rfc3,Cdk13,Cox11,Polr2f,Polr2i,Meaf6,Taco1,Taf15,Gatad2a,Cnot1,Ppp1r13l,Topbp1,Atrip,Cnot6,Cnot2,Ccnb1,Slc38a9,Tpx2,Rfc5,Brpf3,Lrpprc,…
Cell junction organization	2.44944	0.00321667	Flnc,Parvb,Fblim1,Actn1,Actb,Actg1,Ang,Ctnna1,Ctnnb1,Ctnnd1,Cd151,Lims1,Cdh1,Cdh11,Cdh17,Cdh3,Cdh5,Cdh6,Ilk,Itga6,Itgb1,F11r,Jup,Krt14,Lama3,Lamb3,Afdn,Prkci,Plec,Nectin2,Pxn,Pvr,Tesk1,Vasp,Fermt2,Pard6a,Parva,Pard6b,Nectin1,Nectin3,Pard6g,Pard3,Flna,Lims2,Itgb4
Autodegradation of the E3 ubiquitin ligase COP1	2.54747	0.00322786	Psmd6,Psmd12,Psmd5,Psmc6,Psmd9,Psmd11,Psmd1,Psme4,Psmb11,Atm,Rps27a,Psmb9,Psmb8,Psmd7,Psma2,Psma3,Psmb1,Psmb10,Psmb4,Psmb5,Psmb6,Psmb7,Psmc1,Psmc2,Psmc3,Psmc5,Psmd4,Psme1,Psme2,Psme3,Psmd10,Psmd2,Trp53,Psmd3,Uba52,Ubb,Psmc4,Psmd13,Psmd8,Psmd14,Cop1,Psma1,Psma4,Psma5,Psma6,Psma7,Psmb2,Psmb3,Psmf1
Regulation of RUNX2 expression and activity	2.63946	0.00324224	Psmd6,Psmd12,Psmd5,Psmc6,Psmd9,Psmd11,Psmd1,Runx2,Rps27a,Psmb9,Psmb8,Psmd7,Psma2,Psma3,Psmb1,Psmb10,Psmb4,Psmb5,Psmb6,Psmb7,Psmc1,Psmc2,Psmc3,Psmc5,Psmd4,Psme1,Psme2,Psme3,Psmd10,Skp1,Psmd2,Psmd3,Uba52,Ubb,Stub1,Rbx1,Psmc4,Psmd13,Psmd8,Psmd14,Psma1,Psma4,Psma5,Psma6,Psma7,Psmb2,Psmb3,Cul1,Skp2,Psmf1
RNA Polymerase I Transcription	2.63896	0.00331413	Gatad2b,Polr1h,Polr2e,Gtf2h5,Polr2l,Ccnh,H4c17,H2aj,H4c8,Polr2f,Gatad2a,Hdac1,Rrn3,Chd4,Taf1d,Ehmt2,H2az2,Cdk7,Gtf2h3,Ercc2,Ercc3,Gtf2h1,H3f3a,H3f3b,Hdac2,H2ac18,H2ax,Rbbp7,Polr2h,Mbd2,Mbd3,Mnat1,Polr2k,Mta3,H2az1,Cavin1,Rbbp4,Polr1c,Polr1b,Polr1a,Chd3,Taf1a,Taf1b,Taf1c,Tbp,Ttf1,Gtf2h2,Mta2,H3c2,H4c11,H2ac10,H2bc11,H2bc3,H2bc21,Ercc6,Mapk3,Polr1f,H4c14,Polr1e,H3c1
Cargo recognition for clathrin-mediated endocytosis	2.31156	0.00349435	Syt11,Necap2,Ldlrap1,Cltc,Necap1,Ap2s1,Picalm,Ap2b1,Epgn,Aak1,Fcho1,Apob,Cltb,Cops8,Ston2,Arrb1,Ston1,Adrb2,Agtr1a,Ap2a1,Ap2a2,Ap2m1,Areg,Grk2,Cbl,Scarb2,Cd3g,Cftr,Rps27a,Cops2,Dab2,Dvl2,Egfr,Epn1,Epn2,Eps15,Eps15l1,Ereg,Fzd4,Chrm2,Grb2,Hbegf,Hgs,Igf2r,Il7r,Itsn1,Ldlr,M6pr,Nedd8,Reps1,Arrb2,Sh3gl2,Sh3gl1,Sh3gl3,Vamp4,Stam,Syt1,Tacr1,Tgfa,Ubqln2,Fcho2,Trf,Tfrc,Tgoln1,Uba52,Ubb,Vamp2,Vamp3,Vamp8,Wn…
Interleukin-1 signaling	2.26583	0.00352466	Psmd6,Tab1,Ube2v1,Psmd12,Psmd5,Psmc6,Psmd9,Peli1,Tnip2,Tab2,Psmd11,Nkiras1,Irak4,Psmd1,Psme4,Fbxw11,Nkiras2,Psmb11,Irak3,Nod1,Irak2,App,Rps27a,Hmgb1,Ikbkb,Ikbkg,Il1a,Il1b,Il1r1,Irak1,Il1rap,Il1rn,Psmb9,Psmb8,Psmd7,Myd88,Nfkb1,Nfkb2,Nfkbia,Nfkbib,Sqstm1,Psma2,Psma3,Psmb1,Psmb10,Psmb4,Psmb5,Psmb6,Psmb7,Psmc1,Psmc2,Psmc3,Psmc5,Psmd4,Psme1,Psme2,Psme3,Rela,S100b,Psmd10,Skp1,Tollip,Psmd2,Traf6,Psmd3,U…
Metabolism of nitric oxide: NOS3 activation and regulation	2.54907	0.00370077	Nosip,Nostrin,Zdhhc21,Ddah1,Wasl,Akt1,Calm1,Calm2,Calm3,Cav1,Dnm2,Hsp90aa1,Cygb,Nos3,Lypla1,Ddah2
HDR through Single Strand Annealing (SSA)	-2.16529	0.0040124	Dna2,Rpa3,Rpa1,Rfc3,Topbp1,Atrip,Rfc5,Rfc4,Rmi1,Abl1,Atm,Blm,Hus1,Kat5,Mre11a,Rad1,Rad17,Rad9a,Rfc2,Top3a,Wrn,Exo1,Nbn,Rmi2,Rbbp8
Regulation of ornithine decarboxylase (ODC)	2.42579	0.00418889	Psmd6,Psmd12,Psmd5,Psmc6,Psmd9,Psmd11,Psmd1,Psme4,Psmb11,Psmb9,Psmb8,Psmd7,Nqo1,Oaz1,Oaz2,Odc1,Psma2,Psma3,Psmb1,Psmb10,Psmb4,Psmb5,Psmb6,Psmb7,Psmc1,Psmc2,Psmc3,Psmc5,Psmd4,Psme1,Psme2,Psme3,Psmd10,Azin1,Psmd2,Psmd3,Psmc4,Psmd13,Psmd8,Psmd14,Psma1,Psma4,Psma5,Psma6,Psma7,Psmb2,Psmb3,Psmf1
Degradation of AXIN	2.56569	0.00419222	Smurf2,Psmd6,Psmd12,Psmd5,Psmc6,Psmd9,Rnf146,Psmd11,Psmd1,Psme4,Psmb11,Tnks2,Axin1,Axin2,Rps27a,Psmb9,Psmb8,Psmd7,Psma2,Psma3,Psmb1,Psmb10,Psmb4,Psmb5,Psmb6,Psmb7,Psmc1,Psmc2,Psmc3,Psmc5,Psmd4,Psme1,Psme2,Psme3,Psmd10,Psmd2,Tnks,Psmd3,Uba52,Ubb,Psmc4,Psmd13,Psmd8,Psmd14,Psma1,Psma4,Psma5,Psma6,Psma7,Psmb2,Psmb3,Psmf1
SCF(Skp2)-mediated degradation of p27/p21	2.46114	0.00420324	Psmd6,Psmd12,Psmd5,Psmc6,Psmd9,Psmd11,Psmd1,Ccnd1,Ccne1,Ccne2,Cdk2,Cdk4,Cdkn1a,Cdkn1b,Rps27a,Psmb9,Psmb8,Psmd7,Psma2,Psma3,Psmb1,Psmb10,Psmb4,Psmb5,Psmb6,Psmb7,Psmc1,Psmc2,Psmc3,Psmc5,Psmd4,Psme1,Psme2,Psme3,Ptk6,Psmd10,Cks1b,Skp1,Psmd2,Psmd3,Uba52,Ubb,Psmc4,Psmd13,Psmd8,Psmd14,Psma1,Psma4,Psma5,Psma6,Psma7,Psmb2,Psmb3,Cul1,Skp2,Psmf1
APC/C:Cdc20 mediated degradation of Securin	2.53759	0.0042609	Anapc11,Anapc2,Psmd6,Cdc26,Psmd12,Psmd5,Psmc6,Psmd9,Ube2c,Anapc10,Psmd11,Cdc16,Psmd1,Psme4,Psmb11,Cdc20,Anapc15,Ube2s,Rps27a,Psmb9,Psmb8,Anapc1,Psmd7,Psma2,Psma3,Psmb1,Psmb10,Psmb4,Psmb5,Psmb6,Psmb7,Psmc1,Psmc2,Psmc3,Psmc5,Psmd4,Psme1,Psme2,Psme3,Anapc4,Ube2d1,Cdc23,Anapc16,Psmd10,Cdc27,Psmd2,Psmd3,Uba52,Ubb,Ube2e1,Anapc7,Psmc4,Psmd13,Psmd8,Anapc5,Psmd14,Psma1,Psma4,Psma5,Psma6,Psma7,Psmb2,Psmb3,…
Regulation of PTEN stability and activity	2.60755	0.0042609	Psmd6,Wwp2,Psmd12,Psmd5,Psmc6,Psmd9,Rnf146,Psmd11,Psmd1,Psme4,Otud3,Psmb11,Tnks2,Prex2,Akt1,Akt2,Xiap,Rps27a,Csnk2a1,Csnk2a2,Csnk2b,Frk,Psmb9,Psmb8,Psmd7,Nedd4,Psma2,Psma3,Psmb1,Psmb10,Psmb4,Psmb5,Psmb6,Psmb7,Psmc1,Psmc2,Psmc3,Psmc5,Psmd4,Psme1,Psme2,Psme3,Pten,Trim27,Psmd10,Psmd2,Tnks,Psmd3,Uba52,Ubb,Stub1,Akt3,Psmc4,Psmd13,Psmd8,Psmd14,Psma1,Psma4,Psma5,Psma6,Psma7,Psmb2,Psmb3,Psmf1
Cyclin A:Cdk2-associated events at S phase entry	2.52167	0.00429956	Psmd6,Ccnh,Psmd12,Psmd5,Psmc6,Psmd9,Psmd11,Psmd1,Akt1,Akt2,Ccnd1,Ccne1,Ccne2,Cdc25a,Cdc25b,Cdk2,Cdk4,Cdk7,Cdkn1a,Cdkn1b,Rps27a,Psmb9,Psmb8,Mnat1,Psmd7,Psma2,Psma3,Psmb1,Psmb10,Psmb4,Psmb5,Psmb6,Psmb7,Psmc1,Psmc2,Psmc3,Psmc5,Psmd4,Psme1,Psme2,Psme3,Rb1,Ptk6,Psmd10,Cks1b,Skp1,Psmd2,Psmd3,Uba52,Ubb,Fzr1,Akt3,Psmc4,Psmd13,Psmd8,Psmd14,Psma1,Psma4,Psma5,Psma6,Psma7,Psmb2,Psmb3,Cul1,Skp2,Cables1,Psmf1
APC:Cdc20 mediated degradation of cell cycle proteins prior to satisfation of the cell cycle checkpoint	2.48699	0.00430841	Anapc11,Anapc2,Psmd6,Cdc26,Psmd12,Psmd5,Psmc6,Psmd9,Ube2c,Anapc10,Psmd11,Cdc16,Psmd1,Psme4,Psmb11,Cdc20,Anapc15,Bub1b,Bub3,Ube2s,Cdk1,Rps27a,Psmb9,Psmb8,Anapc1,Psmd7,Nek2,Psma2,Psma3,Psmb1,Psmb10,Psmb4,Psmb5,Psmb6,Psmb7,Psmc1,Psmc2,Psmc3,Psmc5,Psmd4,Psme1,Psme2,Psme3,Anapc4,Ube2d1,Cdc23,Anapc16,Psmd10,Cdc27,Psmd2,Psmd3,Uba52,Ubb,Ube2e1,Mad2l1,Anapc7,Psmc4,Psmd13,Psmd8,Anapc5,Psmd14,Psma1,Psma4,Ps…
Degradation of beta-catenin by the destruction complex	2.5001	0.00430841	Psmd6,Psmd12,Psmd5,Psmc6,Psmd9,Psmd11,Psmd1,Psme4,Amer1,Psmb11,Axin1,Ctnnb1,Rps27a,Ctbp1,Ctbp2,Frat1,Frat2,Lef1,Psmb9,Psmb8,Psmd7,Ppp2r1a,Ppp2ca,Ppp2cb,Psma2,Psma3,Psmb1,Psmb10,Psmb4,Psmb5,Psmb6,Psmb7,Psmc1,Psmc2,Psmc3,Psmc5,Psmd4,Psme1,Psme2,Psme3,Psmd10,Skp1,Tcf7,Tcf7l2,Psmd2,Tle1,Tle3,Tle4,Psmd3,Uba52,Ubb,Rbx1,Gsk3b,Psmc4,Psmd13,Psmd8,Psmd14,Psma1,Psma4,Psma5,Psma6,Psma7,Psmb2,Psmb3,Ppp2r5c,Pp…
Hedgehog 'on' state	2.41006	0.00434235	Smurf2,Psmd6,Dzip1,Psmd12,Psmd5,Psmc6,Psmd9,Evc2,Psmd11,Psmd1,Psme4,Gas8,Ulk3,Psmb11,Smurf1,Spopl,Arrb1,Gpr161,Grk2,Rps27a,Gas1,Gli1,Gli2,Hhip,Ihh,Itch,Kif3a,Psmb9,Psmb8,Psmd7,Cdc73,Numb,Psma2,Psma3,Psmb1,Psmb10,Psmb4,Psmb5,Psmb6,Psmb7,Psmc1,Psmc2,Psmc3,Psmc5,Psmd4,Psme1,Psme2,Psme3,Ptch1,Boc,Arrb2,Psmd10,Spop,Psmd2,Psmd3,Uba52,Ubb,Rbx1,Psmc4,Psmd13,Sufu,Psmd8,Smo,Cdon,Psmd14,Evc,Psma1,Psma4,Psma…
Post-translational modification: synthesis of GPI-anchored proteins	-2.05394	0.00465583	Pigl,Pigyl,Pigv,Pigc,Pigm,Pigk,Nrn1,Dpm3,Opcml,Spaca4,Lypd8,Pigw,Cpm,Nrn1l,Pigx,Psg21,Xpnpep2,Lypd1,Rtn4rl2,Ntng2,Pigg,Pigz,Ly6k,Plet1,Alpi,Alpl,Art3,Art4,Pgap1,Pigh,Bst1,Pigt,Dpm1,Dpm2,Pigs,Gpaa1,Pigq,Sprn,Ly6g6d,Psg25,Ly6d,Ly6e,Piga,Pigf,Plaur,Reck,Gm5155,Psg27,Thy1,Vnn1,Pigb,Msln,Pigp,Cd52,Prss21,Negr1,Psg19
HDR through Homologous Recombination (HRR)	-2.07408	0.00466741	Dna2,Pole4,Rpa3,Rpa1,Rfc3,Pold4,Mus81,Topbp1,Atrip,Rfc5,Rfc4,Rmi1,Slx1b,Atm,Blm,Brca2,Chek1,Gen1,Rps27a,Polh,Hus1,Kat5,Mre11a,Pcna,Pold1,Pold2,Pole,Pole2,Rad1,Rad17,Rad51b,Rad51d,Rad9a,Rfc1,Rfc2,Slx4,Top3a,Uba52,Ubb,Wrn,Pole3,Exo1,Polk,Nbn,Rmi2,Spidr,Rbbp8,Eme2
PKMTs methylate histone lysines	2.39139	0.00487598	Setd6,Dpy30,H4c17,Kmt5a,Kmt5c,Kmt2e,H4c8,Smyd3,Setd1a,Nsd3,Prdm16,Setd2,Setd7,Nsd2,Wdr5,Kmt2b,Setd1b,Aebp2,Dot1l,Ehmt2,Ehmt1,Eed,Mecom,Ezh2,Rbbp7,Rbbp5,Nfkb1,Nfkb2,Rbbp4,Rela,Suz12,Setd3,Suv39h1,Atf7ip,Ash2l,H3c2,H4c11,Ash1l,Kmt5b,Smyd2,H4c14,Suv39h2,H3c1
Positive epigenetic regulation of rRNA expression	2.39367	0.00488204	Polr1h,Polr2e,Ep300,Polr2l,H4c17,H2aj,H4c8,Polr2f,Taf1d,Actb,Dek,H2az2,Kat2a,H3f3a,H3f3b,H2ac18,H2ax,Polr2h,Polr2k,Myo1c,Mybbp1a,Kat2b,H2az1,Polr1c,Polr1b,Polr1a,Taf1a,Taf1b,Taf1c,Tbp,Baz1b,Ddx21,Gsk3b,H3c2,H4c11,H2ac10,H2bc11,H2bc3,H2bc21,Ercc6,Polr1f,Smarca5,H4c14,Polr1e,H3c1
B-WICH complex positively regulates rRNA expression	2.39367	0.00488204	Polr1h,Polr2e,Ep300,Polr2l,H4c17,H2aj,H4c8,Polr2f,Taf1d,Actb,Dek,H2az2,Kat2a,H3f3a,H3f3b,H2ac18,H2ax,Polr2h,Polr2k,Myo1c,Mybbp1a,Kat2b,H2az1,Polr1c,Polr1b,Polr1a,Taf1a,Taf1b,Taf1c,Tbp,Baz1b,Ddx21,Gsk3b,H3c2,H4c11,H2ac10,H2bc11,H2bc3,H2bc21,Ercc6,Polr1f,Smarca5,H4c14,Polr1e,H3c1
Cell-Cell communication	2.43271	0.00491457	Kirrel3,Flnc,Kirrel,Parvb,Wasl,Fblim1,Actn1,Actb,Actg1,Ang,Ctnna1,Ctnnb1,Ctnnd1,Cd151,Lims1,Cdh1,Cdh11,Cdh17,Cdh3,Cdh5,Cdh6,Fyn,Grb2,Ilk,Itga6,Itgb1,Cd47,F11r,Jup,Krt14,Lama3,Lamb3,Afdn,Nck1,Nck2,Prkci,Plec,Ptk2b,Sirpa,Nectin2,Pxn,Pvr,Sftpd,Gm5150,Skap2,Tesk1,Tyrobp,Vasp,Fermt2,Pard6a,Fyb,Parva,Pard6b,Nectin1,Nectin3,Pard6g,Pard3,Flna,Lims2,Itgb4,Iqgap1,Gm9733
Signaling by NTRKs	2.42163	0.00491457	Frs2,Cltc,Dusp6,Vrk3,Ap2s1,Mapkapk3,Dusp7,Ap2b1,Dusp3,Rps6ka5,Pik3cb,Rapgef1,Chd4,Braf,Rap1a,Ap2a1,Ap2a2,Ap2m1,Rhoa,Atf1,Kidins220,Creb1,Crk,Crkl,Fyn,Grb2,Hras,Irs1,Kras,Mapkapk2,Nab2,Ngf,Ntf3,Ntrk1,Ntrk3,Furin,Pcsk5,Pcsk6,Pik3ca,Pik3r1,Pik3r2,Plcg1,Ppp2r1a,Ppp2ca,Ppp2cb,Rac1,Shc2,Ralgds,Sgk1,Sh3gl2,Shc1,Shc3,Sos1,Src,Srf,Ywhab,Mapk7,Irs2,Dusp4,Map2k1,Map2k2,Mapk1,Mapk14,Mapk3
Epigenetic regulation of gene expression	2.46383	0.00491457	Polr1h,Polr2e,Ep300,Polr2l,H4c17,H2aj,H4c8,Polr2f,Taf1d,Actb,Aebp2,Dek,H2az2,Dnmt1,Dnmt3a,Eed,Ezh2,Kat2a,H3f3a,H3f3b,H2ac18,H2ax,Rbbp7,Polr2h,Jarid2,Mbd2,Polr2k,Mtf2,Myo1c,Mybbp1a,Kat2b,H2az1,Rbbp4,Suz12,Polr1c,Polr1b,Polr1a,Suv39h1,Taf1a,Taf1b,Taf1c,Tbp,Phf1,Tdg,Baz1b,Ddx21,Gsk3b,H3c2,H4c11,H2ac10,H2bc11,H2bc3,H2bc21,Ercc6,Polr1f,Sirt1,Smarca5,H4c14,Polr1e,H3c1
Dopamine Neurotransmitter Release Cycle	-2.06658	0.00491457	Ppfia2,Ppfia4,Ppfia1,Lin7a,Tspoap1,Ppfia3,Cask,Slc18a2,Rab3a,Stx1a,Stxbp1,Syt1,Unc13b,Vamp2,Lin7b,Lin7c,Apba1
Cyclin E associated events during G1/S transition	2.44871	0.00491457	Psmd6,Ccnh,Psmd12,Psmd5,Psmc6,Psmd9,Psmd11,Psmd1,Akt1,Akt2,Ccnd1,Ccne1,Ccne2,Cdc25a,Cdk2,Cdk4,Cdk7,Cdkn1a,Cdkn1b,Rps27a,Psmb9,Psmb8,Mnat1,Psmd7,Psma2,Psma3,Psmb1,Psmb10,Psmb4,Psmb5,Psmb6,Psmb7,Psmc1,Psmc2,Psmc3,Psmc5,Psmd4,Psme1,Psme2,Psme3,Rb1,Ptk6,Psmd10,Cks1b,Skp1,Psmd2,Psmd3,Uba52,Ubb,Akt3,Psmc4,Psmd13,Psmd8,Psmd14,Psma1,Psma4,Psma5,Psma6,Psma7,Psmb2,Psmb3,Cul1,Skp2,Cables1,Psmf1
RNA Polymerase I Promoter Clearance	2.55544	0.00491457	Gatad2b,Polr1h,Polr2e,Gtf2h5,Polr2l,Ccnh,H4c17,H2aj,H4c8,Polr2f,Gatad2a,Hdac1,Rrn3,Chd4,Taf1d,Ehmt2,H2az2,Cdk7,Gtf2h3,Ercc2,Ercc3,Gtf2h1,H3f3a,H3f3b,Hdac2,H2ac18,H2ax,Rbbp7,Polr2h,Mbd2,Mbd3,Mnat1,Polr2k,Mta3,H2az1,Rbbp4,Polr1c,Polr1b,Polr1a,Chd3,Taf1a,Taf1b,Taf1c,Tbp,Ttf1,Gtf2h2,Mta2,H3c2,H4c11,H2ac10,H2bc11,H2bc3,H2bc21,Ercc6,Mapk3,Polr1f,H4c14,Polr1e,H3c1
RNA Polymerase II Transcription Termination	2.39726	0.00491457	Sarnp,Clp1,Thoc7,Magohb,Chtop,Fip1l1,Snrpd3,Cstf1,Srsf6,Snrpg,Ncbp2,Upf3b,Sympk,Nudt21,Ddx39a,Srsf11,U2af1l4,Thoc2,Fyttd1,Snrpf,Zc3h11a,Cdc40,Lsm11,Cpsf7,Ncbp1,Thoc3,Poldip3,Wdr33,Pcf11,Thoc5,Srsf9,Cstf2,U2af1,Srsf1,Magoh,Cstf2t,Lsm10,Papola,Cpsf2,Srrm1,Rnps1,Srsf2,Srsf3,Srsf5,Slbp,Snrpb,Snrpe,Ddx39b,Cpsf4,Pabpn1,Alyref,Cpsf3,U2af2,Thoc6,Rbm8a,Casc3,Eif4a3,Srsf7,Thoc1,Cpsf1,Slu7,Dhx38,Cstf3
The role of GTSE1 in G2/M progression after G2 checkpoint	2.52621	0.00491457	Psmd6,Psmd12,Psmd5,Psmc6,Psmd9,Tubb6,Psmd11,Psmd1,Psme4,Ccnb1,Tubb2b,Psmb11,Tubal3,Ccnb2,Cdk1,Cdkn1a,Rps27a,Mapre1,Hsp90ab1,Hsp90aa1,Psmb9,Psmb8,Psmd7,Plk1,Psma2,Psma3,Psmb1,Psmb10,Psmb4,Psmb5,Psmb6,Psmb7,Psmc1,Psmc2,Psmc3,Psmc5,Psmd4,Psme1,Psme2,Psme3,Psmd10,Psmd2,Trp53,Psmd3,Tuba1a,Tuba1b,Tuba4a,Tubb3,Uba52,Ubb,Fkbpl,Psmc4,Psmd13,Psmd8,Psmd14,Psma1,Psma4,Psma5,Psma6,Psma7,Psmb2,Psmb3,Gtse1,Tubb…
RUNX1 regulates transcription of genes involved in differentiation of HSCs	2.45537	0.00491457	Psmd6,Ccnh,Psmd12,Psmd5,Psmc6,Psmd9,Psmd11,Psmd1,Psme4,Psmb11,Abl1,Cbfb,Cdk7,Rps27a,Gata3,Itch,Ldb1,Lmo2,Psmb9,Psmb8,Mnat1,Psmd7,Psma2,Psma3,Psmb1,Psmb10,Psmb4,Psmb5,Psmb6,Psmb7,Psmc1,Psmc2,Psmc3,Psmc5,Psmd4,Psme1,Psme2,Psme3,Psmd10,Tal1,Tcf12,Tcf3,Psmd2,Trp73,Psmd3,Uba52,Ubb,Yap1,Psmc4,Psmd13,Psmd8,Psmd14,Psma1,Psma4,Psma5,Psma6,Psma7,Psmb2,Psmb3,Psmf1
RHOC GTPase cycle	2.51786	0.00491457	Lbr,Vangl1,Maco1,Pkn3,Anln,Arhgap32,Arhgap35,Arhgef10,Lman1,Arhgap26,Fmnl2,Arhgap21,Arhgef40,Arhgef10l,Arhgap18,Acbd5,Akap13,Arhgef17,Pkn2,Iqgap3,Abr,Rhoa,Rhoc,Bcr,Daam1,Arhgef28,Cav1,Cit,Diaph1,Stom,Stard13,Flot1,Flot2,Prex1,Jup,Arhgef1,Arhgef11,Dlc1,Mcam,Pik3r1,Cavin1,Abcd3,Rock1,Rock2,Arhgef25,Rtkn,Stk10,Slk,Arhgef5,Tjp2,Depdc1b,Tfrc,Vamp3,Vav2,Fmnl3,Stx5a,Diaph3,Pkn1,Erbin,Racgap1,Arhgap39,Op…
APC/C:Cdh1 mediated degradation of Cdc20 and other APC/C:Cdh1 targeted proteins in late mitosis/early G1	2.40504	0.00495294	Anapc11,Anapc2,Psmd6,Cdc26,Psmd12,Psmd5,Psmc6,Psmd9,Ube2c,Anapc10,Psmd11,Cdc16,Psmd1,Psme4,Psmb11,Cdc20,Anapc15,Ube2s,Rps27a,Psmb9,Psmb8,Anapc1,Psmd7,Plk1,Psma2,Psma3,Psmb1,Psmb10,Psmb4,Psmb5,Psmb6,Psmb7,Psmc1,Psmc2,Psmc3,Psmc5,Psmd4,Psme1,Psme2,Psme3,Anapc4,Ube2d1,Rb1,Cdc23,Anapc16,Psmd10,Cdc27,Aurkb,Psmd2,Psmd3,Uba52,Ubb,Ube2e1,Anapc7,Fzr1,Psmc4,Psmd13,Psmd8,Anapc5,Psmd14,Psma1,Psma4,Psma5,Psma…
APC/C:Cdc20 mediated degradation of mitotic proteins	2.34135	0.00495294	Anapc11,Anapc2,Psmd6,Cdc26,Psmd12,Psmd5,Psmc6,Psmd9,Ube2c,Anapc10,Psmd11,Cdc16,Psmd1,Psme4,Ccnb1,Psmb11,Cdc20,Anapc15,Bub1b,Bub3,Ube2s,Cdk1,Rps27a,Psmb9,Psmb8,Anapc1,Psmd7,Nek2,Psma2,Psma3,Psmb1,Psmb10,Psmb4,Psmb5,Psmb6,Psmb7,Psmc1,Psmc2,Psmc3,Psmc5,Psmd4,Psme1,Psme2,Psme3,Anapc4,Ube2d1,Cdc23,Anapc16,Psmd10,Cdc27,Psmd2,Psmd3,Uba52,Ubb,Ube2e1,Mad2l1,Anapc7,Psmc4,Psmd13,Psmd8,Anapc5,Psmd14,Psma1,Ps…
Signaling by MET	2.36607	0.00495294	Ranbp10,Rapgef1,Rap1a,Arf6,Cbl,Rps27a,Col11a2,Col3a1,Col5a1,Col5a2,Col1a1,Col1a2,Crk,Crkl,Col27a1,Eps15,Ptk2,Fn1,Gab1,Grb2,Hgf,Hgs,Hras,Lrig1,Itga2,Itga3,Itgb1,Kras,Lama1,Lama2,Lama3,Lama4,Lama5,Lamb1,Lamb2,Lamb3,Usp8,Pik3ca,Pik3r1,Rap1b,Ptpn1,Ptpn11,Ptpn2,Ptprj,Rab4a,Rab4b,Rac1,Sh3gl2,Sh3gl1,Sh3gl3,Shc1,Tns4,Sos1,Spint1,Spint2,Src,Stam,Stat3,Col5a3,Hgfac,Uba52,Ubb,Stam2,Ranbp9,Tns3,Sh3kbp1,Muc20…
CDK-mediated phosphorylation and removal of Cdc6	2.41722	0.00495294	Anapc11,Anapc2,Psmd6,Cdc26,Psmd12,Psmd5,Psmc6,Psmd9,Ube2c,Anapc10,Psmd11,Cdc16,Psmd1,Psme4,Psmb11,Anapc15,Ube2s,Ccne1,Ccne2,Cdk2,Rps27a,Psmb9,Psmb8,Anapc1,Psmd7,Psma2,Psma3,Psmb1,Psmb10,Psmb4,Psmb5,Psmb6,Psmb7,Psmc1,Psmc2,Psmc3,Psmc5,Psmd4,Psme1,Psme2,Psme3,Anapc4,Ube2d1,Cdc23,Anapc16,Psmd10,Cdc27,Psmd2,Psmd3,Uba52,Ubb,Ube2e1,Anapc7,Fzr1,Cdc6,Psmc4,Psmd13,Psmd8,Anapc5,Psmd14,Psma1,Psma4,Psma5,Psm…
Chaperonin-mediated protein folding	2.46965	0.00510987	Gng11,Pdcl,Cct2,Cct3,Cct4,Cct5,Cct6a,Cct7,Cct8,Csnk2a1,Csnk2a2,Csnk2b,Gna11,Gna14,Gnaq,Gnb1,Gnb2,Gnb4,Gnb5,Gng10,Gng2,Gng4,Gng5,Gngt2,Rgs9,Tcp1,Gng13
Protein folding	2.46965	0.00510987	Gng11,Pdcl,Cct2,Cct3,Cct4,Cct5,Cct6a,Cct7,Cct8,Csnk2a1,Csnk2a2,Csnk2b,Gna11,Gna14,Gnaq,Gnb1,Gnb2,Gnb4,Gnb5,Gng10,Gng2,Gng4,Gng5,Gngt2,Rgs9,Tcp1,Gng13
Cooperation of PDCL (PhLP1) and TRiC/CCT in G-protein beta folding	2.46965	0.00510987	Gng11,Pdcl,Cct2,Cct3,Cct4,Cct5,Cct6a,Cct7,Cct8,Csnk2a1,Csnk2a2,Csnk2b,Gna11,Gna14,Gnaq,Gnb1,Gnb2,Gnb4,Gnb5,Gng10,Gng2,Gng4,Gng5,Gngt2,Rgs9,Tcp1,Gng13
TCF dependent signaling in response to WNT	2.04405	0.00543448	Smurf2,Psmd6,Ep300,Psmd12,Psmd5,Ctnnbip1,Psmc6,Psmd9,Chd8,Rnf146,Pygo2,Psmd11,Psmd1,Psme4,Xpo1,Leo1,Amer1,Rspo3,Hdac1,Cby1,Psmb11,Tnks2,Rspo2,Rnf43,Klhl12,Akt1,Akt2,Xiap,Axin1,Axin2,Bcl9,Ctnnb1,Cav1,Rps27a,Csnk2a1,Csnk2a2,Csnk2b,Ctbp1,Dkk1,Dvl1,Dvl2,Dvl3,Lgr5,Frat1,Fzd1,Fzd4,Fzd5,Fzd6,Fzd8,Znrf3,Bcl9l,Frat2,Igfals,Kat5,Lef1,Rbbp5,Psmb9,Psmb8,Lrp5,Lrp6,Men1,Psmd7,Usp34,Cdc73,Kremen1,Usp8,Pip5k1b,P…
Ubiquitin Mediated Degradation of Phosphorylated Cdc25A	2.39715	0.00543448	Psmd6,Psmd12,Psmd5,Psmc6,Psmd9,Psmd11,Psmd1,Psme4,Psmb11,Cdc25a,Chek1,Rps27a,Psmb9,Psmb8,Psmd7,Chek2,Psma2,Psma3,Psmb1,Psmb10,Psmb4,Psmb5,Psmb6,Psmb7,Psmc1,Psmc2,Psmc3,Psmc5,Psmd4,Psme1,Psme2,Psme3,Psmd10,Psmd2,Psmd3,Uba52,Ubb,Psmc4,Psmd13,Psmd8,Psmd14,Psma1,Psma4,Psma5,Psma6,Psma7,Psmb2,Psmb3,Psmf1
p53-Independent DNA Damage Response	2.39715	0.00543448	Psmd6,Psmd12,Psmd5,Psmc6,Psmd9,Psmd11,Psmd1,Psme4,Psmb11,Cdc25a,Chek1,Rps27a,Psmb9,Psmb8,Psmd7,Chek2,Psma2,Psma3,Psmb1,Psmb10,Psmb4,Psmb5,Psmb6,Psmb7,Psmc1,Psmc2,Psmc3,Psmc5,Psmd4,Psme1,Psme2,Psme3,Psmd10,Psmd2,Psmd3,Uba52,Ubb,Psmc4,Psmd13,Psmd8,Psmd14,Psma1,Psma4,Psma5,Psma6,Psma7,Psmb2,Psmb3,Psmf1
p53-Independent G1/S DNA damage checkpoint	2.39715	0.00543448	Psmd6,Psmd12,Psmd5,Psmc6,Psmd9,Psmd11,Psmd1,Psme4,Psmb11,Cdc25a,Chek1,Rps27a,Psmb9,Psmb8,Psmd7,Chek2,Psma2,Psma3,Psmb1,Psmb10,Psmb4,Psmb5,Psmb6,Psmb7,Psmc1,Psmc2,Psmc3,Psmc5,Psmd4,Psme1,Psme2,Psme3,Psmd10,Psmd2,Psmd3,Uba52,Ubb,Psmc4,Psmd13,Psmd8,Psmd14,Psma1,Psma4,Psma5,Psma6,Psma7,Psmb2,Psmb3,Psmf1
Signaling by NTRK1 (TRKA)	2.36564	0.00544805	Frs2,Cltc,Dusp6,Vrk3,Ap2s1,Mapkapk3,Dusp7,Ap2b1,Dusp3,Rps6ka5,Pik3cb,Rapgef1,Chd4,Braf,Rap1a,Ap2a1,Ap2a2,Ap2m1,Rhoa,Atf1,Kidins220,Creb1,Crk,Crkl,Grb2,Hras,Irs1,Kras,Mapkapk2,Nab2,Ngf,Ntrk1,Pik3ca,Pik3r1,Pik3r2,Ppp2r1a,Ppp2ca,Ppp2cb,Shc2,Ralgds,Sgk1,Sh3gl2,Shc1,Shc3,Sos1,Srf,Ywhab,Mapk7,Irs2,Dusp4,Map2k1,Map2k2,Mapk1,Mapk14,Mapk3
Degradation of DVL	2.45498	0.00544805	Psmd6,Psmd12,Psmd5,Psmc6,Psmd9,Psmd11,Psmd1,Psme4,Psmb11,Klhl12,Rps27a,Dvl1,Dvl2,Dvl3,Psmb9,Psmb8,Psmd7,Psma2,Psma3,Psmb1,Psmb10,Psmb4,Psmb5,Psmb6,Psmb7,Psmc1,Psmc2,Psmc3,Psmc5,Psmd4,Psme1,Psme2,Psme3,Psmd10,Psmd2,Psmd3,Uba52,Ubb,Rbx1,Psmc4,Psmd13,Psmd8,Psmd14,Psma1,Psma4,Psma5,Psma6,Psma7,Psmb2,Psmb3,Cul3,Psmf1
Stabilization of p53	2.44938	0.00544805	Psmd6,Psmd12,Psmd5,Psmc6,Psmd9,Psmd11,Psmd1,Psme4,Psmb11,Atm,Rps27a,Psmb9,Psmb8,Mdm2,Mdm4,Psmd7,Chek2,Psma2,Psma3,Psmb1,Psmb10,Psmb4,Psmb5,Psmb6,Psmb7,Psmc1,Psmc2,Psmc3,Psmc5,Psmd4,Psme1,Psme2,Psme3,Psmd10,Psmd2,Trp53,Psmd3,Uba52,Ubb,Psmc4,Psmd13,Psmd8,Psmd14,Cop1,Psma1,Psma4,Psma5,Psma6,Psma7,Psmb2,Psmb3,Psmf1,Phf20
mRNA 3'-end processing	2.38425	0.00544805	Sarnp,Clp1,Thoc7,Magohb,Chtop,Fip1l1,Cstf1,Srsf6,Ncbp2,Upf3b,Sympk,Nudt21,Ddx39a,Srsf11,U2af1l4,Thoc2,Fyttd1,Zc3h11a,Cdc40,Cpsf7,Ncbp1,Thoc3,Poldip3,Wdr33,Pcf11,Thoc5,Srsf9,Cstf2,U2af1,Srsf1,Magoh,Cstf2t,Papola,Cpsf2,Srrm1,Rnps1,Srsf2,Srsf3,Srsf5,Ddx39b,Cpsf4,Pabpn1,Alyref,Cpsf3,U2af2,Thoc6,Rbm8a,Casc3,Eif4a3,Srsf7,Thoc1,Cpsf1,Slu7,Dhx38,Cstf3
ER-Phagosome pathway	2.51	0.00561018	B2m,H2-Q6,Calr,Gm8909,Pdia3,H2-K1,H2-M3,H2-M9,H2-Q1,H2-Q10,H2-T23,H2-T24,Sec22b,Snap23,Stx4a,Tap1,Tap2,Tapbp,Vamp3,Vamp8,Gm11127
Activation of APC/C and APC/C:Cdc20 mediated degradation of mitotic proteins	2.30428	0.00568398	Anapc11,Anapc2,Psmd6,Cdc26,Psmd12,Psmd5,Psmc6,Psmd9,Ube2c,Anapc10,Psmd11,Cdc16,Psmd1,Psme4,Ccnb1,Psmb11,Cdc20,Anapc15,Bub1b,Bub3,Ube2s,Cdk1,Rps27a,Psmb9,Psmb8,Anapc1,Psmd7,Nek2,Plk1,Psma2,Psma3,Psmb1,Psmb10,Psmb4,Psmb5,Psmb6,Psmb7,Psmc1,Psmc2,Psmc3,Psmc5,Psmd4,Psme1,Psme2,Psme3,Anapc4,Ube2d1,Cdc23,Anapc16,Psmd10,Cdc27,Psmd2,Psmd3,Uba52,Ubb,Ube2e1,Mad2l1,Anapc7,Psmc4,Psmd13,Psmd8,Anapc5,Psmd14,Psm…
RAC2 GTPase cycle	2.30093	0.00569624	Lbr,Vangl1,Lamtor1,Baiap2l1,Abi2,Taok3,Dock1,Brk1,Samm50,Arhgap32,Arhgap35,Garre1,Vrk2,Lman1,Arhgap17,Pak4,Pgrmc2,Arhgap26,Arhgap21,Arhgap42,Cdc42ep1,Armcx3,Ankle2,Nckap1l,Mpp7,Abi1,Abr,Bcr,Cav1,Cdc42,Cyba,Cybb,Wasf2,Dsg2,Dock10,Epha2,Prex1,Itgb1,Ncf1,Ncf2,Nckap1,Mcam,Pik3ca,Pik3r1,Pik3r2,Pik3r3,Pld2,Rab7,Rac2,Stbd1,Lemd3,Git1,Cyfip1,Swap70,Depdc1b,Tfrc,Vamp3,Vav1,Vav2,Diaph3,Def6,Cdc42ep4,Esyt1,…
Factors involved in megakaryocyte development and platelet production	2.16721	0.00584774	Cenpe,Kdm1a,Mfn1,Kifc1,Tubb6,Dock1,Carmil1,Dock5,Kif18b,Kif23,Mfn2,Kif26b,Hdac1,Tubb2b,Kif2c,Tubal3,Klc4,Rab5a,Dock11,Jmjd1c,Dock8,Kif20b,Akap1,Kif22,Capza2,Capzb,Cbx5,Cdc42,Rbsn,Kif26a,Kif15,Ehd1,Dock10,Gata3,Gata4,Gata5,Gata6,H3f3a,H3f3b,Hdac2,Hmg20b,Jak2,Kif11,Kif13b,Kif16b,Kif1b,Kif1c,Kif2a,Kif21a,Kif21b,Kif3a,Kif3b,Kif3c,Kif5b,Kifap3,Sh2b3,Maff,Mafg,Mafk,Prkaca,Prkacb,Prkar1a,Prkar1b,Prkar2b…
DNA Replication Pre-Initiation	2.16663	0.00588486	Psmd6,Pole4,Psmd12,Psmd5,Psmc6,Psmd9,Cdt1,H4c17,Rpa3,Rpa1,H2aj,Psmd11,H4c8,Mcm10,Psmd1,Psme4,Psmb11,H2az2,Cdc45,Cdc7,Cdk2,Rps27a,E2f2,E2f3,H3f3a,H3f3b,H2ac18,H2ax,Kpnb1,Kpna1,Kpna6,Psmb9,Psmb8,Mcm3,Mcm2,Mcm4,Mcm5,Mcm6,Mcm7,Psmd7,Orc3,Orc1,Orc2,Pola1,Pola2,Pole,Pole2,H2az1,Psma2,Psma3,Psmb1,Psmb10,Psmb4,Psmb5,Psmb6,Psmb7,Psmc1,Psmc2,Psmc3,Psmc5,Psmd4,Psme1,Psme2,Psme3,Psmd10,Psmd2,Psmd3,Uba52,Ubb,…
Signaling by Hedgehog	2.11373	0.00611738	Smurf2,Psmd6,Dzip1,Erlec1,Psmd12,Psmd5,Psmc6,Psmd9,Ift172,Tubb6,Evc2,Psmd11,Psmd1,Fuz,Psme4,Adcy3,Adcy4,Gas8,Ulk3,Adcy1,Vcp,Ofd1,Ttc21b,Tubb2b,Ift140,Psmb11,Ift57,Smurf1,Spopl,Arrb1,Adcy6,Adcy7,Adcy8,Adcy9,Gpr161,Dync2h1,Grk2,Rps27a,Gas1,Gli1,Gli2,Hhip,Ihh,Ift122,Itch,Ift52,Kif3a,Psmb9,Psmb8,Psmd7,Disp2,Cdc73,Numb,P4hb,Derl2,Prkaca,Prkacb,Prkar1a,Prkar1b,Prkar2b,Psma2,Psma3,Psmb1,Psmb10,Psmb4,Psm…
Toll Like Receptor 3 (TLR3) Cascade	2.29284	0.00619504	Tab1,Ube2v1,Tnip2,Dusp6,Tab2,Vrk3,Nkiras1,Mapkapk3,Fbxw11,Dusp7,Nkiras2,Dusp3,Rps6ka5,Nod1,Irak2,App,Atf1,Atf2,Rps27a,Creb1,Fos,Hmgb1,Ikbkb,Ikbkg,Irak1,Jun,Mapkapk2,Nfkb1,Nfkb2,Nfkbia,Nfkbib,Ppp2r1a,Ppp2ca,Ppp2cb,Rela,S100b,Irf7,Irf3,Skp1,Traf6,Uba52,Ubb,Mapk7,Dusp4,Map2k3,Map2k4,Map2k6,Map2k7,Map3k7,Map3k8,Mapk1,Mapk10,Mapk14,Mapk3,Mapk8,Mapk9,Cul1,Ube2n,Ripk2
COPII-mediated vesicle transport	2.29471	0.00619504	0610009B22Rik,Trappc2,Sar1b,Golga2,Trappc5,Lman2,Sec24b,Trappc6a,Tbc1d20,Stx17,Ppp6c,Tmed10,Sec31a,Sec24d,Lman1,Csnk1d,Ankrd28,Cnih3,Gorasp1,Napg,Napa,Rab1b,Trappc9,Scfd1,Sec24a,Areg,Bet1,Sec13,Trappc6b,Cnih1,Ctsc,Ppp6r1,Trappc1,Napb,Preb,Nsf,Lman2l,Sec22c,Ppp6r3,Rab1a,Trappc10,Sec22b,Sec23a,Tfg,Tgfa,Sec24c,Sec22a,Uso1,Tmed2,Stx5a,Ykt6,Gosr2,Sec16b,Trappc2l,Trappc3,Trappc4,Mcfd2,Sec16a,Ctsz
Signal transduction by L1	2.46088	0.00619504	Itga9,Csnk2a1,Csnk2a2,Csnk2b,Egfr,Fgfr1,Itga2b,Itga5,Itgav,Itgb1,Itgb3,Ncam1,Nrp1,Rac1,Vav2,Map2k1,Map2k2,Mapk1,Mapk3
RHOB GTPase cycle	2.2958	0.00624332	Vangl1,Pkn3,Anln,Arhgap32,Arhgap35,Arhgef10,Arhgap26,Arhgap21,Sowahc,Arhgef3,Arhgef10l,Myo9a,Akap13,Arhgef17,Pkn2,Actc1,Iqgap3,Abr,Rhob,Bcr,Daam1,Arhgef28,Cav1,Cit,Diaph1,Ect2,Stom,Stard13,Flot1,Flot2,Prex1,Jup,Arhgef2,Arhgef1,Arhgef11,Dlc1,Mcam,Pik3r1,Pik3r2,Cavin1,Rhpn2,Rock1,Rock2,Arhgef25,Rtkn,Snap23,Stk10,Slk,Pcdh7,Arhgef5,Tjp2,Depdc1b,Tfrc,Vamp3,Vav2,Net1,Diaph3,Pkn1,Erbin,Racgap1,Arhgap39,…
Glutathione conjugation	2.40388	0.00638037	Cndp2,Mgst3,Chac2,Gstm7,Chac1,Ggt6,Oplah,Gstk1,Ggct,Esd,Ggt1,Gclc,Gclm,Gss,Gsta3,Gstm1,Gstm2,Gstm3,Gstm4,Gstm5,Gstm6,Gstp1,Gstt1,Gstt2,Gsto1,Gstz1,Mgst2,Hpgds,Mgst1,Ggt5,Akr1a1
Signaling by PTK6	2.34852	0.00652206	Lrrk2,Dock1,Arhgap35,Arap1,Sfpq,Stap2,Elmo2,Elmo1,Akt1,Rhoa,Cbl,Ccnd1,Ccne1,Cdk2,Cdk4,Cdkn1b,Socs3,Rps27a,Bcar1,Crk,Dok1,Egfr,Erbb2,Ereg,Khdrbs3,Hbegf,Hif1a,Hras,Kras,Ptpn1,Pxn,Rac1,Khdrbs1,Ptk6,Stat3,Rasa1,Uba52,Ubb
Signaling by Non-Receptor Tyrosine Kinases	2.34852	0.00652206	Lrrk2,Dock1,Arhgap35,Arap1,Sfpq,Stap2,Elmo2,Elmo1,Akt1,Rhoa,Cbl,Ccnd1,Ccne1,Cdk2,Cdk4,Cdkn1b,Socs3,Rps27a,Bcar1,Crk,Dok1,Egfr,Erbb2,Ereg,Khdrbs3,Hbegf,Hif1a,Hras,Kras,Ptpn1,Pxn,Rac1,Khdrbs1,Ptk6,Stat3,Rasa1,Uba52,Ubb
p53-Dependent G1 DNA Damage Response	2.28046	0.00691918	Psmd6,Psmd12,Psmd5,Psmc6,Psmd9,Psmd11,Psmd1,Psme4,Psmb11,Atm,Ccne1,Ccne2,Cdk2,Cdkn1a,Cdkn1b,Rps27a,Psmb9,Psmb8,Mdm2,Mdm4,Psmd7,Chek2,Psma2,Psma3,Psmb1,Psmb10,Psmb4,Psmb5,Psmb6,Psmb7,Psmc1,Psmc2,Psmc3,Psmc5,Psmd4,Psme1,Psme2,Psme3,Psmd10,Psmd2,Trp53,Psmd3,Uba52,Ubb,Psmc4,Psmd13,Psmd8,Psmd14,Cop1,Psma1,Psma4,Psma5,Psma6,Psma7,Psmb2,Psmb3,Zfp385a,Psmf1,Phf20
p53-Dependent G1/S DNA damage checkpoint	2.28046	0.00691918	Psmd6,Psmd12,Psmd5,Psmc6,Psmd9,Psmd11,Psmd1,Psme4,Psmb11,Atm,Ccne1,Ccne2,Cdk2,Cdkn1a,Cdkn1b,Rps27a,Psmb9,Psmb8,Mdm2,Mdm4,Psmd7,Chek2,Psma2,Psma3,Psmb1,Psmb10,Psmb4,Psmb5,Psmb6,Psmb7,Psmc1,Psmc2,Psmc3,Psmc5,Psmd4,Psme1,Psme2,Psme3,Psmd10,Psmd2,Trp53,Psmd3,Uba52,Ubb,Psmc4,Psmd13,Psmd8,Psmd14,Cop1,Psma1,Psma4,Psma5,Psma6,Psma7,Psmb2,Psmb3,Zfp385a,Psmf1,Phf20
G1/S DNA Damage Checkpoints	2.25198	0.00691918	Psmd6,Psmd12,Psmd5,Psmc6,Psmd9,Psmd11,Psmd1,Psme4,Psmb11,Atm,Ccne1,Ccne2,Cdc25a,Cdk2,Cdkn1a,Cdkn1b,Chek1,Rps27a,Psmb9,Psmb8,Mdm2,Mdm4,Psmd7,Chek2,Psma2,Psma3,Psmb1,Psmb10,Psmb4,Psmb5,Psmb6,Psmb7,Psmc1,Psmc2,Psmc3,Psmc5,Psmd4,Psme1,Psme2,Psme3,Psmd10,Psmd2,Trp53,Psmd3,Uba52,Ubb,Psmc4,Psmd13,Psmd8,Psmd14,Cop1,Psma1,Psma4,Psma5,Psma6,Psma7,Psmb2,Psmb3,Zfp385a,Psmf1,Phf20
Phase II - Conjugation of compounds	2.17113	0.00696549	Cndp2,Mgst3,Ugt1a1,Ugt1a7c,Ugt1a5,Trmt112,N6amt1,Ugt2b34,Chac2,Mat2a,Gstm7,Chac1,Sult1c2,Ggt6,Ahcy,Mtr,Glyatl3,Oplah,Mat2b,Slc35b3,Gstk1,Ggct,Comt,Bpnt2,Slc35d1,Mtrr,Slc26a2,Ugt2b35,Esd,Ggt1,Gclc,Gclm,Gss,Gsta3,Gstm1,Gstm2,Gstm3,Gstm4,Gstm5,Gstm6,Gstp1,Gstt1,Gstt2,Gsto1,Gstz1,Mgst2,Abhd10,Nat2,Nat3,Nnmt,Ugp2,Sult2b1,Hpgds,Tpmt,Tpst1,Tpst2,Ugdh,Sult1b1,Bpnt1,Mgst1,Ggt5,Papss1,Papss2,As3mt,Akr1a1,U…
Negative regulation of FGFR3 signaling	2.39533	0.0074265	Frs2,Braf,Cbl,Rps27a,Fgf2,Fgf9,Grb2,Mknk1,Ppp2r1a,Ppp2ca,Ppp2cb,Ptpn11,Src,Uba52,Ubb,Spry2,Mapk1,Mapk3
Negative regulation of FGFR2 signaling	2.41372	0.00747775	Frs2,Braf,Cbl,Rps27a,Fgf2,Fgf7,Fgf9,Fgfr2,Grb2,Mknk1,Ppp2r1a,Ppp2ca,Ppp2cb,Ptpn11,Src,Uba52,Ubb,Spry2,Mapk1,Mapk3
Signaling by TGF-beta Receptor Complex	2.32854	0.00753229	Ube2d3,Smurf2,Snw1,Zfyve9,Cdk8,Bambi,Arhgef18,E2f4,Mtmr4,Ccnt2,Hdac1,Cdk9,Smurf1,Rhoa,Cbl,Ccnt1,Rps27a,E2f5,Fkbp1a,F11r,Smad2,Smad3,Smad4,Smad7,Men1,Nedd8,Furin,Prkcz,Ppm1a,Ccnc,Ube2d1,Rbl1,Skil,Ncor2,Sp1,Strap,Tfdp1,Tgfb1,Tgfbr1,Tgfbr2,Tgif1,Uba52,Ubb,Ube2m,Usp9x,Stub1,Pard6a,Mapk1,Mapk3,Pard3,Rnf111,Trim33,Wwtr1,Tgif2
Collagen formation	2.28484	0.00756135	Loxl4,Pxdn,Colgalt1,Colgalt2,Col23a1,Col16a1,Col26a1,Col6a5,Pcolce2,Bmp1,Serpinh1,Cd151,Col11a2,Col12a1,Col13a1,Col14a1,Col15a1,Col18a1,Col3a1,Col4a1,Col4a2,Col5a1,Col5a2,Col6a1,Col6a2,Col1a1,Col1a2,Ctsb,Ctsl,Ctss,Col27a1,P3h2,Itga6,Lama3,Lamb3,Loxl1,Mmp13,Mmp3,Mmp9,P4ha1,P4ha2,P4hb,Pcolce,Plec,Plod1,Ppib,Adamts2,Col5a3,P3h1,Crtap,Tll2,Plod2,Plod3,Loxl2,Itgb4
Signaling by GPCR	-1.68885	0.00757967	Plppr4,Gng11,Abhd6,Cxcl16,Arhgef39,Prlh,Arhgef37,Ece1,Arhgef16,Lpar6,Nts,Taar3,Gpsm1,Daglb,Plekhg2,Ffar2,Ffar1,Ffar3,Arhgef18,P2ry6,Arhgef10,P2ry12,Adcy3,Adcy4,Dgkz,Arhgef3,Rgs12,Plxnb1,Pik3r6,Adcy1,Arhgef40,Grm4,Dagla,Arhgef10l,Gpr37l1,Gpsm3,P2ry13,Ffar4,Gpr68,Rxfp2,Pde4d,P2ry14,Grm5,Grm6,Oxgr1,Rxfp3,Akap13,Nln,Gpr31b,Gpsm2,Arhgef17,Abhd12,Camkk2,Pde2a,Arrb1,Adcy6,Adcy7,Adcy8,Adcy9,Adm,Adora1,Ad…
Processing of Capped Intron-Containing Pre-mRNA	1.85858	0.00766205	Hnrnpf,Sf3b6,Cwc15,Lsm7,Ppih,Sarnp,Sf3b5,Clp1,Thoc7,Snw1,Lsm5,Polr2e,Magohb,Polr2l,Chtop,Snrnp40,Snrnp27,Ctnnbl1,Rae1,Prpf38a,Rbm22,Crnkl1,Fip1l1,Zmat5,Zcrb1,Nupl2,Rnpc3,Cwc27,Snrpd3,Cstf1,Ppil4,Xab2,Sf3a1,Cwc25,Polr2b,Ccar1,Lsm3,Polr2g,Snrnp48,Puf60,U2surp,Srsf6,Snrpg,Bud31,Ncbp2,Upf3b,Bcas2,Sympk,Nudt21,Gcfc2,Ddx39a,Phf5a,Syf2,Dnajc8,Gtf2f2,Ppil1,Prpf6,Snrpa1,Prpf31,Hnrnpul1,Sf3b3,Dhx16,Srsf11,…
RMTs methylate histone arginines	2.32184	0.0078368	Coprs,Smarcd3,Prmt6,Smarca2,H4c17,Smarcc2,H2aj,H4c8,Wdr77,Prmt3,Wdr5,Arid1b,Arid2,Ccnd1,Cdk4,Dnmt3a,H2ac18,Prmt1,Rbbp7,Rps2,Prmt7,Smarcd1,Smarcd2,Smarca4,Smarcb1,Smarcc1,Actl6a,H3c2,H4c11,H2aw,H2ac10,Smarce1,Carm1,Prmt5,Arid1a,H4c14,H2ac21,H3c1
Signaling by ERBB2	2.29328	0.00785561	Rnf41,Cul5,Memo1,Akt1,Akt2,Rhoa,Cdc37,Rps27a,Diaph1,Egfr,Erbb2,Erbb3,Ereg,Fyn,Gab1,Grb2,Hbegf,Hras,Hsp90aa1,Kras,Matk,Usp8,Pik3ca,Pik3r1,Prkca,Prkcd,Prkce,Ptpn12,Ptpn18,Shc1,Ptk6,Sos1,Src,Uba52,Ubb,Yes1,Stub1,Akt3,Erbin
GPCR downstream signalling	-1.67718	0.00819069	Gng11,Abhd6,Cxcl16,Arhgef39,Arhgef37,Arhgef16,Lpar6,Nts,Taar3,Gpsm1,Daglb,Plekhg2,Ffar2,Ffar1,Ffar3,Arhgef18,P2ry6,Arhgef10,P2ry12,Adcy3,Adcy4,Dgkz,Arhgef3,Rgs12,Plxnb1,Pik3r6,Adcy1,Arhgef40,Grm4,Dagla,Arhgef10l,Gpr37l1,Gpsm3,P2ry13,Ffar4,Gpr68,Rxfp2,Pde4d,P2ry14,Grm5,Grm6,Oxgr1,Rxfp3,Akap13,Gpr31b,Gpsm2,Arhgef17,Abhd12,Camkk2,Pde2a,Arrb1,Adcy6,Adcy7,Adcy8,Adcy9,Adm,Adora1,Adora2a,Adora2b,Adra2a,…
Extra-nuclear estrogen signaling	2.24692	0.00820875	Gng11,Zdhhc21,Zdhhc7,Xpo1,Epgn,Strn,Akt1,Akt2,Areg,Calm1,Calm2,Calm3,Cav1,Cdkn1b,Creb1,Gnat3,S1pr3,Egfr,Ereg,Ptk2,Gnai1,Gnai2,Gnai3,Gnb1,Gnb2,Gnb4,Gnb5,Gng10,Gng2,Gng4,Gng5,Gngt2,Hbegf,Hras,Prmt1,Hspb1,Hsp90aa1,Igf1r,Uhmk1,Kras,Mmp2,Mmp3,Mmp9,Nos3,Pdpk1,Pik3ca,Pik3r1,Pik3r2,Pik3r3,Prkcz,Shc1,Src,Tgfa,Foxo3,Akt3,Mapk1,Gng13
Cell-extracellular matrix interactions	2.39131	0.00848092	Flnc,Parvb,Fblim1,Actn1,Actb,Actg1,Lims1,Ilk,Itgb1,Pxn,Tesk1,Vasp,Fermt2,Parva,Flna,Lims2
Inhibition of DNA recombination at telomere	2.36175	0.00866281	H4c17,Pot1a,H2aj,H4c8,Acd,H2az2,Daxx,H2ac18,H2ax,H2az1,Terf1,Terf2,Atrx,H4c11,H2ac10,H2bc11,H2bc3,H2bc21,Terf2ip,H4c14
Signaling by Insulin receptor	2.2344	0.00877459	Frs2,Atp6v1f,Atp6v1g2,Atp6v1g1,Atp6v1c1,Atp6v1d,Pik3cb,Pik3r4,Them4,Atp6v1h,Atp6v0e2,Akt2,Atp6v1a,Atp6v1b2,Atp6v0d1,Atp6v1e1,Atp6v0e,Atp6v0a1,Atp6v0c,Fgf15,Fgf2,Fgf7,Fgf9,Fgfr1,Fgfr2,Flt3l,Gab1,Grb10,Grb2,Atp6v0b,Insr,Tlr9,Irs1,Pde3b,Pdpk1,Pik3ca,Pik3r1,Pik3r2,Ptpn11,Shc1,Sos1,Atp6ap1,Atp6v0a2,Irs2,Mapk1,Mapk3,Tcirg1,Pik3c3,Trib3
RHOQ GTPase cycle	2.27855	0.00882424	Vangl1,Gfod1,Lamtor1,Plekhg3,Wwp2,Arl13b,Steap3,Arhgap32,Arhgap35,Arhgap17,Pak4,Arhgap26,Arhgap21,Rhoq,Cdc42ep2,Cdc42ep1,Scrib,Wasl,Trip10,Mpp7,Iqgap3,Cav1,Cdc42,Cftr,Stom,Fnbp1,Srgap2,Gja1,Prex1,Itsn1,Jup,Dlc1,Rab7,Git1,Snap23,Cdc42bpb,Arhgef7,Depdc1b,Tfrc,Vamp3,Diaph3,Cdc42ep4,Git2,Pak2,Ophn1,Gopc,Iqgap1,Cdc42bpa,Cdc42ep3,Arhgap1
Regulation of RAS by GAPs	2.17553	0.00907175	Psmd6,Psmd12,Psmd5,Psmc6,Psmd9,Spred3,Psmd11,Dab2ip,Psmd1,Psme4,Psmb11,Syngap1,Rps27a,Kbtbd7,Hras,Rasa2,Spred1,Spred2,Kras,Psmb9,Psmb8,Psmd7,Nf1,Psma2,Psma3,Psmb1,Psmb10,Psmb4,Psmb5,Psmb6,Psmb7,Psmc1,Psmc2,Psmc3,Psmc5,Psmd4,Psme1,Psme2,Psme3,Rasa3,Psmd10,Rasa4,Psmd2,Rasa1,Psmd3,Uba52,Ubb,Rbx1,Psmc4,Psmd13,Psmd8,Rasal3,Psmd14,Psma1,Psma4,Psma5,Psma6,Psma7,Psmb2,Psmb3,Cul3,Rasal2,Psmf1
Cargo concentration in the ER	2.38354	0.00929357	Sar1b,Lman2,Sec24b,Tmed10,Sec24d,Lman1,Cnih3,Mia3,Sec24a,Areg,Cnih1,Ctsc,Preb,Lman2l,Sec22b,Sec23a,Tgfa,Sec24c,Tmed2,Stx5a,Gosr2,Mcfd2,Ctsz
RNA Polymerase I Promoter Escape	2.24988	0.00929357	Polr1h,Polr2e,Gtf2h5,Polr2l,Ccnh,H4c17,H2aj,H4c8,Polr2f,Rrn3,Taf1d,H2az2,Cdk7,Gtf2h3,Ercc2,Ercc3,Gtf2h1,H3f3a,H3f3b,H2ac18,H2ax,Polr2h,Mnat1,Polr2k,H2az1,Polr1c,Polr1b,Polr1a,Taf1a,Taf1b,Taf1c,Tbp,Gtf2h2,H3c2,H4c11,H2ac10,H2bc11,H2bc3,H2bc21,Polr1f,H4c14,Polr1e,H3c1
MyD88-independent TLR4 cascade	2.1607	0.00941521	Ube2d3,Tab1,Ube2v1,Tnip2,Dusp6,Tab2,Vrk3,Nkiras1,Mapkapk3,Fbxw11,Dusp7,Nkiras2,Dusp3,Rps6ka5,Ticam1,Nod1,Irak2,Birc3,Birc2,App,Atf1,Atf2,Casp8,Cd14,Rps27a,Creb1,Fadd,Fos,Hmgb1,Ikbkb,Ikbkg,Irak1,Jun,Ly96,Mapkapk2,Nfkb1,Nfkb2,Nfkbia,Nfkbib,Ppp2r1a,Ppp2ca,Ppp2cb,Ptpn11,Ube2d1,Rela,Ripk1,S100b,Tank,Irf7,Irf3,Skp1,Tlr4,Traf3,Traf6,Uba52,Ubb,Tbk1,Ikbke,Ripk3,Ube2d2a,Mapk7,Dusp4,Map2k3,Map2k4,Map2k6,Map…
TRIF(TICAM1)-mediated TLR4 signaling	2.1607	0.00941521	Ube2d3,Tab1,Ube2v1,Tnip2,Dusp6,Tab2,Vrk3,Nkiras1,Mapkapk3,Fbxw11,Dusp7,Nkiras2,Dusp3,Rps6ka5,Ticam1,Nod1,Irak2,Birc3,Birc2,App,Atf1,Atf2,Casp8,Cd14,Rps27a,Creb1,Fadd,Fos,Hmgb1,Ikbkb,Ikbkg,Irak1,Jun,Ly96,Mapkapk2,Nfkb1,Nfkb2,Nfkbia,Nfkbib,Ppp2r1a,Ppp2ca,Ppp2cb,Ptpn11,Ube2d1,Rela,Ripk1,S100b,Tank,Irf7,Irf3,Skp1,Tlr4,Traf3,Traf6,Uba52,Ubb,Tbk1,Ikbke,Ripk3,Ube2d2a,Mapk7,Dusp4,Map2k3,Map2k4,Map2k6,Map…
Retinoid metabolism and transport	2.3735	0.0094682	Gpc2,Bco2,Apob,Plb1,Lrp12,Clps,Apoa1,Apoa4,Apoc2,Apoc3,Apoe,Akr1b7,Lrat,Gpc1,Gpc4,Sdc2,Hspg2,Lrp1,Rdh11,Rbp1,Rbp2,Rbp4,Sdc1,Sdc3,Sdc4,Gpc6,Bco1,Lrp10
RAC1 GTPase cycle	1.89098	0.00965206	Lbr,Vangl1,Arhgef39,Lamtor1,Plekhg3,Baiap2l1,Abi2,Arhgap24,Taok3,Arhgap25,Fgd5,Dock1,Wipf2,Brk1,Plekhg2,Arhgap32,Dock5,Arhgap35,Garre1,Arhgef18,Arap1,Vrk2,Chn2,Arhgef10,Arhgap17,Pak4,Arhgap45,Arhgap26,Arhgap21,Arhgap42,Cdc42ep1,Noxo1,Amigo2,Nckap1l,Wasl,Als2,Arap3,Arhgap22,Baiap2,Arhgap12,Mpp7,Dock11,Dock8,Prex2,Pkn2,Abi1,Cyfip2,Iqgap3,Abr,Arhgdib,Noxa1,Bcr,Cav1,Cdc42,Arhgap31,Cit,Arhgap10,Cyba,C…
Formation of Senescence-Associated Heterochromatin Foci (SAHF)	2.3375	0.00999814	Asf1a,Cabin1,Ubn1,Ep400,H1f3,H1f0,Hira,H1f1,Hmga1,Hmga2,Lmnb1,H1f2,Rb1,Trp53,H1f5
Interferon Signaling	2.22575	0.0101546	Ddx58,Ifna13,Eif4e3,Eif4g3,Oasl1,Uba7,Camk2d,Eif4g1,Camk2b,Camk2g,Socs3,Socs1,Ifna12,Eif4a1,Eif4a2,Eif4e,Eif4g2,Ifit1bl2,Ptpn6,Pde12,Ifna4,Ifnar1,Ifnar2,Ifnb1,Ifngr1,Ifngr2,Irf9,Jak2,Mx2,Nedd4,Prkcd,Plcg1,Ppm1b,Eif2ak2,Ptpn1,Ptpn11,Ptpn2,Trim25,Irf3,Tyk2,Ube2e1,Sumo1,Pias1,Arih1,Rnasel,Abce1,Ube2l6,Usp18,Flnb,Mapk3,Eif4e2,Ube2n,Eif4a3,Isg15
HATs acetylate histones	2.26911	0.0103519	Ing5,H4c17,Kat8,H4c8,Kansl2,Meaf6,Brpf3,Jade1,Msl1,Hat1,Wdr5,Ogt,Kansl1,Jade2,Atf2,Msl2,Brpf1,Hcfc1,Rbbp7,Msl3,Ncoa1,Ncoa2,Mcrs1,Kat7,Kat6b,Jade3,H3c2,H4c11,H2bc8,H2bc11,H2bc3,H2bc21,Brd1,Ing4,Kansl3,H4c14,Phf20,H3c1
Signaling by CSF3 (G-CSF)	2.33657	0.0104172	Ube2d3,Elob,Eloc,Cul5,Socs3,Socs1,Rps27a,Csf3r,Grb2,Hck,Jak2,Kras,Lyn,Ptpn11,Ube2d1,Rnf7,Shc1,Syk,Tyk2,Uba52,Ubb,Ube2d2a
Non-integrin membrane-ECM interactions	2.33878	0.0106678	Ddr1,Col11a2,Col3a1,Col4a1,Col4a2,Col5a1,Col5a2,Col1a1,Col1a2,Fgf2,Fn1,Sdc2,Hspg2,Itga2,Itga6,Itgav,Itgb1,Itgb3,Itgb5,Ddr2,Pdgfa,Pdgfb,Prkca,Sdc1,Sdc3,Sdc4,Col5a3,Tgfb1,Itgb4
LDL clearance	2.32806	0.0107079	Ldlrap1,Cltc,Pcsk9,Npc2,Ap2s1,Ap2b1,Apob,Ap2a1,Ap2a2,Ap2m1,Ldlr,Lipa,Npc1,Soat1,Nceh1,Soat2
Regulation of Complement cascade	2.28644	0.0107079	C7,C8b,Serping1,C1qa,C1qb,C1qc,C2,C3,C3ar1,C4b,C5ar1,Cd81,Cfh,Cfi,Clu,C1ra,Cfp
Adherens junctions interactions	2.36726	0.0107951	Actb,Actg1,Ang,Ctnna1,Ctnnb1,Ctnnd1,Cdh1,Cdh11,Cdh17,Cdh3,Cdh5,Cdh6,Jup,Afdn,Nectin2,Pvr,Nectin1,Nectin3
Signaling by ROBO receptors	2.31406	0.011036	Usp33,Abl1,Rhoa,Rps27a,Cxcr4,Dag1,Enah,Evl,Gpc1,Pfn1,Cxcl12,Slit3,Uba52,Ubb,Vasp
ISG15 antiviral mechanism	2.33664	0.0111488	Ddx58,Eif4e3,Eif4g3,Uba7,Eif4g1,Eif4a1,Eif4a2,Eif4e,Eif4g2,Ifit1bl2,Mx2,Nedd4,Plcg1,Ppm1b,Eif2ak2,Trim25,Irf3,Ube2e1,Arih1,Ube2l6,Usp18,Flnb,Mapk3,Eif4e2,Ube2n,Eif4a3,Isg15
Toll-like Receptor Cascades	1.97453	0.0113362	Ube2d3,Tab1,Ube2v1,Peli1,Tnip2,Bpi,Dusp6,Tab2,Vrk3,Gsdmd,Nkiras1,Mapkapk3,Fbxw11,Plcg2,Dusp7,Nkiras2,Cnpy3,Dusp3,Rps6ka5,Ticam1,Apob,Nod1,Pik3r4,Irak2,Birc3,Birc2,App,Atf1,Atf2,Casp8,Cd14,Cd36,Rbsn,Rps27a,Creb1,Ctsb,Ctsk,Ctsl,Ctss,Dnm1,Dnm2,Fadd,Fos,Hmgb1,Ikbkb,Ikbkg,Irak1,Tlr9,Itgb2,Jun,Lbp,Ly86,Ly96,Mapkapk2,Nfkb1,Nfkb2,Nfkbia,Nfkbib,Tirap,Ppp2r1a,Ppp2ca,Ppp2cb,Lgmn,Ptpn11,Ube2d1,Eea1,Rela,Ripk…
Negative regulation of FGFR4 signaling	2.33208	0.011393	Frs2,Braf,Cbl,Rps27a,Fgf15,Fgf2,Fgf9,Grb2,Mknk1,Ppp2r1a,Ppp2ca,Ppp2cb,Ptpn11,Src,Uba52,Ubb,Spry2,Mapk1,Mapk3
Antiviral mechanism by IFN-stimulated genes	2.31726	0.0118145	Ddx58,Eif4e3,Eif4g3,Oasl1,Uba7,Eif4g1,Eif4a1,Eif4a2,Eif4e,Eif4g2,Ifit1bl2,Pde12,Mx2,Nedd4,Plcg1,Ppm1b,Eif2ak2,Trim25,Irf3,Ube2e1,Arih1,Rnasel,Abce1,Ube2l6,Usp18,Flnb,Mapk3,Eif4e2,Ube2n,Eif4a3,Isg15
Toll Like Receptor 10 (TLR10) Cascade	2.12901	0.0121763	Tab1,Ube2v1,Peli1,Tnip2,Dusp6,Tab2,Vrk3,Nkiras1,Mapkapk3,Fbxw11,Dusp7,Nkiras2,Dusp3,Rps6ka5,Nod1,Irak2,App,Atf1,Atf2,Rps27a,Creb1,Fos,Hmgb1,Ikbkb,Ikbkg,Irak1,Jun,Mapkapk2,Nfkb1,Nfkb2,Nfkbia,Nfkbib,Ppp2r1a,Ppp2ca,Ppp2cb,Rela,S100b,Skp1,Traf6,Uba52,Ubb,Mapk7,Dusp4,Map2k3,Map2k4,Map2k6,Map2k7,Map3k7,Map3k8,Mapk1,Mapk10,Mapk14,Mapk3,Mapk8,Mapk9,Ecsit,Cul1,Ube2n,Peli2,Ripk2
Toll Like Receptor 5 (TLR5) Cascade	2.12901	0.0121763	Tab1,Ube2v1,Peli1,Tnip2,Dusp6,Tab2,Vrk3,Nkiras1,Mapkapk3,Fbxw11,Dusp7,Nkiras2,Dusp3,Rps6ka5,Nod1,Irak2,App,Atf1,Atf2,Rps27a,Creb1,Fos,Hmgb1,Ikbkb,Ikbkg,Irak1,Jun,Mapkapk2,Nfkb1,Nfkb2,Nfkbia,Nfkbib,Ppp2r1a,Ppp2ca,Ppp2cb,Rela,S100b,Skp1,Traf6,Uba52,Ubb,Mapk7,Dusp4,Map2k3,Map2k4,Map2k6,Map2k7,Map3k7,Map3k8,Mapk1,Mapk10,Mapk14,Mapk3,Mapk8,Mapk9,Ecsit,Cul1,Ube2n,Peli2,Ripk2
Norepinephrine Neurotransmitter Release Cycle	-1.8998	0.0121763	Ppfia2,Ppfia4,Ppfia1,Tspoap1,Ppfia3,Maoa,Slc18a2,Rab3a,Slc22a1,Slc22a2,Stx1a,Stxbp1,Syt1,Unc13b,Vamp2
MyD88 cascade initiated on plasma membrane	2.12901	0.0121763	Tab1,Ube2v1,Peli1,Tnip2,Dusp6,Tab2,Vrk3,Nkiras1,Mapkapk3,Fbxw11,Dusp7,Nkiras2,Dusp3,Rps6ka5,Nod1,Irak2,App,Atf1,Atf2,Rps27a,Creb1,Fos,Hmgb1,Ikbkb,Ikbkg,Irak1,Jun,Mapkapk2,Nfkb1,Nfkb2,Nfkbia,Nfkbib,Ppp2r1a,Ppp2ca,Ppp2cb,Rela,S100b,Skp1,Traf6,Uba52,Ubb,Mapk7,Dusp4,Map2k3,Map2k4,Map2k6,Map2k7,Map3k7,Map3k8,Mapk1,Mapk10,Mapk14,Mapk3,Mapk8,Mapk9,Ecsit,Cul1,Ube2n,Peli2,Ripk2
Negative regulation of FGFR1 signaling	2.31857	0.0124916	Frs2,Braf,Cbl,Rps27a,Fgf2,Fgf9,Fgfr1,Grb2,Mknk1,Ppp2r1a,Ppp2ca,Ppp2cb,Ptpn11,Src,Uba52,Ubb,Spry2,Mapk1,Mapk3
APC/C-mediated degradation of cell cycle proteins	2.05775	0.0126186	Cdc14a,Anapc11,Anapc2,Psmd6,Cdc26,Psmd12,Psmd5,Psmc6,Fbxo5,Psmd9,Ube2c,Anapc10,Psmd11,Cdc16,Psmd1,Psme4,Ccnb1,Psmb11,Cdc20,Anapc15,Bub1b,Bub3,Ube2s,Cdk1,Cdk2,Rps27a,Psmb9,Psmb8,Anapc1,Psmd7,Nek2,Plk1,Psma2,Psma3,Psmb1,Psmb10,Psmb4,Psmb5,Psmb6,Psmb7,Psmc1,Psmc2,Psmc3,Psmc5,Psmd4,Psme1,Psme2,Psme3,Anapc4,Ube2d1,Rb1,Cdc23,Anapc16,Psmd10,Cdc27,Aurkb,Psmd2,Psmd3,Uba52,Ubb,Ube2e1,Mad2l1,Anapc7,Fzr1,Psm…
Visual phototransduction	2.12184	0.0126186	Rdh10,Cyp4v3,Cngb1,Gpc2,Bco2,Ppef1,Camkmt,Apob,Rdh1,Plb1,Lrp12,Metap1,Clps,Apoa1,Apoa4,Apoc2,Apoc3,Apoe,Akr1b7,Dhrs9,Fntb,Calm1,Calm2,Calm3,Lrat,Fnta,Gnb1,Gnb5,Gpc1,Gpc4,Guca1a,Gucy2e,Sdc2,Hspg2,Awat2,Gucy2f,Lrp1,Rdh11,Myo7a,Nmt1,Nmt2,Pde6g,Rbp1,Rbp2,Rbp3,Rbp4,Rgs9,Rlbp1,Rpe65,Dhrs3,Sag,Sdc1,Sdc3,Sdc4,Metap2,Gpc6,Hsd17b6,Bco1,Lrp10
Regulation of mitotic cell cycle	2.05775	0.0126186	Cdc14a,Anapc11,Anapc2,Psmd6,Cdc26,Psmd12,Psmd5,Psmc6,Fbxo5,Psmd9,Ube2c,Anapc10,Psmd11,Cdc16,Psmd1,Psme4,Ccnb1,Psmb11,Cdc20,Anapc15,Bub1b,Bub3,Ube2s,Cdk1,Cdk2,Rps27a,Psmb9,Psmb8,Anapc1,Psmd7,Nek2,Plk1,Psma2,Psma3,Psmb1,Psmb10,Psmb4,Psmb5,Psmb6,Psmb7,Psmc1,Psmc2,Psmc3,Psmc5,Psmd4,Psme1,Psme2,Psme3,Anapc4,Ube2d1,Rb1,Cdc23,Anapc16,Psmd10,Cdc27,Aurkb,Psmd2,Psmd3,Uba52,Ubb,Ube2e1,Mad2l1,Anapc7,Fzr1,Psm…
Asymmetric localization of PCP proteins	2.16602	0.0126186	Smurf2,Psmd6,Psmd12,Psmd5,Psmc6,Psmd9,Psmd11,Psmd1,Psme4,Psmb11,Smurf1,Rps27a,Dvl2,Fzd1,Fzd4,Fzd5,Fzd8,Psmb9,Psmb8,Psmd7,Psma2,Psma3,Psmb1,Psmb10,Psmb4,Psmb5,Psmb6,Psmb7,Psmc1,Psmc2,Psmc3,Psmc5,Psmd4,Psme1,Psme2,Psme3,Psmd10,Psmd2,Psmd3,Uba52,Ubb,Wnt5a,Pard6a,Psmc4,Psmd13,Fzd2,Psmd8,Psmd14,Psma1,Psma4,Psma5,Psma6,Psma7,Psmb2,Psmb3,Psmf1
Metabolism of carbohydrates	1.73414	0.0126186	Pgls,Aldob,Rpe,Rae1,Pgm2,Nupl2,Slc25a11,Dcxr,Gnpda2,Chpf2,G6pc3,Dera,Cryl1,Phkg2,Phkb,Nup35,Nup37,Nup43,Xylt1,Slc35d2,Csgalnact1,Nup107,Pgm2l1,Nup133,Rbks,Hs3st4,Glyctk,Nup93,Nupl1,Gpc2,Seh1l,Chst14,Adpgk,Pgm1,B3gnt3,Nup155,Pfkfb3,Nup54,B3gat3,Ndc1,Fut11,Chsy1,Nup98,Pfkfb4,Man2c1,Gbe1,Chpf,Gale,Pck2,Glb1l,Shpk,Pom121,Gns,Slc35b3,B4gat1,Tpr,Chst1,Aldh1a1,Aldoa,Aldoc,Akr1b3,Gusb,Pygl,Phka2,Manba,Pg…
Ion transport by P-type ATPases	2.20373	0.0126186	Atp1a2,Atp2b1,Atp2c2,Atp1a3,Atp2c1,Atp13a1,Pdzd11,Atp13a2,Camk2d,Atp11b,Sri,Atp1a1,Atp1b1,Atp1b2,Atp1b3,Atp2a1,Atp2a2,Atp2b2,Atp7a,Atp7b,Atp8a1,Atp9a,Atp10a,Atp8b4,Calm1,Calm2,Calm3,Camk2b,Camk2g,Fxyd3,Atp8a2,Atp11a,Atp9b,Atp2a3,Atp2b4,Atp8b1,Fxyd1,Atp10b,Fxyd7,Atp11c,Atp13a4
Metabolism of fat-soluble vitamins	2.29027	0.0127138	Vkorc1l1,Ubiad1,Gpc2,Bco2,Apob,Plb1,Lrp12,Clps,Apoa1,Apoa4,Apoc2,Apoc3,Apoe,Akr1b7,Lrat,Gpc1,Gpc4,Sdc2,Hspg2,Lrp1,Rdh11,Rbp1,Rbp2,Rbp4,Sdc1,Sdc3,Sdc4,Gpc6,Vkorc1,Bco1,Lrp10
RHOJ GTPase cycle	2.20045	0.0127476	Vangl1,Lamtor1,Wwp2,Arl13b,Steap3,Wipf2,Arhgap32,Arhgap35,Pak4,Arhgap26,Arhgap21,Cdc42ep1,Scrib,Wasl,Mpp7,Dock8,Iqgap3,Cav1,Cdc42,Stom,Fnbp1,Gja1,Prex1,Rhoj,Jup,Pik3r1,Pik3r2,Rab7,Git1,Snap23,Cdc42bpb,Arhgef7,Depdc1b,Tfrc,Vamp3,Was,Fmnl3,Diaph3,Ocrl,Git2,Trio,Pak2,Ophn1,Cdc42bpa,Arhgap1
Laminin interactions	2.29788	0.0127849	Col18a1,Col4a1,Col4a2,Hspg2,Itga2,Itga3,Itga6,Itgb1,Lama1,Lama2,Lama3,Lama4,Lama5,Lamb1,Lamb2,Lamb3,Nid1,Nid2,Itgb4
Cholesterol biosynthesis	2.26466	0.0128395	Lbr,Msmo1,Pmvk,Arv1,Sc5d,Tm7sf2,Plpp6,Dhcr24,Fdps,Hmgcs1,Acat2,Cyp51,Dhcr7,Ebp,Fdft1,Ggps1,Hmgcr,Hsd17b7,Lss,Mvk,Nsdhl,Sqle,Idi1,Mvd
Deadenylation-dependent mRNA decay	2.16632	0.0128395	Lsm7,Wdr61,Exosc3,Lsm5,Exosc7,Exosc1,Tut4,Lsm1,Cnot6l,Lsm3,Cnot3,Cnot8,Dcps,Exosc8,Pan2,Dcp2,Cnot1,Edc4,Cnot6,Cnot2,Pan3,Dis3,Parn,Skiv2l,Eif4b,Dcp1a,Exosc4,Eif4g1,Lsm6,Ddx6,Cnot10,Eif4a1,Eif4a2,Eif4e,Tut7,Lsm4,Exosc9,Pabpc1,Cnot7,Cnot11,Cnot4,Ttc37,Paip1,Hbs1l,Cnot9,Edc3,Lsm2,Exosc5,Eif4a3,Patl1,Exosc2,Tnks1bp1
Mitophagy	2.28055	0.0128395	Tomm6,Tomm7,Map1lc3a,Mfn1,Map1lc3b,Atg12,Tomm20,Tomm5,Pink1,Fundc1,Mfn2,Pgam5,Atg5,Csnk2a1,Csnk2a2,Csnk2b,Sqstm1,Tomm40,Src,Ulk1,Vdac1,Tomm22,Tomm70a
Condensation of Prophase Chromosomes	2.2665	0.0129937	H4c17,Kmt5a,H2aj,H4c8,Smc4,Ccnb1,Ncapg2,H2az2,Cdk1,Ncapd3,Smc2,Mcph1,H2ac18,H2ax,Plk1,H2az1,Rb1,Ncaph2,Set,H4c11,H2ac10,H2bc11,H2bc3,H2bc21,Phf8,H4c14
Signaling by FGFR4	2.28784	0.0130069	Frs2,Braf,Cbl,Rps27a,Fgf15,Fgf2,Fgf9,Gab1,Grb2,Hras,Kras,Mknk1,Pik3ca,Pik3r1,Plcg1,Ppp2r1a,Ppp2ca,Ppp2cb,Ptpn11,Shc1,Sos1,Src,Uba52,Ubb,Spry2,Mapk1,Mapk3
Recognition and association of DNA glycosylase with site containing an affected purine	2.21486	0.0131964	H4c17,Pot1a,H2aj,H4c8,Neil3,Acd,H2az2,H2ac18,H2ax,Ogg1,H2az1,Terf1,Terf2,H4c11,H2ac10,H2bc11,H2bc3,H2bc21,Terf2ip,H4c14
Metabolism of steroids	2.05465	0.0131964	Lbr,Msmo1,Osbpl6,Osbpl9,Fdx2,Pmvk,Hsd3b7,Slc51b,Arv1,Cyp27a1,Sc5d,Osbpl3,Scap,Stard4,Stard5,Stard6,Acot8,Sumo2,Tm7sf2,Slc51a,Mbtps2,Plpp6,Dhcr24,Stard3nl,Osbp,Abcc3,Tspoap1,Akr1b3,Cyp11b1,Fdps,Akr1b7,Hmgcs1,Acat2,Tspo,Ch25h,Cyp11a1,Cyp17a1,Cyp19a1,Cyp21a1,Cyp51,Cyp7b1,Dhcr7,Srd5a1,Ebp,Fdft1,Fdx1,Fdxr,Akr1b8,Ggps1,Hmgcr,Hsd11b1,Hsd11b2,Hsd17b2,Hsd17b4,Hsd17b7,Fabp6,Kpnb1,Hsd17b11,Lss,Amacr,Mvk,Nco…
Apoptotic factor-mediated response	2.21915	0.0134449	Diablo,Gsdmd,Aven,Apaf1,Xiap,Bak1,Bax,Casp3,Casp7,Casp9,Cycs,Septin4,Gsdme,Apip,Mapk1,Mapk3
Protein methylation	2.22464	0.0134449	Mettl21a,Eef1akmt1,Eef2kmt,Prmt3,Eef1akmt2,Vcp,Camkmt,Vcpkmt,Calm1,Calm2,Calm3,Etfb,Eef2,Hspa8,Kin,Rps2,Etfbkmt
Signaling by FGFR3	2.28334	0.0134534	Frs2,Braf,Cbl,Rps27a,Fgf2,Fgf9,Gab1,Galnt3,Grb2,Hras,Kras,Mknk1,Pik3ca,Pik3r1,Plcg1,Ppp2r1a,Ppp2ca,Ppp2cb,Ptpn11,Shc1,Sos1,Src,Uba52,Ubb,Spry2,Mapk1,Mapk3
MyD88:MAL(TIRAP) cascade initiated on plasma membrane	2.08318	0.0140833	Tab1,Ube2v1,Peli1,Tnip2,Dusp6,Tab2,Vrk3,Nkiras1,Mapkapk3,Fbxw11,Dusp7,Nkiras2,Dusp3,Rps6ka5,Nod1,Irak2,App,Atf1,Atf2,Rps27a,Creb1,Fos,Hmgb1,Ikbkb,Ikbkg,Irak1,Jun,Mapkapk2,Nfkb1,Nfkb2,Nfkbia,Nfkbib,Tirap,Ppp2r1a,Ppp2ca,Ppp2cb,Rela,S100b,Skp1,Traf6,Uba52,Ubb,Mapk7,Dusp4,Map2k3,Map2k4,Map2k6,Map2k7,Map3k7,Map3k8,Mapk1,Mapk10,Mapk14,Mapk3,Mapk8,Mapk9,Ecsit,Cul1,Ube2n,Peli2,Ripk2
Toll Like Receptor TLR1:TLR2 Cascade	2.08318	0.0140833	Tab1,Ube2v1,Peli1,Tnip2,Dusp6,Tab2,Vrk3,Nkiras1,Mapkapk3,Fbxw11,Dusp7,Nkiras2,Dusp3,Rps6ka5,Nod1,Irak2,App,Atf1,Atf2,Rps27a,Creb1,Fos,Hmgb1,Ikbkb,Ikbkg,Irak1,Jun,Mapkapk2,Nfkb1,Nfkb2,Nfkbia,Nfkbib,Tirap,Ppp2r1a,Ppp2ca,Ppp2cb,Rela,S100b,Skp1,Traf6,Uba52,Ubb,Mapk7,Dusp4,Map2k3,Map2k4,Map2k6,Map2k7,Map3k7,Map3k8,Mapk1,Mapk10,Mapk14,Mapk3,Mapk8,Mapk9,Ecsit,Cul1,Ube2n,Peli2,Ripk2
Toll Like Receptor TLR6:TLR2 Cascade	2.08318	0.0140833	Tab1,Ube2v1,Peli1,Tnip2,Dusp6,Tab2,Vrk3,Nkiras1,Mapkapk3,Fbxw11,Dusp7,Nkiras2,Dusp3,Rps6ka5,Nod1,Irak2,App,Atf1,Atf2,Rps27a,Creb1,Fos,Hmgb1,Ikbkb,Ikbkg,Irak1,Jun,Mapkapk2,Nfkb1,Nfkb2,Nfkbia,Nfkbib,Tirap,Ppp2r1a,Ppp2ca,Ppp2cb,Rela,S100b,Skp1,Traf6,Uba52,Ubb,Mapk7,Dusp4,Map2k3,Map2k4,Map2k6,Map2k7,Map3k7,Map3k8,Mapk1,Mapk10,Mapk14,Mapk3,Mapk8,Mapk9,Ecsit,Cul1,Ube2n,Peli2,Ripk2
Toll Like Receptor 2 (TLR2) Cascade	2.08318	0.0140833	Tab1,Ube2v1,Peli1,Tnip2,Dusp6,Tab2,Vrk3,Nkiras1,Mapkapk3,Fbxw11,Dusp7,Nkiras2,Dusp3,Rps6ka5,Nod1,Irak2,App,Atf1,Atf2,Rps27a,Creb1,Fos,Hmgb1,Ikbkb,Ikbkg,Irak1,Jun,Mapkapk2,Nfkb1,Nfkb2,Nfkbia,Nfkbib,Tirap,Ppp2r1a,Ppp2ca,Ppp2cb,Rela,S100b,Skp1,Traf6,Uba52,Ubb,Mapk7,Dusp4,Map2k3,Map2k4,Map2k6,Map2k7,Map3k7,Map3k8,Mapk1,Mapk10,Mapk14,Mapk3,Mapk8,Mapk9,Ecsit,Cul1,Ube2n,Peli2,Ripk2
Interleukin-17 signaling	2.15209	0.0143171	Tab1,Ube2v1,Tnip2,Dusp6,Tab2,Vrk3,Mapkapk3,Fbxw11,Dusp7,Dusp3,Rps6ka5,Nod1,Irak2,Atf1,Atf2,Rps27a,Creb1,Fos,Ikbkb,Ikbkg,Irak1,Jun,Mapkapk2,Nfkb1,Ppp2r1a,Ppp2ca,Ppp2cb,Skp1,Traf6,Uba52,Ubb,Mapk7,Dusp4,Map2k3,Map2k4,Map2k6,Map2k7,Map3k7,Map3k8,Mapk1,Mapk10,Mapk14,Mapk3,Mapk8,Mapk9,Cul1,Ube2n,Ripk2
MAP kinase activation	2.15209	0.0143171	Tab1,Ube2v1,Tnip2,Dusp6,Tab2,Vrk3,Mapkapk3,Fbxw11,Dusp7,Dusp3,Rps6ka5,Nod1,Irak2,Atf1,Atf2,Rps27a,Creb1,Fos,Ikbkb,Ikbkg,Irak1,Jun,Mapkapk2,Nfkb1,Ppp2r1a,Ppp2ca,Ppp2cb,Skp1,Traf6,Uba52,Ubb,Mapk7,Dusp4,Map2k3,Map2k4,Map2k6,Map2k7,Map3k7,Map3k8,Mapk1,Mapk10,Mapk14,Mapk3,Mapk8,Mapk9,Cul1,Ube2n,Ripk2
FLT3 Signaling	2.25119	0.0143748	Akt1,Akt2,Cbl,Cdkn1b,Rps27a,Csk,Flt3l,Grb10,Grb2,Hras,Kras,Lck,Sh2b3,Grap2,Pik3ca,Pik3r1,Ptprj,Socs2,Sla,Sos1,Syk,Socs6,Uba52,Ubb,Foxo3,Akt3
Gluconeogenesis	2.26289	0.014493	Aldob,Slc25a11,G6pc3,Pck2,Aldoa,Aldoc,Slc25a12,Slc25a1,Eno1,Eno2,Eno3,Fbp2,Fbp1,G6pc,G6pc2,Slc37a4,Gapdh,Got1,Got2,Gpi1,Mdh2,Mdh1,Slc25a13,Pck1,Pgam1,Pgk1,Tpi1,Pgam2,Slc37a2,Slc25a10,Slc37a1
Toll Like Receptor 7/8 (TLR7/8) Cascade	2.02042	0.0146184	Tab1,Ube2v1,Peli1,Tnip2,Dusp6,Tab2,Vrk3,Nkiras1,Mapkapk3,Fbxw11,Dusp7,Nkiras2,Dusp3,Rps6ka5,Ticam1,Nod1,Irak2,App,Atf1,Atf2,Cd14,Rps27a,Creb1,Fos,Hmgb1,Ikbkb,Ikbkg,Irak1,Jun,Ly96,Mapkapk2,Nfkb1,Nfkb2,Nfkbia,Nfkbib,Ppp2r1a,Ppp2ca,Ppp2cb,Rela,S100b,Irf7,Skp1,Tlr4,Traf6,Uba52,Ubb,Mapk7,Dusp4,Map2k3,Map2k4,Map2k6,Map2k7,Map3k7,Map3k8,Mapk1,Mapk10,Mapk14,Mapk3,Mapk8,Mapk9,Ecsit,Cul1,Ube2n,Peli2,Ripk2
MET promotes cell motility	2.22271	0.0146184	Rapgef1,Rap1a,Col11a2,Col3a1,Col5a1,Col5a2,Col1a1,Col1a2,Crk,Crkl,Col27a1,Ptk2,Fn1,Gab1,Grb2,Hgf,Itga2,Itga3,Itgb1,Lama1,Lama2,Lama3,Lama4,Lama5,Lamb1,Lamb2,Lamb3,Rap1b,Rac1,Tns4,Src,Col5a3,Tns3
MyD88 dependent cascade initiated on endosome	2.02042	0.0146184	Tab1,Ube2v1,Peli1,Tnip2,Dusp6,Tab2,Vrk3,Nkiras1,Mapkapk3,Fbxw11,Dusp7,Nkiras2,Dusp3,Rps6ka5,Ticam1,Nod1,Irak2,App,Atf1,Atf2,Cd14,Rps27a,Creb1,Fos,Hmgb1,Ikbkb,Ikbkg,Irak1,Jun,Ly96,Mapkapk2,Nfkb1,Nfkb2,Nfkbia,Nfkbib,Ppp2r1a,Ppp2ca,Ppp2cb,Rela,S100b,Irf7,Skp1,Tlr4,Traf6,Uba52,Ubb,Mapk7,Dusp4,Map2k3,Map2k4,Map2k6,Map2k7,Map3k7,Map3k8,Mapk1,Mapk10,Mapk14,Mapk3,Mapk8,Mapk9,Ecsit,Cul1,Ube2n,Peli2,Ripk2
PINK1-PRKN Mediated Mitophagy	2.17037	0.0146644	Tomm6,Tomm7,Map1lc3a,Mfn1,Map1lc3b,Atg12,Tomm20,Tomm5,Pink1,Mfn2,Atg5,Sqstm1,Tomm40,Vdac1,Tomm22,Tomm70a
Cell-cell junction organization	2.21019	0.015127	Actb,Actg1,Ang,Ctnna1,Ctnnb1,Ctnnd1,Cdh1,Cdh11,Cdh17,Cdh3,Cdh5,Cdh6,F11r,Jup,Afdn,Prkci,Nectin2,Pvr,Pard6a,Pard6b,Nectin1,Nectin3,Pard6g,Pard3
Cytosolic sensors of pathogen-associated DNA	2.22804	0.0154951	Ep300,Nkiras1,Trim32,Nkiras2,Dhx36,Sting1,Ddx41,Dtx4,Ctnnb1,Rps27a,Dhx9,Ikbkb,Ikbkg,Mre11a,Myd88,Nfkb1,Nfkb2,Nfkbia,Nfkbib,Rela,Stat6,Irf7,Irf3,Uba52,Ubb,Aim2,Tbk1,Trim56
MTOR signalling	2.19745	0.0157648	Lamtor4,Lamtor1,Akt1s1,Rraga,Lamtor5,Cab39l,Slc38a9,Strada,Rps6kb1,Prkaa1,Prkaa2,Prkag2,Eif4b,Akt1,Akt2,Eif4g1,Cab39,Eef2k,Eif4e,Eif4ebp1,Fkbp1a,Lamtor2,Ppm1a,Prkab1,Rragd,Rheb,Rps6,Stk11,Rragc,Ywhab,Lamtor3,Mlst8,Mtor,Stradb,Tsc1
DDX58/IFIH1-mediated induction of interferon-alpha/beta	2.26451	0.0159357	Ddx58,Ep300,Nkiras1,Nkiras2,Nlrx1,Cyld,App,Rps27a,Hmgb1,Hsp90ab1,Hsp90aa1,Ikbkb,Ikbkg,Nfkb1,Nfkb2,Nfkbia,Nfkbib,Tax1bp1,Rela,S100b,Irf7,Irf3,Tnfaip3,Uba52,Ubb,Tbk1,Ikbke,Pin1,Tomm70a,Mavs
Pyroptosis	2.16422	0.0159357	Chmp4c,Chmp3,Chmp2b,Chmp2a,Gsdmd,Chmp7,Chmp4b,Chmp6,Bak1,Bax,Casp1,Casp4,Casp3,Cycs,Gzmb,Hmgb1,Il1a,Il1b,Gsdme
Downregulation of ERBB2 signaling	2.17016	0.0159996	Rnf41,Cul5,Akt1,Akt2,Cdc37,Rps27a,Egfr,Erbb2,Erbb3,Ereg,Hbegf,Hsp90aa1,Matk,Usp8,Ptpn12,Ptpn18,Uba52,Ubb,Stub1,Akt3,Erbin
Deactivation of the beta-catenin transactivating complex	2.22	0.0161633	Ctnnbip1,Chd8,Xpo1,Hdac1,Cby1,Akt1,Akt2,Xiap,Ctnnb1,Rps27a,Ctbp1,Lef1,Sox13,Sox17,Sox4,Sox6,Sox9,Tcf7,Tcf7l2,Tle1,Tle3,Tle4,Uba52,Ubb,Ywhaz
Collagen biosynthesis and modifying enzymes	2.1552	0.0163972	Colgalt1,Colgalt2,Col23a1,Col16a1,Col26a1,Col6a5,Pcolce2,Bmp1,Serpinh1,Col11a2,Col12a1,Col13a1,Col14a1,Col15a1,Col18a1,Col3a1,Col4a1,Col4a2,Col5a1,Col5a2,Col6a1,Col6a2,Col1a1,Col1a2,Col27a1,P3h2,P4ha1,P4ha2,P4hb,Pcolce,Plod1,Ppib,Adamts2,Col5a3,P3h1,Crtap,Tll2,Plod2,Plod3
Signaling by PDGF	2.13923	0.0171202	Pik3cb,Rapgef1,Col6a5,Col3a1,Col4a1,Col4a2,Col5a1,Col5a2,Col6a1,Col6a2,Bcar1,Crk,Crkl,Grb2,Grb7,Hras,Kras,Nck1,Nck2,Furin,Pdgfa,Pdgfb,Pdgfra,Pdgfrb,Pik3ca,Pik3r1,Pik3r2,Plat,Plcg1,Ptpn11,Ptpn12,Sos1,Src,Stat3,Stat5a,Stat5b,Stat6,Col5a3,Rasa1,Thbs3,Pdgfc
Toll Like Receptor 4 (TLR4) Cascade	1.9555	0.0172975	Ube2d3,Tab1,Ube2v1,Peli1,Tnip2,Bpi,Dusp6,Tab2,Vrk3,Nkiras1,Mapkapk3,Fbxw11,Plcg2,Dusp7,Nkiras2,Dusp3,Rps6ka5,Ticam1,Nod1,Irak2,Birc3,Birc2,App,Atf1,Atf2,Casp8,Cd14,Rps27a,Creb1,Dnm1,Dnm2,Fadd,Fos,Hmgb1,Ikbkb,Ikbkg,Irak1,Itgb2,Jun,Lbp,Ly86,Ly96,Mapkapk2,Nfkb1,Nfkb2,Nfkbia,Nfkbib,Tirap,Ppp2r1a,Ppp2ca,Ppp2cb,Ptpn11,Ube2d1,Rela,Ripk1,S100b,Sftpd,Tank,Irf7,Irf3,Skp1,Tlr4,Traf3,Traf6,Uba52,Ubb,Tbk1,Ikb…
Peptide hormone metabolism	2.11616	0.0173505	Sec11c,Exoc2,Spcs2,Ero1b,Spcs1,Slc30a5,Ffar1,Exoc8,Exoc1,Ace2,Atp6ap2,Aopep,Exoc5,Ffar4,Spcs3,Ace,Bche,Cpa3,Ctsd,Gnat3,Dpp4,Slc30a6,Enpep,Gcg,Gip,Gnb1,Exoc3,Igf1,Inha,Inhba,Inhbb,Inhbe,Lep,Cma1,Mme,Ero1a,Pcsk1,Pomc,Ren1,Exoc4,Exoc7,Sec11a,Pla2g7,Grp,Ctsz,Gng13
Gap junction trafficking and regulation	2.16731	0.0174251	Cltc,Tubb6,Tubb2b,Cltb,Tubal3,Actb,Actg1,Ap2m1,Dab2,Dnm1,Dnm2,Gja1,Gja4,Gjc1,Gjb1,Gjb2,Gjb3,Gjb4,Gjb5,Gjb6,Gjc2,Src,Tjp1,Tuba1a,Tuba1b,Tuba4a,Tubb3,Tubb4b
Endosomal Sorting Complex Required For Transport (ESCRT)	2.16513	0.0174251	Vta1,Chmp4c,Chmp3,Vps28,Ubap1,Vps37b,Chmp2b,Chmp2a,Vps36,Mvb12b,Chmp7,Mvb12a,Vps37c,Chmp4b,Chmp5,Chmp6,Rps27a,Hgs,Vps4a,Vps37a,Vps4b,Stam,Tsg101,Uba52,Ubb,Stam2,Snf8,Vps25
mTORC1-mediated signalling	2.1445	0.0174293	Lamtor4,Lamtor1,Akt1s1,Rraga,Lamtor5,Slc38a9,Rps6kb1,Eif4b,Eif4g1,Eef2k,Eif4e,Eif4ebp1,Fkbp1a,Lamtor2,Rragd,Rheb,Rps6,Rragc,Ywhab,Lamtor3,Mlst8,Mtor
Hedgehog 'off' state	1.96362	0.0177751	Psmd6,Psmd12,Psmd5,Psmc6,Psmd9,Ift172,Tubb6,Psmd11,Psmd1,Fuz,Psme4,Adcy3,Adcy4,Adcy1,Ofd1,Ttc21b,Tubb2b,Ift140,Psmb11,Ift57,Adcy6,Adcy7,Adcy8,Adcy9,Gpr161,Dync2h1,Rps27a,Gli1,Gli2,Ift122,Itch,Ift52,Kif3a,Psmb9,Psmb8,Psmd7,Numb,Prkaca,Prkacb,Prkar1a,Prkar1b,Prkar2b,Psma2,Psma3,Psmb1,Psmb10,Psmb4,Psmb5,Psmb6,Psmb7,Psmc1,Psmc2,Psmc3,Psmc5,Psmd4,Psme1,Psme2,Psme3,Ptch1,Intu,Mks1,Psmd10,Skp1,Psmd2,Ift…
Cyclin D associated events in G1	2.11861	0.017837	Ccnh,E2f4,Ppp2r2a,Abl1,Ccnd1,Ccnd2,Ccnd3,Ccne1,Ccne2,Cdk2,Cdk4,Cdk6,Cdk7,Cdkn1a,Cdkn1b,Cdkn1c,Cdkn2b,Rps27a,E2f2,E2f3,E2f5,Jak2,Lyn,Mnat1,Ppp2r1a,Ppp2ca,Ppp2cb,Rb1,Rbl1,Rbl2,Ptk6,Src,Cks1b,Skp1,Tfdp1,Uba52,Ubb,Cul1,Skp2
G1 Phase	2.11861	0.017837	Ccnh,E2f4,Ppp2r2a,Abl1,Ccnd1,Ccnd2,Ccnd3,Ccne1,Ccne2,Cdk2,Cdk4,Cdk6,Cdk7,Cdkn1a,Cdkn1b,Cdkn1c,Cdkn2b,Rps27a,E2f2,E2f3,E2f5,Jak2,Lyn,Mnat1,Ppp2r1a,Ppp2ca,Ppp2cb,Rb1,Rbl1,Rbl2,Ptk6,Src,Cks1b,Skp1,Tfdp1,Uba52,Ubb,Cul1,Skp2
Metabolism of polyamines	2.05063	0.0180567	Psmd6,Psmd12,Psmd5,Psmc6,Psmd9,Psmd11,Psmd1,Psme4,Psmb11,Agmat,Amd1,Azin2,Paox,Psmb9,Psmb8,Psmd7,Nqo1,Oaz1,Oaz2,Odc1,Psma2,Psma3,Psmb1,Psmb10,Psmb4,Psmb5,Psmb6,Psmb7,Psmc1,Psmc2,Psmc3,Psmc5,Psmd4,Psme1,Psme2,Psme3,Sat1,Sms,Psmd10,Srm,Azin1,Psmd2,Psmd3,Psmc4,Psmd13,Psmd8,Psmd14,Psma1,Psma4,Psma5,Psma6,Psma7,Psmb2,Psmb3,Smox,Psmf1
Synthesis of active ubiquitin: roles of E1 and E2 enzymes	2.18585	0.0182518	Ube2w,Ube2g1,Ube2t,Uba6,Ube2r2,Ube2c,Ube2z,Otulin,Ube2q2,Ube2s,Rps27a,Uchl3,Ube2d1,Cdc34,Ube2k,Uba52,Ubb,Ube2e3,Ube2e1,Ube2l3,Uba1,Ube2a,Ube2b,Ube2g2,Ube2h,Usp5,Usp9x,Usp7,Ube2d2a
Signaling by FGFR1	2.19146	0.0184274	Frs2,Flrt3,Flrt2,Braf,Cbl,Rps27a,Fgf2,Fgf9,Fgfr1,Gab1,Grb2,Hras,Spred1,Spred2,Kras,Mknk1,Fgfrl1,Pik3ca,Pik3r1,Plcg1,Ppp2r1a,Ppp2ca,Ppp2cb,Ptpn11,Shc1,Sos1,Src,Uba52,Ubb,Spry2,Mapk1,Mapk3
TP53 regulates transcription of additional cell cycle genes whose exact role in the p53 pathway remain uncertain	2.10991	0.0188513	Cnot6l,Cnot3,Cnot8,Cnot1,Cnot6,Cnot2,Btg2,Cdc25c,Cnot10,Npm1,Cnot7,Cnot11,Plk2,Cnot4,Cenpj,Cnot9,Tnks1bp1
DNA Replication	1.819	0.0188513	Dna2,Anapc11,Anapc2,Psmd6,Cdc26,Pole4,Psmd12,Psmd5,Psmc6,Psmd9,Cdt1,H4c17,Rpa3,Rpa1,H2aj,Ube2c,Anapc10,Psmd11,Rfc3,H4c8,Pold4,Cdc16,Mcm10,Psmd1,Psme4,Rfc5,Rfc4,Psmb11,Anapc15,Gins2,Gins4,H2az2,Ube2s,Ccne1,Ccne2,Cdc45,Cdc7,Cdk2,Rps27a,E2f2,E2f3,H3f3a,H3f3b,H2ac18,H2ax,Kpnb1,Kpna1,Kpna6,Lig1,Psmb9,Psmb8,Mcm3,Mcm2,Mcm4,Mcm5,Mcm6,Mcm7,Anapc1,Psmd7,Orc3,Orc1,Orc2,Pcna,Pola1,Pola2,Pold1,Pold2,Pole,Pole…
Muscle contraction	1.92192	0.0189529	Ahcyl1,Atp1a2,Asph,Myl9,Npr2,Nppa,Myl12b,Atp2b1,Akap9,Atp1a3,Scn3b,Scn2b,Trim72,Camk2d,Sri,Itga1,Acta1,Actc1,Actg2,Acta2,Atp1a1,Atp1b1,Atp1b2,Atp1b3,Atp2a1,Atp2a2,Atp2b2,Cacna1c,Calm1,Calm2,Calm3,Camk2b,Camk2g,Scn2a,Des,Dmpk,Dmd,Fgf11,Kcnip2,Cacng7,Itgb5,Itpr1,Itpr2,Itpr3,Kcnd1,Kcnh2,Kcnj2,Kcnk1,Kcnk2,Kcnk5,Kcnq1,Fxyd3,Myh3,Myl7,Myl1,Myl6,Mylpf,Tmod4,Tmod3,Npr1,Prkaca,Pxn,Kcnk6,Myl6b,Ryr1,Ryr3,Sc…
Recruitment and ATM-mediated phosphorylation of repair and signaling proteins at DNA double strand breaks	2.11058	0.0189529	Kdm4a,H4c17,Babam1,H4c8,Rnf168,Ube2v2,Abraxas1,Nsd2,Babam2,Mdc1,Abl1,Apbb1,Atm,Rps27a,Eya3,Brcc3,Herc2,H2ax,Kat5,Mre11a,Chek2,Ppp5c,Uimc1,Trp53,Uba52,Ubb,Ube2i,Sumo1,Baz1b,H4c11,H2bc11,H2bc3,H2bc21,Rnf8,Pias4,Mapk8,Trp53bp1,Nbn,Smarca5,Ube2n,Kdm4b,H4c14
Basigin interactions	2.10419	0.0189883	Ppil2,Slc7a6,Ppia,Atp1b1,Atp1b2,Atp1b3,Bsg,Cav1,Slc16a3,Itga3,Itga6,Itgb1,Slc3a2,Slc7a8,Slc16a1,Slc7a5,Slc7a7,Slc7a11,Slc7a9
ROS and RNS production in phagocytes	2.1493	0.0195627	Atp6v1f,Atp6v1g2,Atp6v1g1,Atp6v1c1,Atp6v1d,Hvcn1,Atp6v1h,Atp6v0e2,Atp6v1a,Atp6v1b2,Atp6v0d1,Atp6v1e1,Atp6v0e,Atp6v0a1,Atp6v0c,Cyba,Cybb,Atp6v0b,Mpo,Ncf1,Ncf2,Nos2,Nos3,Slc11a1,Rac2,Atp6v0a2,Tcirg1
Cleavage of the damaged purine	2.07714	0.0199858	H4c17,Pot1a,H2aj,H4c8,Neil3,Mutyh,Acd,Mpg,H2az2,H2ac18,H2ax,Ogg1,H2az1,Terf1,Terf2,H4c11,H2ac10,H2bc11,H2bc3,H2bc21,Terf2ip,H4c14
Formation of RNA Pol II elongation complex	2.0478	0.0199858	Wdr61,Polr2e,Gtf2h5,Polr2l,Ccnh,Polr2b,Ctdp1,Elob,Polr2g,Eloc,Ncbp2,Gtf2f2,Polr2d,Polr2f,Polr2i,Mllt3,Leo1,Ccnt2,Ncbp1,Iws1,Eaf1,Cdk9,Rtf1,Ccnt1,Cdk7,Gtf2h3,Ell,Ercc2,Ercc3,Gtf2h1,Supt16,Polr2h,Mnat1,Polr2k,Cdc73,Polr2a,Polr2c,Ssrp1,Supt4a,Supt5,Supt6,Tcea1,Paf1,Ctr9,Gtf2h2,Nelfa,Nelfcd,Nelfb,Eloa,Nelfe,Aff4,Mllt1,Gtf2f1
Depurination	2.07714	0.0199858	H4c17,Pot1a,H2aj,H4c8,Neil3,Mutyh,Acd,Mpg,H2az2,H2ac18,H2ax,Ogg1,H2az1,Terf1,Terf2,H4c11,H2ac10,H2bc11,H2bc3,H2bc21,Terf2ip,H4c14
RNA Polymerase II Transcription Elongation	2.0478	0.0199858	Wdr61,Polr2e,Gtf2h5,Polr2l,Ccnh,Polr2b,Ctdp1,Elob,Polr2g,Eloc,Ncbp2,Gtf2f2,Polr2d,Polr2f,Polr2i,Mllt3,Leo1,Ccnt2,Ncbp1,Iws1,Eaf1,Cdk9,Rtf1,Ccnt1,Cdk7,Gtf2h3,Ell,Ercc2,Ercc3,Gtf2h1,Supt16,Polr2h,Mnat1,Polr2k,Cdc73,Polr2a,Polr2c,Ssrp1,Supt4a,Supt5,Supt6,Tcea1,Paf1,Ctr9,Gtf2h2,Nelfa,Nelfcd,Nelfb,Eloa,Nelfe,Aff4,Mllt1,Gtf2f1
RHOH GTPase cycle	2.12983	0.0199858	Vangl1,Lamtor1,Pak4,Uaca,Vcp,Mtr,Rhoh,Wdr11,Arhgdib,Cav1,Csk,Dbt,Stom,Fam91a1,Jup,Lck,Pak6,Rab7,Rock1,Rock2,Tfrc,Tuba1b,Vamp3,Dbn1,Tmem59,Ralgapa1,Nsfl1c,Pak2,Arhgdia
Inactivation of CSF3 (G-CSF) signaling	2.08935	0.0201554	Ube2d3,Elob,Eloc,Cul5,Socs3,Socs1,Rps27a,Csf3r,Hck,Jak2,Lyn,Ube2d1,Rnf7,Syk,Tyk2,Uba52,Ubb,Ube2d2a
Signaling by TGFB family members	1.94545	0.0202226	Ube2d3,Smurf2,Snw1,Zfyve9,Cdk8,Bambi,Arhgef18,E2f4,Mtmr4,Acvr1c,Ccnt2,Hdac1,Cdk9,Smurf1,Acvr1b,Acvr2a,Acvr2b,Acvrl1,Rhoa,Bmp2,Bmpr1a,Bmpr2,Amhr2,Cbl,Ccnt1,Rps27a,E2f5,Fkbp1a,Fst,Fstl1,Inhba,Inhbb,F11r,Smad1,Smad2,Smad3,Smad4,Smad5,Smad6,Smad7,Men1,Nedd8,Fstl3,Nog,Furin,Prkcz,Ppm1a,Ccnc,Ube2d1,Rbl1,Skil,Ncor2,Sp1,Strap,Tfdp1,Tgfb1,Tgfbr1,Tgfbr2,Tgif1,Zfyve16,Uba52,Ubb,Ube2m,Usp9x,Stub1,Pard6a,Grem…
Cross-presentation of soluble exogenous antigens (endosomes)	2.05951	0.0205299	Psmd6,Psmd12,Psmd5,Psmc6,Psmd9,Psmd11,Psmd1,Psme4,Psmb11,Fcgr1,Psmb9,Psmb8,Psmd7,Mrc1,Mrc2,Psma2,Psma3,Psmb1,Psmb10,Psmb4,Psmb5,Psmb6,Psmb7,Psmc1,Psmc2,Psmc3,Psmc5,Psmd4,Psme1,Psme2,Psme3,Psmd10,Psmd2,Psmd3,Psmc4,Psmd13,Psmd8,Psmd14,Psma1,Psma4,Psma5,Psma6,Psma7,Psmb2,Psmb3,Psmf1
mRNA Splicing - Minor Pathway	2.04985	0.0206922	Sf3b6,Sf3b5,Polr2e,Polr2l,Snrnp40,Zmat5,Zcrb1,Rnpc3,Snrpd3,Polr2b,Polr2g,Snrnp48,Srsf6,Snrpg,Ncbp2,Gtf2f2,Prpf6,Sf3b3,Polr2d,Polr2f,Snrpf,Polr2i,Ddx42,Ncbp1,Ddx23,Snrpd2,Sf3b4,Snrnp35,Srsf1,Snrnp25,Polr2h,Polr2k,Polr2a,Polr2c,Srsf2,Eftud2,Snrpb,Snrpd1,Snrpe,Snu13,Ybx1,Sf3b2,Snrnp200,Txnl4a,Lsm2,Prpf8,Srsf7,Gtf2f1
DNA Double Strand Break Response	2.07145	0.0207643	Kdm4a,H4c17,Babam1,H4c8,Rnf168,Ube2v2,Abraxas1,Nsd2,Babam2,Mdc1,Abl1,Apbb1,Atm,Rps27a,Eya3,Brcc3,Herc2,H2ax,Kat5,Kpna2,Mre11a,Chek2,Ppp5c,Uimc1,Trp53,Uba52,Ubb,Ube2i,Sumo1,Baz1b,H4c11,H2bc11,H2bc3,H2bc21,Rnf8,Pias4,Mapk8,Trp53bp1,Nbn,Smarca5,Ube2n,Kdm4b,H4c14
Nuclear Events (kinase and transcription factor activation)	2.03648	0.0210791	Dusp6,Vrk3,Dusp7,Dusp3,Rps6ka5,Chd4,Atf1,Creb1,Mapkapk2,Nab2,Ppp2r1a,Ppp2ca,Ppp2cb,Sgk1,Srf,Mapk7,Dusp4,Mapk1,Mapk14,Mapk3
Sealing of the nuclear envelope (NE) by ESCRT-III	2.04284	0.0210791	Chmp4c,Chmp3,Tubb6,Chmp2b,Chmp2a,Ist1,Chmp7,Tubb2b,Tubal3,Chmp4b,Chmp6,Spast,Vps4a,Tuba1a,Tuba1b,Tuba4a,Tubb3,Cc2d1b,Lemd2,Tubb4b
N-glycan antennae elongation in the medial/trans-Golgi	2.03507	0.0210791	Mgat4c,Chst8,Mgat4b,Fuca1,Mgat4a,Man2a2,Mgat5,B4galt1,Man2a1,St6gal1,St3gal4,St8sia2,St8sia3,B4galt2,Fut8,Mgat2,B4galt5,B4galt4,B4galt6,B4galt3
Peroxisomal lipid metabolism	2.0674	0.0210814	Acot8,Acot4,Crot,Acoxl,Ehhadh,Acbd5,Acox1,Abcd1,Aldh3a2,Nudt19,Pecr,Crat,Acox3,Hsd17b4,Phyh,Amacr,Scp2,Slc25a17,Mlycd,Eci2,Decr2,Slc27a2
TRAF6 mediated induction of NFkB and MAP kinases upon TLR7/8 or 9 activation	1.97074	0.0210814	Tab1,Ube2v1,Peli1,Tnip2,Dusp6,Tab2,Vrk3,Nkiras1,Mapkapk3,Fbxw11,Dusp7,Nkiras2,Dusp3,Rps6ka5,Ticam1,Nod1,Irak2,App,Atf1,Atf2,Cd14,Rps27a,Creb1,Fos,Hmgb1,Ikbkb,Ikbkg,Irak1,Jun,Ly96,Mapkapk2,Nfkb1,Nfkb2,Nfkbia,Nfkbib,Ppp2r1a,Ppp2ca,Ppp2cb,Rela,S100b,Skp1,Tlr4,Traf6,Uba52,Ubb,Mapk7,Dusp4,Map2k3,Map2k4,Map2k6,Map2k7,Map3k7,Map3k8,Mapk1,Mapk10,Mapk14,Mapk3,Mapk8,Mapk9,Ecsit,Cul1,Ube2n,Peli2,Ripk2
Gap junction trafficking	2.0893	0.0214296	Cltc,Tubb6,Tubb2b,Cltb,Tubal3,Actb,Actg1,Ap2m1,Dab2,Dnm1,Dnm2,Gja1,Gja4,Gjc1,Gjb1,Gjb2,Gjb3,Gjb4,Gjb5,Gjb6,Gjc2,Tuba1a,Tuba1b,Tuba4a,Tubb3,Tubb4b
Ion homeostasis	2.1151	0.0215048	Ahcyl1,Atp1a2,Asph,Atp2b1,Atp1a3,Camk2d,Sri,Atp1a1,Atp1b1,Atp1b2,Atp1b3,Atp2a1,Atp2a2,Atp2b2,Calm1,Calm2,Calm3,Camk2b,Camk2g,Dmpk,Itpr1,Itpr2,Itpr3,Fxyd3,Prkaca,Ryr1,Ryr3,Slc8a1,Atp2a3,Atp2b4,Stim1,Abcc9,Tnni3,Fxyd1,Fxyd7
Platelet homeostasis	2.00789	0.0216719	Gng11,Pafah2,P2rx2,Atp2b1,Apob,Pde2a,Sri,Atp2a1,Atp2a2,Atp2b2,Pde11a,Calm1,Calm2,Calm3,Pde5a,Fgr,Gnas,Gnb1,Gnb2,Gnb4,Gnb5,Gng10,Gng2,Gng4,Gng5,Gngt2,Ptpn6,Itpr1,Itpr2,Itpr3,Irag1,Nos2,Nos3,P2rx1,P2rx7,P2rx6,Pde1a,Pde1b,Pde9a,Pecam1,Pla2g4a,Ppp2r1a,Ppp2ca,Ppp2cb,Prkg1,Ptpn11,Slc8a1,Atp2a3,Atp2b4,Mapk14,Ppp2r5c,Ppp2r5e,P2rx5,Ppp2r5b,Ppp2r5a,Gng13
RAC3 GTPase cycle	1.92081	0.0219746	Lbr,Vangl1,Lamtor1,Baiap2l1,Abi2,Taok3,Brk1,Arhgap32,Arhgap35,Garre1,Vrk2,Lman1,Arhgap17,Pak4,Pgrmc2,Arhgap26,Arhgap21,Arhgap42,Cdc42ep1,Noxo1,Rac3,Amigo2,Nckap1l,Arap3,Rapgef1,Baiap2,Mpp7,Abi1,Abr,Arhgap6,Arhgdib,Noxa1,Bcr,Cav1,Cdc42,Cyba,Cybb,Wasf2,Dsg2,Dock10,Epha2,Srgap2,Prex1,Itgb1,Jag1,Ncf1,Ncf2,Nckap1,Mcam,Pik3r1,Pik3r2,Rab7,Stbd1,Lemd3,Git1,Cyfip1,Snap23,Swap70,Depdc1b,Tfrc,Vamp3,Vav2,Fer…
Synthesis of glycosylphosphatidylinositol (GPI)	-1.83287	0.0221411	Pigl,Pigyl,Pigv,Pigc,Pigm,Pigw,Pigx,Pigg,Pigz,Pigh,Dpm2,Pigq,Piga,Pigf,Pigb,Pigp
Resolution of Abasic Sites (AP sites)	-1.78676	0.0232001	Pole4,Adprs,Rpa3,Rpa1,Rfc3,Pold4,Mutyh,Smug1,Mpg,Rfc5,Neil1,Rfc4,Parp2,Apex1,Lig1,Mbd4,Nthl1,Ogg1,Pcna,Polb,Pold1,Pold2,Pole,Pole2,Rfc1,Rfc2,Tdg,Ung,Neil2,Xrcc1,Pole3
FCERI mediated MAPK activation	2.04863	0.0238098	Plcg2,Fcer1g,Fos,Grb2,Hras,Jun,Kras,Lat,Lcp2,Lyn,Grap2,Plcg1,Rac1,Shc1,Sos1,Syk,Vav1,Vav2,Map2k4,Map2k7,Mapk1,Mapk10,Mapk3,Mapk8,Mapk9,Pak2
Activation of kainate receptors upon glutamate binding	2.0358	0.0238838	Gng11,Calm1,Calm2,Calm3,Dlg1,Dlg4,Gnb1,Gnb2,Gnb4,Gnb5,Gng10,Gng2,Gng4,Gng5,Gngt2,Grik3,Grik5,Plcb1,Plcb2,Plcb3,Ncald,Dlg3,Gng13
RAF-independent MAPK1/3 activation	2.00892	0.0246992	Dusp6,Dusp16,Dusp7,Dusp5,Cdk1,Il6,Il6ra,Il6st,Jak2,Dusp8,Pea15a,Ptpn11,Dusp1,Tyk2,Dusp4,Map2k1,Map2k2,Mapk1,Mapk3,Dusp10
Glutamate Neurotransmitter Release Cycle	-1.78794	0.0247551	Ppfia2,Slc38a2,Ppfia4,Ppfia1,Slc17a7,Tspoap1,Ppfia3,Slc1a7,Gls,Rab3a,Slc1a1,Stx1a,Stxbp1,Syt1,Unc13b,Vamp2,Arl6ip5
Signaling by FGFR2	1.98354	0.0252545	Frs2,Hnrnpf,Polr2e,Polr2l,Polr2b,Polr2g,Ncbp2,Gtf2f2,Polr2d,Polr2f,Polr2i,Fgfbp3,Ncbp1,Esrp1,Hnrnpm,Braf,Esrp2,Cbl,Rps27a,Fgf2,Fgf7,Fgf9,Fgfbp1,Fgfr2,Gab1,Grb2,Hnrnpa1,Hras,Polr2h,Kras,Mknk1,Polr2k,Pik3ca,Pik3r1,Plcg1,Ppp2r1a,Ppp2ca,Ppp2cb,Ptpn11,Polr2a,Polr2c,Shc1,Sos1,Src,Tia1,Tial1,Uba52,Ubb,Spry2,Hnrnph1,Mapk1,Mapk3,Rbfox2,Gtf2f1
Conversion from APC/C:Cdc20 to APC/C:Cdh1 in late anaphase	1.98785	0.0260123	Cdc14a,Anapc11,Anapc2,Cdc26,Ube2c,Anapc10,Cdc16,Cdc20,Anapc15,Ube2s,Anapc1,Anapc4,Ube2d1,Cdc23,Anapc16,Cdc27,Ube2e1,Anapc7,Fzr1,Anapc5
Metabolism of vitamins and cofactors	1.72074	0.0260123	Coq3,Parp4,Nmnat1,Ppcdc,Pccb,Mmachc,Slc25a19,Parp6,Aasdhppt,Slc5a6,Nudt12,Lmbrd1,Mocos,Nadk2,Naxd,Mocs3,Nmrk2,Vkorc1l1,Slc52a3,Slc22a13,Slc25a32,Pnpo,Pdss2,Ubiad1,Coasy,Coq2,Gpc2,Gphn,Mccc1,Bco2,Pdzd11,Thtpa,Pank4,Slc25a16,Ppcs,Mthfd1l,Nmnat3,Apob,Pank2,Mtr,Acaca,Aldh1l1,Mthfs,Shmt2,Mthfd1,Plb1,Lrp12,Mthfd2l,Pank1,Mmadhc,Mmaa,Cyb5a,Acp5,Cyb5r3,Clps,Akt1,Apoa1,Apoa4,Apoc2,Apoc3,Apoe,Akr1b7,Mmab,Bs…
Switching of origins to a post-replicative state	1.86871	0.0260123	Anapc11,Anapc2,Psmd6,Cdc26,Psmd12,Psmd5,Psmc6,Psmd9,Cdt1,Ube2c,Anapc10,Psmd11,Cdc16,Psmd1,Psme4,Psmb11,Anapc15,Ube2s,Ccne1,Ccne2,Cdk2,Rps27a,Psmb9,Psmb8,Mcm3,Mcm2,Mcm4,Mcm5,Mcm6,Mcm7,Anapc1,Psmd7,Orc3,Orc1,Orc2,Psma2,Psma3,Psmb1,Psmb10,Psmb4,Psmb5,Psmb6,Psmb7,Psmc1,Psmc2,Psmc3,Psmc5,Psmd4,Psme1,Psme2,Psme3,Anapc4,Ube2d1,Cdc23,Anapc16,Psmd10,Cdc27,Skp1,Psmd2,Psmd3,Uba52,Ubb,Ube2e1,Anapc7,Fzr1,Rbx1…
MET activates PTK2 signaling	2.01022	0.0260123	Col11a2,Col3a1,Col5a1,Col5a2,Col1a1,Col1a2,Col27a1,Ptk2,Fn1,Hgf,Itga2,Itga3,Itgb1,Lama1,Lama2,Lama3,Lama4,Lama5,Lamb1,Lamb2,Lamb3,Src,Col5a3
Regulation of PTEN gene transcription	1.99942	0.0260123	Gatad2b,Lamtor4,Lamtor1,Sall4,Rraga,Lamtor5,Maf1,Gatad2a,Slc38a9,Hdac1,Chd4,Bmi1,Cbx4,Phc3,Phc1,Eed,Mecom,Ezh2,Hdac2,Rbbp7,Mbd3,Lamtor2,Mta3,Rragd,Rbbp4,Rheb,Ring1,Rnf2,Suz12,Chd3,Rragc,Phc2,Lamtor3,Mta2,Mlst8,Mtor,Scmh1,Cbx8
Signal amplification	2.005	0.0263885	Gng11,P2ry12,Gnat3,Gna11,Gna13,Gna14,Gnai1,Gnai2,Gnai3,Gnaq,Gnb1,Gnb2,Gnb4,Gnb5,Gng10,Gng2,Gng4,Gng5,Gngt2,P2ry1,Pla2g4a,Src,Tbxa2r,Mapk14,Aamp,Gng13
Toll Like Receptor 9 (TLR9) Cascade	1.89933	0.0266655	Tab1,Ube2v1,Peli1,Tnip2,Dusp6,Tab2,Vrk3,Nkiras1,Mapkapk3,Fbxw11,Dusp7,Nkiras2,Dusp3,Rps6ka5,Ticam1,Nod1,Pik3r4,Irak2,App,Atf1,Atf2,Cd14,Rbsn,Rps27a,Creb1,Fos,Hmgb1,Ikbkb,Ikbkg,Irak1,Tlr9,Jun,Ly96,Mapkapk2,Nfkb1,Nfkb2,Nfkbia,Nfkbib,Ppp2r1a,Ppp2ca,Ppp2cb,Eea1,Rela,S100b,Irf7,Skp1,Tlr4,Traf6,Uba52,Ubb,Mapk7,Dusp4,Map2k3,Map2k4,Map2k6,Map2k7,Map3k7,Map3k8,Mapk1,Mapk10,Mapk14,Mapk3,Mapk8,Mapk9,Ecsit,C…
RNA Polymerase II Pre-transcription Events	1.90024	0.0266655	Gtf2b,Wdr61,Polr2e,Taf12,Gtf2h5,Polr2l,Ccnh,Taf13,Polr2b,Ctdp1,Elob,Polr2g,Eloc,Ncbp2,Gtf2e2,Gtf2f2,Taf11,Polr2d,Polr2f,Polr2i,Mllt3,Taf15,Gtf2a2,Leo1,Taf4b,Ccnt2,Ncbp1,Iws1,Taf1,Gtf2e1,Eaf1,Cdk9,Taf9,Rtf1,Ccnt1,Cdk7,Gtf2h3,Taf3,Ell,Ercc2,Ercc3,Taf9b,Gtf2h1,Supt16,Polr2h,Mnat1,Polr2k,Cdc73,Gtf2a1,Polr2a,Polr2c,Ssrp1,Supt4a,Supt5,Supt6,Taf6,Tbp,Tcea1,Paf1,Ctr9,Gtf2h2,Taf7,Taf10,Nelfa,Nelfcd,Nelfb,…
Glycosphingolipid metabolism	2.00046	0.0269361	Gba2,Sumf2,Arsg,Glb1l,Neu4,Arsa,Asah1,Glb1,Smpd4,Galc,B4galnt1,Gba,Gm2a,Hexa,Hexb,Neu1,Neu3,Ctsa,Psap,Esyt2,Smpd1,Smpd2,Asah2,Ugcg,Gltp,Esyt1,Sumf1,Smpd3,Cerk
Molecules associated with elastic fibres	2.0051	0.0272859	Mfap1a,Emilin1,Ltbp1,Ltbp4,Mfap4,Itga8,Bmp2,Bmp4,Bmp7,Eln,Fbln2,Fbn1,Fn1,Itgav,Itgb1,Itgb3,Itgb5,Itgb6,Ltbp2,Ltbp3,Mfap2,Emilin2,Mfap5,Mfap3,Tgfb1,Fbln5,Efemp2
M Phase	1.49948	0.028167	Lbr,Cenpe,Ska2,Anapc11,Cep152,Cenpp,Blzf1,Chmp4c,Anapc2,Psmd6,Tubgcp6,Cdc26,Spc25,Haus6,Cenpm,Golga2,Rae1,Chmp3,Dsn1,Nuf2,Psmd12,Psmd5,Pmf1,Ndc80,Psmc6,Mis12,Fbxo5,Psmd9,Ctdnep1,Nupl2,Nde1,Haus3,Rcc1,H4c17,Spc24,Itgb3bp,Cdca5,Pds5b,Tubb6,Kmt5a,Zwilch,Dynll2,Akap9,Ncapd2,Ssna1,Sgo2a,H2aj,Ube2c,Ccp110,Numa1,Chmp2b,Chmp2a,Anapc10,Psmd11,B9d2,H4c8,Tubgcp5,Nup35,Dctn2,Nup37,Nup43,Vrk2,Cdc16,Smc4,Goras…
Synthesis of very long-chain fatty acyl-CoAs	1.96192	0.028167	Hacd4,Elovl5,Hacd2,Elovl6,Acsl5,Tecr,Acsl3,Elovl7,Acsl1,Acsl4,Elovl1,Hsd17b12,Hacd3,Acsf3,Hacd1
Neurotransmitter release cycle	-1.75913	0.0282155	Ppfia2,Naaa,Slc38a2,Ppfia4,Ppfia1,Abat,Slc17a7,Lin7a,Tspoap1,Ppfia3,Cask,Dnajc5,Slc1a7,Gad2,Gls,Hspa8,Maoa,Slc18a2,Aldh5a1,Rab3a,Slc1a1,Slc22a1,Slc22a2,Stx1a,Stxbp1,Syt1,Unc13b,Vamp2,Lin7b,Lin7c,Slc32a1,Apba1,Arl6ip5
Ca2+ pathway	1.96656	0.0282155	Gng11,Calm1,Calm2,Calm3,Ctnnb1,Fzd4,Fzd5,Fzd6,Gnao1,Gnb1,Gnb2,Gnb4,Gnb5,Gng10,Gng2,Gng4,Gng5,Gngt2,Kras,Lef1,Nlk,Pde6g,Plcb1,Plcb2,Plcb3,Ppp3ca,Ppp3cb,Ppp3r1,Tcf7l2,Wnt11,Wnt5a,Fzd2,Map3k7,Gng13
TNF signaling	1.95834	0.0282155	Tab1,Sppl2a,Bag4,Tab2,Tradd,Rnf31,Otulin,Sppl2b,Sharpin,Cyld,Clip3,Adam17,Birc3,Birc2,Xiap,Casp8,Cflar,Rps27a,Fadd,Rack1,Ikbkb,Ikbkg,Nsmaf,Tax1bp1,Ripk1,Smpd2,Usp2,Tnfaip3,Tnfrsf1a,Traf1,Traf2,Uba52,Ubb,Usp4,Rbck1,Smpd3,Map3k7,Usp21,Madd
Elastic fibre formation	2.00872	0.0283867	Mfap1a,Loxl4,Emilin1,Ltbp1,Ltbp4,Mfap4,Itga8,Bmp2,Bmp4,Bmp7,Eln,Fbln2,Fbn1,Fn1,Itga5,Itgav,Itgb1,Itgb3,Itgb5,Itgb6,Loxl1,Ltbp2,Ltbp3,Mfap2,Emilin2,Mfap5,Furin,Mfap3,Tgfb1,Fbln5,Efemp2,Loxl2
Activation of the pre-replicative complex	-1.75031	0.0287131	Pole4,Cdt1,Rpa3,Rpa1,Mcm10,Cdc45,Cdc7,Cdk2,Mcm3,Mcm2,Mcm4,Mcm5,Mcm6,Mcm7,Orc3,Orc1,Orc2,Pola1,Pola2,Pole,Pole2,Cdc6,Gmnn,Pole3,Orc4,Orc5,Dbf4
RIPK1-mediated regulated necrosis	1.99523	0.0296586	Peli1,Tradd,Mlkl,Ogt,Birc3,Birc2,Xiap,Casp8,Cdc37,Cflar,Rps27a,Fadd,Fas,Flot1,Flot2,Hsp90aa1,Pdcd6ip,Ripk1,Sdcbp,Tnfrsf10b,Traf2,Tnfsf10,Uba52,Ubb,Stub1,Ripk3
Regulation of necroptotic cell death	1.99523	0.0296586	Peli1,Tradd,Mlkl,Ogt,Birc3,Birc2,Xiap,Casp8,Cdc37,Cflar,Rps27a,Fadd,Fas,Flot1,Flot2,Hsp90aa1,Pdcd6ip,Ripk1,Sdcbp,Tnfrsf10b,Traf2,Tnfsf10,Uba52,Ubb,Stub1,Ripk3
Inhibition of the proteolytic activity of APC/C required for the onset of anaphase by mitotic spindle checkpoint components	1.94963	0.0298828	Anapc11,Anapc2,Cdc26,Ube2c,Anapc10,Cdc16,Cdc20,Anapc15,Bub1b,Bub3,Ube2s,Anapc1,Anapc4,Ube2d1,Cdc23,Anapc16,Cdc27,Ube2e1,Mad2l1,Anapc7,Anapc5
Inactivation of APC/C via direct inhibition of the APC/C complex	1.94963	0.0298828	Anapc11,Anapc2,Cdc26,Ube2c,Anapc10,Cdc16,Cdc20,Anapc15,Bub1b,Bub3,Ube2s,Anapc1,Anapc4,Ube2d1,Cdc23,Anapc16,Cdc27,Ube2e1,Mad2l1,Anapc7,Anapc5
Semaphorin interactions	1.92542	0.0301335	Plxnd1,Arhgap35,Plxnb1,Rhoa,Rhob,Rhoc,Cdk5,Crmp1,Dpysl2,Erbb2,Fes,Fyn,Plxna4,Hsp90ab1,Hsp90aa1,Limk1,Arhgef11,Nrp1,Sema6d,Pip5k1c,Plxna1,Plxna2,Ptprc,Rac1,Rock1,Rock2,Rras,Sema3e,Sema4a,Sema4d,Sema7a,Tln1,Plxnc1,Tyrobp,Dpysl3,Gsk3b,Pak2,Farp2
Myogenesis	1.9564	0.0304727	Spag9,Abl1,Bnip2,Ctnna1,Ctnnb1,Cdc42,Mef2a,Mef2c,Mef2d,Myog,Boc,Tcf12,Tcf4,Tcf3,Cdon,Mapk14,Mapk12
RHOBTB1 GTPase cycle	1.94854	0.0306599	Rhobtb1,Cpsf7,Stk38,Rnf20,Cct2,Cct7,Pde5a,Cops2,Hnrnpc,Srrm1,Rbbp6,Rbmx,Rock1,Rock2,Tra2b,Txnl1,Vim,Dbn1,Spen,Cul3,Cops4
Cell Cycle, Mitotic	1.43693	0.0310042	Lbr,Dna2,Cdc14a,Cenpe,Ska2,Anapc11,Cep152,Cenpp,Blzf1,Chmp4c,Anapc2,Psmd6,Tubgcp6,Cdc26,Spc25,Haus6,Cenpm,Golga2,Ccnh,Rae1,Chmp3,Dsn1,Nuf2,Pole4,Psmd12,Psmd5,Pmf1,Ndc80,Psmc6,Mis12,Fbxo5,Psmd9,Cdt1,Ctdnep1,Nupl2,Nde1,Haus3,Rcc1,H4c17,Spc24,Lin54,Itgb3bp,Cdca5,Pds5b,Tubb6,Kmt5a,Zwilch,Dynll2,Akap9,Rpa3,Rpa1,Ncapd2,Ssna1,Sgo2a,H2aj,Ube2c,Ccp110,Numa1,Chmp2b,Chmp2a,Anapc10,Psmd11,B9d2,Rfc3,H4c8,Tubg…
G2/M Transition	1.68657	0.0311206	Cep152,Psmd6,Tubgcp6,Haus6,Ccnh,Psmd12,Psmd5,Psmc6,Psmd9,Nde1,Haus3,Tubb6,Akap9,Ssna1,Ccp110,Psmd11,Tubgcp5,Dctn2,Psmd1,Psme4,Cep192,Xpo1,Fbxw11,Tubg1,Csnk1d,Optn,Haus5,Ppp2r2a,Mzt2,Ccnb1,Tpx2,Pkmyt1,Alms1,Ppme1,Ofd1,Tubb2b,Haus7,Psmb11,Tubgcp2,Cep57,Cep72,Tubal3,Ckap5,Haus8,Clasp1,Mzt1,Sdccag8,Bora,Ccnb2,Cdc25a,Cdc25b,Cdc25c,Cdk1,Cdk11b,Cdk2,Cdk7,Cdkn1a,Rps27a,Dctn1,Sfi1,Dync1h1,Dync1i2,Mapre1,H…
Complement cascade	1.93594	0.031426	Colec10,C7,C8b,Serping1,C1qa,C1qb,C1qc,C2,C3,C3ar1,C4b,C5ar1,Cd81,Cfh,Cfi,Clu,Crp,Fcna,Masp2,C1ra,Cfp
ADP signalling through P2Y purinoceptor 1	1.93721	0.0314278	Gng11,Gna11,Gna14,Gnaq,Gnb1,Gnb2,Gnb4,Gnb5,Gng10,Gng2,Gng4,Gng5,Gngt2,P2ry1,Pla2g4a,Src,Mapk14,Gng13
DAP12 signaling	1.91498	0.0331313	Plcg2,Pik3cb,B2m,Btk,H2-Q6,Gm8909,Fyn,Grb2,H2-K1,H2-M3,H2-M9,H2-Q1,H2-Q10,H2-T23,H2-T24,Hras,Kras,Lat,Lck,Lcp2,Grap2,Pik3ca,Pik3r1,Pik3r2,Plcg1,Rac1,Shc1,Sos1,Syk,Tyrobp,Vav2,Gm11127
Opioid Signalling	1.87016	0.0335275	Gng11,Adcy3,Adcy4,Adcy1,Pde4d,Camkk2,Adcy6,Adcy7,Adcy8,Adcy9,Grk2,Pde4c,Calm1,Calm2,Calm3,Cdk5,Gnat3,Gna11,Gna14,Gnai1,Gnai2,Gnai3,Gnal,Gnaq,Gnb1,Gnb2,Gnb4,Gnb5,Gng10,Gng2,Gng4,Gng5,Gngt2,Pde1a,Pde1b,Pde1c,Pde4a,Pde4b,Prkaca,Prkacb,Prkca,Prkcd,Pla2g4a,Plcb1,Plcb2,Plcb3,Plcb4,Pomc,Ppp2r1a,Ppp1ca,Ppp1r1b,Ppp2ca,Ppp2cb,Prkar1a,Prkar1b,Prkar2b,Camkk1,Mapk1,Adcy5,Gng13
Mitotic G2-G2/M phases	1.67084	0.0341764	Cep152,Psmd6,Tubgcp6,Haus6,Ccnh,Psmd12,Psmd5,Psmc6,Psmd9,Nde1,Haus3,Tubb6,Akap9,Ssna1,Ccp110,Psmd11,Tubgcp5,Dctn2,Psmd1,Psme4,Cep192,Xpo1,Fbxw11,Tubg1,Csnk1d,Optn,Haus5,Ppp2r2a,Mzt2,Ccnb1,Tpx2,Pkmyt1,Alms1,Ppme1,Ofd1,Tubb2b,Haus7,Psmb11,Tubgcp2,Cep57,Cep72,Tubal3,Ckap5,Haus8,Clasp1,Mzt1,Sdccag8,Bora,Ccnb2,Cdc25a,Cdc25b,Cdc25c,Cdk1,Cdk11b,Cdk2,Cdk7,Cdkn1a,Rps27a,Dctn1,Sfi1,Dync1h1,Dync1i2,E2f3,Map…
Signaling by FGFR	1.84609	0.0361311	Frs2,Hnrnpf,Polr2e,Polr2l,Polr2b,Polr2g,Ncbp2,Gtf2f2,Polr2d,Polr2f,Polr2i,Flrt3,Flrt2,Fgfbp3,Ncbp1,Esrp1,Hnrnpm,Braf,Esrp2,Cbl,Rps27a,Fgf15,Fgf2,Fgf7,Fgf9,Fgfbp1,Fgfr1,Fgfr2,Gab1,Galnt3,Grb2,Hnrnpa1,Hras,Spred1,Spred2,Polr2h,Kras,Mknk1,Polr2k,Fgfrl1,Pik3ca,Pik3r1,Plcg1,Ppp2r1a,Ppp2ca,Ppp2cb,Ptpn11,Polr2a,Polr2c,Shc1,Sos1,Src,Tia1,Tial1,Uba52,Ubb,Spry2,Hnrnph1,Mapk1,Mapk3,Rbfox2,Gtf2f1
APC/C:Cdc20 mediated degradation of Cyclin B	1.89284	0.0364892	Anapc11,Anapc2,Cdc26,Ube2c,Anapc10,Cdc16,Ccnb1,Cdc20,Anapc15,Ube2s,Cdk1,Rps27a,Anapc1,Anapc4,Ube2d1,Cdc23,Anapc16,Cdc27,Uba52,Ubb,Ube2e1,Anapc7,Anapc5
APC-Cdc20 mediated degradation of Nek2A	1.8982	0.0366219	Anapc11,Anapc2,Cdc26,Ube2c,Anapc10,Cdc16,Cdc20,Anapc15,Bub1b,Bub3,Ube2s,Rps27a,Anapc1,Nek2,Anapc4,Ube2d1,Cdc23,Anapc16,Cdc27,Uba52,Ubb,Ube2e1,Mad2l1,Anapc7,Anapc5
Interleukin-3, Interleukin-5 and GM-CSF signaling	1.87533	0.0366219	Pik3cb,Rapgef1,Cbl,Rps27a,Crk,Crkl,Csf2ra,Fyn,Grb2,Hck,Ptpn6,Il2rb,Il2rg,Inpp5d,Jak2,Jak3,Lyn,Pik3ca,Pik3cd,Pik3r1,Pik3r2,Pik3r3,Prkaca,Ptpn11,Shc1,Sos1,Stat5a,Stat5b,Syk,Tec,Uba52,Ubb,Vav1,Yes1,Ywhaz
Telomere C-strand (Lagging Strand) Synthesis	-1.69485	0.0367083	Dna2,Rpa3,Rpa1,Pot1a,Ctc1,Rfc3,Ten1,Pold4,Acd,Rfc5,Rfc4,Stn1,Blm,Lig1,Chtf18,Chtf8,Pcna,Pola1,Pola2,Pold1,Pold2,Rfc1,Rfc2,Terf1,Terf2,Wrn,Terf2ip
Mitotic G1 phase and G1/S transition	1.69198	0.0371818	Psmd6,Ccnh,Pole4,Psmd12,Psmd5,Psmc6,Psmd9,Cdt1,Lin54,Rpa3,Rpa1,Psmd11,Mcm10,Psmd1,E2f4,Ppp2r2a,Hdac1,Lin37,Abl1,Akt1,Akt2,Ccnd1,Ccnd2,Ccnd3,Ccne1,Ccne2,Cdc25a,Cdc45,Cdc7,Cdk2,Cdk4,Cdk6,Cdk7,Cdkn1a,Cdkn1b,Cdkn1c,Cdkn2b,Rps27a,E2f2,Dyrk1a,E2f3,E2f5,Jak2,Psmb9,Psmb8,Lyn,Mcm3,Mcm2,Mcm4,Mcm5,Mcm6,Mcm7,Mnat1,Psmd7,Orc3,Orc1,Orc2,Pola1,Pola2,Pole,Pole2,Ppp2r1a,Ppp2ca,Ppp2cb,Psma2,Psma3,Psmb1,Psmb10,Psmb…
Transcriptional activity of SMAD2/SMAD3:SMAD4 heterotrimer	1.85997	0.0372512	Ube2d3,Smurf2,Snw1,Cdk8,E2f4,Ccnt2,Hdac1,Cdk9,Ccnt1,Rps27a,E2f5,Smad2,Smad3,Smad4,Smad7,Men1,Ppm1a,Ccnc,Ube2d1,Rbl1,Skil,Ncor2,Sp1,Tfdp1,Tgif1,Uba52,Ubb,Usp9x,Mapk1,Mapk3,Rnf111,Trim33,Wwtr1,Tgif2
Glucagon-like Peptide-1 (GLP1) regulates insulin secretion	1.88507	0.0372512	Gng11,Kcns3,Rap1a,Gcg,Gnas,Gnb1,Gnb2,Gnb4,Gnb5,Gng10,Gng2,Gng4,Gng5,Gngt2,Itpr1,Itpr2,Itpr3,Prkaca,Prkacb,Rapgef3,Gng13
Stimuli-sensing channels	1.83507	0.0407311	Asph,Clca4b,Mcoln2,Wnk1,Trpm4,Ano1,Ano10,Tpcn2,Ano9,Sgk3,Ano6,Mlkl,Wwp1,Wnk2,Nalcn,Sri,Ano7,Asic2,Asic4,Raf1,Calm1,Calm2,Calm3,Clcn2,Clcn4,Clcn5,Clcnka,Rps27a,Ttyh3,Stom,Tsc22d3,Ostm1,Ttyh2,Ripk1,Ryr1,Ryr3,Scnn1a,Sgk1,Uba52,Ubb,Trpv2,Clcnkb,Tpcn1,Trpc4ap,Ripk3,Clca1,Trpm5,Best1,Trpm7,Clcn6,Clcn7,Sgk2,Mcoln1
Thromboxane signalling through TP receptor	1.84875	0.0407311	Gng11,Gna11,Gna13,Gna14,Gnaq,Gnb1,Gnb2,Gnb4,Gnb5,Gng10,Gng2,Gng4,Gng5,Gngt2,Tbxa2r,Aamp,Gng13
Mitotic Prophase	1.76141	0.0407311	Blzf1,Golga2,Rae1,Ctdnep1,Nupl2,H4c17,Kmt5a,H2aj,Numa1,H4c8,Nup35,Nup37,Nup43,Smc4,Gorasp2,Nup107,Nup133,Nup93,Nupl1,Ccnb1,Seh1l,Nup155,Nup54,Ndc1,Nup98,Gorasp1,Pom121,Ncapg2,Tpr,Rab1b,H2az2,Sec13,Ccnb2,Cdk1,Ncapd3,Smc2,Lpin1,Mcph1,H2ac18,H2ax,Lmna,Lmnb1,Nup50,Nup62,Prkca,Plk1,Nup85,H2az1,Nup88,Rab1a,Ranbp2,Rb1,Ncaph2,Lemd3,Nek9,Cnep1r1,Nup153,Nup210,Set,Ensa,H4c11,H2ac10,H2bc11,H2bc3,H2bc21,Phf8…
SMAD2/SMAD3:SMAD4 heterotrimer regulates transcription	1.84672	0.0408078	Cdk8,E2f4,Ccnt2,Cdk9,Ccnt1,Rps27a,E2f5,Smad2,Smad3,Smad4,Smad7,Men1,Ccnc,Rbl1,Sp1,Tfdp1,Uba52,Ubb,Mapk1,Mapk3,Rnf111,Wwtr1
CDT1 association with the CDC6:ORC:origin complex	1.83955	0.0412604	Psmd6,Psmd12,Psmd5,Psmc6,Psmd9,Cdt1,Psmd11,Psmd1,Psme4,Psmb11,Rps27a,Psmb9,Psmb8,Psmd7,Orc3,Orc1,Orc2,Psma2,Psma3,Psmb1,Psmb10,Psmb4,Psmb5,Psmb6,Psmb7,Psmc1,Psmc2,Psmc3,Psmc5,Psmd4,Psme1,Psme2,Psme3,Psmd10,Psmd2,Psmd3,Uba52,Ubb,Cdc6,Psmc4,Psmd13,Psmd8,Gmnn,Psmd14,Orc4,Orc5,Psma1,Psma4,Psma5,Psma6,Psma7,Psmb2,Psmb3,Psmf1
Deposition of new CENPA-containing nucleosomes at the centromere	1.80841	0.0416036	Cenpw,Cenpp,Cenpm,Mis18a,H4c17,Itgb3bp,H2aj,H4c8,Rsf1,Cenpu,Cenpn,H2az2,Cenpa,Cenpc1,H2ac18,H2ax,Rbbp7,Npm1,H2az1,Rbbp4,Cenpo,Hjurp,Cenpx,Mis18bp1,Ruvbl1,H4c11,H2ac10,H2bc11,H2bc3,H2bc21,Cenpt,Cenph,Smarca5,H4c14
Nucleosome assembly	1.80841	0.0416036	Cenpw,Cenpp,Cenpm,Mis18a,H4c17,Itgb3bp,H2aj,H4c8,Rsf1,Cenpu,Cenpn,H2az2,Cenpa,Cenpc1,H2ac18,H2ax,Rbbp7,Npm1,H2az1,Rbbp4,Cenpo,Hjurp,Cenpx,Mis18bp1,Ruvbl1,H4c11,H2ac10,H2bc11,H2bc3,H2bc21,Cenpt,Cenph,Smarca5,H4c14
NOD1/2 Signaling Pathway	1.82853	0.0420349	Tab1,Ube2v1,Tab2,Cyld,Nod1,Irak2,Birc3,Birc2,Casp1,Casp4,Casp2,Casp8,Casp9,Rps27a,Ikbkb,Ikbkg,Irak1,Itch,Tnfaip3,Traf6,Uba52,Ubb,Map2k6,Map3k7,Mapk13,Mapk14,Ube2n,Ripk2,Mapk12,Aamp
RHOD GTPase cycle	1.83385	0.0420804	Lbr,Vangl1,Golga2,Steap3,Arhgap32,Hint2,Arhgap35,Vrk2,Lman1,Arhgap17,Pgrmc2,Arhgap26,Arhgap21,Plxnb1,Whamm,Arhgap12,Mospd2,Actn1,Tor1aip1,Ankfy1,Rhod,Capzb,Cav1,Diaph1,Lmnb1,Pak6,Akap12,Mcam,Pik3r1,Pik3r2,Plxna1,Rab7,Stbd1,Lemd3,Diaph2,Depdc1b,Vamp3,Dbn1,Diaph3,Esyt1,Racgap1,Arhgap39,Add3,Arhgap1
Signaling by ERBB4	1.83747	0.0420999	Psenen,Wwp1,Aph1b,Rps27a,Egfr,Ereg,Grb2,Wwox,Hbegf,Hras,Itch,Kras,Nedd4,Pik3ca,Pik3r1,Psen2,Shc1,Sos1,Src,Stat5a,Uba52,Ubb,Yap1,Ncstn,Aph1a
Platelet calcium homeostasis	1.83222	0.0421062	P2rx2,Atp2b1,Sri,Atp2a1,Atp2a2,Atp2b2,Calm1,Calm2,Calm3,Itpr1,Itpr2,Itpr3,P2rx1,P2rx7,P2rx6,Slc8a1,Atp2a3,Atp2b4,P2rx5
Downregulation of SMAD2/3:SMAD4 transcriptional activity	1.82611	0.0426677	Ube2d3,Smurf2,Snw1,Hdac1,Rps27a,Smad2,Smad3,Smad4,Ppm1a,Ube2d1,Skil,Ncor2,Tgif1,Uba52,Ubb,Usp9x,Trim33,Tgif2
Processing of Intronless Pre-mRNAs	1.81636	0.0428408	Clp1,Fip1l1,Cstf1,Ncbp2,Sympk,Nudt21,Cpsf7,Ncbp1,Wdr33,Pcf11,Cstf2,Cstf2t,Papola,Cpsf2,Cpsf4,Pabpn1,Cpsf3,Cpsf1,Cstf3
G-protein beta:gamma signalling	1.84243	0.0433249	Gng11,Pik3r6,Akt1,Akt2,Rhoa,Btk,Cdc42,Gnb1,Gnb2,Gnb4,Gnb5,Gng10,Gng2,Gng4,Gng5,Gngt2,Pdpk1,Plcb1,Plcb2,Plcb3,Akt3,Pik3r5,Pik3cg,Gng13
Death Receptor Signalling	1.66834	0.0433923	Arhgef39,Psenen,Tab1,Sppl2a,Arhgef37,Arhgef16,Bag4,Itgb3bp,Rtn4,Tab2,Plekhg2,Arhgef18,Arhgef10,Tradd,Arhgef3,Arhgef40,Rnf31,Otulin,Arhgef10l,Sppl2b,Sharpin,Cyld,Akap13,Arhgef17,Clip3,Adam17,Aph1b,Abr,Birc3,Birc2,Xiap,Rhoa,Bad,Bex3,Bcl2l11,Arhgef38,Casp2,Casp3,Casp8,Cflar,Rps27a,Ect2,Fadd,Fas,Gna13,Rack1,Prex1,Ikbkb,Ikbkg,Irak1,Itsn1,Arhgef2,Arhgef1,Arhgef15,Arhgef11,Arhgef19,Myd88,Nfkb1,Nfkbia,Ng…
Glycerophospholipid biosynthesis	1.67734	0.0436825	Pitpnm3,Lpcat4,Pla2g12a,Stard7,Crls1,Acp6,Tafazzin,Pnpla2,Plbd1,Cept1,Mboat2,Hadhb,Pnpla8,Agpat2,Slc44a1,Gpat3,Dgat2,Tmem86b,Agpat4,Pcyt2,Slc44a2,Pla2g4c,Gpat4,Cpne7,Agk,Cpne1,Slc44a4,Cpne3,Gpd1l,Ddhd2,Abhd4,Lpcat2,Osbpl8,Phospho1,Abhd3,Osbpl10,Cds1,Pla2g4f,Etnk1,Plb1,Liph,Miga2,Mfsd2a,Alpi,Mboat7,Cds2,Chkb,Chka,Pla2g4d,Csnk2a1,Csnk2a2,Csnk2b,Pcyt1a,Dgat1,Osbpl5,Lpin1,Lpcat1,Gpd1,Gpd2,Gnpat,Gpam,…
Integration of energy metabolism	1.79378	0.0436825	Gng11,Adipor2,Ffar1,Adipor1,Acsl3,Kcns3,Acaca,Prkaa2,Prkag2,Adipoq,Adcy6,Adra2a,Adra2c,Rap1a,Cacna1a,Cacna1c,Cacnb3,Cd36,Fasn,Gcg,Gna11,Gna14,Gnai1,Gnai2,Gnaq,Gnas,Gnb1,Gnb2,Gnb4,Gnb5,Gng10,Gng2,Gng4,Gng5,Gngt2,Itpr1,Itpr2,Itpr3,Marcks,Acsl4,Prkaca,Prkacb,Prkca,Plcb1,Plcb2,Plcb3,Prkar1a,Prkar1b,Prkar2b,Slc2a1,Slc2a2,Abcc8,Taldo1,Mlx,Tkt,Agpat1,Mlxipl,Rapgef3,Adcy5,Gng13
Fatty acyl-CoA biosynthesis	1.82126	0.0436825	Hacd4,Elovl5,Cbr4,Hacd2,Acly,Elovl6,Acsl5,Tecr,Acsl3,Morc2a,Elovl7,Acaca,Slc25a1,Acsl1,Fasn,H2-Ke6,Acsl4,Ppt1,Scd2,Elovl1,Ppt2,Hsd17b12,Hacd3,Acsf3,Hacd1
Processing of SMDT1	1.78928	0.0436825	Stoml2,Mcub,Pmpca,Maip1,Micu2,Smdt1,Afg3l2,Spg7,Pmpcb,Phb2,Phb,Mcu,Micu1,Parl,Yme1l1
Peroxisomal protein import	1.79802	0.0444614	Ube2d3,Lonp2,Nudt7,Pex12,Pex1,Tysnd1,Pex13,Acot8,Acot4,Pex26,Crot,Ehhadh,Gstk1,Acox1,Cat,Nudt19,Rps27a,Pex10,Pecr,Crat,Dao,Ephx2,Gnpat,Hmgcl,Acox3,Hsd17b4,Paox,Idh1,Phyh,Amacr,Mpv17,Nos2,Pex7,Ech1,Pipox,Pex5,Ube2d1,Scp2,Uba52,Ubb,Usp9x,Pex14,Ube2d2a,Mlycd,Eci2,Decr2,Slc27a2,Dhrs4,Pex6,Agps,Zfand6
TAK1 activates NFkB by phosphorylation and activation of IKKs complex	1.80798	0.0447846	Tab1,Ube2v1,Tab2,Nkiras1,Nkiras2,Nod1,Irak2,App,Rps27a,Hmgb1,Ikbkb,Ikbkg,Irak1,Nfkb1,Nfkb2,Nfkbia,Nfkbib,Rela,S100b,Traf6,Uba52,Ubb,Map3k7,Ube2n,Ripk2
Activation of BH3-only proteins	1.81023	0.0452951	Dynll2,Bmf,Bad,Bcl2,Bid,Bcl2l11,Ppp3cc,Ppp3r1,Ywhab,Ywhae,Ywhag,Ywhah,Ywhaq,Ywhaz,Sfn,Dynll1,Pmaip1,Mapk8
Orc1 removal from chromatin	1.76766	0.0452951	Psmd6,Psmd12,Psmd5,Psmc6,Psmd9,Cdt1,Psmd11,Psmd1,Psme4,Psmb11,Cdk2,Rps27a,Psmb9,Psmb8,Mcm3,Mcm2,Mcm4,Mcm5,Mcm6,Mcm7,Psmd7,Orc3,Orc1,Orc2,Psma2,Psma3,Psmb1,Psmb10,Psmb4,Psmb5,Psmb6,Psmb7,Psmc1,Psmc2,Psmc3,Psmc5,Psmd4,Psme1,Psme2,Psme3,Psmd10,Skp1,Psmd2,Psmd3,Uba52,Ubb,Rbx1,Cdc6,Psmc4,Psmd13,Psmd8,Psmd14,Orc4,Orc5,Psma1,Psma4,Psma5,Psma6,Psma7,Psmb2,Psmb3,Cul1,Skp2,Psmf1
HDMs demethylate histones	1.80427	0.0453402	Kdm4a,Riox2,Kdm1a,H4c17,H4c8,Arid5b,Kdm3a,Jmjd6,Kdm5b,Kdm7a,Kdm4c,Kdm4d,Kdm5a,Phf2,Kdm6b,Kdm5c,Kdm5d,Kdm1b,H3c2,H4c11,Phf8,Kdm2a,Kdm4b,Kdm2b,H4c14,H3c1
Signaling by NOTCH	1.77918	0.0457621	Psenen,Snw1,Ep300,Wwp2,Maml1,Maml3,Maml2,Dtx4,Adam10,Aph1b,Akt1,Rps27a,Dll1,Egfr,Elf3,Dtx1,Kat2a,Itch,Jag1,Jag2,Notch1,Notch4,Kat2b,Furin,Prkci,Psen2,Rbpj,Dll4,Uba52,Ubb,Ybx1,Ywhaz,Tmed2,Ncstn,Aph1a
DNA Damage Recognition in GG-NER	1.78347	0.0459728	Cul4a,Ino80,Tfpt,Ino80b,Nfrkb,Cul4b,Ddb2,Cops8,Actb,Parp2,Rps27a,Cops2,Ddb1,Mcrs1,Rad23a,Rad23b,Uba52,Ubb,Xpc,Yy1,Actr8,Rbx1,Actl6a,Ruvbl1,Cetn2,Cops3,Cops5,Cops4,Cops6,Cops7a,Cops7b,Ino80c,Ino80d
Cell death signalling via NRAGE, NRIF and NADE	1.76732	0.0494793	Arhgef39,Psenen,Arhgef37,Arhgef16,Itgb3bp,Plekhg2,Arhgef18,Arhgef10,Arhgef3,Arhgef40,Arhgef10l,Akap13,Arhgef17,Aph1b,Abr,Bad,Bex3,Bcl2l11,Arhgef38,Casp2,Casp3,Rps27a,Ect2,Gna13,Prex1,Itsn1,Arhgef2,Arhgef1,Arhgef15,Arhgef11,Arhgef19,Ngf,Ngfr,Sqstm1,Psen2,Rac1,Rasgrf2,Sos1,Sos2,Kalrn,Ngef,Arhgef7,Arhgef5,Traf6,Uba52,Ubb,Vav1,Vav2,Ywhae,Net1,Tiam2,Fgd2,Mapk8,Ncstn,Trio,Fgd4,Aph1a,Arhgef26
TP53 Regulates Transcription of Cell Cycle Genes	1.77077	0.0494793	Cnot6l,Cnot3,Cnot8,Cnot1,Cnot6,Cnot2,Ccnb1,E2f8,Bax,Btg2,Ccne1,Ccne2,Cdc25c,Cdk1,Cdk2,Cdkn1a,Cdkn1b,Gadd45a,Cnot10,Npm1,Pcna,Cnot7,E2f7,Cnot11,Plk2,Cnot4,Cenpj,Sfn,Cnot9,Tnks1bp1
Integrin signaling	1.74846	0.0498509	Rap1a,Akt1,Bcar1,Crk,Csk,Ptk2,Fn1,Grb2,Itga2b,Itgb3,Pdpk1,Rap1b,Ptpn1,Rasgrp2,Shc1,Sos1,Src,Syk,Apbb1ip,Tln1,Vwf,Rapgef3
Processing of Capped Intronless Pre-mRNA	1.77872	0.049985	Clp1,Fip1l1,Snrpd3,Cstf1,Snrpg,Ncbp2,Sympk,Nudt21,Snrpf,Lsm11,Cpsf7,Ncbp1,Wdr33,Pcf11,Cstf2,Cstf2t,Lsm10,Papola,Cpsf2,Slbp,Snrpb,Snrpe,Cpsf4,Pabpn1,Cpsf3,Cpsf1,Cstf3
Intra-Golgi traffic	1.76082	0.0502318	Snap29,Cog6,Cog4,Cog7,Cyth4,Cog5,Napg,Napa,Cog2,Trip11,Alpi,Arf1,Rgp1,Cog1,Napb,Nsf,Cyth1,Cyth2,Cyth3,Rab33b,Rab6a,Gosr1,Vti1a,Bet1l,Vps45,Stx5a,Ykt6,Gosr2,Stx6,Cog8,Stx16
Signaling by Hippo	1.75193	0.050669	Mob1a,Mob1b,Amotl1,Dvl2,Wwc1,Lats1,Lats2,Ywhab,Tjp1,Tjp2,Yap1,Ywhae,Amotl2,Amot,Nphp4,Wwtr1
Glucagon-type ligand receptors	1.75453	0.0508471	Gng11,Gcg,Ghrh,Gip,Gnas,Gnb1,Gnb2,Gnb4,Gnb5,Gng10,Gng2,Gng4,Gng5,Gngt2,Sct,Vipr1,Glp2r,Gng13
Ephrin signaling	1.72735	0.0527797	Ephb1,Efnb1,Efnb2,Efnb3,Ephb2,Ephb3,Ephb4,Fyn,Nck2,Rac1,Git1,Sdcbp,Src,Arhgef7,Pak2
Sphingolipid metabolism	1.7075	0.0541649	Sptssb,Acer3,Gba2,Acer2,Ormdl3,Ormdl2,Cers4,Samd8,Aldh3b1,Sumf2,Plpp3,Cert1,Prkd2,Degs2,Csnk1g2,Kdsr,Cers5,Sptssa,Sptlc1,Acer1,Sgpp2,Arsg,Sgms2,Glb1l,Prkd3,Osbp,Fa2h,Cers2,Aldh3a2,Neu4,Sgms1,Arsa,Asah1,Cers6,Glb1,Smpd4,Ppm1l,Degs1,Galc,B4galnt1,Gba,Gm2a,Hexa,Hexb,Sgpp1,Neu1,Plpp2,Neu3,Plpp1,Ctsa,Psap,Esyt2,Spns2,Sgpl1,Smpd1,Smpd2,Sptlc2,Asah2,Ugcg,Gltp,Sphk2,Esyt1,Sumf1,Smpd3,Cerk,Ormdl1,Vapa
Metabolism of nucleotides	1.66847	0.0549638	Ampd1,Ak5,Gmpr,Adprm,Cmpk1,Dpyd,Nt5c1a,Paics,Entpd4,Ppat,Nudt13,Uckl1,Ak8,Cad,Nt5c1b,Nt5m,Entpd8,Cda,Gmpr2,Pfas,Nudt9,Nt5c3,Atic,Nudt16,Adal,Ampd2,Nt5c2,Ada,Adk,Adsl,Adss,Ak1,Ak2,Ak4,Ampd3,Dut,Aprt,Entpd1,Entpd2,Entpd6,Entpd5,Dck,Ak6,Nme3,Gart,Gda,Gsr,Guk1,Uck2,Hprt,Itpa,Nudt18,Nudt15,Txnrd1,Nudt1,Nt5c,Nme1,Nme2,Entpd3,Pnp,Ctps,Rrm1,Rrm2,Nudt5,Tk1,Dtymk,Txn1,Tyms,Uck1,Umps,Upp1,Xdh,Rrm2b,Ctps2,Sa…
G-protein activation	1.72071	0.0549638	Gng11,Gna11,Gna14,Gnaq,Gnb1,Gnb2,Gnb4,Gnb5,Gng10,Gng2,Gng4,Gng5,Gngt2,Pomc,Gng13
Nucleotide-binding domain, leucine rich repeat containing receptor (NLR) signaling pathways	1.73489	0.0554198	Tab1,Ube2v1,Pycard,Sugt1,Tab2,Cyld,Nod1,Irak2,Birc3,Birc2,Bcl2,Bcl2l1,Casp1,Casp4,Casp2,Casp8,Casp9,Rps27a,Hsp90ab1,Ikbkb,Ikbkg,Irak1,Itch,P2rx7,Pstpip1,Nlrp3,Mefv,Tnfaip3,Traf6,Txn1,Uba52,Ubb,Aim2,Panx1,Txnip,Map2k6,Map3k7,Mapk13,Mapk14,Ube2n,Ripk2,Mapk12,Aamp,Nlrp1a
Regulation of PLK1 Activity at G2/M Transition	1.67082	0.0577573	Cep152,Haus6,Nde1,Haus3,Akap9,Ssna1,Ccp110,Dctn2,Cep192,Fbxw11,Tubg1,Csnk1d,Optn,Haus5,Ccnb1,Alms1,Ofd1,Haus7,Cep57,Cep72,Ckap5,Haus8,Clasp1,Sdccag8,Bora,Ccnb2,Cdk1,Rps27a,Dctn1,Sfi1,Dync1h1,Dync1i2,Mapre1,Hsp90aa1,Cep250,Rab8a,Cdk5rap2,Ppp1r12a,Nedd1,Nek2,Odf2,Pafah1b1,Pcm1,Pcnt,Prkaca,Plk1,Ppp2r1a,Ppp1cb,Prkar2b,Cep290,Dctn3,Plk4,Cep135,Actr1a,Skp1,Tuba1a,Tuba4a,Tubb5,Uba52,Ubb,Cenpj,Ywhae,Ywha…
Disassembly of the destruction complex and recruitment of AXIN to the membrane	1.70958	0.0587954	Amer1,Axin1,Ctnnb1,Cav1,Dvl1,Dvl2,Dvl3,Frat1,Fzd1,Fzd5,Frat2,Lrp5,Lrp6,Ppp2r1a,Ppp2ca,Ppp2cb,Gsk3b,Fzd2,Ppp2r5c,Ppp2r5e,Ppp2r5b,Ppp2r5a
Phosphorylation of the APC/C	1.71565	0.0614128	Anapc11,Anapc2,Cdc26,Ube2c,Anapc10,Cdc16,Ccnb1,Anapc15,Ube2s,Cdk1,Anapc1,Plk1,Anapc4,Ube2d1,Cdc23,Anapc16,Cdc27,Ube2e1,Anapc7,Anapc5
Retrograde transport at the Trans-Golgi-Network	1.69369	0.0615683	Usp6nl,Sys1,Plin3,Cog6,Vps53,Tmf1,Vps51,Cog4,Rab43,Cog7,Arl1,Cog5,Gcc1,Napg,Napa,Cog2,Arfrp1,Golga1,Arfip2,Rgp1,Igf2r,Vps54,Cog1,M6pr,Napb,Nsf,Rab6a,Vamp4,Vti1a,Golga4,Tgoln1,Vamp3,Rab9,Rab9b,Stx6,Vps52,Rabepk,Cog8,Stx16
RHOF GTPase cycle	1.70488	0.0617315	Vangl1,Baiap2l1,Steap3,Arhgap32,Basp1,Potegl,Arhgap21,Sowahc,Arhgap12,Baiap2l2,Actn1,Actb,Tor1aip1,Capzb,Cav1,Diaph1,Srgap2,Lmnb1,Akap12,Mcam,Pik3r1,Pik3r2,Rab7,Mtmr1,Snap23,Diaph2,Depdc1b,Vamp3,Diaph3,Rhof,Esyt1,Farp1,Arhgap39,Senp1,Add3,Potefam3a,Arhgap1
Signalling to ERKs	1.71956	0.0619928	Frs2,Mapkapk3,Rapgef1,Braf,Rap1a,Kidins220,Crk,Crkl,Grb2,Hras,Kras,Mapkapk2,Ngf,Ntrk1,Shc2,Ralgds,Shc1,Shc3,Sos1,Ywhab,Map2k1,Map2k2,Mapk1,Mapk14,Mapk3
Regulation of APC/C activators between G1/S and early anaphase	1.71645	0.0622071	Anapc11,Anapc2,Cdc26,Fbxo5,Ube2c,Anapc10,Cdc16,Ccnb1,Cdc20,Anapc15,Bub1b,Bub3,Ube2s,Cdk1,Cdk2,Anapc1,Plk1,Anapc4,Ube2d1,Cdc23,Anapc16,Cdc27,Ube2e1,Mad2l1,Anapc7,Fzr1,Anapc5
Transcriptional regulation by small RNAs	1.67496	0.0624461	Polr2e,Polr2l,Rae1,Nupl2,Polr2b,H4c17,Polr2g,H2aj,Polr2d,H4c8,Nup35,Nup37,Polr2f,Nup43,Polr2i,Tnrc6a,Nup107,Nup133,Nup93,Nupl1,Seh1l,Nup155,Nup54,Ago1,Ndc1,Nup98,Pom121,Ago2,Tpr,H2az2,Sec13,H3f3a,H3f3b,H2ac18,H2ax,Polr2h,Polr2k,Nup50,Nup62,Nup85,H2az1,Nup88,Ran,Ranbp2,Polr2a,Polr2c,Nup153,Nup210,H3c2,H4c11,H2ac10,H2bc11,H2bc3,H2bc21,Ipo8,Nup160,Aaas,Nup188,Nup214,H4c14,H3c1
Ovarian tumor domain proteases	1.71759	0.0624461	Rnf128,Tnip2,Otub2,Vcpip1,Vcp,Otud3,Otub1,Nod1,Rhoa,Cdk1,Rps27a,Ikbkg,Pten,Ube2d1,Ripk1,Tnfaip3,Traf3,Traf6,Trp53,Uba52,Ubb,Tnip1,Ripk2,Yod1,Zranb1
Metalloprotease DUBs	1.69245	0.0624461	Ep300,Babam1,H2aj,Stambp,Abraxas1,Babam2,Abraxas2,Stambpl1,Rps27a,Brcc3,H2ac18,Kat2b,Uimc1,Nlrp3,Stam,Uba52,Ubb,H2aw,H2ac10,Mysm1,Psmd14,H2ac21
Mitotic Anaphase	1.47997	0.0624461	Lbr,Cenpe,Ska2,Anapc11,Cenpp,Chmp4c,Anapc2,Psmd6,Cdc26,Spc25,Cenpm,Chmp3,Dsn1,Nuf2,Psmd12,Psmd5,Pmf1,Ndc80,Psmc6,Mis12,Psmd9,Nde1,Rcc1,Spc24,Itgb3bp,Cdca5,Pds5b,Tubb6,Zwilch,Dynll2,Sgo2a,Ube2c,Chmp2b,Chmp2a,Anapc10,Psmd11,B9d2,Nup35,Nup37,Nup43,Vrk2,Cdc16,Psmd1,Hdac8,Spdl1,Nup107,Psme4,Xpo1,Dync1li2,Nup133,Ankle2,Nup93,Dync1li1,Cenpu,Ist1,Ppp2r2a,Ccnb1,Seh1l,Cenpn,Sgo1,Nup155,Chmp7,Ndc1,Espl1,Nup…
Mitochondrial calcium ion transport	1.67129	0.0633984	Stoml2,Mcub,Pmpca,Maip1,Micu2,Smdt1,Afg3l2,Spg7,Slc8b1,Pmpcb,Phb2,Phb,Mcu,Micu1,Parl,Yme1l1
Formation of TC-NER Pre-Incision Complex	1.64132	0.0643372	Polr2e,Ep300,Gtf2h5,Polr2l,Cul4a,Ccnh,Zfp830,Xab2,Polr2b,Polr2g,Polr2d,Polr2f,Polr2i,Uvssa,Ercc8,Cul4b,Cops8,Aqr,Cdk7,Gtf2h3,Rps27a,Cops2,Ddb1,Ercc2,Ercc3,Gtf2h1,Hmgn1,Polr2h,Mnat1,Polr2k,Polr2a,Polr2c,Tcea1,Uba52,Ubb,Xpa,Ppie,Usp7,Rbx1,Gtf2h2,Ercc6,Isy1,Cops3,Cops5,Cops4,Cops6,Cops7a,Cops7b,Prpf19
Mitotic Metaphase and Anaphase	1.45878	0.0665636	Lbr,Cenpe,Ska2,Anapc11,Cenpp,Chmp4c,Anapc2,Psmd6,Cdc26,Spc25,Cenpm,Chmp3,Dsn1,Nuf2,Psmd12,Psmd5,Pmf1,Ndc80,Psmc6,Mis12,Fbxo5,Psmd9,Nde1,Rcc1,Spc24,Itgb3bp,Cdca5,Pds5b,Tubb6,Zwilch,Dynll2,Sgo2a,Ube2c,Chmp2b,Chmp2a,Anapc10,Psmd11,B9d2,Nup35,Nup37,Nup43,Vrk2,Cdc16,Psmd1,Hdac8,Spdl1,Nup107,Psme4,Xpo1,Dync1li2,Nup133,Ankle2,Nup93,Dync1li1,Cenpu,Ist1,Ppp2r2a,Ccnb1,Seh1l,Cenpn,Sgo1,Nup155,Chmp7,Ndc1,Esp…
TNFR2 non-canonical NF-kB pathway	1.62143	0.0665636	Psmd6,Psmd12,Psmd5,Psmc6,Tnfrsf14,Psmd9,Psmd11,Tnfsf13,Psmd1,Psme4,Fbxw11,Tnfrsf13c,Psmb11,Birc3,Birc2,Rps27a,Psmb9,Psmb8,Lta,Ltb,Ltbr,Psmd7,Nfkb2,Tnfsf14,Tnfrsf11b,Psma2,Psma3,Psmb1,Psmb10,Psmb4,Psmb5,Psmb6,Psmb7,Psmc1,Psmc2,Psmc3,Psmc5,Psmd4,Psme1,Psme2,Psme3,Tnfrsf25,Relb,Psmd10,Map3k14,Skp1,Psmd2,Tnfrsf11a,Tnfrsf17,Tnfrsf18,Tnfrsf1a,Tnfrsf1b,Tnfsf9,Traf2,Traf3,Psmd3,Tnfsf4,Uba52,Ubb,Ube2m,Uba…
Extension of Telomeres	-1.58083	0.0680861	Dna2,Nop10,Ppp6c,Gar1,Rpa3,Rpa1,Pot1a,Ctc1,Rfc3,Ten1,Pold4,Acd,Rfc5,Ankrd28,Rtel1,Rfc4,Stn1,Pif1,Blm,Cdk2,Dkc1,Lig1,Chtf18,Chtf8,Pcna,Pola1,Pola2,Pold1,Pold2,Ppp6r3,Rfc1,Rfc2,Nhp2,Wrap53,Terf1,Terf2,Wrn,Terf2ip
Processive synthesis on the C-strand of the telomere	-1.57665	0.0683681	Dna2,Rpa3,Rpa1,Pot1a,Pold4,Acd,Blm,Lig1,Pcna,Pold1,Pold2,Terf1,Terf2,Wrn,Terf2ip
Bile acid and bile salt metabolism	1.68114	0.0689718	Osbpl6,Osbpl9,Hsd3b7,Slc51b,Cyp27a1,Osbpl3,Stard5,Acot8,Slc51a,Osbp,Abcc3,Ch25h,Cyp7b1,Hsd17b4,Fabp6,Amacr,Ncoa1,Ncoa2,Ptgis,Rxra,Nr1h4,Scp2,Slc10a2,Cyp39a1,Slc27a2,Slc27a5,Osbpl1a,Osbpl2
Butyrate Response Factor 1 (BRF1) binds and destabilizes mRNA	1.67178	0.0689718	Exosc3,Exosc7,Exosc1,Exosc8,Dcp2,Dis3,Dcp1a,Exosc4,Akt1,Zfp36l1,Mapkapk2,Exosc9,Ywhab,Exosc5,Exosc2
Tristetraprolin (TTP, ZFP36) binds and destabilizes mRNA	1.66994	0.0689718	Exosc3,Exosc7,Exosc1,Exosc8,Dcp2,Dis3,Tnpo1,Dcp1a,Exosc4,Mapkapk2,Exosc9,Ywhab,Zfp36,Exosc5,Exosc2
TP53 Regulates Transcription of DNA Repair Genes	1.65243	0.0689718	Polr2e,Gtf2h5,Polr2l,Ccnh,Polr2b,Ctdp1,Elob,Polr2g,Eloc,Gtf2f2,Cdk12,Polr2d,Cdk13,Polr2f,Polr2i,Ccnt2,Cdk9,Ccnt1,Cdk7,Gtf2h3,Ell,Ercc2,Ercc3,Gtf2h1,Supt16,Polr2h,Mnat1,Polr2k,Polr2a,Polr2c,Ssrp1,Supt4a,Supt5,Tcea1,Gtf2h2,Nelfa,Nelfcd,Nelfb,Eloa,Nelfe,Gtf2f1
VxPx cargo-targeting to cilium	1.64553	0.0702997	Exoc2,Exoc8,Exoc1,Cngb1,Exoc5,Gbf1,Arf4,Asap1,Exoc3,Rab8a,Pkd2,Rab11fip3,Rab3ip,Exoc4,Exoc7,Rab11a
RHOU GTPase cycle	1.65927	0.0708245	Vangl1,Wwp2,Cltc,Rhou,Pak4,Dlg5,Cdc42,Arhgap31,Epha2,Srgap2,Grb2,Hgs,Peak1,Nck1,Nck2,Wdr6,Pik3r1,Pik3r2,Ptk2b,Git1,Txnl1,Sptbn1,Stam,Arhgef7,Depdc1b,Usp9x,Stam2,Pard6a,Git2,Pak2,Iqgap1,Arhgap30
Netrin-1 signaling	1.63601	0.071434	Dock1,Wasl,Cdc42,Ptk2,Fyn,Nck1,Ntn1,Rac1,Siah1a,Siah2,Src,Ezr,Ntn4,Mapk13,Mapk14,Mapk8,Trio,Mapk12
Signaling by EGFR	1.64751	0.0716584	Epgn,Areg,Cbl,Cdc42,Rps27a,Csk,Egfr,Epn1,Eps15,Eps15l1,Ereg,Gab1,Grb2,Hbegf,Hgs,Hras,Lrig1,Kras,Pik3ca,Pik3r1,Plcg1,Ptpn11,Ptpn12,Ptprk,Pxn,Sh3gl2,Sh3gl1,Sh3gl3,Shc1,Sos1,Src,Stam,Ptpn3,Arhgef7,Tgfa,Uba52,Ubb,Stam2,Spry1,Spry2,Sh3kbp1,Pag1,Aamp
Transmission across Chemical Synapses	1.53896	0.0718788	Ppfia2,Gng11,Gabrr3,Naaa,Slc38a2,Ppfia4,Ap2s1,Ppfia1,Adcy3,Adcy4,Ap2b1,Adcy1,Abat,Slc38a1,Slc17a7,Chrnb4,Lin7a,Camk2d,Camkk2,Tspoap1,Ppfia3,Chrna4,Chrna6,Chrnd,Adcy6,Adcy7,Adcy8,Adcy9,Aldh2,Ap2a1,Ap2a2,Ap2m1,Cacna1a,Cacnb3,Calm1,Calm2,Calm3,Camk2b,Camk2g,Cask,Comt,Dnajc5,Gabbr2,Slc1a7,Dlg1,Dlg4,Gnat3,Grip2,Gabra2,Gad2,Glul,Gls,Gnai1,Gnai2,Gnai3,Gnal,Gnb1,Gnb2,Gnb4,Gnb5,Gng10,Gng2,Gng4,Gng5,Gngt2,…
Metabolism of amino acids and derivatives	1.43996	0.0718788	Ethe1,Pycrl,Psmd6,Asrgl1,Lipt1,Acadsb,Mtap,Serinc2,Acad8,Psmd12,Psmd5,Psmc6,Gatm,Psmd9,Lipt2,Carnmt1,Hoga1,Slc44a1,Nmral1,Enoph1,Mri1,Psph,Gcsh,Pdhb,Pycr2,Psmd11,Slc6a8,Psmd1,Kyat1,Ndufab1,Iyd,Psme4,Kynu,Tat,Slc36a4,Dlat,Hykk,Amdhd1,Aldh6a1,Mccc1,Aspg,Adi1,Phgdh,Ahcy,Phykpl,Gcdh,Psmb11,Psat1,Mtr,Asmt,Haao,Cth,Agmat,Grhpr,Gpt,Aspa,Asl,Amd1,Arg1,Arg2,Ass1,Auh,Bcat1,Bcat2,Bckdhb,Bckdk,Qdpr,Bhmt,Acat…
Signaling by NOTCH3	1.63851	0.0725497	Psenen,Wwp2,Adam10,Aph1b,Rps27a,Dll1,Egfr,Jag1,Jag2,Psen2,Dll4,Uba52,Ubb,Ybx1,Ncstn,Aph1a
NOTCH3 Activation and Transmission of Signal to the Nucleus	1.63851	0.0725497	Psenen,Wwp2,Adam10,Aph1b,Rps27a,Dll1,Egfr,Jag1,Jag2,Psen2,Dll4,Uba52,Ubb,Ybx1,Ncstn,Aph1a
Arachidonic acid metabolism	1.65325	0.0732416	Cyp4a29,Pon2,Gpx4,Cyp2c66,Cyp2u1,Cyp4f18,Pon3,Cyp4f40,Cyp4a30b,Alox15,Alox5,Alox5ap,Cbr1,Cyp2j6,Cyp4b1,Dpep1,Ephx2,Faah,Ggt1,Gpx1,Gpx2,Lta4h,Ltc4s,Mapkapk2,Abcc1,Pla2g4a,Pon1,Ptgis,Ptgs1,Ptgs2,Tbxas1,Hpgds,Ptges3,Ggt5,Dpep2,Ptges2,Ptges
Negative regulation of MET activity	1.66028	0.0741689	Cbl,Rps27a,Eps15,Grb2,Hgf,Hgs,Lrig1,Usp8,Ptpn1,Ptpn2,Ptprj,Sh3gl2,Sh3gl1,Sh3gl3,Stam,Uba52,Ubb,Stam2,Sh3kbp1
Regulation of TP53 Degradation	1.65029	0.0743097	Rffl,Prr5,Akt1,Akt2,Atm,Ccng1,Cdk1,Cdk2,Rps27a,Daxx,Rictor,Rnf34,Mdm2,Mdm4,Chek2,Pdpk1,Ppp2r1a,Ppp2ca,Ppp2cb,Sgk1,Usp2,Trp53,Uba52,Ubb,Usp7,Akt3,Mlst8,Mtor,Ppp2r5c,Mapkap1,Phf20
Regulation of TP53 Expression and Degradation	1.65029	0.0743097	Rffl,Prr5,Akt1,Akt2,Atm,Ccng1,Cdk1,Cdk2,Rps27a,Daxx,Rictor,Rnf34,Mdm2,Mdm4,Chek2,Pdpk1,Ppp2r1a,Ppp2ca,Ppp2cb,Sgk1,Usp2,Trp53,Uba52,Ubb,Usp7,Akt3,Mlst8,Mtor,Ppp2r5c,Mapkap1,Phf20
TNFR1-induced NFkappaB signaling pathway	1.64209	0.0746485	Tab1,Tab2,Tradd,Rnf31,Sharpin,Cyld,Birc3,Birc2,Xiap,Rps27a,Rack1,Ikbkb,Ikbkg,Ripk1,Usp2,Tnfaip3,Tnfrsf1a,Traf1,Traf2,Uba52,Ubb,Usp4,Rbck1,Map3k7,Usp21
Base-Excision Repair, AP Site Formation	1.66886	0.0746485	H4c17,Pot1a,H2aj,H4c8,Neil3,Mutyh,Acd,Smug1,Mpg,Neil1,H2az2,H2ac18,H2ax,Mbd4,Nthl1,Ogg1,H2az1,Tdg,Terf1,Terf2,Ung,Neil2,H4c11,H2ac10,H2bc11,H2bc3,H2bc21,Terf2ip,H4c14
Platelet Aggregation (Plug Formation)	1.63546	0.0750312	Adra2a,Adra2c,Rap1a,Akt1,Col1a1,Col1a2,Bcar1,Crk,Csk,Ptk2,Fn1,Gp1bb,Grb2,Itga2b,Itgb3,Pdpk1,Rap1b,Ptpn1,Rasgrp2,Shc1,Sos1,Src,Syk,Apbb1ip,Tln1,Vwf,Rapgef3
MAPK targets/ Nuclear events mediated by MAP kinases	1.61618	0.0752258	Dusp6,Vrk3,Dusp7,Dusp3,Rps6ka5,Atf1,Atf2,Creb1,Fos,Jun,Mapkapk2,Ppp2r1a,Ppp2ca,Ppp2cb,Mapk7,Dusp4,Mapk1,Mapk10,Mapk14,Mapk3,Mapk8,Mapk9
p75 NTR receptor-mediated signalling	1.58646	0.07726	Arhgef39,Psenen,Arhgef37,Arhgef16,Itgb3bp,Rtn4,Plekhg2,Arhgef18,Arhgef10,Arhgef3,Arhgef40,Arhgef10l,Akap13,Arhgef17,Adam17,Aph1b,Abr,Rhoa,Bad,Bex3,Bcl2l11,Arhgef38,Casp2,Casp3,Rps27a,Ect2,Gna13,Prex1,Ikbkb,Irak1,Itsn1,Arhgef2,Arhgef1,Arhgef15,Arhgef11,Arhgef19,Myd88,Nfkb1,Nfkbia,Ngf,Ngfr,Omg,Sqstm1,Prkci,Psen2,Rac1,Rasgrf2,Rela,Sos1,Sos2,Kalrn,Ngef,Arhgef7,Arhgef5,Traf6,Uba52,Ubb,Vav1,Vav2,Ywhae,…
Formation of the cornified envelope	-1.5572	0.0780014	Lce1g,Krt20,Pkp2,Klk5,Lce1b,Lipn,Kazn,Krt80,Dsp,Krt7,Gm5414,Krt77,Dsc2,Dsg2,Cela2a,Evpl,Jup,Krt10,Krt13,Krt14,Krt15,Krt18,Krt19,Krt1,Krt86,Krt8,Pkp1,Ppl,Rptn,Pkp3,Krt23,Perp,Pkp4
Nuclear Pore Complex (NPC) Disassembly	-1.53688	0.0810514	Rae1,Nupl2,Nup35,Nup37,Nup43,Nup107,Nup133,Nup93,Nupl1,Ccnb1,Seh1l,Nup155,Nup54,Ndc1,Nup98,Pom121,Tpr,Sec13,Ccnb2,Cdk1,Nup50,Nup62,Nup85,Nup88,Ranbp2,Nup153,Nup210,Nup160,Aaas,Nup188,Nup214
activated TAK1 mediates p38 MAPK activation	1.61635	0.0826206	Tab1,Ube2v1,Tab2,Mapkapk3,Nod1,Irak2,Rps27a,Ikbkg,Irak1,Mapkapk2,Traf6,Uba52,Ubb,Map2k3,Map2k6,Map3k7,Mapk14,Ube2n,Ripk2
FOXO-mediated transcription	1.61703	0.0826206	Ep300,Foxo6,Akt1,Akt2,Atxn3,Smad2,Smad3,Smad4,Kat2b,Ywhab,Foxo4,Ywhag,Ywhaq,Ywhaz,Sfn,Foxo1,Foxo3,Akt3,Sirt1,Sirt3
Regulation of TNFR1 signaling	1.62213	0.0837055	Sppl2a,Tradd,Rnf31,Otulin,Sppl2b,Sharpin,Cyld,Clip3,Birc3,Birc2,Xiap,Casp8,Cflar,Rps27a,Fadd,Rack1,Ikbkb,Ikbkg,Tax1bp1,Ripk1,Usp2,Tnfaip3,Tnfrsf1a,Traf1,Traf2,Uba52,Ubb,Usp4,Rbck1,Usp21,Madd
Interconversion of nucleotide di- and triphosphates	1.60337	0.0846322	Ak5,Cmpk1,Nudt13,Ak8,Ak1,Ak2,Ak4,Dut,Ak6,Nme3,Gsr,Guk1,Txnrd1,Nme1,Nme2,Ctps,Rrm1,Rrm2,Dtymk,Txn1,Tyms,Rrm2b,Ctps2,Glrx
ADP signalling through P2Y purinoceptor 12	1.58911	0.0851673	Gng11,P2ry12,Gnat3,Gnai1,Gnai2,Gnai3,Gnb1,Gnb2,Gnb4,Gnb5,Gng10,Gng2,Gng4,Gng5,Gngt2,Gng13
G alpha (12/13) signalling events	1.56266	0.0853003	Gng11,Arhgef39,Arhgef37,Arhgef16,Plekhg2,Arhgef18,Arhgef10,Arhgef3,Plxnb1,Arhgef40,Arhgef10l,Akap13,Arhgef17,Abr,Rhoa,Rhob,Rhoc,Arhgef38,Btk,Ect2,Gna12,Gna13,Gnb1,Gnb2,Gnb4,Gnb5,Gng10,Gng2,Gng4,Gng5,Gngt2,Prex1,Itsn1,Arhgef2,Arhgef1,Arhgef15,Arhgef11,Arhgef19,Rasgrf2,Rock1,Rock2,Sos1,Sos2,Kalrn,Ngef,Arhgef7,Tbxa2r,Arhgef5,Vav1,Vav2,Net1,Tiam2,Fgd2,Trio,Fgd4,Gng13,Arhgef26
Rab regulation of trafficking	1.51205	0.0872517	Dennd4b,Rab3gap2,0610009B22Rik,Trappc2,Trappc5,Tbc1d15,Gapvd1,Trappc13,Trappc6a,Dennd1b,Map1lc3b,Dennd4c,Rab39b,Rab32,Ccz1,Tbc1d14,Rab13,Rab14,Tbc1d10b,Tbc1d17,Dennd6b,Dennd4a,Tbc1d13,Dennd1c,Tbc1d10a,Rab8b,Optn,Als2cl,Dennd2d,Rab38,Mon1a,Dennd3,Mon1b,Rab31,Als2,Rin2,Rab5a,Trappc8,Tbc1d10c,Rab1b,Trappc9,Tbc1d16,Denn2b,Akt1,Akt2,Arf6,Rab35,Rab27a,Sbf1,Chml,Trappc6b,Rgp1,Dennd2a,Tbc1d25,Gdi1,Gdi2,R…
Chemokine receptors bind chemokines	-1.51598	0.087613	Cxcl16,Cxcr3,Cxcr4,Ccr9,Ccr4,Ccr5,Ccr8,Ccr10,Ackr3,Cx3cr1,Cxcl1,Cxcr6,Ccl21a,Ccl12,Ccl22,Ccl25,Ccl27a,Ccl4,Ccl5,Cxcl5,Cx3cl1,Cxcl12,Ccrl2,Cxcl13,Pf4,Ccl19,Ccl28,Ppbp,Cxcr1
G beta:gamma signalling through PI3Kgamma	1.58905	0.0876836	Gng11,Pik3r6,Akt1,Akt2,Rhoa,Gnb1,Gnb2,Gnb4,Gnb5,Gng10,Gng2,Gng4,Gng5,Gngt2,Pdpk1,Akt3,Pik3r5,Pik3cg,Gng13
JNK (c-Jun kinases) phosphorylation and activation mediated by activated human TAK1	1.58826	0.0876836	Tab1,Ube2v1,Tab2,Nod1,Irak2,Rps27a,Ikbkg,Irak1,Traf6,Uba52,Ubb,Map2k4,Map2k7,Map3k7,Mapk10,Mapk8,Mapk9,Ube2n,Ripk2
CTLA4 inhibitory signaling	1.57336	0.0883093	Akt1,Akt2,Cd86,Fyn,Lck,Lyn,Ppp2r1a,Ppp2ca,Ppp2cb,Ptpn11,Src,Yes1,Akt3,Ppp2r5c,Ppp2r5e,Ppp2r5b,Ppp2r5a
Pyruvate metabolism	1.58068	0.0885465	Pdhb,Dlat,Pdk3,Glo1,Bsg,Dld,Hagh,Gstz1,Slc16a3,Ldha,Ldhb,Ldhc,Me1,Pdha1,Pdha2,Pdk2,Ppard,Rxra,Slc16a1,Pdp1,Pdp2,Vdac1,Pdpr,Pdhx,Pdk1
RND3 GTPase cycle	1.59028	0.0885465	Vangl1,Arhgap35,Picalm,Kctd13,Dlg5,Arhgap21,Scrib,Rnd3,Ccdc88a,Dsp,Fam83b,Cav1,Ckb,Cpd,Epha2,Flot2,Ktn1,Muc13,Tmod3,Wdr6,Pik3r1,Pik3r2,Ptpn13,Ckap4,Rbmx,Rock1,Lemd3,Txnl1,Tnfaip1,Depdc1b,Rasal2,Pkp4,Nisch
RNA Polymerase III Transcription Initiation From Type 3 Promoter	-1.51535	0.0894953	Polr2e,Polr2l,Brf2,Polr3k,Polr3d,Polr3g,Snapc5,Snapc2,Polr2f,Polr3gl,Polr3f,Polr3b,Polr3c,Snapc1,Snapc3,Crcp,Polr2h,Polr2k,Pou2f1,Polr1c,Bdp1,Tbp,Polr3a,Polr3e
Signaling by NOTCH1	1.57546	0.0900798	Snw1,Ep300,Maml1,Maml3,Maml2,Dtx4,Rps27a,Dtx1,Kat2a,Itch,Jag2,Notch1,Kat2b,Rbpj,Uba52,Ubb
Neurotransmitter receptors and postsynaptic signal transmission	1.52894	0.0922643	Gng11,Gabrr3,Ap2s1,Adcy3,Adcy4,Ap2b1,Adcy1,Chrnb4,Camk2d,Camkk2,Chrna4,Chrna6,Chrnd,Adcy6,Adcy7,Adcy8,Adcy9,Ap2a1,Ap2a2,Ap2m1,Calm1,Calm2,Calm3,Camk2b,Camk2g,Gabbr2,Dlg1,Dlg4,Gnat3,Grip2,Gabra2,Gnai1,Gnai2,Gnai3,Gnal,Gnb1,Gnb2,Gnb4,Gnb5,Gng10,Gng2,Gng4,Gng5,Gngt2,Grik3,Grik5,Grin2a,Grin2d,Kcnj10,Kcnj16,Kcnj2,Kcnj9,Nsf,Prkaca,Prkacb,Prkca,Plcb1,Plcb2,Plcb3,Prkar1a,Prkar1b,Prkar2b,Camk1,Ncald,Dlg3,…
S Phase	1.45981	0.0933136	Dna2,Anapc11,Anapc2,Psmd6,Cdc26,Ccnh,Pole4,Psmd12,Psmd5,Psmc6,Psmd9,Cdt1,Cdca5,Pds5b,Rpa3,Rpa1,Ube2c,Anapc10,Psmd11,Rfc3,Pold4,Cdc16,Psmd1,Psme4,Esco2,Rfc5,Rfc4,Psmb11,Anapc15,Gins2,Gins4,Akt1,Akt2,Esco1,Ube2s,Ccnd1,Ccne1,Ccne2,Cdc25a,Cdc25b,Cdk2,Cdk4,Cdk7,Cdkn1a,Cdkn1b,Rps27a,Smc3,Lig1,Psmb9,Psmb8,Mcm3,Mcm2,Mcm4,Mcm5,Mcm6,Mcm7,Anapc1,Mnat1,Psmd7,Orc3,Orc1,Orc2,Pcna,Pola1,Pola2,Pold1,Pold2,Pole,P…
G1/S Transition	1.50348	0.093964	Psmd6,Ccnh,Pole4,Psmd12,Psmd5,Psmc6,Psmd9,Cdt1,Rpa3,Rpa1,Psmd11,Mcm10,Psmd1,Akt1,Akt2,Ccnd1,Ccne1,Ccne2,Cdc25a,Cdc45,Cdc7,Cdk2,Cdk4,Cdk7,Cdkn1a,Cdkn1b,Rps27a,Psmb9,Psmb8,Mcm3,Mcm2,Mcm4,Mcm5,Mcm6,Mcm7,Mnat1,Psmd7,Orc3,Orc1,Orc2,Pola1,Pola2,Pole,Pole2,Ppp2r1a,Ppp2ca,Ppp2cb,Psma2,Psma3,Psmb1,Psmb10,Psmb4,Psmb5,Psmb6,Psmb7,Psmc1,Psmc2,Psmc3,Psmc5,Psmd4,Psme1,Psme2,Psme3,Rb1,Ptk6,Psmd10,Cks1b,Skp1,Psm…
Amino acids regulate mTORC1	1.52829	0.095284	Sh3bp4,Lamtor4,Atp6v1f,Atp6v1g2,Atp6v1g1,Atp6v1c1,Lamtor1,Szt2,Sesn2,Fnip2,Itfg2,Bmt2,Rraga,Lamtor5,Castor1,Slc38a9,Seh1l,Wdr24,Atp6v1d,Sesn1,Atp6v1h,Atp6v0e2,Atp6v1a,Atp6v1b2,Atp6v0d1,Atp6v1e1,Atp6v0e,Atp6v0c,Sec13,Castor2,Depdc5,Atp6v0b,Nprl3,Lamtor2,Rragd,Rheb,Fnip1,Flcn,Rragc,Nprl2,Mios,Lamtor3,Mlst8,Mtor,Wdr59,Tcirg1
Cellular response to starvation	1.52829	0.095284	Sh3bp4,Lamtor4,Atp6v1f,Atp6v1g2,Atp6v1g1,Atp6v1c1,Lamtor1,Szt2,Sesn2,Fnip2,Itfg2,Bmt2,Rraga,Lamtor5,Castor1,Slc38a9,Seh1l,Wdr24,Atp6v1d,Sesn1,Atp6v1h,Atp6v0e2,Atp6v1a,Atp6v1b2,Atp6v0d1,Atp6v1e1,Atp6v0e,Atp6v0c,Sec13,Castor2,Depdc5,Atp6v0b,Nprl3,Lamtor2,Rragd,Rheb,Fnip1,Flcn,Rragc,Nprl2,Mios,Lamtor3,Mlst8,Mtor,Wdr59,Tcirg1
Regulation of lipid metabolism by PPARalpha	1.55899	0.095896	Smarcd3,Chd9,Fabp1,Tbl1xr1,Ncoa1,Ncoa2,Tgs1,Ppara,Med1,Rxra,Sin3a,Sin3b,Ncor2,Tbl1x,Carm1,Helz2
Synthesis of IP3 and IP4 in the cytosol	1.54246	0.0978477	Itpkc,Plcg2,Pld4,Plcd3,Inpp5j,Plch1,Plch2,Plce1,Calm1,Calm2,Calm3,Inpp5b,Inpp5d,Plcb1,Plcb2,Plcb3,Plcb4,Plcd1,Plcg1,Pten,Itpk1,Itpkb,Ocrl,Itpka
Regulation of TP53 Activity through Methylation	1.53213	0.0988403	Ep300,Kmt5a,Ehmt2,Atm,Ehmt1,L3mbtl1,Rps27a,Mdm2,Mdm4,Chek2,Trp53,Uba52,Ubb,Ttc5,Jmy,Prmt5,Smyd2
Vasopressin regulates renal water homeostasis via Aquaporins	1.53915	0.0990405	Gng11,Aqp1,Aqp2,Aqp3,Aqp4,Gnas,Gnb1,Gnb2,Gnb4,Gnb5,Gng10,Gng2,Gng4,Gng5,Gngt2,Prkaca,Prkacb,Prkar1a,Prkar1b,Prkar2b,Rab11a,Gng13
Protein ubiquitination	1.50583	0.0998912	Ube2d3,Wdr61,Rnf181,Ube2w,Ube2g1,Ube2t,Uba6,Ube2r2,Rraga,Ube2c,Rnf40,Ube2v2,Pex12,Leo1,Shprh,Ube2z,Pex13,Otulin,Rnf144a,Rtf1,Ube2q2,Rnf20,Bcl10,Ube2s,Rps27a,Pex10,Cdc73,Uchl3,Pcna,Prkdc,Pex5,Ube2d1,Cdc34,Ube2k,Hltf,Paf1,Ctr9,Uba52,Ubb,Ube2e3,Ube2e1,Ube2l3,Uba1,Ube2a,Ube2b,Ube2g2,Ube2h,Usp5,Usp9x,Usp7,Pex14,Ube2d2a,H2bc11,H2bc3,H2bc21,Rnf152,Rad18,Ube2n,Wac
Syndecan interactions	1.55618	0.100384	Fgf2,Fn1,Sdc2,Itga2,Itga6,Itgav,Itgb1,Itgb3,Itgb5,Prkca,Sdc1,Sdc3,Sdc4,Tgfb1,Itgb4
Gene Silencing by RNA	1.50234	0.101203	Polr2e,Polr2l,Rae1,Nupl2,Polr2b,H4c17,Polr2g,H2aj,Polr2d,H4c8,Nup35,Nup37,Polr2f,Nup43,Polr2i,Tnrc6a,Nup107,Nup133,Nup93,Nupl1,Seh1l,Nup155,Nup54,Ago1,Ndc1,Nup98,Pom121,Ago2,Tpr,H2az2,Sec13,H3f3a,H3f3b,H2ac18,H2ax,Polr2h,Tnrc6b,Ago3,Polr2k,Nup50,Nup62,Nup85,H2az1,Nup88,Ran,Ranbp2,Polr2a,Polr2c,Tsnax,Tnrc6c,Tarbp2,Nup153,Nup210,Tsn,Prkra,H3c2,H4c11,H2ac10,H2bc11,H2bc3,H2bc21,Ipo8,Nup160,Aaas,Nup18…
Synthesis of PC	1.53017	0.102939	Stard7,Cept1,Slc44a1,Slc44a2,Slc44a4,Phospho1,Abhd3,Mfsd2a,Chkb,Chka,Csnk2a1,Csnk2a2,Csnk2b,Pcyt1a,Lpin1,Lpcat1,Chpt1,Slc44a3,Pemt,Stard10,Lpin2,Lpin3
CD209 (DC-SIGN) signaling	1.5476	0.103122	Ep300,Cd209a,Rps6ka5,Raf1,Fyn,Hras,Icam2,Kras,Lyn,Nfkb1,Prkaca,Prkacb,Rela,Relb,Pak2
G alpha (s) signalling events	-1.44443	0.103927	Gng11,Taar3,Rxfp2,Pde4d,Pde2a,Arrb1,Adm,Adora2a,Adora2b,Adrb1,Adrb2,Taar9,Grk2,Pde4c,Pde11a,Calca,Gcg,Ghrh,Gip,Gnas,Gnb1,Gnb2,Gnb4,Gnb5,Gng10,Gng2,Gng4,Gng5,Gngt2,Gpr27,Grk5,Gpr84,Hrh2,Rln3,Htr4,Iapp,Pth2,Mc2r,Mc3r,Pde1a,Pde1b,Pde3b,Pde4a,Pde7a,Pde8a,Pomc,Ramp1,Ptger2,Ptger4,Arrb2,Sct,Ramp2,Calcrl,Pde3a,Vipr1,Gpr25,Ramp3,Grk3,Grk6,Adm2,Gpr45,Glp2r,Pde7b,Gpbar1,Gng13
Separation of Sister Chromatids	1.39968	0.105022	Cenpe,Ska2,Anapc11,Cenpp,Anapc2,Psmd6,Cdc26,Spc25,Cenpm,Dsn1,Nuf2,Psmd12,Psmd5,Pmf1,Ndc80,Psmc6,Mis12,Psmd9,Nde1,Spc24,Itgb3bp,Cdca5,Pds5b,Tubb6,Zwilch,Dynll2,Sgo2a,Ube2c,Anapc10,Psmd11,B9d2,Nup37,Nup43,Cdc16,Psmd1,Hdac8,Spdl1,Nup107,Psme4,Xpo1,Dync1li2,Nup133,Dync1li1,Cenpu,Seh1l,Cenpn,Sgo1,Espl1,Nup98,Tubb2b,Kif2c,Psmb11,Tubal3,Cdc20,Cenpf,Anapc15,Ckap5,Rcc2,Clasp2,Clasp1,Birc5,Kntc1,Sec13,Bub1…
FCERI mediated Ca+2 mobilization	1.51542	0.105856	Plcg2,Btk,Calm1,Calm2,Calm3,Fcer1g,Grb2,Itk,Lat,Lcp2,Lyn,Grap2,Nfatc2,Plcg1,Ppp3ca,Ppp3cb,Ppp3r1,Shc1,Sos1,Syk,Tec,Vav1,Vav2
NRAGE signals death through JNK	1.51518	0.108549	Arhgef39,Arhgef37,Arhgef16,Plekhg2,Arhgef18,Arhgef10,Arhgef3,Arhgef40,Arhgef10l,Akap13,Arhgef17,Abr,Bad,Bcl2l11,Arhgef38,Ect2,Gna13,Prex1,Itsn1,Arhgef2,Arhgef1,Arhgef15,Arhgef11,Arhgef19,Rac1,Rasgrf2,Sos1,Sos2,Kalrn,Ngef,Arhgef7,Arhgef5,Vav1,Vav2,Net1,Tiam2,Fgd2,Mapk8,Trio,Fgd4,Arhgef26
Cell Cycle	1.26411	0.110375	Lbr,Dna2,Cdc14a,Cenpe,Ska2,Anapc11,Nop10,Cenpw,Cep152,Cenpp,Blzf1,Chmp4c,Anapc2,Psmd6,Tubgcp6,Cdc26,Spc25,Haus6,Cenpm,Mis18a,Golga2,Ccnh,Rae1,Chmp3,Dsn1,Nuf2,Pole4,Psmd12,Psmd5,Pmf1,Ndc80,Psmc6,Mis12,Fbxo5,Psmd9,Cdt1,Ctdnep1,Nupl2,Nde1,Haus3,Rcc1,H4c17,Spc24,Lin54,Itgb3bp,Cdca5,Ppp6c,Pds5b,Tubb6,Kmt5a,Zwilch,Dynll2,Gar1,Akap9,Rpa3,Babam1,Rpa1,Ncapd2,Pot1a,Ssna1,Sgo2a,H2aj,Ube2c,Ccp110,Numa1,Chmp2…
RUNX1 interacts with co-factors whose precise effect on RUNX1 targets is not known	1.53067	0.111402	Ep300,Smarcd3,Yaf2,Smarca2,Smarcc2,Pcgf5,Arid1b,Arid2,Bmi1,Cbfb,Cbx4,Phc3,Csnk2a1,Csnk2a2,Csnk2b,Phc1,Hipk2,Smarcd1,Smarcd2,Ring1,Rnf2,Smarca4,Smarcb1,Smarcc1,Phc2,Rybp,Actl6a,Smarce1,Arid1a,Scmh1,Cbx8
Regulation of Glucokinase by Glucokinase Regulatory Protein	-1.46051	0.112007	Rae1,Nupl2,Nup35,Nup37,Nup43,Nup107,Nup133,Nup93,Nupl1,Seh1l,Nup155,Nup54,Ndc1,Nup98,Pom121,Tpr,Sec13,Nup50,Nup62,Nup85,Nup88,Ranbp2,Nup153,Nup210,Nup160,Aaas,Nup188,Nup214
DAP12 interactions	1.49747	0.11266	Plcg2,Pik3cb,B2m,Btk,H2-Q6,Gm8909,Fyn,Siglecg,Grb2,H2-K1,H2-M3,H2-M9,H2-Q1,H2-Q10,H2-T23,H2-T24,Hras,Kras,Lat,Lck,Lcp2,Grap2,Pik3ca,Pik3r1,Pik3r2,Plcg1,Sirpa,Rac1,Shc1,Sos1,Syk,Gm5150,Tyrobp,Vav2,Gm11127,Gm9733
FGFR2 alternative splicing	1.49409	0.113266	Hnrnpf,Polr2e,Polr2l,Polr2b,Polr2g,Ncbp2,Gtf2f2,Polr2d,Polr2f,Polr2i,Ncbp1,Esrp1,Hnrnpm,Esrp2,Hnrnpa1,Polr2h,Polr2k,Polr2a,Polr2c,Tia1,Tial1,Hnrnph1,Rbfox2,Gtf2f1
RAB GEFs exchange GTP for GDP on RABs	1.4423	0.114051	Dennd4b,Rab3gap2,0610009B22Rik,Trappc2,Trappc5,Gapvd1,Trappc13,Trappc6a,Dennd1b,Dennd4c,Rab39b,Rab32,Ccz1,Rab13,Rab14,Dennd6b,Dennd4a,Dennd1c,Rab8b,Als2cl,Dennd2d,Rab38,Mon1a,Dennd3,Mon1b,Rab31,Als2,Rin2,Rab5a,Trappc8,Rab1b,Trappc9,Denn2b,Akt1,Akt2,Rab35,Rab27a,Sbf1,Chml,Trappc6b,Rgp1,Dennd2a,Gdi1,Gdi2,Rab27b,Dennd6a,Trappc1,Ankrd27,Rab8a,Rab1a,Rab10,Rab12,Rab18,Rab3a,Rab5b,Rab5c,Rab6a,Dennd5a,Ra…
Regulation of insulin secretion	1.46824	0.118442	Gng11,Ffar1,Acsl3,Kcns3,Adcy6,Adra2a,Adra2c,Rap1a,Cacna1a,Cacna1c,Cacnb3,Cd36,Gcg,Gna11,Gna14,Gnai1,Gnai2,Gnaq,Gnas,Gnb1,Gnb2,Gnb4,Gnb5,Gng10,Gng2,Gng4,Gng5,Gngt2,Itpr1,Itpr2,Itpr3,Marcks,Acsl4,Prkaca,Prkacb,Prkca,Plcb1,Plcb2,Plcb3,Slc2a1,Slc2a2,Abcc8,Rapgef3,Adcy5,Gng13
HSF1-dependent transactivation	1.48749	0.119484	Ep300,Akt1s1,Hsbp1,Camk2d,Camk2b,Camk2g,Cryab,Fkbp4,Hspb8,Hspa8,Hspa1l,Hsf1,Hspa2,Hsp90ab1,Hsp90aa1,Dnajb1,Ptges3,Mlst8,Mtor,Hspa1a
Phase I - Functionalization of compounds	1.44806	0.120234	Cyb5b,Cyp4a29,Mtarc2,Aadac,Bphl,Fdx2,Cyp26b1,Acss1,Cyp4v3,Cmbl,Cyp2c66,Cyp27a1,Cyp2u1,Cyp4f18,Cyp2c55,Aldh1b1,Aoc2,Cyp2s1,Cyp4f40,Cyp4a30b,Ces2h,Maob,Cyb5r3,Adh1,Adh7,Adh5,Cbr3,Ahr,Aip,Aldh1a1,Aldh2,Aoc3,Cyp11b1,Arnt,Cyp11a1,Cyp19a1,Cyp21a1,Cyp26a1,Cyp2j6,Cyp3a13,Cyp4b1,Cyp51,Cyp7b1,Ephx1,Fdx1,Fdxr,Fmo1,Hsp90ab1,Paox,Maoa,Ncoa1,Ncoa2,Nqo2,Pomc,Ptgis,Ptgs1,Rxra,Nr1h4,Cyp3a41a,Tbxas1,Cyp2w1,Fmo2,Cy…
Formation of Incision Complex in GG-NER	1.48145	0.123028	Pias3,Gtf2h5,Cul4a,Ccnh,Chd1l,Rpa3,Rpa1,Ube2v2,Cul4b,Sumo2,Ddb2,Parp2,Usp45,Cdk7,Gtf2h3,Rps27a,Ddb1,Ercc1,Ercc2,Ercc3,Gtf2h1,Mnat1,Ercc4,Rad23a,Rad23b,Sumo3,Uba52,Ubb,Ube2i,Sumo1,Xpa,Xpc,Rbx1,Pias1,Gtf2h2,Cetn2,Ube2n,Rnf111
Nucleotide Excision Repair	1.4183	0.128351	Pias3,Polr2e,Ep300,Gtf2h5,Polr2l,Cul4a,Ccnh,Pole4,Zfp830,Xab2,Polr2b,Polr2g,Chd1l,Ino80,Rpa3,Rpa1,Polr2d,Rfc3,Tfpt,Pold4,Polr2f,Polr2i,Ino80b,Ube2v2,Uvssa,Nfrkb,Ercc8,Rfc5,Cul4b,Sumo2,Rfc4,Ddb2,Cops8,Actb,Parp2,Aqr,Usp45,Cdk7,Gtf2h3,Rps27a,Cops2,Ddb1,Ercc1,Ercc2,Ercc3,Gtf2h1,Hmgn1,Polr2h,Lig1,Mnat1,Ercc4,Polr2k,Pcna,Pold1,Pold2,Pole,Pole2,Mcrs1,Rad23a,Rad23b,Rfc1,Rfc2,Polr2a,Polr2c,Sumo3,Tcea1,Ub…
Inositol phosphate metabolism	1.46249	0.129302	Itpkc,Ipmk,Nudt10,Inpp4b,Plcg2,Nudt4,Isyna1,Pld4,Plcd3,Inpp5j,Inpp4a,Plch1,Plch2,Plce1,Ippk,Ip6k2,Calm1,Calm2,Calm3,Inpp5a,Inpp5b,Inpp5d,Impa2,Minpp1,Plcb1,Plcb2,Plcb3,Plcb4,Plcd1,Plcg1,Pten,Itpk1,Nudt3,Itpkb,Ocrl,Ip6k1,Ppip5k2,Itpka,Ppip5k1
Immunoregulatory interactions between a Lymphoid and a non-Lymphoid cell	1.4187	0.129952	Ifitm3,Ifitm1,Siglecf,Jaml,Cd200r2,Cd300c2,Slamf7,B2m,H2-Q6,C3,Cd1d1,Cd22,Cd33,Cd34,Cd3e,Cd3g,Cd247,Cd81,Cd8a,Gm8909,Col3a1,Col1a1,Col1a2,Cxadr,Fcgr2b,Siglecg,H2-K1,H2-M3,H2-M9,H2-Q1,H2-Q10,H2-T23,H2-T24,Ifitm2,Icam1,Icam2,Itga4,Itgb1,Itgb2,Itgb7,Fcgr4,Siglece,Npdc1,Cd96,Nectin2,Pvr,Cd300lg,Lair1,Sftpd,Sh2d1a,Siglec1,Cd300a,Hcst,Pianp,Treml4,Gm11127,Slamf6
The phototransduction cascade	1.46341	0.130069	Cngb1,Ppef1,Camkmt,Metap1,Fntb,Calm1,Calm2,Calm3,Fnta,Gnb1,Gnb5,Guca1a,Gucy2e,Gucy2f,Nmt1,Nmt2,Pde6g,Rgs9,Sag,Metap2
Resolution of AP sites via the multiple-nucleotide patch replacement pathway	-1.43717	0.132191	Pole4,Adprs,Rpa3,Rpa1,Rfc3,Pold4,Rfc5,Rfc4,Parp2,Apex1,Lig1,Pcna,Polb,Pold1,Pold2,Pole,Pole2,Rfc1,Rfc2,Pole3
RHOV GTPase cycle	1.44988	0.132336	Vangl1,Cltc,Ccp110,Pak4,Dlg5,Wasl,Myo9a,Cep97,Arhgap12,Cdc42,Epha2,Peak1,Pak6,Nck1,Nck2,Wdr6,Pik3r1,Git1,Txnl1,Sptbn1,Arhgef7,Depdc1b,Usp9x,Pard6a,Pard6b,Sh3rf1,Tpm3,Map3k11,Git2,Pak2,Iqgap1,Tpm4,Rhov
EGFR downregulation	1.4528	0.132615	Epgn,Areg,Cbl,Cdc42,Rps27a,Egfr,Epn1,Eps15,Eps15l1,Ereg,Grb2,Hbegf,Hgs,Ptpn12,Ptprk,Sh3gl2,Sh3gl1,Sh3gl3,Stam,Ptpn3,Arhgef7,Tgfa,Uba52,Ubb,Stam2,Spry1,Spry2,Sh3kbp1
Regulation of signaling by CBL	1.44876	0.135039	Pik3cb,Rapgef1,Cbl,Rps27a,Crk,Crkl,Fyn,Grb2,Hck,Lyn,Pik3ca,Pik3cd,Pik3r1,Pik3r2,Pik3r3,Syk,Uba52,Ubb,Vav1,Yes1
RHO GTPases Activate Formins	1.38708	0.135551	Cenpe,Ska2,Cenpp,Spc25,Cenpm,Dsn1,Nuf2,Pmf1,Ndc80,Mis12,Nde1,Spc24,Itgb3bp,Tubb6,Zwilch,Dynll2,Sgo2a,B9d2,Nup37,Nup43,Spdl1,Nup107,Xpo1,Dync1li2,Nup133,Fmnl2,Dync1li1,Cenpu,Seh1l,Cenpn,Sgo1,Nup98,Tubb2b,Kif2c,Tubal3,Cdc20,Cenpf,Ckap5,Rcc2,Clasp2,Clasp1,Actb,Actg1,Birc5,Rhoa,Rhob,Rhoc,Rhod,Kntc1,Sec13,Bub1,Bub1b,Bub3,Daam1,Cdc42,Cenpa,Cenpc1,Diaph1,Dync1h1,Dync1i2,Dvl1,Dvl2,Dvl3,Mapre1,Evl,Srgap2,…
Regulation of FZD by ubiquitination	-1.41603	0.140023	Rspo3,Rspo2,Rnf43,Rps27a,Lgr5,Fzd4,Fzd5,Fzd6,Fzd8,Znrf3,Igfals,Lrp5,Lrp6,Usp8,Uba52,Ubb,Rspo1,Rspo4
PLC beta mediated events	1.43377	0.14081	Adcy3,Adcy4,Adcy1,Camkk2,Adcy6,Adcy7,Adcy8,Adcy9,Grk2,Calm1,Calm2,Calm3,Gna11,Gna14,Gnaq,Pde1a,Pde1b,Pde1c,Prkaca,Prkacb,Prkca,Prkcd,Pla2g4a,Plcb1,Plcb2,Plcb3,Plcb4,Prkar1a,Prkar1b,Prkar2b,Camkk1,Mapk1,Adcy5
Formation of the Early Elongation Complex	1.43729	0.14081	Polr2e,Gtf2h5,Polr2l,Ccnh,Polr2b,Ctdp1,Polr2g,Ncbp2,Gtf2f2,Polr2d,Polr2f,Polr2i,Ncbp1,Cdk7,Gtf2h3,Ercc2,Ercc3,Gtf2h1,Polr2h,Mnat1,Polr2k,Polr2a,Polr2c,Supt4a,Supt5,Gtf2h2,Nelfa,Nelfcd,Nelfb,Nelfe,Gtf2f1
G-protein mediated events	1.43485	0.141243	Adcy3,Adcy4,Adcy1,Camkk2,Adcy6,Adcy7,Adcy8,Adcy9,Grk2,Calm1,Calm2,Calm3,Gnat3,Gna11,Gna14,Gnai1,Gnai2,Gnai3,Gnal,Gnaq,Pde1a,Pde1b,Pde1c,Prkaca,Prkacb,Prkca,Prkcd,Pla2g4a,Plcb1,Plcb2,Plcb3,Plcb4,Prkar1a,Prkar1b,Prkar2b,Camkk1,Mapk1,Adcy5
Transport of bile salts and organic acids, metal ions and amine compounds	-1.38893	0.147915	Slc41a1,Slc47a1,Slc44a1,Slc44a2,Slc30a5,Slc6a20a,Rsc1a1,Slc5a11,Slc44a4,Slc39a4,Slc13a5,Slc39a3,Slc39a6,Slc6a19,Slc14a1,Slc22a7,Slc10a6,Slc2a13,Slc41a2,Bsg,Slc18a1,Slc22a15,Cp,Slc30a6,Emb,Slc13a4,Slc6a9,Slc39a7,Heph,Slc16a3,Slc13a3,Slc39a14,Slc44a3,Slc18a2,Slc11a1,Slc11a2,Slc22a6,Slc22a18,Slc22a8,Slc13a2,Slc16a1,Slc22a1,Slc22a2,Slc22a3,Slc31a1,Slc5a3,Slc40a1,Slc6a6,Slc30a1,Slc13a1,Rhbg,Slc30a10,S…
PKA-mediated phosphorylation of CREB	1.42422	0.147966	Adcy3,Adcy4,Adcy1,Adcy6,Adcy7,Adcy8,Adcy9,Calm1,Calm2,Calm3,Prkaca,Prkacb,Prkar1a,Prkar1b,Prkar2b,Adcy5
PKA activation	1.42422	0.147966	Adcy3,Adcy4,Adcy1,Adcy6,Adcy7,Adcy8,Adcy9,Calm1,Calm2,Calm3,Prkaca,Prkacb,Prkar1a,Prkar1b,Prkar2b,Adcy5
Downstream signal transduction	1.41155	0.148779	Pik3cb,Rapgef1,Bcar1,Crk,Crkl,Grb2,Grb7,Hras,Kras,Nck1,Nck2,Pdgfa,Pdgfb,Pdgfra,Pdgfrb,Pik3ca,Pik3r1,Pik3r2,Plcg1,Ptpn11,Sos1,Src,Stat3,Stat5a,Stat5b,Stat6,Rasa1
Presynaptic function of Kainate receptors	1.41817	0.148779	Gng11,Gnb1,Gnb2,Gnb4,Gnb5,Gng10,Gng2,Gng4,Gng5,Gngt2,Grik3,Plcb1,Plcb2,Plcb3,Gng13
Aquaporin-mediated transport	1.42173	0.14959	Gng11,Aqp11,Aqp1,Aqp2,Aqp3,Aqp4,Aqp5,Aqp7,Gnas,Gnb1,Gnb2,Gnb4,Gnb5,Gng10,Gng2,Gng4,Gng5,Gngt2,Prkaca,Prkacb,Prkar1a,Prkar1b,Prkar2b,Rab11a,Gng13
Cardiac conduction	1.36982	0.152132	Ahcyl1,Atp1a2,Asph,Npr2,Nppa,Atp2b1,Akap9,Atp1a3,Scn3b,Scn2b,Camk2d,Sri,Atp1a1,Atp1b1,Atp1b2,Atp1b3,Atp2a1,Atp2a2,Atp2b2,Cacna1c,Calm1,Calm2,Calm3,Camk2b,Camk2g,Scn2a,Dmpk,Fgf11,Kcnip2,Cacng7,Itpr1,Itpr2,Itpr3,Kcnd1,Kcnh2,Kcnj2,Kcnk1,Kcnk2,Kcnk5,Kcnq1,Fxyd3,Npr1,Prkaca,Kcnk6,Ryr1,Ryr3,Scn1a,Scn1b,Scn7a,Scn8a,Slc8a1,Atp2a3,Atp2b4,Stim1,Abcc9,Tnni3,Fxyd1,Kcnip3,Kcne3,Fxyd7,Rangrf
Lagging Strand Synthesis	-1.39759	0.153	Dna2,Rpa3,Rpa1,Rfc3,Pold4,Rfc5,Rfc4,Lig1,Pcna,Pola1,Pola2,Pold1,Pold2,Rfc1,Rfc2
RND2 GTPase cycle	1.39608	0.155748	Frs2,Vangl1,Plxnd1,Arhgap35,Kctd13,Dlg5,Scrib,Golga3,Uhrf1bp1l,Aldh3a2,Rnd2,Kidins220,Fam83b,Cav1,Epha2,Fnbp1,Ktn1,Muc13,Lrrc1,Wdr6,Nudc,Pik3r1,Pik3r2,Ptpn13,Ckap4,Rbmx,Lemd3,Txnl1,Kif14,Tnfaip1,Depdc1b,Tfrc,Pkp4,Arhgap1,Nisch
Polymerase switching on the C-strand of the telomere	-1.378	0.159706	Pot1a,Ctc1,Rfc3,Ten1,Pold4,Acd,Rfc5,Rfc4,Stn1,Chtf18,Chtf8,Pcna,Pola1,Pola2,Pold1,Pold2,Rfc1,Rfc2,Terf1,Terf2,Terf2ip
Amino acid transport across the plasma membrane	1.38249	0.160137	Slc38a2,Slc7a6,Slc6a20a,Slc36a4,Slc43a1,Slc16a10,Slc38a1,Slc6a19,Slc7a1,Slc3a2,Slc25a29,Slc7a8,Slc43a2,Slc36a1,Slc3a1,Slc7a5,Slc7a7,Slc6a6,Slc1a4,Slc7a11,Slc7a9
RNA Polymerase II Promoter Escape	1.38236	0.160137	Gtf2b,Polr2e,Taf12,Gtf2h5,Polr2l,Ccnh,Taf13,Polr2b,Polr2g,Gtf2e2,Gtf2f2,Taf11,Polr2d,Polr2f,Polr2i,Taf15,Gtf2a2,Taf4b,Taf1,Gtf2e1,Taf9,Cdk7,Gtf2h3,Taf3,Ercc2,Ercc3,Taf9b,Gtf2h1,Polr2h,Mnat1,Polr2k,Gtf2a1,Polr2a,Polr2c,Taf6,Tbp,Gtf2h2,Taf7,Taf10,Taf5,Taf4,Gtf2f1
RNA Polymerase II Transcription Pre-Initiation And Promoter Opening	1.38236	0.160137	Gtf2b,Polr2e,Taf12,Gtf2h5,Polr2l,Ccnh,Taf13,Polr2b,Polr2g,Gtf2e2,Gtf2f2,Taf11,Polr2d,Polr2f,Polr2i,Taf15,Gtf2a2,Taf4b,Taf1,Gtf2e1,Taf9,Cdk7,Gtf2h3,Taf3,Ercc2,Ercc3,Taf9b,Gtf2h1,Polr2h,Mnat1,Polr2k,Gtf2a1,Polr2a,Polr2c,Taf6,Tbp,Gtf2h2,Taf7,Taf10,Taf5,Taf4,Gtf2f1
RNA Polymerase II Transcription Initiation	1.38236	0.160137	Gtf2b,Polr2e,Taf12,Gtf2h5,Polr2l,Ccnh,Taf13,Polr2b,Polr2g,Gtf2e2,Gtf2f2,Taf11,Polr2d,Polr2f,Polr2i,Taf15,Gtf2a2,Taf4b,Taf1,Gtf2e1,Taf9,Cdk7,Gtf2h3,Taf3,Ercc2,Ercc3,Taf9b,Gtf2h1,Polr2h,Mnat1,Polr2k,Gtf2a1,Polr2a,Polr2c,Taf6,Tbp,Gtf2h2,Taf7,Taf10,Taf5,Taf4,Gtf2f1
RNA Polymerase II Transcription Initiation And Promoter Clearance	1.38236	0.160137	Gtf2b,Polr2e,Taf12,Gtf2h5,Polr2l,Ccnh,Taf13,Polr2b,Polr2g,Gtf2e2,Gtf2f2,Taf11,Polr2d,Polr2f,Polr2i,Taf15,Gtf2a2,Taf4b,Taf1,Gtf2e1,Taf9,Cdk7,Gtf2h3,Taf3,Ercc2,Ercc3,Taf9b,Gtf2h1,Polr2h,Mnat1,Polr2k,Gtf2a1,Polr2a,Polr2c,Taf6,Tbp,Gtf2h2,Taf7,Taf10,Taf5,Taf4,Gtf2f1
Acyl chain remodelling of PS	-1.3785	0.164175	Lpcat4,Pla2g12a,Osbpl8,Osbpl10,Pla2g4f,Pla2g4d,Osbpl5,Lpcat3,Pla2g4b,Pla2r1,Pla2g2a,Pla2g4a,Pla2g5,Pla1a,Mboat1,Pla2g10,Pla2g2f,Plaat3
Striated Muscle Contraction	1.38648	0.164838	Acta1,Actc1,Des,Dmd,Myh3,Myl1,Tmod4,Tmod3,Tnnc1,Tnni2,Tnni3,Tpm1,Tpm2,Vim,Tpm3,Tpm4
PI5P, PP2A and IER3 Regulate PI3K/AKT Signaling	1.33631	0.167486	Frs2,Irak4,Epgn,Strn,Pik3cb,Pip4k2b,Il33,Akt1,Areg,Cd86,Egfr,Erbb2,Ereg,Fgf15,Fgf2,Fgf7,Fgf9,Fgfr1,Fgfr2,Flt3l,Fyn,Gab1,Grb2,Hbegf,Hgf,Irak1,Il1rap,Insr,Irs1,Kit,Lck,Il1rl1,Kitl,Myd88,Pik3ap1,Pdgfa,Pdgfb,Pdgfra,Pdgfrb,Pik3ca,Pik3cd,Pik3r1,Pik3r2,Pik3r3,Pip5k1c,Pip4k2a,Pip5k1b,Pip5k1a,Pip4k2c,Ppp2r1a,Ppp2ca,Ppp2cb,Ptpn11,Rac1,Rac2,Src,Icos,Tgfa,Traf6,Vav1,Rhog,Irs2,Mapk1,Mapk3,Ppp2r5c,Ppp2r5e,Ppp2…
Metabolism of porphyrins	1.36189	0.171761	Ugt1a1,Ugt1a5,Slco2b1,Blvrb,Cox10,Blvra,Alas1,Abcc2,Cpox,Fabp1,Gsta3,Hmbs,Hmox1,Hmox2,Alad,Abcc1,Ppox,Urod,Uros,Abcg2,Cox15,Flvcr1
PCNA-Dependent Long Patch Base Excision Repair	-1.35344	0.183193	Pole4,Rpa3,Rpa1,Rfc3,Pold4,Rfc5,Rfc4,Apex1,Lig1,Pcna,Polb,Pold1,Pold2,Pole,Pole2,Rfc1,Rfc2,Pole3
Glucose metabolism	1.3178	0.183193	Aldob,Rae1,Nupl2,Slc25a11,Gnpda2,G6pc3,Nup35,Nup37,Nup43,Nup107,Pgm2l1,Nup133,Nup93,Nupl1,Seh1l,Adpgk,Nup155,Pfkfb3,Nup54,Ndc1,Nup98,Pfkfb4,Pck2,Pom121,Tpr,Aldoa,Aldoc,Sec13,Bpgm,Slc25a12,Slc25a1,Eno1,Eno2,Eno3,Fbp2,Fbp1,G6pc,G6pc2,Slc37a4,Gapdh,Got1,Got2,Gpi1,Hk1,Hk2,Hk3,Mdh2,Mdh1,Slc25a13,Nup50,Nup62,Pck1,Pfkfb2,Pfkl,Pfkm,Pgam1,Pgk1,Pkm,Nup85,Nup88,Ranbp2,Nup153,Nup210,Tpi1,Pgam2,Pfkp,Slc37a2,N…
TBC/RABGAPs	1.34855	0.187193	Tbc1d15,Map1lc3b,Tbc1d14,Tbc1d10b,Tbc1d17,Tbc1d13,Tbc1d10a,Rab8b,Optn,Tbc1d10c,Tbc1d16,Arf6,Rab35,Tbc1d25,Rab8a,Rab11b,Rab33a,Rab33b,Rab4a,Rab6a,Rab7,Rab11a,Tbc1d2,Ulk1,Gabarap,Tbc1d24,Gabarapl2,Rab7b,Rabgap1,Tsc1
Homology Directed Repair	-1.29767	0.188971	Dna2,Tipin,Pole4,H4c17,Rpa3,Babam1,Rpa1,Ppp4r2,Rfc3,H4c8,Pold4,Rnf168,Ube2v2,Abraxas1,Mus81,Topbp1,Atrip,Rfc5,Sumo2,Clspn,Rfc4,Rmi1,Nsd2,Babam2,Slx1b,Mdc1,Abl1,Parp2,Atm,Blm,Brca2,Polq,Cdk2,Chek1,Gen1,Rps27a,Brcc3,Herc2,H2ax,Polh,Hus1,Kat5,Mre11a,Sirt6,Pcna,Pold1,Pold2,Pole,Pole2,Rad1,Rad17,Rad51b,Rad51d,Rad9a,Rfc1,Rfc2,Slx4,Uimc1,Timeless,Top3a,Uba52,Ubb,Ube2i,Sumo1,Wrn,Xrcc1,Ppp4c,H4c11,H2bc11,…
DNA strand elongation	-1.34316	0.188971	Dna2,Rpa3,Rpa1,Rfc3,Pold4,Rfc5,Rfc4,Gins2,Gins4,Lig1,Pcna,Pola1,Pola2,Pold1,Pold2,Rfc1,Rfc2
RND1 GTPase cycle	1.33712	0.189758	Frs2,Vangl1,Rras2,Fam135a,Arhgap35,Dlg5,Epsti1,Ccdc88a,Dsp,Aldh3a2,Kidins220,Fam83b,Cav1,Cpd,Epha2,Flot2,Grb7,Muc13,Wdr6,Pik3r1,Pik3r2,Plxna1,Ptpn13,Rbmx,Lemd3,Stmn2,Txnl1,Kif14,Stip1,Depdc1b,Tfrc,Tmem59,Rasal2,Pkp4
Nucleotide salvage	1.3322	0.19629	Ampd1,Gmpr,Uckl1,Cda,Gmpr2,Adal,Ampd2,Ada,Adk,Ampd3,Aprt,Dck,Uck2,Hprt,Pnp,Tk1,Uck1,Upp1,Dguok
Signaling by SCF-KIT	1.31945	0.199472	Cbl,Chek1,Fer,Fes,Fyn,Grb10,Grb2,Grb7,Ptpn6,Hras,Jak2,Kit,Kras,Lck,Sh2b3,Lyn,Cma1,Kitl,Mmp9,Grap2,Pik3ca,Pik3r1,Pik3r2,Pik3r3,Prkca,Ptpn11,Rac1,Sos1,Src,Stat3,Stat5a,Stat5b,Tec,Vav1,Yes1,Sh2b2
Ca-dependent events	1.32826	0.199876	Adcy3,Adcy4,Adcy1,Camkk2,Adcy6,Adcy7,Adcy8,Adcy9,Grk2,Calm1,Calm2,Calm3,Pde1a,Pde1b,Pde1c,Prkaca,Prkacb,Prkca,Prkcd,Pla2g4a,Prkar1a,Prkar1b,Prkar2b,Camkk1,Mapk1,Adcy5
Signaling by Retinoic Acid	-1.32369	0.199876	Rdh10,Pdhb,Cyp26b1,Dlat,Rdh14,Pdk3,Aldh8a1,Rdh1,Rdh13,Adh1,Aldh1a1,Dhrs9,Cpt1a,Cpt1b,Sdr16c5,Cyp26a1,Dld,Fabp5,Rdh11,Pdha1,Pdha2,Pdk2,Ppard,Aldh1a2,Rara,Rarg,Dhrs3,Rxra,Rxrb,Rxrg,Rarb,Aldh1a3,Adh4,Pdhx,Dhrs4,Pdk1
PI Metabolism	1.28784	0.206093	Tnfaip8l1,Pi4k2b,Plekha8,Rab14,Plekha1,Tnfaip8l2,Fig4,Inpp4b,Vac14,Pik3r6,Mtmr12,Mtmr4,Inpp5j,Inpp4a,Tnfaip8,Mtmr3,Pik3cb,Rab5a,Pi4kb,Pip4k2b,Pik3r4,Plekha5,Plekha6,Pik3c2b,Mtmr2,Arf1,Arf3,Bmx,Sbf1,Mtmr9,Tnfaip8l3,Inpp5d,Mtm1,Plekha3,Plekha2,Sacm1l,Pnpla6,Pi4k2a,Pik3c2a,Pik3c2g,Pik3ca,Pik3cd,Pik3r1,Pik3r2,Pik3r3,Pikfyve,Pip5k1c,Pip4k2a,Pip5k1b,Pip5k1a,Pip4k2c,Inpp5k,Pten,Ptpn13,Rab4a,Rufy1,Mtmr1,…
Transport of inorganic cations/anions and amino acids/oligopeptides	1.28529	0.207388	Slc25a26,Slc38a2,Slc15a4,Slc25a22,Slc7a6,Slc9a9,Slc6a20a,Slc36a4,Slc17a5,Slc25a18,Slc26a11,Slc43a1,Slc8b1,Slc16a10,Slc9a3,Slc9a6,Slc38a1,Slc17a7,Slc26a6,Slc6a19,Ahcyl2,Slc24a4,Slc12a6,Sri,Slc9a8,Slc34a3,Slc7a1,Slc5a12,Calm1,Calm2,Calm3,Slc1a7,Slc26a3,Slc26a2,Slc9a5,Slc3a2,Ctns,Slc25a29,Slc7a8,Slc43a2,Slc36a1,Slc17a8,Slc5a8,Slc12a1,Slc12a2,Slc12a3,Slc12a7,Slc17a1,Slc1a1,Slc20a1,Slc20a2,Slc34a2,Slc…
RNA polymerase II transcribes snRNA genes	1.27967	0.210931	Ints3,Gtf2b,Polr2e,Polr2l,Taf13,Polr2b,Polr2g,Rpap2,Ncbp2,Gtf2e2,Ints1,Gtf2f2,Taf11,Snapc5,Ssu72,Ints4,Polr2d,Snapc2,Polr2f,Ints14,Nabp2,Polr2i,Ints2,Rprd1b,Ints10,Ints13,Gtf2a2,Ints12,Ints11,Ints8,Ccnt2,Ncbp1,Gtf2e1,Pcf11,Rprd2,Cdk9,Taf9,Snapc1,Nabp1,Ints5,Ints7,Snapc3,Ccnt1,Cdk7,Ell,Ints9,Polr2h,Polr2k,Gtf2a1,Ints6,Srrt,Pou2f1,Pou2f2,Polr2a,Polr2c,Sp1,Supt4a,Supt5,Taf6,Tbp,Ice1,Phax,Ice2,Rprd1a…
Nucleotide catabolism	1.31271	0.213708	Adprm,Dpyd,Nt5c1a,Entpd4,Nt5c1b,Nt5m,Entpd8,Nudt9,Nt5c3,Nudt16,Nt5c2,Entpd1,Entpd2,Entpd6,Entpd5,Gda,Itpa,Nudt18,Nudt15,Nudt1,Nt5c,Entpd3,Pnp,Nudt5,Upp1,Xdh,Samhd1,Nt5e,Entpd7
RNA Polymerase I Transcription Initiation	1.28843	0.216069	Gatad2b,Polr1h,Polr2e,Gtf2h5,Polr2l,Ccnh,Polr2f,Gatad2a,Hdac1,Rrn3,Chd4,Taf1d,Ehmt2,Cdk7,Gtf2h3,Ercc2,Ercc3,Gtf2h1,Hdac2,Rbbp7,Polr2h,Mbd3,Mnat1,Polr2k,Mta3,Rbbp4,Polr1c,Polr1b,Polr1a,Chd3,Taf1a,Taf1b,Taf1c,Tbp,Ttf1,Gtf2h2,Mta2,Ercc6,Polr1f,Polr1e
Effects of PIP2 hydrolysis	1.2994	0.218242	Abhd6,Daglb,Dgkz,Dagla,Abhd12,Dgkg,Dgkq,Dgka,Itpr1,Itpr2,Itpr3,Prkcd,Prkce,Dgkb,Mgll,Dgki,Dgkd
Adrenaline,noradrenaline inhibits insulin secretion	1.29924	0.218554	Gng11,Adcy6,Adra2a,Adra2c,Gnai1,Gnai2,Gnb1,Gnb2,Gnb4,Gnb5,Gng10,Gng2,Gng4,Gng5,Gngt2,Adcy5,Gng13
Interleukin-7 signaling	1.27831	0.230058	Il2rg,Il7r,Irs1,Jak3,Pik3r1,Pik3r2,Pik3r3,Smarca4,Stat3,Stat5a,Stat5b,H3c2,Irs2,Brwd1,H3c1
Negative regulation of the PI3K/AKT network	1.22884	0.25296	Phlpp1,Frs2,Irak4,Epgn,Strn,Pik3cb,Pip4k2b,Them4,Il33,Akt1,Akt2,Areg,Cd86,Egfr,Erbb2,Ereg,Fgf15,Fgf2,Fgf7,Fgf9,Fgfr1,Fgfr2,Flt3l,Fyn,Gab1,Grb2,Hbegf,Hgf,Phlpp2,Irak1,Il1rap,Insr,Irs1,Kit,Lck,Il1rl1,Kitl,Myd88,Pik3ap1,Pdgfa,Pdgfb,Pdgfra,Pdgfrb,Pik3ca,Pik3cd,Pik3r1,Pik3r2,Pik3r3,Pip5k1c,Pip4k2a,Pip5k1b,Pip5k1a,Pip4k2c,Ppp2r1a,Ppp2ca,Ppp2cb,Pten,Ptpn11,Rac1,Rac2,Src,Icos,Tgfa,Traf6,Vav1,Rhog,Akt3,Ir…
Phospholipid metabolism	1.20283	0.25504	Pitpnm3,Lpcat4,Pla2g12a,Stard7,Tnfaip8l1,Crls1,Acp6,Tafazzin,Pnpla2,Plbd1,Cept1,Pi4k2b,Mboat2,Hadhb,Pnpla8,Agpat2,Slc44a1,Gpat3,Dgat2,Plekha8,Tmem86b,Agpat4,Rab14,Pcyt2,Slc44a2,Plekha1,Pla2g4c,Gpat4,Cpne7,Tnfaip8l2,Agk,Cpne1,Slc44a4,Fig4,Cpne3,Inpp4b,Vac14,Gpd1l,Pik3r6,Ddhd2,Mtmr12,Mtmr4,Inpp5j,Inpp4a,Abhd4,Lpcat2,Osbpl8,Phospho1,Abhd3,Tnfaip8,Mtmr3,Osbpl10,Cds1,Pik3cb,Rab5a,Pi4kb,Pla2g4f,Pip4k2b…
Inactivation, recovery and regulation of the phototransduction cascade	1.24604	0.256264	Cngb1,Ppef1,Camkmt,Metap1,Fntb,Calm1,Calm2,Calm3,Fnta,Gnb5,Guca1a,Gucy2e,Gucy2f,Nmt1,Nmt2,Pde6g,Rgs9,Sag,Metap2
Nuclear Envelope Breakdown	-1.2478	0.256264	Rae1,Ctdnep1,Nupl2,Nup35,Nup37,Nup43,Nup107,Nup133,Nup93,Nupl1,Ccnb1,Seh1l,Nup155,Nup54,Ndc1,Nup98,Pom121,Tpr,Sec13,Ccnb2,Cdk1,Lpin1,Lmna,Lmnb1,Nup50,Nup62,Prkca,Plk1,Nup85,Nup88,Ranbp2,Lemd3,Nek9,Cnep1r1,Nup153,Nup210,Nup160,Aaas,Lemd2,Nup188,Nup214,Lpin2,Lpin3
Neuronal System	1.19644	0.257437	Ppfia2,Kcnb2,Gng11,Gabrr3,Kcng4,Naaa,Ppfibp1,Slc38a2,Ppfia4,Ap2s1,Lrfn3,Ppfia1,Lrfn2,Adcy3,Adcy4,Ap2b1,Adcy1,Abat,Slc38a1,Slc17a7,Epb41,Kcns3,Lrrtm2,Chrnb4,Lin7a,Camk2d,Grm5,Slitrk6,Camkk2,Tspoap1,Ppfia3,Chrna4,Chrna6,Chrnd,Adcy6,Adcy7,Adcy8,Adcy9,Aldh2,Ap2a1,Ap2a2,Ap2m1,Cacna1a,Cacnb3,Calm1,Calm2,Calm3,Camk2b,Camk2g,Cask,Comt,Dnajc5,Panx2,Gabbr2,Dbnl,Slc1a7,Dlg1,Dlg4,Gnat3,Epb41l2,Epb41l3,Grip2,…
HDR through Homologous Recombination (HRR) or Single Strand Annealing (SSA)	-1.23436	0.257437	Dna2,Tipin,Pole4,H4c17,Rpa3,Babam1,Rpa1,Ppp4r2,Rfc3,H4c8,Pold4,Rnf168,Ube2v2,Abraxas1,Mus81,Topbp1,Atrip,Rfc5,Sumo2,Clspn,Rfc4,Rmi1,Nsd2,Babam2,Slx1b,Mdc1,Abl1,Atm,Blm,Brca2,Cdk2,Chek1,Gen1,Rps27a,Brcc3,Herc2,H2ax,Polh,Hus1,Kat5,Mre11a,Sirt6,Pcna,Pold1,Pold2,Pole,Pole2,Rad1,Rad17,Rad51b,Rad51d,Rad9a,Rfc1,Rfc2,Slx4,Uimc1,Timeless,Top3a,Uba52,Ubb,Ube2i,Sumo1,Wrn,Ppp4c,H4c11,H2bc11,H2bc3,H2bc21,Rnf8…
Downstream signaling of activated FGFR2	1.24566	0.257856	Frs2,Fgf2,Fgf7,Fgf9,Fgfr2,Gab1,Grb2,Hras,Kras,Pik3ca,Pik3r1,Plcg1,Ptpn11,Shc1,Sos1
Activation of G protein gated Potassium channels	1.24113	0.262485	Gng11,Gabbr2,Gnb1,Gnb2,Gnb4,Gnb5,Gng10,Gng2,Gng4,Gng5,Gngt2,Kcnj10,Kcnj16,Kcnj2,Kcnj9,Gabbr1,Gng13
G protein gated Potassium channels	1.24113	0.262485	Gng11,Gabbr2,Gnb1,Gnb2,Gnb4,Gnb5,Gng10,Gng2,Gng4,Gng5,Gngt2,Kcnj10,Kcnj16,Kcnj2,Kcnj9,Gabbr1,Gng13
Inhibition of voltage gated Ca2+ channels via Gbeta/gamma subunits	1.24113	0.262485	Gng11,Gabbr2,Gnb1,Gnb2,Gnb4,Gnb5,Gng10,Gng2,Gng4,Gng5,Gngt2,Kcnj10,Kcnj16,Kcnj2,Kcnj9,Gabbr1,Gng13
GPVI-mediated activation cascade	1.23651	0.265637	Plcg2,Pik3r6,Mpig6b,Pik3cb,Rhoa,Rhob,Cdc42,Col1a1,Col1a2,Fcer1g,Fyn,Pdpn,Ptpn6,Lat,Lck,Lcp2,Lyn,Pdpk1,Pik3ca,Pik3r1,Pik3r2,Pik3r3,Ptpn11,Rac1,Rac2,Syk,Vav1,Vav2,Rhog,Pik3r5,Pik3cg
IKK complex recruitment mediated by RIP1	1.23152	0.267974	Ube2d3,Ube2v1,Ticam1,Birc3,Birc2,Cd14,Rps27a,Ikbkb,Ikbkg,Ly96,Ube2d1,Ripk1,Tlr4,Traf6,Uba52,Ubb,Ripk3,Ube2d2a,Ube2n
Synthesis of DNA	1.19198	0.270128	Dna2,Anapc11,Anapc2,Psmd6,Cdc26,Pole4,Psmd12,Psmd5,Psmc6,Psmd9,Cdt1,Rpa3,Rpa1,Ube2c,Anapc10,Psmd11,Rfc3,Pold4,Cdc16,Psmd1,Psme4,Rfc5,Rfc4,Psmb11,Anapc15,Gins2,Gins4,Ube2s,Ccne1,Ccne2,Cdk2,Rps27a,Lig1,Psmb9,Psmb8,Mcm3,Mcm2,Mcm4,Mcm5,Mcm6,Mcm7,Anapc1,Psmd7,Orc3,Orc1,Orc2,Pcna,Pola1,Pola2,Pold1,Pold2,Pole,Pole2,Psma2,Psma3,Psmb1,Psmb10,Psmb4,Psmb5,Psmb6,Psmb7,Psmc1,Psmc2,Psmc3,Psmc5,Psmd4,Psme1,Psme…
SUMOylation of ubiquitinylation proteins	-1.23763	0.273717	Rae1,Nupl2,Nup35,Nup37,Nup43,Nup107,Nup133,Nup93,Nupl1,Seh1l,Nup155,Nup54,Ndc1,Nup98,Pom121,Tpr,Sec13,Mdm2,Pias2,Nup50,Nup62,Pml,Nup85,Nup88,Ranbp2,Trim27,Nup153,Nup210,Ube2i,Sumo1,Vhl,Pias1,Pias4,Nup160,Aaas,Nup188,Nup214
Interleukin receptor SHC signaling	1.20875	0.28672	Pik3cb,Csf2ra,Grb2,Ptpn6,Il2rb,Il2rg,Inpp5d,Jak2,Jak3,Pik3ca,Pik3cd,Pik3r1,Pik3r2,Pik3r3,Shc1,Sos1
SUMOylation of SUMOylation proteins	-1.2233	0.288039	Rae1,Nupl2,Nup35,Nup37,Nup43,Nup107,Nup133,Nup93,Nupl1,Seh1l,Nup155,Nup54,Sumo2,Ndc1,Topors,Nup98,Pom121,Tpr,Sec13,Nup50,Nup62,Nup85,Nup88,Ranbp2,Nup153,Nup210,Ube2i,Sumo1,Pias4,Nup160,Aaas,Nup188,Nup214
E3 ubiquitin ligases ubiquitinate target proteins	1.20112	0.291479	Ube2d3,Wdr61,Rnf181,Rraga,Rnf40,Ube2v2,Pex12,Leo1,Shprh,Pex13,Rnf144a,Rtf1,Rnf20,Bcl10,Rps27a,Pex10,Cdc73,Pcna,Prkdc,Pex5,Ube2d1,Hltf,Paf1,Ctr9,Uba52,Ubb,Ube2e1,Ube2l3,Ube2a,Ube2b,Pex14,Ube2d2a,H2bc11,H2bc3,H2bc21,Rnf152,Rad18,Ube2n,Wac
Metabolism of steroid hormones	-1.2145	0.292469	Fdx2,Stard4,Stard6,Stard3nl,Tspoap1,Akr1b3,Cyp11b1,Akr1b7,Tspo,Cyp11a1,Cyp17a1,Cyp19a1,Cyp21a1,Srd5a1,Fdx1,Fdxr,Akr1b8,Hsd11b1,Hsd11b2,Hsd17b2,Hsd17b11,Pomc,Star,Hsd17b12,Srd5a3,Stard3
Costimulation by the CD28 family	1.19479	0.292478	Tnfrsf14,Them4,Prr5,Btla,Akt1,Akt2,Cd3e,Cd3g,Cd247,Cd86,Cdc42,Csk,Rictor,Fyn,Grb2,Ptpn6,Lck,Lyn,Grap2,Icosl,Pdcd1,Pdpk1,Pik3ca,Pik3r1,Pik3r2,Pik3r3,Ppp2r1a,Ppp2ca,Ppp2cb,Ptpn11,Rac1,Src,Map3k14,Icos,Vav1,Yes1,Akt3,Mlst8,Mtor,Pdcd1lg2,Map3k8,Ppp2r5c,Ppp2r5e,Pak2,Cd274,Ppp2r5b,Ppp2r5a,Mapkap1,Trib3
Glycogen metabolism	1.20172	0.293961	Pgm2,Phkg2,Phkb,Pgm2l1,Pgm1,Gbe1,Pygl,Phka2,Agl,Calm1,Calm2,Calm3,Gaa,Gys1,Phka1,Pygm,Ugp2,Ppp1r3c,Gyg
Activation of Matrix Metalloproteinases	-1.20527	0.302782	Ctrb1,Spock3,Mmp25,Col18a1,Ctsk,Klk1b26,Cma1,Mmp11,Mmp13,Mmp14,Mmp15,Mmp16,Mmp2,Mmp3,Mmp8,Mmp9,Furin,Mmp17
Activation of NMDA receptors and postsynaptic events	1.18961	0.309163	Camk2d,Camkk2,Calm1,Calm2,Calm3,Camk2b,Camk2g,Dlg1,Dlg4,Grin2a,Grin2d,Prkaca,Prkacb,Prkar1a,Prkar1b,Prkar2b,Camk1,Dlg3,Camkk1
G2/M DNA damage checkpoint	1.16524	0.312169	Dna2,H4c17,Rpa3,Babam1,Rpa1,Rfc3,H4c8,Rnf168,Ube2v2,Abraxas1,Topbp1,Atrip,Ccnb1,Rfc5,Rfc4,Rmi1,Nsd2,Babam2,Mdc1,Atm,Blm,Cdc25c,Cdk1,Chek1,Brcc3,Herc2,H2ax,Hus1,Kat5,Mre11a,Chek2,Rad1,Rad17,Rad9a,Rfc2,Uimc1,Ywhab,Top3a,Trp53,Sumo1,Wrn,Ywhae,Ywhag,Ywhah,Ywhaq,Ywhaz,Sfn,H4c11,H2bc11,H2bc3,H2bc21,Rnf8,Pias4,Exo1,Trp53bp1,Nbn,Rmi2,Ube2n,Rbbp8,H4c14
Global Genome Nucleotide Excision Repair (GG-NER)	1.16432	0.316818	Pias3,Gtf2h5,Cul4a,Ccnh,Pole4,Chd1l,Ino80,Rpa3,Rpa1,Rfc3,Tfpt,Pold4,Ino80b,Ube2v2,Nfrkb,Rfc5,Cul4b,Sumo2,Rfc4,Ddb2,Cops8,Actb,Parp2,Usp45,Cdk7,Gtf2h3,Rps27a,Cops2,Ddb1,Ercc1,Ercc2,Ercc3,Gtf2h1,Mnat1,Ercc4,Pcna,Pold1,Pold2,Pole,Pole2,Mcrs1,Rad23a,Rad23b,Rfc1,Rfc2,Sumo3,Uba52,Ubb,Ube2i,Sumo1,Xpa,Xpc,Yy1,Actr8,Rbx1,Actl6a,Pias1,Ruvbl1,Gtf2h2,Pole3,Cetn2,Cops3,Cops5,Cops4,Cops6,Cops7a,Cops7b,Polk,Ube…
EPH-ephrin mediated repulsion of cells	1.16731	0.319549	Psenen,Ephb1,Aph1b,Efna1,Efna4,Efnb1,Efnb2,Efnb3,Epha1,Epha2,Epha4,Ephb2,Ephb3,Ephb4,Fyn,Lyn,Mmp2,Mmp9,Psen2,Rac1,Src,Vav2,Yes1,Ncstn,Aph1a
Synthesis of Leukotrienes (LT) and Eoxins (EX)	1.16253	0.323103	Cyp4a29,Cyp4f18,Cyp4f40,Cyp4a30b,Alox15,Alox5,Alox5ap,Cyp4b1,Dpep1,Ggt1,Lta4h,Ltc4s,Mapkapk2,Abcc1,Ggt5,Dpep2
Telomere Maintenance	1.16227	0.323685	Dna2,Nop10,H4c17,Ppp6c,Gar1,Rpa3,Rpa1,Pot1a,H2aj,Ctc1,Rfc3,H4c8,Ten1,Pold4,Acd,Rfc5,Ankrd28,Rtel1,Rfc4,Stn1,Pif1,H2az2,Blm,Cdk2,Daxx,H2ac18,H2ax,Dkc1,Lig1,Chtf18,Chtf8,Pcna,Pola1,Pola2,Pold1,Pold2,H2az1,Ppp6r3,Rfc1,Rfc2,Nhp2,Wrap53,Terf1,Terf2,Wrn,Atrx,H4c11,H2ac10,H2bc11,H2bc3,H2bc21,Terf2ip,H4c14
Class B/2 (Secretin family receptors)	1.16713	0.324756	Gng11,Adm,Calca,Adgre1,Gcg,Ghrh,Gip,Gnas,Gnb1,Gnb2,Gnb4,Gnb5,Gng10,Gng2,Gng4,Gng5,Gngt2,Iapp,Pth2,Ramp1,Sct,Ramp2,Calcrl,Ucn,Vipr1,Ramp3,Adgre5,Adm2,Glp2r,Gng13
Nuclear Envelope (NE) Reassembly	1.1547	0.328591	Lbr,Chmp4c,Chmp3,Rcc1,Tubb6,Chmp2b,Chmp2a,Nup35,Nup37,Nup43,Vrk2,Nup107,Nup133,Ankle2,Nup93,Ist1,Ppp2r2a,Ccnb1,Seh1l,Nup155,Chmp7,Ndc1,Nup98,Tubb2b,Tubal3,Pom121,Chmp4b,Chmp6,Sec13,Ccnb2,Cdk1,Kpnb1,Spast,Vps4a,Nup85,Ppp2r1a,Ppp2ca,Ran,Rangap1,Tuba1a,Tuba1b,Tuba4a,Tubb3,Ube2i,Sumo1,Vrk1,Cc2d1b,Nup160,Lemd2,Ahctf1,Tubb4b,Nup188,Sirt2
G2/M Checkpoints	1.1443	0.330211	Dna2,Psmd6,Psmd12,Psmd5,Psmc6,Psmd9,H4c17,Rpa3,Babam1,Rpa1,Psmd11,Rfc3,H4c8,Mcm10,Rnf168,Psmd1,Ube2v2,Abraxas1,Psme4,Topbp1,Atrip,Ccnb1,Rfc5,Pkmyt1,Clspn,Rfc4,Psmb11,Rmi1,Nsd2,Babam2,Mdc1,Atm,Blm,Ccnb2,Cdc25a,Cdc25c,Cdk1,Cdc45,Cdc7,Cdk2,Chek1,Rps27a,Brcc3,Herc2,H2ax,Hus1,Kat5,Psmb9,Psmb8,Mcm3,Mcm2,Mcm4,Mcm5,Mcm6,Mcm7,Psmd7,Mre11a,Orc3,Chek2,Orc1,Orc2,Psma2,Psma3,Psmb1,Psmb10,Psmb4,Psmb5,Psmb6,Psm…
Translesion Synthesis by POLH	1.16347	0.331373	Rchy1,Rpa3,Rpa1,Rfc3,Rfc5,Vcp,Rfc4,Rps27a,Sprtn,Polh,Pcna,Rfc1,Rfc2,Nploc4,Uba52,Ubb,Ufd1
SUMOylation	1.13993	0.33188	Pias3,Eid3,Ep300,Nsmce3,Rae1,Ddx17,Nupl2,Smc6,H4c17,Nsmce1,Nsmce4a,Rpa1,Nsmce2,Ing2,H4c8,Nup35,Nup37,Nup43,Rnf168,Nup107,Nup133,Nup93,Nupl1,Seh1l,Nrip1,Nup155,Zfp131,Nup54,Sumo2,Ndc1,Topors,Hdac1,Nup98,Pom121,Senp2,Tpr,Mdc1,Uhrf2,Birc5,Sec13,Hdac4,Blm,Bmi1,Brca1,Cbx4,Phc3,Smc3,Ctbp1,Daxx,Dnmt1,Phc1,Hdac2,Herc2,Hic1,Hipk2,Hnrnpc,Hnrnpk,Satb2,Ikbkg,Incenp,Mbd1,Mdm2,Pias2,Ncoa1,Nfkb2,Nfkbia,Nup50,Np…
Cellular response to heat stress	1.14588	0.332068	Ep300,Rps19bp1,Rae1,Nupl2,Bag4,Akt1s1,Hikeshi,Hsbp1,Rpa3,Rpa1,Nup35,Nup37,Nup43,St13,Bag5,Nup107,Nup133,Nup93,Nupl1,Seh1l,Nup155,Nup54,Ndc1,Vcp,Nup98,Hspa12a,Pom121,Camk2d,Tpr,Atm,Bag1,Sec13,Camk2b,Camk2g,Hspa13,Cryab,Fkbp4,Hspa5,Hdac6,Hspb8,Hspa8,Hspa1l,Hsf1,Hsph1,Hspa2,Hsp90ab1,Hsp90aa1,Hspa9,Dnajb1,Bag2,Mapkapk2,Hspa14,Nup50,Nup62,Hspa4l,Nup85,Nup88,Ranbp2,Nup153,Nup210,Ccar2,Ywhae,Dnajc2,Ptge…
RHO GTPases Activate NADPH Oxidases	1.15563	0.332068	Noxo1,Pik3r4,Noxa1,Cyba,Cybb,Ncf1,Ncf2,Prkca,Prkcd,Prkcz,Rac1,Rac2,S100a8,S100a9,Pin1,Mapk1,Mapk14,Mapk3,Nox3,Pik3c3
SUMOylation of intracellular receptors	1.14701	0.337982	Pias3,Sumo2,Hdac4,Pias2,Nr1i2,Ppara,Rara,Rora,Rxra,Nr1h4,Sumo3,Thra,Ube2i,Sumo1,Nr1h3,Nr1h2,Vdr,Pias1,Pias4,Nr5a1,Nr5a2
Phase 0 - rapid depolarisation	1.15657	0.337982	Scn3b,Scn2b,Camk2d,Cacna1c,Calm1,Calm2,Calm3,Camk2b,Camk2g,Scn2a,Fgf11,Cacng7,Scn1a,Scn1b,Scn7a,Scn8a,Rangrf
Keratan sulfate/keratin metabolism	1.14729	0.343496	Slc35d2,B3gnt3,Glb1l,Gns,B4gat1,Chst1,Glb1,B4galt1,Hexa,Hexb,Lum,Galns,Ogn,Prelp,St3gal3,St3gal1,St3gal4,St3gal2,B4galt2,B3gnt2,St3gal6,B4galt5,B4galt4,B4galt6,Chst5,B4galt3,Omd,B3gnt7
DNA Double-Strand Break Repair	-1.14419	0.343496	Dna2,Tipin,Kdm4a,Pole4,H4c17,Rpa3,Babam1,Rpa1,Ppp4r2,Rfc3,H4c8,Pold4,Rnf168,Ube2v2,Abraxas1,Mus81,Topbp1,Atrip,Rfc5,Sumo2,Clspn,Rfc4,Rmi1,Nsd2,Babam2,Nhej1,Slx1b,Mdc1,Abl1,Parp2,Apbb1,Atm,Blm,Brca2,Polq,Cdk2,Chek1,Gen1,Rps27a,Eya3,Brcc3,Xrcc6,Herc2,H2ax,Polh,Hus1,Kat5,Kpna2,Mre11a,Sirt6,Chek2,Pcna,Pold1,Pold2,Pole,Pole2,Ppp5c,Prkdc,Rif1,Rad1,Rad17,Rad51b,Rad51d,Rad9a,Rfc1,Rfc2,Slx4,Uimc1,Polm,Tim…
Transcription-Coupled Nucleotide Excision Repair (TC-NER)	1.13101	0.343496	Polr2e,Ep300,Gtf2h5,Polr2l,Cul4a,Ccnh,Pole4,Zfp830,Xab2,Polr2b,Polr2g,Rpa3,Rpa1,Polr2d,Rfc3,Pold4,Polr2f,Polr2i,Uvssa,Ercc8,Rfc5,Cul4b,Rfc4,Cops8,Aqr,Cdk7,Gtf2h3,Rps27a,Cops2,Ddb1,Ercc1,Ercc2,Ercc3,Gtf2h1,Hmgn1,Polr2h,Lig1,Mnat1,Ercc4,Polr2k,Pcna,Pold1,Pold2,Pole,Pole2,Rfc1,Rfc2,Polr2a,Polr2c,Tcea1,Uba52,Ubb,Xpa,Xrcc1,Ppie,Usp7,Rbx1,Gtf2h2,Ercc6,Isy1,Pole3,Cops3,Cops5,Cops4,Cops6,Cops7a,Cops7b,Po…
O-linked glycosylation of mucins	1.1402	0.346354	Galnt12,Galnt11,Galnt18,A4gnt,Galnt14,Gcnt3,B3gnt3,Galnt10,Muc5b,B3gnt5,Galnt2,Galnt7,B3gnt6,Galnt6,Galnt5,B3gntl1,Galnt1,Galnt3,Galnt4,Gcnt1,Muc13,Muc1,St6gal1,St3gal3,St3gal1,St3gal4,St3gal2,St6galnac2,St6galnac3,St6galnac4,B3gnt2,Gcnt4,B4galt5,B4galt6,C1galt1c1,Chst4,Muc20,C1galt1,B3gnt7,B3gnt9
Calmodulin induced events	1.13025	0.348022	Adcy3,Adcy4,Adcy1,Camkk2,Adcy6,Adcy7,Adcy8,Adcy9,Grk2,Calm1,Calm2,Calm3,Pde1a,Pde1b,Pde1c,Prkaca,Prkacb,Prkca,Prkcd,Prkar1a,Prkar1b,Prkar2b,Camkk1,Adcy5
CaM pathway	1.13025	0.348022	Adcy3,Adcy4,Adcy1,Camkk2,Adcy6,Adcy7,Adcy8,Adcy9,Grk2,Calm1,Calm2,Calm3,Pde1a,Pde1b,Pde1c,Prkaca,Prkacb,Prkca,Prkcd,Prkar1a,Prkar1b,Prkar2b,Camkk1,Adcy5
CD28 co-stimulation	1.13999	0.348022	Them4,Prr5,Akt1,Akt2,Cd86,Cdc42,Rictor,Fyn,Grb2,Lck,Lyn,Grap2,Pdpk1,Pik3ca,Pik3r1,Pik3r2,Pik3r3,Rac1,Src,Map3k14,Vav1,Yes1,Akt3,Mlst8,Mtor,Map3k8,Pak2,Mapkap1,Trib3
Gamma carboxylation, hypusine formation and arylsulfatase activation	1.12682	0.351162	Dnajc24,Dph6,Proz,Dph2,Sumf2,Dhps,Dohh,Dph5,Dph3,Arsg,Fn3krp,Arsa,Eef2,Gas6,Eif5a,Furin,Dph1,Proc,Pros1,Tpst1,Tpst2,Ggcx,Icmt,Sumf1
SUMO E3 ligases SUMOylate target proteins	1.10291	0.362954	Pias3,Eid3,Ep300,Nsmce3,Rae1,Ddx17,Nupl2,Smc6,H4c17,Nsmce1,Nsmce4a,Rpa1,Nsmce2,Ing2,H4c8,Nup35,Nup37,Nup43,Rnf168,Nup107,Nup133,Nup93,Nupl1,Seh1l,Nrip1,Nup155,Zfp131,Nup54,Sumo2,Ndc1,Topors,Hdac1,Nup98,Pom121,Tpr,Mdc1,Uhrf2,Birc5,Sec13,Hdac4,Blm,Bmi1,Brca1,Cbx4,Phc3,Smc3,Ctbp1,Daxx,Dnmt1,Phc1,Hdac2,Herc2,Hic1,Hipk2,Hnrnpc,Hnrnpk,Satb2,Ikbkg,Incenp,Mbd1,Mdm2,Pias2,Ncoa1,Nfkb2,Nfkbia,Nup50,Npm1,Nr1…
Glycolysis	1.11521	0.362954	Aldob,Rae1,Nupl2,Gnpda2,Nup35,Nup37,Nup43,Nup107,Pgm2l1,Nup133,Nup93,Nupl1,Seh1l,Adpgk,Nup155,Pfkfb3,Nup54,Ndc1,Nup98,Pfkfb4,Pom121,Tpr,Aldoa,Aldoc,Sec13,Bpgm,Eno1,Eno2,Eno3,Gapdh,Gpi1,Hk1,Hk2,Hk3,Nup50,Nup62,Pfkfb2,Pfkl,Pfkm,Pgam1,Pgk1,Pkm,Nup85,Nup88,Ranbp2,Nup153,Nup210,Tpi1,Pgam2,Pfkp,Nup160,Gnpda1,Aaas,Nup188,Nup214
Miscellaneous transport and binding events	1.12319	0.364053	Magt1,Lrrc8d,Lrrc8c,Nipal1,Lrrc8b,Nipal3,Add1,Ank,Lrrc8a,Tusc3,Slc66a1,Nipal4,Ctns,Mrs2,Nipal2,Add3,Nipa2
Biosynthesis of the N-glycan precursor (dolichol lipid-linked oligosaccharide, LLO) and transfer to a nascent protein	1.11307	0.364703	Nudt14,Alg5,Alg14,Nanp,Dhdds,Alg13,Dpm3,Fuom,Alg9,Fcsk,Slc17a5,Npl,Uap1,Fpgt,Pgm3,Alg1,Neu4,Mpi,Alg3,Glb1,Cmas,Dpagt1,Dpm1,Dpm2,Gfpt1,Amdhd2,Neu1,Gne,Neu3,St6galnac6,Ctsa,Nus1,Renbp,St6gal1,St3gal3,St3gal1,St3gal4,St3gal2,St6galnac1,St6galnac2,St6galnac3,St6galnac4,St8sia2,St8sia3,St8sia4,Pmm2,Alg8,Gmds,Gnpnat1,St3gal6,Gfus,Nagk,Alg2,Slc35a1,Dolpp1,Srd5a3,Alg6,Alg12,Mvd,Nans,Pmm1,Dolk,Slc35c1
Signaling by Erythropoietin	1.1212	0.365276	Pik3cb,Rapgef1,Crkl,Gab1,Grb2,Jak2,Lyn,Pik3ca,Pik3cd,Pik3r1,Shc1,Vav1,Irs2,Pik3r5,Pik3cg
Transport of the SLBP Dependant Mature mRNA	-1.13798	0.366413	Rae1,Nupl2,Ncbp2,Nup35,Nup37,Nup43,Nup107,Nup133,Nup93,Nupl1,Seh1l,Nup155,Nup54,Ndc1,Ncbp1,Nup98,Pom121,Tpr,Sec13,Eif4e,Nup50,Nup62,Nup85,Nup88,Ranbp2,Slbp,Nxf1,Nup153,Alyref,Nup210,Nup160,Aaas,Nup188,Nup214
Synthesis of substrates in N-glycan biosythesis	1.11226	0.368431	Nudt14,Alg5,Nanp,Dhdds,Dpm3,Fuom,Fcsk,Slc17a5,Npl,Uap1,Fpgt,Pgm3,Neu4,Mpi,Glb1,Cmas,Dpm1,Dpm2,Gfpt1,Amdhd2,Neu1,Gne,Neu3,St6galnac6,Ctsa,Nus1,Renbp,St6gal1,St3gal3,St3gal1,St3gal4,St3gal2,St6galnac1,St6galnac2,St6galnac3,St6galnac4,St8sia2,St8sia3,St8sia4,Pmm2,Gmds,Gnpnat1,St3gal6,Gfus,Nagk,Slc35a1,Dolpp1,Srd5a3,Mvd,Nans,Pmm1,Dolk,Slc35c1
Hyaluronan metabolism	1.10813	0.380201	Gusb,Cd44,Has2,Has3,Hexa,Hexb,Hmmr,Cemip,Hyal1,Hyal2,Lyve1,Slc9a1,Chp1,Abcc5,Stab2
Cargo trafficking to the periciliary membrane	1.09833	0.384865	Exoc2,Arl13b,Exoc8,Exoc1,Bbip1,Cngb1,Bbs7,Bbs5,Exoc5,Nphp3,Unc119b,Gbf1,Ttc8,Arf4,Cct2,Cct3,Cct4,Cct5,Cct8,Bbs12,Asap1,Exoc3,Rab8a,Pde6d,Pkd2,Rab11fip3,Rab3ip,Rp2,Exoc4,Exoc7,Rab11a,Tcp1,Arl6,Arl3,Smo,Bbs9,Mkks,Lztfl1,Inpp5e
DARPP-32 events	1.09731	0.388119	Pde4d,Pde4c,Cdk5,Pde4a,Pde4b,Prkaca,Prkacb,Ppp2r1a,Ppp1ca,Ppp1r1b,Ppp2ca,Ppp2cb,Prkar1a,Prkar1b,Prkar2b
G alpha (q) signalling events	-1.10151	0.388119	Gng11,Abhd6,Lpar6,Nts,Daglb,Ffar2,Ffar1,Ffar3,P2ry6,Dgkz,Dagla,Ffar4,Gpr68,Grm5,Abhd12,Ghsr,Agtr1a,App,Dgkg,Grk2,Bdkrb1,Bdkrb2,Dgkq,Btk,Cck,Chrm1,Dgka,P2ry10,Edn1,Edn2,Edn3,Ednra,Ednrb,Egfr,F2r,F2rl1,F2rl2,Fpr2,Gast,Gcg,Gna11,Gna14,Gnaq,Gnb1,Gnb2,Gnb4,Gnb5,Gng10,Gng2,Gng4,Gng5,Gngt2,Gnrh1,Gnrhr,Gpr65,Lpar1,Nmur1,Grb2,Hcrt,Hbegf,Hras,Hrh1,Htr2b,Kiss1r,Itpr1,Itpr2,Itpr3,Kras,Anxa1,Ltb4r1,Rgs13,Gpr1…
mRNA Capping	1.09297	0.388119	Polr2e,Gtf2h5,Polr2l,Ccnh,Polr2b,Polr2g,Rnmt,Ncbp2,Gtf2f2,Polr2d,Polr2f,Polr2i,Ncbp1,Cdk7,Gtf2h3,Ercc2,Ercc3,Gtf2h1,Polr2h,Mnat1,Polr2k,Polr2a,Polr2c,Supt5,Gtf2h2,Rngtt,Gtf2f1
Class I peroxisomal membrane protein import	1.09763	0.388119	Fis1,Atad1,Pex12,Pex13,Pex26,Acbd5,Abcd1,Aldh3a2,Pex11b,Pex16,Pex19,Abcd3,Slc25a17,Pex14,Pex3,Pxmp4,Abcd2
Inwardly rectifying K+ channels	1.09538	0.391742	Gng11,Gabbr2,Gnb1,Gnb2,Gnb4,Gnb5,Gng10,Gng2,Gng4,Gng5,Gngt2,Kcnj10,Kcnj16,Kcnj2,Kcnj8,Kcnj9,Abcc8,Abcc9,Gabbr1,Kcnj1,Gng13
Synthesis of PIPs at the Golgi membrane	1.08691	0.391742	Pi4k2b,Fig4,Vac14,Pi4kb,Pik3r4,Arf1,Arf3,Sacm1l,Pi4k2a,Pik3c2a,Pik3c2g,Pikfyve,Ocrl,Pi4ka,Pik3c3,Inpp5e
SUMOylation of transcription cofactors	1.09338	0.391791	Pias3,Ep300,Ddx17,Ing2,Nrip1,Zfp131,Sumo2,Topors,Uhrf2,Bmi1,Cbx4,Phc3,Ctbp1,Daxx,Phc1,Hipk2,Mbd1,Pias2,Ncoa1,Npm1,Ring1,Rnf2,Sin3a,Sumo3,Phc2,Ube2i,Sumo1,Pcgf2,Pias1,Park7,Pias4,Casp8ap2,Mrtfa,Safb,Scmh1,Cbx8
Synthesis of PA	1.09079	0.391802	Lpcat4,Pla2g12a,Acp6,Agpat2,Gpat3,Agpat4,Gpat4,Gpd1l,Ddhd2,Liph,Miga2,Alpi,Pla2g4d,Lpcat1,Gpd1,Gpd2,Gnpat,Gpam,Pla2g4b,Ddhd1,Pla2r1,Pla2g2a,Pla2g4a,Pla2g5,Pld2,Gpat2,Miga1,Agpat5,Agpat1,Pla2g10,Pla2g2f,Agpat3,Lclat1
Processing of DNA double-strand break ends	-1.11066	0.391802	Dna2,Tipin,H4c17,Rpa3,Babam1,Rpa1,Ppp4r2,Rfc3,H4c8,Rnf168,Ube2v2,Abraxas1,Topbp1,Atrip,Rfc5,Sumo2,Clspn,Rfc4,Rmi1,Nsd2,Babam2,Mdc1,Atm,Blm,Cdk2,Chek1,Brcc3,Herc2,H2ax,Hus1,Kat5,Mre11a,Sirt6,Rad1,Rad17,Rad9a,Rfc2,Uimc1,Timeless,Top3a,Ube2i,Sumo1,Wrn,Ppp4c,H4c11,H2bc11,H2bc3,H2bc21,Rnf8,Pias4,Exo1,Trp53bp1,Nbn,Rmi2,Ube2n,Rbbp8,H4c14
Transport of the SLBP independent Mature mRNA	-1.10818	0.393722	Rae1,Nupl2,Ncbp2,Nup35,Nup37,Nup43,Nup107,Nup133,Nup93,Nupl1,Seh1l,Nup155,Nup54,Ndc1,Ncbp1,Nup98,Pom121,Tpr,Sec13,Eif4e,Nup50,Nup62,Nup85,Nup88,Ranbp2,Nxf1,Nup153,Alyref,Nup210,Nup160,Aaas,Nup188,Nup214
G alpha (z) signalling events	1.08275	0.403884	Gng11,Adcy3,Adcy4,Adcy1,Adcy6,Adcy7,Adcy8,Adcy9,Adra2a,Adra2c,Gnb1,Gnb2,Gnb4,Gnb5,Gng10,Gng2,Gng4,Gng5,Gngt2,Rgs16,Adcy5,Gng13
Loss of Nlp from mitotic centrosomes	1.07165	0.408417	Cep152,Haus6,Nde1,Haus3,Akap9,Ssna1,Ccp110,Dctn2,Cep192,Tubg1,Csnk1d,Haus5,Alms1,Ofd1,Haus7,Cep57,Cep72,Ckap5,Haus8,Clasp1,Sdccag8,Cdk1,Dctn1,Sfi1,Dync1h1,Dync1i2,Mapre1,Hsp90aa1,Cep250,Cdk5rap2,Nedd1,Nek2,Odf2,Pafah1b1,Pcm1,Pcnt,Prkaca,Plk1,Ppp2r1a,Prkar2b,Cep290,Dctn3,Plk4,Cep135,Actr1a,Tuba1a,Tuba4a,Tubb5,Cenpj,Ywhae,Ywhag,Dynll1,Cetn2,Cntrl,Csnk1e,Cep63,Cep76,Haus1,Tubb4b
Loss of proteins required for interphase microtubule organization from the centrosome	1.07165	0.408417	Cep152,Haus6,Nde1,Haus3,Akap9,Ssna1,Ccp110,Dctn2,Cep192,Tubg1,Csnk1d,Haus5,Alms1,Ofd1,Haus7,Cep57,Cep72,Ckap5,Haus8,Clasp1,Sdccag8,Cdk1,Dctn1,Sfi1,Dync1h1,Dync1i2,Mapre1,Hsp90aa1,Cep250,Cdk5rap2,Nedd1,Nek2,Odf2,Pafah1b1,Pcm1,Pcnt,Prkaca,Plk1,Ppp2r1a,Prkar2b,Cep290,Dctn3,Plk4,Cep135,Actr1a,Tuba1a,Tuba4a,Tubb5,Cenpj,Ywhae,Ywhag,Dynll1,Cetn2,Cntrl,Csnk1e,Cep63,Cep76,Haus1,Tubb4b
Purine catabolism	1.0718	0.408891	Adprm,Nt5c1a,Nt5c1b,Nudt9,Nudt16,Nt5c2,Gda,Itpa,Nudt18,Nudt15,Nudt1,Nt5c,Pnp,Nudt5,Xdh,Nt5e
Dual incision in TC-NER	1.06441	0.414776	Polr2e,Ep300,Gtf2h5,Polr2l,Cul4a,Ccnh,Pole4,Zfp830,Xab2,Polr2b,Polr2g,Rpa3,Rpa1,Polr2d,Rfc3,Pold4,Polr2f,Polr2i,Uvssa,Ercc8,Rfc5,Cul4b,Rfc4,Aqr,Cdk7,Gtf2h3,Rps27a,Ddb1,Ercc1,Ercc2,Ercc3,Gtf2h1,Hmgn1,Polr2h,Mnat1,Ercc4,Polr2k,Pcna,Pold1,Pold2,Pole,Pole2,Rfc1,Rfc2,Polr2a,Polr2c,Tcea1,Uba52,Ubb,Xpa,Ppie,Usp7,Rbx1,Gtf2h2,Ercc6,Isy1,Pole3,Polk,Prpf19
RNA Polymerase III Transcription	-1.08872	0.414776	Gtf3c3,Polr2e,Polr2l,Gtf3a,Brf2,Polr3k,Polr3d,Gtf3c6,Polr3g,Snapc5,Snapc2,Polr2f,Polr3gl,Gtf3c1,Gtf3c5,Polr3f,Polr3b,Gtf3c2,Gtf3c4,Polr3c,Snapc1,Snapc3,Crcp,Polr2h,Polr2k,Pou2f1,Polr1c,Bdp1,Tbp,Polr3a,Polr3e
RNA Polymerase III Transcription Initiation	-1.08872	0.414776	Gtf3c3,Polr2e,Polr2l,Gtf3a,Brf2,Polr3k,Polr3d,Gtf3c6,Polr3g,Snapc5,Snapc2,Polr2f,Polr3gl,Gtf3c1,Gtf3c5,Polr3f,Polr3b,Gtf3c2,Gtf3c4,Polr3c,Snapc1,Snapc3,Crcp,Polr2h,Polr2k,Pou2f1,Polr1c,Bdp1,Tbp,Polr3a,Polr3e
Base Excision Repair	1.07069	0.418135	Pole4,Adprs,H4c17,Rpa3,Rpa1,Pot1a,H2aj,Rfc3,H4c8,Pold4,Neil3,Mutyh,Acd,Smug1,Mpg,Rfc5,Neil1,Rfc4,Parp2,Apex1,H2az2,H2ac18,H2ax,Lig1,Mbd4,Nthl1,Ogg1,Pcna,Polb,Pold1,Pold2,Pole,Pole2,H2az1,Rfc1,Rfc2,Tdg,Terf1,Terf2,Ung,Neil2,Xrcc1,H4c11,H2ac10,H2bc11,H2bc3,H2bc21,Terf2ip,Pole3,H4c14
Synthesis of PIPs at the plasma membrane	1.06626	0.418989	Pi4k2b,Plekha8,Rab14,Plekha1,Inpp4b,Pik3r6,Inpp5j,Inpp4a,Mtmr3,Pik3cb,Rab5a,Pip4k2b,Plekha5,Plekha6,Pik3c2b,Arf1,Bmx,Mtmr9,Inpp5d,Mtm1,Plekha3,Plekha2,Pi4k2a,Pik3c2a,Pik3c2g,Pik3ca,Pik3cd,Pik3r1,Pik3r2,Pik3r3,Pip5k1c,Pip4k2a,Pip5k1b,Pip5k1a,Pip4k2c,Inpp5k,Pten,Ptpn13,Rab4a,Rufy1,Mtmr1,Synj2,Mtmr6,Pik3r5,Ocrl,Pik3cg,Mtmr14
Energy dependent regulation of mTOR by LKB1-AMPK	1.0569	0.421588	Lamtor4,Lamtor1,Rraga,Lamtor5,Cab39l,Slc38a9,Strada,Prkaa1,Prkaa2,Prkag2,Cab39,Lamtor2,Ppm1a,Prkab1,Rragd,Rheb,Stk11,Rragc,Lamtor3,Mlst8,Mtor,Stradb,Tsc1
Glycosaminoglycan metabolism	1.05904	0.422681	Chpf2,Xylt1,Slc35d2,Csgalnact1,Hs3st4,Gpc2,Chst14,B3gnt3,B3gat3,Chsy1,Chpf,Glb1l,Gns,Slc35b3,B4gat1,Chst1,Gusb,Chst15,Glb1,Bgn,Cd44,Dcn,Slc26a2,Ext1,Ext2,B4galt1,Gpc1,Gpc4,Has2,Has3,Hexa,Hexb,Hmmr,Hpse,Cemip,Hs3st1,Hs3st3a1,Sdc2,Hspg2,Ndst1,Hyal1,Hyal2,Ids,Lyve1,Dse,Lum,Ndst2,Hs6st1,Galns,Ogn,Prelp,B3galt6,Hgsnat,St3gal3,St3gal1,St3gal4,St3gal2,Xylt2,Slc9a1,B4galt2,B3gnt2,Sdc1,Sdc3,Sdc4,Hpse2,B4g…
Formation of the beta-catenin:TCF transactivating complex	1.0565	0.422749	Ep300,Pygo2,Leo1,Hdac1,Bcl9,Ctnnb1,Bcl9l,Kat5,Lef1,Rbbp5,Men1,Cdc73,Smarca4,Tcf7,Tcf7l2,Tle1,Tle3,Tle4,Ruvbl1,Ash2l
RA biosynthesis pathway	-1.07304	0.426388	Rdh10,Cyp26b1,Rdh14,Aldh8a1,Rdh1,Rdh13,Adh1,Aldh1a1,Dhrs9,Sdr16c5,Cyp26a1,Rdh11,Aldh1a2,Dhrs3,Aldh1a3,Adh4,Dhrs4
p75NTR signals via NF-kB	1.05427	0.427354	Rps27a,Ikbkb,Irak1,Myd88,Nfkb1,Nfkbia,Ngf,Ngfr,Sqstm1,Prkci,Rela,Traf6,Uba52,Ubb,Ripk2
Regulation of TP53 Activity	1.05315	0.428766	Dna2,Gatad2b,Ing5,Ep300,Taf12,Taf13,Rffl,Kmt5a,Rpa3,Rpa1,Taf11,Dyrk2,Ing2,Rfc3,Meaf6,Taf15,Gatad2a,Ppp1r13l,Topbp1,Atrip,Tpx2,Rfc5,Brpf3,Taf4b,Prkaa1,Hdac1,Rfc4,Taf1,Rmi1,Chd4,Prkaa2,Pip4k2b,Prkag2,Taf9,Prr5,Akt1,Akt2,Ehmt2,Atm,Blm,Ehmt1,L3mbtl1,Nuak1,Ccng1,Cdk1,Cdk2,Cdk5,Chek1,Taf3,Rps27a,Trp53bp2,Csnk2a1,Csnk2a2,Csnk2b,Daxx,Rictor,Brpf1,Taf9b,Hdac2,Rnf34,Hipk1,Hipk2,Hus1,Kat5,Rbbp7,Supt16,Mapka…
RNA Pol II CTD phosphorylation and interaction with CE	1.04683	0.428766	Polr2e,Gtf2h5,Polr2l,Ccnh,Polr2b,Polr2g,Rnmt,Gtf2f2,Polr2d,Polr2f,Polr2i,Cdk7,Gtf2h3,Ercc2,Ercc3,Gtf2h1,Polr2h,Mnat1,Polr2k,Polr2a,Polr2c,Supt5,Gtf2h2,Rngtt,Gtf2f1
DAG and IP3 signaling	1.0446	0.429066	Adcy3,Adcy4,Adcy1,Camkk2,Adcy6,Adcy7,Adcy8,Adcy9,Grk2,Calm1,Calm2,Calm3,Pde1a,Pde1b,Pde1c,Prkaca,Prkacb,Prkca,Prkcd,Prkce,Prkar1a,Prkar1b,Prkar2b,Camkk1,Adcy5
Gap-filling DNA repair synthesis and ligation in TC-NER	1.0456	0.435066	Polr2e,Ep300,Gtf2h5,Polr2l,Cul4a,Ccnh,Pole4,Zfp830,Xab2,Polr2b,Polr2g,Rpa3,Rpa1,Polr2d,Rfc3,Pold4,Polr2f,Polr2i,Uvssa,Ercc8,Rfc5,Cul4b,Rfc4,Aqr,Cdk7,Gtf2h3,Rps27a,Ddb1,Ercc2,Ercc3,Gtf2h1,Hmgn1,Polr2h,Lig1,Mnat1,Polr2k,Pcna,Pold1,Pold2,Pole,Pole2,Rfc1,Rfc2,Polr2a,Polr2c,Tcea1,Uba52,Ubb,Xrcc1,Ppie,Usp7,Rbx1,Gtf2h2,Ercc6,Isy1,Pole3,Polk,Prpf19
Telomere Extension By Telomerase	-1.06339	0.438976	Nop10,Ppp6c,Gar1,Pot1a,Acd,Ankrd28,Rtel1,Pif1,Cdk2,Dkc1,Ppp6r3,Nhp2,Wrap53,Terf1,Terf2,Terf2ip
Kinesins	1.04191	0.438976	Cenpe,Kifc1,Tubb6,Kif18b,Kif23,Kif26b,Tubb2b,Kif2c,Tubal3,Klc4,Kif20b,Kif22,Kif26a,Kif15,Kif11,Kif13b,Kif16b,Kif1b,Kif1c,Kif2a,Kif21a,Kif21b,Kif3a,Kif3b,Kif3c,Kif5b,Kifap3,Kif20a,Tuba1a,Tuba1b,Tuba4a,Tubb3,Kif6,Racgap1,Tubb4b
Downstream signaling of activated FGFR1	1.03846	0.442036	Frs2,Flrt3,Flrt2,Fgf2,Fgf9,Fgfr1,Gab1,Grb2,Hras,Kras,Pik3ca,Pik3r1,Plcg1,Ptpn11,Shc1,Sos1
Intraflagellar transport	1.03751	0.445544	Ift27,Dynlrb1,Dynlt2a3,Ift22,Ift172,Ift74,Tubb6,Dynll2,Ift80,Ttc30b,Hspb11,Ttc21b,Tubb2b,Ift140,Ift57,Traf3ip1,Tnpo1,Ift43,Trip11,Ift46,Cluap1,Dync2h1,Ift81,Ift122,Ift52,Kif3a,Kif3b,Kif3c,Kifap3,Ift88,Tuba1a,Tuba1b,Tuba4a,Tubb3,Ift20,Dynll1,Tubb4b
BBSome-mediated cargo-targeting to cilium	1.02965	0.446069	Bbip1,Bbs7,Bbs5,Ttc8,Cct2,Cct3,Cct4,Cct5,Cct8,Bbs12,Rab3ip,Tcp1,Arl6,Smo,Bbs9,Mkks,Lztfl1
Interleukin-6 family signaling	-1.04962	0.446069	Il31,Cbl,Socs3,Cntfr,Ctf1,Il6,Il6ra,Il6st,Jak2,Lif,Lifr,Osm,Osmr,Ptpn11,Stat3,Tyk2,Il31ra,Clcf1
Recruitment of mitotic centrosome proteins and complexes	1.04016	0.446751	Cep152,Tubgcp6,Haus6,Nde1,Haus3,Akap9,Ssna1,Ccp110,Tubgcp5,Dctn2,Cep192,Tubg1,Csnk1d,Haus5,Mzt2,Alms1,Ofd1,Haus7,Tubgcp2,Cep57,Cep72,Ckap5,Haus8,Clasp1,Mzt1,Sdccag8,Cdk1,Cdk11b,Dctn1,Sfi1,Dync1h1,Dync1i2,Mapre1,Hsp90aa1,Cep250,Cdk5rap2,Nedd1,Nek2,Odf2,Pafah1b1,Pcm1,Pcnt,Prkaca,Plk1,Ppp2r1a,Prkar2b,Tubgcp4,Cep290,Dctn3,Plk4,Cep135,Actr1a,Tuba1a,Tuba4a,Tubb5,Cenpj,Ywhae,Ywhag,Dynll1,Cetn2,Cntrl,Csn…
Centrosome maturation	1.04016	0.446751	Cep152,Tubgcp6,Haus6,Nde1,Haus3,Akap9,Ssna1,Ccp110,Tubgcp5,Dctn2,Cep192,Tubg1,Csnk1d,Haus5,Mzt2,Alms1,Ofd1,Haus7,Tubgcp2,Cep57,Cep72,Ckap5,Haus8,Clasp1,Mzt1,Sdccag8,Cdk1,Cdk11b,Dctn1,Sfi1,Dync1h1,Dync1i2,Mapre1,Hsp90aa1,Cep250,Cdk5rap2,Nedd1,Nek2,Odf2,Pafah1b1,Pcm1,Pcnt,Prkaca,Plk1,Ppp2r1a,Prkar2b,Tubgcp4,Cep290,Dctn3,Plk4,Cep135,Actr1a,Tuba1a,Tuba4a,Tubb5,Cenpj,Ywhae,Ywhag,Dynll1,Cetn2,Cntrl,Csn…
snRNP Assembly	-1.05084	0.449859	Snupn,Gemin2,Rae1,Nupl2,Snrpd3,Snrpg,Nup35,Gemin7,Nup37,Snrpf,Nup43,Wdr77,Nup107,Nup133,Nup93,Nupl1,Seh1l,Nup155,Nup54,Ndc1,Nup98,Gemin8,Snrpd2,Pom121,Tpr,Sec13,Gemin4,Nup50,Nup62,Tgs1,Nup85,Nup88,Ranbp2,Gemin5,Smn1,Snrpb,Snrpd1,Snrpe,Ddx20,Nup153,Nup210,Nup160,Aaas,Prmt5,Nup188,Nup214
Metabolism of non-coding RNA	-1.05084	0.449859	Snupn,Gemin2,Rae1,Nupl2,Snrpd3,Snrpg,Nup35,Gemin7,Nup37,Snrpf,Nup43,Wdr77,Nup107,Nup133,Nup93,Nupl1,Seh1l,Nup155,Nup54,Ndc1,Nup98,Gemin8,Snrpd2,Pom121,Tpr,Sec13,Gemin4,Nup50,Nup62,Tgs1,Nup85,Nup88,Ranbp2,Gemin5,Smn1,Snrpb,Snrpd1,Snrpe,Ddx20,Nup153,Nup210,Nup160,Aaas,Prmt5,Nup188,Nup214
Chondroitin sulfate/dermatan sulfate metabolism	1.02245	0.452496	Chpf2,Xylt1,Csgalnact1,Gpc2,Chst14,B3gat3,Chsy1,Chpf,Chst15,Bgn,Dcn,Gpc1,Gpc4,Hexa,Hexb,Sdc2,Hspg2,Hyal1,Ids,Dse,B3galt6,Xylt2,Sdc1,Sdc3,Sdc4,B4galt7,Cspg4,Gpc6,Chst12,Cspg5
RAB geranylgeranylation	-1.0456	0.455614	Rab39b,Rab32,Rab13,Rab14,Rab43,Rab3b,Rab8b,Rab38,Rab31,Rab5a,Rab1b,Rab2b,Rab35,Rab27a,Chml,Rab27b,Rab44,Rab8a,Ptp4a2,Rab1a,Rab10,Rab11b,Rab12,Rab17,Rab18,Rab19,Rab20,Rab22a,Rab24,Rab33a,Rab33b,Rab3a,Rab3d,Rab4a,Rab4b,Rab5b,Rab5c,Rab6a,Rab7,Rabggtb,Rab21,Rab25,Rab11a,Rabggta,Rab9,Rab9b,Rab37,Rab2a,Rab40c,Rab7b
Keratan sulfate biosynthesis	1.02404	0.455863	Slc35d2,B3gnt3,B4gat1,Chst1,B4galt1,Lum,Ogn,Prelp,St3gal3,St3gal1,St3gal4,St3gal2,B4galt2,B3gnt2,St3gal6,B4galt5,B4galt4,B4galt6,Chst5,B4galt3,Omd,B3gnt7
Heparan sulfate/heparin (HS-GAG) metabolism	1.02674	0.456674	Xylt1,Slc35d2,Hs3st4,Gpc2,B3gat3,Glb1l,Gusb,Glb1,Bgn,Dcn,Ext1,Ext2,Gpc1,Gpc4,Hpse,Hs3st1,Hs3st3a1,Sdc2,Hspg2,Ndst1,Ids,Ndst2,Hs6st1,B3galt6,Hgsnat,Xylt2,Sdc1,Sdc3,Sdc4,Hpse2,B4galt7,Hs3st3b1,Cspg4,Gpc6,Hs2st1,Sgsh,Naglu,Cspg5,Hs3st2
RNA Polymerase I Transcription Termination	1.01844	0.457844	Polr1h,Polr2e,Gtf2h5,Polr2l,Ccnh,Polr2f,Taf1d,Cdk7,Gtf2h3,Ercc2,Ercc3,Gtf2h1,Polr2h,Mnat1,Polr2k,Cavin1,Polr1c,Polr1b,Polr1a,Taf1a,Taf1b,Taf1c,Tbp,Ttf1,Gtf2h2,Polr1f,Polr1e
Cyclin A/B1/B2 associated events during G2/M transition	1.02173	0.463504	Ccnh,Xpo1,Ppp2r2a,Ccnb1,Pkmyt1,Ppme1,Ccnb2,Cdc25a,Cdc25b,Cdc25c,Cdk1,Cdk2,Cdk7,Mnat1,Plk1,Ppp2r1a,Ppp2ca,Ppp2cb
Signaling by BMP	1.01301	0.468014	Ube2d3,Smurf2,Smurf1,Acvr2a,Acvr2b,Acvrl1,Bmp2,Bmpr1a,Bmpr2,Amhr2,Fstl1,Smad1,Smad4,Smad5,Smad6,Smad7,Nog,Ube2d1,Zfyve16,Grem2
AURKA Activation by TPX2	1.01138	0.471691	Cep152,Haus6,Nde1,Haus3,Akap9,Ssna1,Ccp110,Dctn2,Cep192,Tubg1,Csnk1d,Haus5,Tpx2,Alms1,Ofd1,Haus7,Cep57,Cep72,Ckap5,Haus8,Clasp1,Sdccag8,Cdk1,Dctn1,Sfi1,Dync1h1,Dync1i2,Mapre1,Hmmr,Hsp90aa1,Cep250,Cdk5rap2,Nedd1,Nek2,Odf2,Pafah1b1,Pcm1,Pcnt,Prkaca,Plk1,Ppp2r1a,Prkar2b,Cep290,Dctn3,Plk4,Cep135,Actr1a,Tuba1a,Tuba4a,Tubb5,Cenpj,Ywhae,Ywhag,Dynll1,Cetn2,Cntrl,Csnk1e,Cep63,Cep76,Haus1,Tubb4b
A tetrasaccharide linker sequence is required for GAG synthesis	1.0094	0.471894	Xylt1,Gpc2,B3gat3,Bgn,Dcn,Gpc1,Gpc4,Sdc2,Hspg2,B3galt6,Xylt2,Sdc1,Sdc3,Sdc4,B4galt7,Cspg4,Gpc6,Cspg5
GABA B receptor activation	1.00271	0.471894	Gng11,Adcy3,Adcy4,Adcy1,Adcy6,Adcy7,Adcy8,Adcy9,Gabbr2,Gnat3,Gnai1,Gnai2,Gnai3,Gnal,Gnb1,Gnb2,Gnb4,Gnb5,Gng10,Gng2,Gng4,Gng5,Gngt2,Kcnj10,Kcnj16,Kcnj2,Kcnj9,Gabbr1,Adcy5,Gng13
Activation of GABAB receptors	1.00271	0.471894	Gng11,Adcy3,Adcy4,Adcy1,Adcy6,Adcy7,Adcy8,Adcy9,Gabbr2,Gnat3,Gnai1,Gnai2,Gnai3,Gnal,Gnb1,Gnb2,Gnb4,Gnb5,Gng10,Gng2,Gng4,Gng5,Gngt2,Kcnj10,Kcnj16,Kcnj2,Kcnj9,Gabbr1,Adcy5,Gng13
RNA Polymerase III Transcription Initiation From Type 2 Promoter	-1.02712	0.476154	Gtf3c3,Polr2e,Polr2l,Polr3k,Polr3d,Gtf3c6,Polr3g,Polr2f,Polr3gl,Gtf3c1,Gtf3c5,Polr3f,Polr3b,Gtf3c2,Gtf3c4,Polr3c,Crcp,Polr2h,Polr2k,Polr1c,Bdp1,Tbp,Polr3a,Polr3e
Cytochrome P450 - arranged by substrate type	-1.0234	0.477937	Cyp4a29,Fdx2,Cyp26b1,Cyp4v3,Cyp2c66,Cyp27a1,Cyp2u1,Cyp4f18,Cyp2c55,Cyp2s1,Cyp4f40,Cyp4a30b,Ahr,Cyp11b1,Arnt,Cyp11a1,Cyp19a1,Cyp21a1,Cyp26a1,Cyp2j6,Cyp3a13,Cyp4b1,Cyp51,Cyp7b1,Fdx1,Fdxr,Ncoa1,Ncoa2,Pomc,Ptgis,Rxra,Nr1h4,Cyp3a41a,Tbxas1,Cyp2w1,Cyp39a1,Cyp3a25,Cyp2d22,Cyp4f14
Notch-HLH transcription pathway	1.00051	0.478912	Snw1,Hdac11,Hdac8,Maml1,Hdac10,Maml3,Hdac1,Maml2,Hdac4,Kat2a,Hdac2,Hdac6,Tbl1xr1,Notch1,Notch4,Kat2b,Rbpj,Ncor2,Tbl1x,Hdac7
Translesion synthesis by POLK	0.988572	0.487509	Rpa3,Rpa1,Rfc3,Mad2l2,Rfc5,Rfc4,Rps27a,Pcna,Rfc1,Rev3l,Rfc2,Uba52,Ubb,Rev1,Polk
Translesion synthesis by POLI	0.986372	0.48822	Rpa3,Rpa1,Rfc3,Mad2l2,Rfc5,Rfc4,Rps27a,Pcna,Rfc1,Rev3l,Rfc2,Uba52,Ubb,Rev1,Poli
Cell Cycle Checkpoints	1.01085	0.497895	Dna2,Cenpe,Ska2,Anapc11,Cenpp,Anapc2,Psmd6,Cdc26,Spc25,Cenpm,Dsn1,Nuf2,Psmd12,Psmd5,Pmf1,Ndc80,Psmc6,Mis12,Psmd9,Nde1,H4c17,Spc24,Itgb3bp,Zwilch,Dynll2,Rpa3,Babam1,Rpa1,Sgo2a,Ube2c,Anapc10,Psmd11,B9d2,Rfc3,H4c8,Nup37,Nup43,Cdc16,Mcm10,Rnf168,Psmd1,Spdl1,Ube2v2,Abraxas1,Nup107,Psme4,Xpo1,Dync1li2,Nup133,Topbp1,Atrip,Dync1li1,Cenpu,Ccnb1,Seh1l,Rfc5,Cenpn,Pkmyt1,Sgo1,Clspn,Nup98,Rfc4,Kif2c,Psmb11,Rm…
Neurexins and neuroligins	0.98004	0.502052	Epb41,Lrrtm2,Grm5,Cask,Dbnl,Dlg4,Epb41l2,Epb41l3,Nlgn2,Dlg3,Shank3,Homer1,Homer2,Dlgap1,Epb41l5,Dlgap4
SLC-mediated transmembrane transport	-1.00869	0.505442	Slc41a1,Slc35a3,Slc5a9,Slc47a1,Slc25a26,Slc44a1,Slc38a2,Slc15a4,Slc5a6,Slc25a22,Slc44a2,Slc7a6,Slco2b1,Slc9a9,Slc30a5,Slc6a20a,Rsc1a1,Slc5a11,Slc44a4,Slc35d2,Slc36a4,Slc17a5,Slc25a18,Slc26a11,Slc39a4,Slc43a1,Slc8b1,Slc16a10,Slc9a3,Pdzd11,Slc28a2,Slc9a6,Slc38a1,Slc17a7,Slc26a6,Slc28a1,Slc13a5,Slc39a3,Slc39a6,Slc6a19,Ahcyl2,Slc24a4,Arl2bp,Slc12a6,Slc14a1,Slco4a1,Slc22a7,Slco3a1,Slc10a6,Slc2a13,Slc3…
Recruitment of NuMA to mitotic centrosomes	0.980615	0.513637	Cep152,Tubgcp6,Haus6,Nde1,Haus3,Tubb6,Akap9,Ssna1,Ccp110,Numa1,Tubgcp5,Dctn2,Cep192,Tubg1,Csnk1d,Haus5,Mzt2,Alms1,Ofd1,Tubb2b,Haus7,Tubgcp2,Cep57,Cep72,Tubal3,Ckap5,Haus8,Clasp1,Mzt1,Sdccag8,Cdk1,Dctn1,Sfi1,Dync1h1,Dync1i2,Mapre1,Hsp90aa1,Cep250,Cdk5rap2,Nedd1,Nek2,Odf2,Pafah1b1,Pcm1,Pcnt,Prkaca,Plk1,Ppp2r1a,Prkar2b,Tubgcp4,Cep290,Dctn3,Plk4,Cep135,Actr1a,Tuba1a,Tuba1b,Tuba4a,Tubb3,Tubb5,Cenpj,Yw…
Role of phospholipids in phagocytosis	-0.980503	0.525479	Plcg2,Plpp5,Pld4,Pik3cb,Cd3g,Cd247,Fcgr1,Fcgr2b,Fcgr4,Pik3ca,Pik3r1,Pik3r2,Prkcd,Prkce,Plcg1,Pld2,Pld3,Pla2g6,Syk
O-glycosylation of TSR domain-containing proteins	-0.97584	0.532254	Adamtsl4,Adamtsl5,Spon2,Adamts17,Spon1,Adamts15,Adamts7,Adamts6,Adamts12,Thsd4,Adamts1,Pofut2,Adamts13,Cfp,Adamts2,Sema5b,B3glct,Adamts5,Adamts20,Adamts10
Interleukin-2 family signaling	0.951108	0.533122	Pik3cb,Csf2ra,Grb2,Ptpn6,Il15,Il15ra,Il2rb,Il2rg,Il9r,Inpp5d,Jak2,Jak3,Lck,Pik3ca,Pik3cd,Pik3r1,Pik3r2,Pik3r3,Ptk2b,Shc1,Sos1,Sos2,Stat3,Stat5a,Stat5b,Syk,Il21
Nonhomologous End-Joining (NHEJ)	0.955356	0.538532	H4c17,H4c8,Rnf168,Ube2v2,Nsd2,Nhej1,Mdc1,Atm,Xrcc6,Herc2,H2ax,Kat5,Mre11a,Prkdc,Rif1,Polm,Sumo1,Xrcc5,Paxip1,Tdp2,Poll,H4c11,H2bc11,H2bc3,H2bc21,Rnf8,Pias4,Trp53bp1,Nbn,Ube2n,Dclre1c,H4c14
Postmitotic nuclear pore complex (NPC) reformation	-0.969746	0.538532	Rcc1,Nup35,Nup37,Nup43,Nup107,Nup133,Nup93,Seh1l,Nup155,Ndc1,Nup98,Pom121,Sec13,Nup85,Ran,Rangap1,Ube2i,Sumo1,Nup160,Ahctf1,Nup188
Transport of vitamins, nucleosides, and related molecules	0.94198	0.543926	Slc35a3,Slc5a6,Slco2b1,Slc35d2,Pdzd11,Slc28a2,Slc28a1,Arl2bp,Slco4a1,Slco3a1,Slc35b3,Slc33a1,Slc25a4,Slc25a5,Lcn12,Slc35d1,Slc28a3,Slc35a2,Arl2,Slco2a1,Slc35a1,Slc35b4,Slc27a1,Slc27a4,Slc27a6,Slc29a1,Slc35c1
Sphingolipid de novo biosynthesis	0.947014	0.544014	Sptssb,Acer3,Acer2,Ormdl3,Ormdl2,Cers4,Samd8,Aldh3b1,Plpp3,Cert1,Prkd2,Degs2,Csnk1g2,Kdsr,Cers5,Sptssa,Sptlc1,Acer1,Sgpp2,Sgms2,Prkd3,Osbp,Fa2h,Cers2,Aldh3a2,Sgms1,Cers6,Ppm1l,Degs1,Sgpp1,Plpp2,Plpp1,Spns2,Sgpl1,Sptlc2,Sphk2,Ormdl1,Vapa
Acyl chain remodelling of PE	-0.964743	0.544379	Lpcat4,Pla2g12a,Plbd1,Mboat2,Pnpla8,Pla2g4c,Abhd4,Pla2g4f,Pla2g4d,Lpcat3,Pla2g4b,Pla2r1,Pla2g2a,Pla2g4a,Pla2g5,Pla2g6,Mboat1,Pla2g10,Pla2g2f,Plaat3
Branched-chain amino acid catabolism	0.927801	0.561313	Acadsb,Acad8,Aldh6a1,Mccc1,Auh,Bcat1,Bcat2,Bckdhb,Bckdk,Acat1,Mccc2,Dbt,Dld,Ppm1k,Ivd,Hibadh,Echs1,Hibch
Insulin receptor signalling cascade	0.92526	0.566689	Frs2,Pik3cb,Pik3r4,Them4,Akt2,Fgf15,Fgf2,Fgf7,Fgf9,Fgfr1,Fgfr2,Flt3l,Gab1,Grb10,Grb2,Insr,Tlr9,Irs1,Pde3b,Pdpk1,Pik3ca,Pik3r1,Pik3r2,Ptpn11,Shc1,Sos1,Irs2,Mapk1,Mapk3,Pik3c3,Trib3
Gap junction assembly	0.921813	0.572769	Tubb6,Tubb2b,Tubal3,Gja1,Gja4,Gjc1,Gjb1,Gjb2,Gjb3,Gjb4,Gjb5,Gjb6,Gjc2,Tuba1a,Tuba1b,Tuba4a,Tubb3,Tubb4b
Transcriptional Regulation by E2F6	0.919982	0.579917	Yaf2,Pcgf6,Ehmt2,Ehmt1,Bmi1,Phc3,Chek1,Phc1,Eed,Epc1,Ezh2,Rbbp7,Max,E2f6,Rbbp4,Ring1,Rnf2,Suz12,Tfdp1,Pcgf2,Rybp,Mga
Chromosome Maintenance	0.929249	0.587002	Dna2,Nop10,Cenpw,Cenpp,Cenpm,Mis18a,H4c17,Itgb3bp,Ppp6c,Gar1,Rpa3,Rpa1,Pot1a,H2aj,Ctc1,Rfc3,H4c8,Ten1,Rsf1,Pold4,Acd,Cenpu,Rfc5,Cenpn,Ankrd28,Rtel1,Rfc4,Stn1,Pif1,H2az2,Blm,Cdk2,Cenpa,Cenpc1,Daxx,H2ac18,H2ax,Dkc1,Rbbp7,Lig1,Npm1,Chtf18,Chtf8,Pcna,Pola1,Pola2,Pold1,Pold2,H2az1,Ppp6r3,Rbbp4,Rfc1,Rfc2,Cenpo,Nhp2,Wrap53,Hjurp,Cenpx,Mis18bp1,Terf1,Terf2,Wrn,Atrx,Ruvbl1,H4c11,H2ac10,H2bc11,H2bc3,H2bc21…
GABA receptor activation	0.913594	0.587002	Gng11,Gabrr3,Adcy3,Adcy4,Adcy1,Adcy6,Adcy7,Adcy8,Adcy9,Gabbr2,Gnat3,Gabra2,Gnai1,Gnai2,Gnai3,Gnal,Gnb1,Gnb2,Gnb4,Gnb5,Gng10,Gng2,Gng4,Gng5,Gngt2,Kcnj10,Kcnj16,Kcnj2,Kcnj9,Gabbr1,Adcy5,Gng13
RNA Polymerase III Transcription Initiation From Type 1 Promoter	-0.9278	0.588059	Gtf3c3,Polr2e,Polr2l,Gtf3a,Polr3k,Polr3d,Gtf3c6,Polr3g,Polr2f,Polr3gl,Gtf3c1,Gtf3c5,Polr3f,Polr3b,Gtf3c2,Gtf3c4,Polr3c,Crcp,Polr2h,Polr2k,Polr1c,Bdp1,Tbp,Polr3a,Polr3e
Fanconi Anemia Pathway	-0.921107	0.603512	Usp1,Fancl,Ube2t,Faap20,Wdr48,Rpa3,Rpa1,Fan1,Faap24,Mus81,Atrip,Faap100,Dclre1b,Slx1b,Fanci,Rps27a,Ercc1,Fanca,Fancc,Fancd2,Ercc4,Slx4,Cenpx,Uba52,Ubb,Fancg,Eme2,Fancf
Gap-filling DNA repair synthesis and ligation in GG-NER	0.899249	0.605787	Pole4,Rpa3,Rpa1,Rfc3,Pold4,Rfc5,Rfc4,Rps27a,Pcna,Pold1,Pold2,Pole,Pole2,Rfc1,Rfc2,Uba52,Ubb,Pole3,Polk
Protein-protein interactions at synapses	-0.911059	0.618227	Ppfia2,Ppfibp1,Ppfia4,Lrfn3,Ppfia1,Lrfn2,Epb41,Lrrtm2,Grm5,Slitrk6,Ppfia3,Cask,Dbnl,Dlg1,Dlg4,Epb41l2,Epb41l3,Flot1,Flot2,Grin2a,Grin2d,Il1rap,Ntrk3,Ppfibp2,Ptprd,Ptprf,Ptprs,Rtn3,Nlgn2,Dlg3,Shank3,Homer1,Homer2,Dlgap1,Lrfn4,Epb41l5,Dlgap4
Antigen activates B Cell Receptor (BCR) leading to generation of second messengers	0.8893	0.620242	Plcg2,Btk,Cd22,Grb2,Ptpn6,Cd79b,Itpr1,Itpr2,Itpr3,Blnk,Pik3ap1,Nck1,Pik3cd,Pik3r1,Sos1,Stim1,Syk,Vav1,Sh3kbp1,Dapp1
Acyl chain remodelling of PC	0.876123	0.633439	Lpcat4,Pla2g12a,Plbd1,Mboat2,Pnpla8,Tmem86b,Pla2g4c,Lpcat2,Pla2g4f,Plb1,Pla2g4d,Lpcat1,Lpcat3,Pla2g4b,Pla2r1,Pla2g2a,Pla2g4a,Pla2g5,Pla2g6,Pla2g10,Pla2g2f,Plaat3
Signaling by Type 1 Insulin-like Growth Factor 1 Receptor (IGF1R)	0.875687	0.633439	Frs2,Pik3cb,Pik3r4,Them4,Akt2,Fgf15,Fgf2,Fgf7,Fgf9,Fgfr1,Fgfr2,Flt3l,Gab1,Grb2,Igf1,Igf1r,Igf2,Tlr9,Irs1,Pde3b,Pdpk1,Pik3ca,Pik3r1,Pik3r2,Ptpn11,Shc1,Sos1,Irs2,Pik3c3,Trib3
IGF1R signaling cascade	0.875687	0.633439	Frs2,Pik3cb,Pik3r4,Them4,Akt2,Fgf15,Fgf2,Fgf7,Fgf9,Fgfr1,Fgfr2,Flt3l,Gab1,Grb2,Igf1,Igf1r,Igf2,Tlr9,Irs1,Pde3b,Pdpk1,Pik3ca,Pik3r1,Pik3r2,Ptpn11,Shc1,Sos1,Irs2,Pik3c3,Trib3
Transport of Mature Transcript to Cytoplasm	0.890813	0.644553	Sarnp,Thoc7,Magohb,Chtop,Rae1,Fip1l1,Nupl2,Srsf6,Ncbp2,Upf3b,Sympk,Ddx39a,Srsf11,U2af1l4,Thoc2,Nup35,Nup37,Fyttd1,Nup43,Zc3h11a,Nup107,Nup133,Cdc40,Nup93,Nupl1,Seh1l,Nxf7,Nup155,Nup54,Ndc1,Ncbp1,Nup98,Thoc3,Poldip3,Wdr33,Gle1,Thoc5,Pom121,Srsf9,U2af1,Tpr,Sec13,Srsf1,Eif4e,Magoh,Nxf2,Nup50,Nup62,Nup85,Cpsf2,Srrm1,Nup88,Ranbp2,Rnps1,Srsf2,Srsf3,Srsf5,Slbp,Nxf1,Ddx39b,Cpsf4,Nup153,Alyref,Cpsf3,Nup21…
HS-GAG biosynthesis	0.867108	0.649866	Slc35d2,Hs3st4,Gpc2,Ext1,Ext2,Gpc1,Gpc4,Hs3st1,Hs3st3a1,Sdc2,Hspg2,Ndst1,Ndst2,Hs6st1,Sdc1,Sdc3,Sdc4,Hs3st3b1,Gpc6,Hs2st1,Hs3st2
Glyoxylate metabolism and glycine degradation	-0.877174	0.649866	Lipt1,Lipt2,Hoga1,Gcsh,Pdhb,Ndufab1,Dlat,Grhpr,Bckdhb,Dhtkd1,Dao,Dbt,Dld,Dlst,Lias,Got2,Aldh4a1,Ogdh,Pdha1,Pdha2,Pdhx
HS-GAG degradation	0.856387	0.653687	Gpc2,Glb1l,Gusb,Glb1,Gpc1,Gpc4,Hpse,Sdc2,Hspg2,Ids,Hgsnat,Sdc1,Sdc3,Sdc4,Hpse2,Gpc6,Sgsh,Naglu
IRS-related events triggered by IGF1R	0.849254	0.656852	Frs2,Pik3cb,Pik3r4,Them4,Akt2,Fgf15,Fgf2,Fgf7,Fgf9,Fgfr1,Fgfr2,Flt3l,Gab1,Grb2,Igf1,Igf1r,Igf2,Tlr9,Irs1,Pde3b,Pdpk1,Pik3ca,Pik3r1,Pik3r2,Ptpn11,Sos1,Irs2,Pik3c3,Trib3
SUMOylation of DNA replication proteins	-0.875005	0.661928	Pias3,Rae1,Nupl2,Nup35,Nup37,Nup43,Nup107,Nup133,Nup93,Nupl1,Seh1l,Nup155,Nup54,Sumo2,Ndc1,Nup98,Pom121,Tpr,Birc5,Incenp,Nup50,Nup62,Pcna,Nup85,Nup88,Ranbp2,Rangap1,Cdca8,Sumo3,Aurkb,Nup153,Nup210,Top1,Top2a,Top2b,Ube2i,Sumo1,Pias4,Nup160,Aaas,Nup188,Nup214
Nuclear Receptor transcription pathway	0.85269	0.677205	Nr2f6,Nr2f1,Nr6a1,Nr4a1,Hnf4a,Nr4a3,Nr1i2,Nr4a2,Nrbf2,Ppara,Med1,Ppard,Pparg,Rara,Rarg,Rora,Rorc,Rxra,Rxrb,Rxrg,Nr1h4,Nr1d1,Ncor2,Thra,Nr2c1,Nr2c2,Rarb,Nr1h3,Nr1h2,Vdr,Nr0b2,Nr2e3,Nr1d2,Esrra,Nr5a1,Nr5a2,Nrbp1,Hnf4g
Regulation of TLR by endogenous ligand	-0.851218	0.688504	Gsdmd,Apob,Cd14,Cd36,Hmgb1,Lbp,Ly96,S100a1,S100a8,S100a9,Sftpd,Tlr1,Tlr4,Gsdme,Tlr2
DNA Repair	0.898273	0.699434	Dna2,Pias3,Tipin,Polr2e,Ep300,Gtf2h5,Polr2l,Cul4a,Usp1,Ccnh,Kdm4a,Pole4,Zfp830,Fancl,Ube2t,Xab2,Adprs,Polr2b,Faap20,Wdr48,H4c17,Polr2g,Pclaf,Chd1l,Rchy1,Ino80,Rpa3,Babam1,Rpa1,Fan1,Pot1a,Ppp4r2,H2aj,Faap24,Polr2d,Rfc3,H4c8,Tfpt,Pold4,Polr2f,Polr2i,Ino80b,Rnf168,Neil3,Mutyh,Ube2v2,Abraxas1,Uvssa,Nfrkb,Acd,Mus81,Topbp1,Smug1,Atrip,Mpg,Alkbh5,Faap100,Mad2l2,Ercc8,Rfc5,Cul4b,Sumo2,Neil1,Vcp,Clspn,Rfc…
Regulation of HSF1-mediated heat shock response	0.841468	0.699616	Rps19bp1,Rae1,Nupl2,Bag4,Hikeshi,Rpa3,Rpa1,Nup35,Nup37,Nup43,St13,Bag5,Nup107,Nup133,Nup93,Nupl1,Seh1l,Nup155,Nup54,Ndc1,Nup98,Hspa12a,Pom121,Tpr,Atm,Bag1,Sec13,Hspa13,Hspa5,Hspa8,Hspa1l,Hsf1,Hsph1,Hspa2,Hspa9,Dnajb1,Bag2,Mapkapk2,Hspa14,Nup50,Nup62,Hspa4l,Nup85,Nup88,Ranbp2,Nup153,Nup210,Ccar2,Ywhae,Dnajc2,Dnajc7,Gsk3b,Dnajb6,Nup160,Mapk1,Mapk3,Aaas,Sirt1,Bag3,Hspa1a,Nup188,Nup214
Nicotinate metabolism	-0.826898	0.721506	Parp4,Nmnat1,Parp6,Nudt12,Nadk2,Naxd,Nmrk2,Slc22a13,Nmnat3,Bst1,Cd38,Nadsyn1,Parp9,Parp10,Naxe,Parp16,Nnmt,Ptgis,Ptgs2,Slc5a8,Parp8,Parp14,Nt5e,Nampt,Naprt,Nadk,Nmrk1
Sulfur amino acid metabolism	0.797069	0.725764	Ethe1,Mtap,Enoph1,Mri1,Adi1,Ahcy,Mtr,Cth,Bhmt,Cdo1,Mtrr,Suox,Ado,Mpst,Tst,Txn2,Sqor,Slc25a10,Tstd1
Recognition of DNA damage by PCNA-containing replication complex	0.804398	0.731963	Cul4a,Usp1,Pole4,Wdr48,Rpa3,Rpa1,Rfc3,Pold4,Rfc5,Cul4b,Rfc4,Dtl,Rps27a,Ddb1,Pcna,Pold1,Pold2,Pole,Pole2,Rfc1,Rfc2,Uba52,Ubb,Ube2b,Rbx1,Rad18,Pole3
Nicotinamide salvaging	-0.788215	0.765314	Parp4,Parp6,Nudt12,Naxd,Slc22a13,Parp9,Parp10,Naxe,Parp16,Nnmt,Ptgis,Ptgs2,Slc5a8,Parp8,Parp14,Nampt,Naprt
IRS-mediated signalling	0.769109	0.773667	Frs2,Pik3cb,Pik3r4,Them4,Akt2,Fgf15,Fgf2,Fgf7,Fgf9,Fgfr1,Fgfr2,Flt3l,Gab1,Grb2,Tlr9,Irs1,Pde3b,Pdpk1,Pik3ca,Pik3r1,Pik3r2,Ptpn11,Sos1,Irs2,Pik3c3,Trib3
Cilium Assembly	0.823408	0.777223	Cep152,Exoc2,Haus6,Ift27,Dynlrb1,Sclt1,Nde1,Dynlt2a3,Haus3,Ift22,Tctn3,Ift172,Ift74,Tubb6,Tctn2,Dynll2,Arl13b,Akap9,Ift80,Ssna1,Tmem216,Ccp110,Mark4,B9d2,Exoc8,Dctn2,Exoc1,Cep192,Tubg1,Bbip1,Cngb1,Bbs7,Csnk1d,Haus5,Cep89,Ttc30b,Alms1,Bbs5,Exoc5,Hspb11,Atat1,Ofd1,Ttc21b,Tubb2b,Haus7,Ift140,Ift57,Traf3ip1,Nphp3,Unc119b,Cep97,Cep57,Cep72,Gbf1,Tubal3,Tnpo1,Ttbk2,Ckap5,Ttc8,Ift43,Trip11,Kif24,Haus8,If…
Caspase activation via extrinsic apoptotic signalling pathway	0.752001	0.79191	Tradd,Appl1,Ticam1,Casp3,Casp8,Casp9,Cd14,Cflar,Fadd,Fas,Ly96,Ripk1,Tlr4,Tnfrsf10b,Traf2,Tnfsf10
Anchoring of the basal body to the plasma membrane	0.782463	0.79356	Cep152,Haus6,Sclt1,Nde1,Haus3,Tctn3,Tctn2,Akap9,Ssna1,Tmem216,Ccp110,Mark4,B9d2,Dctn2,Cep192,Tubg1,Csnk1d,Haus5,Cep89,Alms1,Ofd1,Haus7,Cep97,Cep57,Cep72,Ttbk2,Ckap5,Kif24,Haus8,Clasp1,Sdccag8,Cep83,Cdk1,Dctn1,Sfi1,Dync1h1,Dync1i2,Mapre1,Hsp90aa1,C2cd3,Cep250,Rab8a,Cdk5rap2,Nedd1,Septin2,Nek2,Odf2,Pafah1b1,Pcm1,Pcnt,Prkaca,Plk1,Ppp2r1a,Prkar2b,Cep290,Rab3ip,Mks1,Fbf1,Dctn3,Plk4,Rab11a,Nphp1,Cep135…
Potassium Channels	0.746968	0.806614	Kcnb2,Gng11,Kcng4,Kcns3,Gabbr2,Gnb1,Gnb2,Gnb4,Gnb5,Gng10,Gng2,Gng4,Gng5,Gngt2,Kcnh8,Hcn1,Hcn2,Kcna1,Kcna3,Kcnab2,Kcnc3,Kcnd1,Kcnh2,Kcnj10,Kcnj16,Kcnj2,Kcnj8,Kcnj9,Kcnk1,Kcnk2,Kcnmb1,Kcnn4,Kcnq1,Kcns1,Kcnk6,Abcc8,Abcc9,Gabbr1,Kcnj1,Kcnq4,Kcnq5,Gng13
PI3K Cascade	0.743485	0.810408	Frs2,Pik3cb,Pik3r4,Them4,Akt2,Fgf15,Fgf2,Fgf7,Fgf9,Fgfr1,Fgfr2,Flt3l,Gab1,Grb2,Tlr9,Irs1,Pde3b,Pdpk1,Pik3ca,Pik3r1,Pik3r2,Ptpn11,Irs2,Pik3c3,Trib3
Sialic acid metabolism	0.731081	0.818008	Nanp,Slc17a5,Npl,Neu4,Glb1,Cmas,Neu1,Gne,Neu3,St6galnac6,Ctsa,St6gal1,St3gal3,St3gal1,St3gal4,St3gal2,St6galnac1,St6galnac2,St6galnac3,St6galnac4,St8sia2,St8sia3,St8sia4,St3gal6,Slc35a1,Nans
Dual Incision in GG-NER	0.725227	0.818696	Gtf2h5,Cul4a,Pole4,Chd1l,Rpa3,Rpa1,Rfc3,Pold4,Rfc5,Cul4b,Rfc4,Ddb2,Parp2,Gtf2h3,Rps27a,Ddb1,Ercc1,Ercc2,Ercc3,Gtf2h1,Ercc4,Pcna,Pold1,Pold2,Pole,Pole2,Rfc1,Rfc2,Uba52,Ubb,Xpa,Rbx1,Gtf2h2,Pole3,Polk
EML4 and NUDC in mitotic spindle formation	0.763772	0.819662	Cenpe,Ska2,Cenpp,Spc25,Cenpm,Dsn1,Nuf2,Pmf1,Ndc80,Mis12,Nde1,Spc24,Itgb3bp,Tubb6,Zwilch,Dynll2,Sgo2a,B9d2,Nup37,Nup43,Spdl1,Nup107,Xpo1,Dync1li2,Nup133,Dync1li1,Cenpu,Seh1l,Cenpn,Sgo1,Nup98,Tubb2b,Kif2c,Tubal3,Cdc20,Cenpf,Ckap5,Rcc2,Clasp2,Clasp1,Birc5,Kntc1,Sec13,Bub1,Bub1b,Bub3,Cenpa,Cenpc1,Eml4,Dync1h1,Dync1i2,Mapre1,Incenp,Kif2a,Mad1l1,Ndel1,Nudc,Pafah1b1,Plk1,Nup85,Ppp2r1a,Ppp1cc,Ppp2ca,Ppp2…
Regulation of TP53 Activity through Phosphorylation	0.749136	0.824084	Dna2,Taf12,Taf13,Rpa3,Rpa1,Taf11,Dyrk2,Rfc3,Taf15,Topbp1,Atrip,Tpx2,Rfc5,Taf4b,Prkaa1,Rfc4,Taf1,Rmi1,Prkaa2,Prkag2,Taf9,Atm,Blm,Nuak1,Cdk2,Cdk5,Chek1,Taf3,Rps27a,Csnk2a1,Csnk2a2,Csnk2b,Taf9b,Hipk1,Hipk2,Hus1,Kat5,Supt16,Mapkapk5,Mdm2,Mdm4,Mre11a,Chek2,Prkab1,Rad1,Rad17,Rad9a,Rfc2,Ssrp1,Stk11,Aurkb,Taf6,Tbp,Top3a,Trp53,Uba52,Ubb,Wrn,Pin1,Taf7,Taf10,Mapk14,Exo1,Nbn,Rmi2,Trp53inp1,Rbbp8,Taf5,Taf4
RET signaling	0.713096	0.829535	Frs2,Pdlim7,Pik3cb,Artn,Rap1gap,Dok1,Dok2,Gab1,Gdnf,Gfra3,Gfra4,Grb10,Grb2,Grb7,Dok4,Nrtn,Pik3ca,Pik3cd,Pik3r1,Pik3r2,Pik3r3,Prkaca,Prkacb,Prkca,Plcg1,Ptpn11,Shc1,Shc3,Sos1,Src,Mapk7,Irs2,Shank3
Carboxyterminal post-translational modifications of tubulin	-0.729261	0.829535	Ttll4,Ttll10,Tubb6,Ttll3,Ttll7,Tubb2b,Tubal3,Ttll2,Tuba1a,Tuba1b,Tuba4a,Tubb3,Ttll5,Ttll12,Tubb4b
Termination of translesion DNA synthesis	-0.728517	0.830905	Pole4,Pclaf,Rpa3,Rpa1,Rfc3,Pold4,Rfc5,Rfc4,Uba7,Rps27a,Polh,Pcna,Pold1,Pold2,Pole,Pole2,Rfc1,Rfc2,Usp43,Trim25,Uba52,Ubb,Usp10,Rev1,Ube2l6,Pole3,Poli,Polk,Isg15
Generation of second messenger molecules	0.710735	0.83575	Plcg2,Cd101,Cd3e,Cd3g,Cd247,Itk,Lat,Lck,Lcp2,Grap2,Nck1,Plcg1,Was,Fyb,Pak2
SUMOylation of RNA binding proteins	-0.722348	0.843571	Rae1,Nupl2,Nup35,Nup37,Nup43,Nup107,Nup133,Nup93,Nupl1,Seh1l,Nup155,Nup54,Sumo2,Ndc1,Nup98,Pom121,Tpr,Sec13,Bmi1,Cbx4,Phc3,Phc1,Hnrnpc,Hnrnpk,Nup50,Nup62,Nup85,Nup88,Ranbp2,Ring1,Rnf2,Nup153,Phc2,Nup210,Ube2i,Sumo1,Pcgf2,Nop58,Nup160,Aaas,Scmh1,Cbx8,Nup188,Nup214
Interferon alpha/beta signaling	-0.710875	0.843665	Ifna13,Socs3,Socs1,Ifna12,Ptpn6,Ifna4,Ifnar1,Ifnar2,Ifnb1,Irf9,Ptpn1,Ptpn11,Tyk2,Rnasel,Abce1,Usp18
Surfactant metabolism	-0.698506	0.852876	Zdhhc2,Adora2a,Adora2b,Adra2a,Adra2c,Dmbt1,Csf2ra,Ctsh,Gata6,P2ry2,Ckap4,Ccdc59,Sftpb,Sftpd,Slc34a2,Ttf1,Abca3,Adgrf5,Lmcd1
Transport of Mature mRNAs Derived from Intronless Transcripts	-0.697884	0.860342	Rae1,Fip1l1,Nupl2,Ncbp2,Sympk,Nup35,Nup37,Nup43,Nup107,Nup133,Nup93,Nupl1,Seh1l,Nup155,Nup54,Ndc1,Ncbp1,Nup98,Wdr33,Pom121,Tpr,Sec13,Eif4e,Nup50,Nup62,Nup85,Cpsf2,Nup88,Ranbp2,Slbp,Nxf1,Cpsf4,Nup153,Alyref,Cpsf3,Nup210,Nup160,Aaas,Cpsf1,Nup188,Nup214
Endogenous sterols	-0.679954	0.873562	Fdx2,Cyp4v3,Cyp27a1,Ahr,Cyp11b1,Arnt,Cyp11a1,Cyp19a1,Cyp21a1,Cyp51,Cyp7b1,Fdx1,Fdxr,Ncoa1,Ncoa2,Pomc,Ptgis,Rxra,Nr1h4,Cyp39a1
Transport of Mature mRNA Derived from an Intronless Transcript	-0.683031	0.87669	Rae1,Fip1l1,Nupl2,Ncbp2,Sympk,Nup35,Nup37,Nup43,Nup107,Nup133,Nup93,Nupl1,Seh1l,Nup155,Nup54,Ndc1,Ncbp1,Nup98,Wdr33,Pom121,Tpr,Sec13,Eif4e,Nup50,Nup62,Nup85,Cpsf2,Nup88,Ranbp2,Nxf1,Cpsf4,Nup153,Alyref,Cpsf3,Nup210,Nup160,Aaas,Cpsf1,Nup188,Nup214
Resolution of Sister Chromatid Cohesion	0.708011	0.877932	Cenpe,Ska2,Cenpp,Spc25,Cenpm,Dsn1,Nuf2,Pmf1,Ndc80,Mis12,Nde1,Spc24,Itgb3bp,Cdca5,Pds5b,Tubb6,Zwilch,Dynll2,Sgo2a,B9d2,Nup37,Nup43,Hdac8,Spdl1,Nup107,Xpo1,Dync1li2,Nup133,Dync1li1,Cenpu,Ccnb1,Seh1l,Cenpn,Sgo1,Nup98,Tubb2b,Kif2c,Tubal3,Cdc20,Cenpf,Ckap5,Rcc2,Clasp2,Clasp1,Birc5,Kntc1,Sec13,Bub1,Bub1b,Bub3,Ccnb2,Cdk1,Cenpa,Cenpc1,Smc3,Dync1h1,Dync1i2,Mapre1,Incenp,Kif2a,Mad1l1,Ndel1,Nudc,Pafah1b1,Pl…
Translesion synthesis by Y family DNA polymerases bypasses lesions on DNA template	0.65449	0.885149	Pole4,Pclaf,Rchy1,Rpa3,Rpa1,Rfc3,Pold4,Mad2l2,Rfc5,Vcp,Rfc4,Uba7,Rps27a,Sprtn,Polh,Pcna,Pold1,Pold2,Pole,Pole2,Rfc1,Rev3l,Rfc2,Usp43,Trim25,Nploc4,Uba52,Ubb,Usp10,Ufd1,Rev1,Ube2l6,Pole3,Poli,Polk,Isg15
Synthesis of bile acids and bile salts	-0.658054	0.8887	Osbpl6,Osbpl9,Hsd3b7,Cyp27a1,Osbpl3,Acot8,Osbp,Ch25h,Cyp7b1,Hsd17b4,Amacr,Ncoa1,Ncoa2,Ptgis,Rxra,Nr1h4,Scp2,Cyp39a1,Slc27a2,Slc27a5,Osbpl1a,Osbpl2
CD28 dependent PI3K/Akt signaling	-0.646416	0.899769	Them4,Prr5,Akt1,Akt2,Cd86,Rictor,Fyn,Lck,Pdpk1,Pik3ca,Pik3r1,Pik3r2,Pik3r3,Map3k14,Akt3,Mlst8,Mtor,Map3k8,Mapkap1,Trib3
SUMOylation of DNA damage response and repair proteins	-0.663887	0.905458	Eid3,Nsmce3,Rae1,Nupl2,Smc6,Nsmce1,Nsmce4a,Rpa1,Nsmce2,Nup35,Nup37,Nup43,Rnf168,Nup107,Nup133,Nup93,Nupl1,Seh1l,Nup155,Nup54,Sumo2,Ndc1,Nup98,Pom121,Tpr,Mdc1,Sec13,Blm,Bmi1,Brca1,Cbx4,Phc3,Smc3,Phc1,Herc2,Pias2,Nup50,Nup62,Pml,Nup85,Nup88,Rad21,Ranbp2,Ring1,Rnf2,Sumo3,Sp100,Stag1,Stag2,Nup153,Phc2,Tdg,Nup210,Ube2i,Sumo1,Xpc,Pcgf2,Hdac7,Pias1,Smc1a,Pias4,Nup160,Cetn2,Aaas,Smc5,Scmh1,Cbx8,Nup188,Nu…
Transport of Mature mRNA derived from an Intron-Containing Transcript	0.659411	0.90714	Sarnp,Thoc7,Magohb,Chtop,Rae1,Nupl2,Srsf6,Ncbp2,Upf3b,Ddx39a,Srsf11,U2af1l4,Thoc2,Nup35,Nup37,Fyttd1,Nup43,Zc3h11a,Nup107,Nup133,Cdc40,Nup93,Nupl1,Seh1l,Nxf7,Nup155,Nup54,Ndc1,Ncbp1,Nup98,Thoc3,Poldip3,Gle1,Thoc5,Pom121,Srsf9,U2af1,Tpr,Sec13,Srsf1,Magoh,Nxf2,Nup50,Nup62,Nup85,Srrm1,Nup88,Ranbp2,Rnps1,Srsf2,Srsf3,Srsf5,Nxf1,Ddx39b,Nup153,Alyref,Nup210,U2af2,Nxt1,Thoc6,Nup160,Aaas,Rbm8a,Casc3,Eif4a…
O-linked glycosylation	0.651397	0.907531	Adamtsl4,Galnt12,Adamtsl5,Galnt11,Spon2,Pomgnt1,Adamts17,Galnt18,Spon1,A4gnt,Adamts15,Galnt14,Gcnt3,B3gnt3,Galnt10,Muc5b,Pomk,B3gnt5,Galnt2,Galnt7,Adamts7,Adamts6,Adamts12,B3gnt6,B4gat1,Thsd4,Galnt6,Adamts1,Galnt5,Dag1,B3gntl1,Galnt1,Galnt3,Galnt4,Gcnt1,Pofut2,Large1,Adamts13,Muc13,Muc1,Cfp,Pomgnt2,Adamts2,Sema5b,St6gal1,St3gal3,St3gal1,St3gal4,St3gal2,St6galnac2,St6galnac3,St6galnac4,B3gnt2,B3gl…
DNA Damage Bypass	0.634298	0.907531	Cul4a,Usp1,Pole4,Wdr48,Pclaf,Rchy1,Rpa3,Rpa1,Rfc3,Pold4,Mad2l2,Rfc5,Cul4b,Vcp,Rfc4,Uba7,Dtl,Rps27a,Ddb1,Sprtn,Polh,Pcna,Pold1,Pold2,Pole,Pole2,Rfc1,Rev3l,Rfc2,Usp43,Trim25,Nploc4,Uba52,Ubb,Ube2b,Usp10,Ufd1,Rev1,Rbx1,Ube2l6,Rad18,Pole3,Poli,Polk,Isg15
SUMOylation of chromatin organization proteins	-0.63179	0.921353	Rae1,Nupl2,H4c17,H4c8,Nup35,Nup37,Nup43,Nup107,Nup133,Nup93,Nupl1,Seh1l,Nup155,Nup54,Sumo2,Ndc1,Hdac1,Nup98,Pom121,Tpr,Sec13,Hdac4,Bmi1,Cbx4,Phc3,Phc1,Hdac2,Satb2,Pias2,Nup50,Nup62,Nup85,Nup88,Ranbp2,Ring1,Rnf2,Suz12,Satb1,Sumo3,Nup153,Phc2,Nup210,Ube2i,Sumo1,Pcgf2,Pias1,H4c11,Nup160,Aaas,Scmh1,Cbx8,Nup188,Nup214,H4c14
Mitotic Prometaphase	0.677474	0.922229	Cenpe,Ska2,Cep152,Cenpp,Tubgcp6,Spc25,Haus6,Cenpm,Dsn1,Nuf2,Pmf1,Ndc80,Mis12,Nde1,Haus3,Spc24,Itgb3bp,Cdca5,Pds5b,Tubb6,Zwilch,Dynll2,Akap9,Ncapd2,Ssna1,Sgo2a,Ccp110,Numa1,B9d2,Tubgcp5,Dctn2,Nup37,Nup43,Smc4,Hdac8,Spdl1,Nup107,Cep192,Xpo1,Dync1li2,Tubg1,Nup133,Csnk1d,Dync1li1,Cenpu,Haus5,Mzt2,Ccnb1,Seh1l,Cenpn,Sgo1,Alms1,Nup98,Ofd1,Tubb2b,Haus7,Kif2c,Tubgcp2,Cep57,Cep72,Tubal3,Cdc20,Cenpf,Ckap5,R…
GAB1 signalosome	0.604421	0.926283	Epgn,Areg,Csk,Egfr,Ereg,Gab1,Grb2,Hbegf,Pik3ca,Pik3r1,Ptpn11,Pxn,Src,Tgfa,Pag1
Metabolism of water-soluble vitamins and cofactors	-0.646563	0.926283	Parp4,Nmnat1,Ppcdc,Pccb,Mmachc,Slc25a19,Parp6,Aasdhppt,Slc5a6,Nudt12,Lmbrd1,Mocos,Nadk2,Naxd,Mocs3,Nmrk2,Slc52a3,Slc22a13,Slc25a32,Pnpo,Coasy,Gphn,Mccc1,Pdzd11,Thtpa,Pank4,Slc25a16,Ppcs,Mthfd1l,Nmnat3,Pank2,Mtr,Acaca,Aldh1l1,Mthfs,Shmt2,Mthfd1,Mthfd2l,Pank1,Mmadhc,Mmaa,Cyb5a,Acp5,Cyb5r3,Mmab,Bst1,Cd38,Mccc2,Pcca,Hlcs,Dhfr,Nadsyn1,Mtrr,Fasn,Fpgs,Pank3,Parp9,Gsto1,Parp10,Abcc1,Naxe,Mthfd2,Mthfr,Par…
Mitotic Spindle Checkpoint	0.647905	0.926843	Cenpe,Ska2,Anapc11,Cenpp,Anapc2,Cdc26,Spc25,Cenpm,Dsn1,Nuf2,Pmf1,Ndc80,Mis12,Nde1,Spc24,Itgb3bp,Zwilch,Dynll2,Sgo2a,Ube2c,Anapc10,B9d2,Nup37,Nup43,Cdc16,Spdl1,Nup107,Xpo1,Dync1li2,Nup133,Dync1li1,Cenpu,Seh1l,Cenpn,Sgo1,Nup98,Kif2c,Cdc20,Cenpf,Anapc15,Ckap5,Rcc2,Clasp2,Clasp1,Birc5,Kntc1,Sec13,Bub1,Bub1b,Bub3,Ube2s,Cenpa,Cenpc1,Dync1h1,Dync1i2,Mapre1,Incenp,Kif2a,Mad1l1,Anapc1,Ndel1,Nudc,Pafah1b1,…
Metal ion SLC transporters	-0.58033	0.939767	Slc41a1,Slc30a5,Slc39a4,Slc39a3,Slc39a6,Slc41a2,Cp,Slc30a6,Slc39a7,Heph,Slc39a14,Slc11a1,Slc11a2,Slc31a1,Slc40a1,Slc30a1,Slc30a10,Slc39a1
Regulation of pyruvate dehydrogenase (PDH) complex	0.580585	0.943319	Pdhb,Dlat,Pdk3,Dld,Gstz1,Pdha1,Pdha2,Pdk2,Ppard,Rxra,Pdp1,Pdp2,Pdpr,Pdhx,Pdk1
Amplification of signal from the kinetochores	-0.577465	0.953136	Cenpe,Ska2,Cenpp,Spc25,Cenpm,Dsn1,Nuf2,Pmf1,Ndc80,Mis12,Nde1,Spc24,Itgb3bp,Zwilch,Dynll2,Sgo2a,B9d2,Nup37,Nup43,Spdl1,Nup107,Xpo1,Dync1li2,Nup133,Dync1li1,Cenpu,Seh1l,Cenpn,Sgo1,Nup98,Kif2c,Cdc20,Cenpf,Ckap5,Rcc2,Clasp2,Clasp1,Birc5,Kntc1,Sec13,Bub1,Bub1b,Bub3,Cenpa,Cenpc1,Dync1h1,Dync1i2,Mapre1,Incenp,Kif2a,Mad1l1,Ndel1,Nudc,Pafah1b1,Plk1,Nup85,Ppp2r1a,Ppp1cc,Ppp2ca,Ppp2cb,Ranbp2,Rangap1,Cdca8,C…
Amplification of signal from unattached kinetochores via a MAD2 inhibitory signal	-0.577465	0.953136	Cenpe,Ska2,Cenpp,Spc25,Cenpm,Dsn1,Nuf2,Pmf1,Ndc80,Mis12,Nde1,Spc24,Itgb3bp,Zwilch,Dynll2,Sgo2a,B9d2,Nup37,Nup43,Spdl1,Nup107,Xpo1,Dync1li2,Nup133,Dync1li1,Cenpu,Seh1l,Cenpn,Sgo1,Nup98,Kif2c,Cdc20,Cenpf,Ckap5,Rcc2,Clasp2,Clasp1,Birc5,Kntc1,Sec13,Bub1,Bub1b,Bub3,Cenpa,Cenpc1,Dync1h1,Dync1i2,Mapre1,Incenp,Kif2a,Mad1l1,Ndel1,Nudc,Pafah1b1,Plk1,Nup85,Ppp2r1a,Ppp1cc,Ppp2ca,Ppp2cb,Ranbp2,Rangap1,Cdca8,C…
PROBIOTICS + AMYLASE vs. PROBIOTICS
Pathway description	Normalized enrichment score	Adjusted pValue	Targets
ABC-family proteins mediated transport	2.58193	0.00181541	Psmd6,Erlec1,Psmd12,Psmd5,Psmc6,Psmd9,Eif2s2,Abcg8,Derl1,Psmd11,Psmd1,Derl3,Psme4,Vcp,Psmb11,Abcb6,Abcb8,Abcc4,Abcc3,Abcb7,Abcg1,Abcd1,Apoa1,Abcb5,Cftr,Rps27a,Abcc2,Eif2s1,Erlin2,Psmb9,Psmb8,Abcc1,Psmd7,Derl2,Abcb1a,Psma2,Psma3,Psmb1,Psmb10,Psmb4,Psmb5,Psmb6,Psmb7,Psmc1,Psmc2,Psmc3,Psmc5,Psmd4,Psme1,Psme2,Psme3,Pex19,Abcd3,Os9,Sel1l,Psmd10,Abca5,Abcc9,Rnf5,Psmd2,Psmd3,Uba52,Ubb,Abcb10,Abcb9,Pex3,…
Activated PKN1 stimulates transcription of AR (androgen receptor) regulated genes KLK2 and KLK3	3.11918	0.00181541	Kdm1a,H4c17,H2aj,H4c8,Kdm4c,H2az2,H3f3a,H3f3b,H2ac18,H2ax,Ncoa2,H2az1,H3c2,H4c11,H2ac10,H2bc11,H2bc3,H2bc21,Pkn1,H4c14,H3c1
Activation of APC/C and APC/C:Cdc20 mediated degradation of mitotic proteins	2.1194	0.0115867	Anapc11,Anapc2,Psmd6,Cdc26,Psmd12,Psmd5,Psmc6,Psmd9,Ube2c,Anapc10,Psmd11,Cdc16,Psmd1,Psme4,Ccnb1,Psmb11,Cdc20,Anapc15,Bub1b,Bub3,Ube2s,Cdk1,Rps27a,Psmb9,Psmb8,Anapc1,Psmd7,Nek2,Plk1,Psma2,Psma3,Psmb1,Psmb10,Psmb4,Psmb5,Psmb6,Psmb7,Psmc1,Psmc2,Psmc3,Psmc5,Psmd4,Psme1,Psme2,Psme3,Anapc4,Ube2d1,Cdc23,Anapc16,Psmd10,Cdc27,Psmd2,Psmd3,Uba52,Ubb,Ube2e1,Mad2l1,Anapc7,Psmc4,Psmd13,Psmd8,Anapc5,Psmd14,Psm…
Activation of ATR in response to replication stress	-2.09226	0.0026445	Rpa3,Rpa1,Rfc3,Mcm10,Atrip,Rfc5,Clspn,Rfc4,Cdc25a,Cdc25c,Cdc45,Cdc7,Cdk2,Chek1,Hus1,Mcm3,Mcm2,Mcm4,Mcm5,Mcm6,Mcm7,Orc3,Orc1,Orc2,Rad1,Rad17,Rad9a,Rfc2,Cdc6,Orc4,Orc5,Dbf4
Activation of kainate receptors upon glutamate binding	2.16064	0.021035	Gng11,Calm1,Calm2,Calm3,Dlg1,Dlg4,Gnb1,Gnb2,Gnb4,Gnb5,Gng10,Gng2,Gng4,Gng5,Gngt2,Grik3,Grik5,Plcb1,Plcb2,Plcb3,Ncald,Dlg3,Gng13
Activation of NF-kappaB in B cells	2.50825	0.00338631	Psmd6,Psmd12,Psmd5,Psmc6,Psmd9,Psmd11,Psmd1,Psme4,Fbxw11,Psmb11,Card11,Malt1,Bcl10,Rps27a,Ikbkb,Ikbkg,Psmb9,Psmb8,Psmd7,Nfkb1,Nfkbia,Nfkbib,Psma2,Psma3,Psmb1,Psmb10,Psmb4,Psmb5,Psmb6,Psmb7,Psmc1,Psmc2,Psmc3,Psmc5,Psmd4,Psme1,Psme2,Psme3,Rela,Psmd10,Skp1,Psmd2,Psmd3,Uba52,Ubb,Psmc4,Psmd13,Psmd8,Psmd14,Psma1,Psma4,Psma5,Psma6,Psma7,Psmb2,Psmb3,Cul1,Psmf1
Activation of the mRNA upon binding of the cap-binding complex and eIFs, and subsequent binding to 43S	4.96932	0.00181541	Eif3f,Rps23,Rps21,Rps10,Eif2s2,Rps20,Rps27l,Rps13,Eif3h,Rps15a,Eif3k,Rps25,Eif4b,Rps9,Eif4g1,Eif3j1,Eif2s1,Eif3a,Eif4a1,Eif4a2,Eif4e,Eif4ebp1,Eif3e,Rpsa,Rps2,Pabpc1,Rps14,Rps15,Rps16,Rps17,Rps18,Rps19,Rps24,Rps29,Rps3a1,Rps4x,Rps5,Rps6,Rps7,Rps8,Eif3g,Rps28,Eif3i,Eif4h,Eif3d,Eif3c,Rps27,Eif2s3x,Rps3,Eif3l,Rps11,Rps26,Eif3b,Eif3m
Activation of the pre-replicative complex	-1.93147	0.0101876	Pole4,Cdt1,Rpa3,Rpa1,Mcm10,Cdc45,Cdc7,Cdk2,Mcm3,Mcm2,Mcm4,Mcm5,Mcm6,Mcm7,Orc3,Orc1,Orc2,Pola1,Pola2,Pole,Pole2,Cdc6,Gmnn,Pole3,Orc4,Orc5,Dbf4
Adherens junctions interactions	2.58951	0.00385611	Actb,Actg1,Ang,Ctnna1,Ctnnb1,Ctnnd1,Cdh1,Cdh11,Cdh17,Cdh3,Cdh5,Cdh6,Jup,Afdn,Nectin2,Pvr,Nectin1,Nectin3
ADP signalling through P2Y purinoceptor 1	1.84953	0.0457451	Gng11,Gna11,Gna14,Gnaq,Gnb1,Gnb2,Gnb4,Gnb5,Gng10,Gng2,Gng4,Gng5,Gngt2,P2ry1,Pla2g4a,Src,Mapk14,Gng13
Aggrephagy	2.44454	0.00579415	Ube2v1,Tubb6,Dynll2,Arl13b,Dync1li2,Dync1li1,Tubb2b,Tubal3,Cftr,Rps27a,Dync1h1,Dync1i2,Hdac6,Pcnt,Ift88,Tuba1a,Tuba1b,Tuba4a,Tubb3,Uba52,Ubb,Vim,Dynll1,Park7,Ube2n,Tubb4b
Antigen Presentation: Folding, assembly and peptide loading of class I MHC	2.97451	0.00181541	Sar1b,Sec24b,Sec31a,Sec24d,Sec24a,B2m,Sec13,H2-Q6,Calr,Canx,Gm8909,Pdia3,Hspa5,H2-K1,H2-M3,H2-M9,H2-Q1,H2-Q10,H2-T23,H2-T24,Erap1,Sec23a,Tap1,Tap2,Tapbp,Sec24c,Bcap31,Gm11127
Antigen processing-Cross presentation	2.58454	0.00181541	Psmd6,Psmd12,Psmd5,Psmc6,Psmd9,Psmd11,Psmd1,Psme4,Psmb11,Lnpep,B2m,H2-Q6,Calr,Cd36,Gm8909,Cyba,Cybb,Fcgr1,Pdia3,H2-K1,H2-M3,H2-M9,H2-Q1,H2-Q10,H2-T23,H2-T24,Itgav,Itgb5,Psmb9,Psmb8,Psmd7,Mrc1,Mrc2,Ncf1,Ncf2,Psma2,Psma3,Psmb1,Psmb10,Psmb4,Psmb5,Psmb6,Psmb7,Psmc1,Psmc2,Psmc3,Psmc5,Psmd4,Psme1,Psme2,Psme3,Sec22b,Psmd10,Snap23,Stx4a,Tap1,Tap2,Tapbp,Psmd2,Psmd3,Vamp3,Vamp8,Psmc4,Psmd13,Psmd8,Psmd14,Ps…
Antigen processing: Ubiquitination & Proteasome degradation	1.90231	0.00472971	Ubac1,Ube2d3,Anapc11,Smurf2,Anapc2,Psmd6,Cdc26,Cul7,Ube2v1,Uba5,Rnf220,Ube2w,Lrrc41,Psmd12,Psmd5,Fbxo44,Psmc6,Ube2g1,Herc6,Psmd9,Herc4,Ufl1,Uba6,Rnf41,Ube2r2,Elob,Fbxo32,Fbxo21,Rnf115,Ube2f,Eloc,Ube3c,Rchy1,Fbxl15,Arel1,Fbxl14,Ube2c,Fbxw9,Klhl42,Trim37,Asb11,Anapc10,Anapc13,Psmd11,Ubr4,Lrr1,Fbxo7,Trim32,Cdc16,Fbxl19,Ube2q1,Psmd1,Rnf126,Ube2v2,Psme4,Fbxw11,Kctd6,Blmh,Fbxo9,Herc1,Rnf217,Cul2,Klhl5,…
Antiviral mechanism by IFN-stimulated genes	2.16324	0.0196867	Ddx58,Eif4e3,Eif4g3,Oasl1,Uba7,Eif4g1,Eif4a1,Eif4a2,Eif4e,Eif4g2,Ifit1bl2,Pde12,Mx2,Nedd4,Plcg1,Ppm1b,Eif2ak2,Trim25,Irf3,Ube2e1,Arih1,Rnasel,Abce1,Ube2l6,Usp18,Flnb,Mapk3,Eif4e2,Ube2n,Eif4a3,Isg15
APC:Cdc20 mediated degradation of cell cycle proteins prior to satisfation of the cell cycle checkpoint	2.27731	0.0063612	Anapc11,Anapc2,Psmd6,Cdc26,Psmd12,Psmd5,Psmc6,Psmd9,Ube2c,Anapc10,Psmd11,Cdc16,Psmd1,Psme4,Psmb11,Cdc20,Anapc15,Bub1b,Bub3,Ube2s,Cdk1,Rps27a,Psmb9,Psmb8,Anapc1,Psmd7,Nek2,Psma2,Psma3,Psmb1,Psmb10,Psmb4,Psmb5,Psmb6,Psmb7,Psmc1,Psmc2,Psmc3,Psmc5,Psmd4,Psme1,Psme2,Psme3,Anapc4,Ube2d1,Cdc23,Anapc16,Psmd10,Cdc27,Psmd2,Psmd3,Uba52,Ubb,Ube2e1,Mad2l1,Anapc7,Psmc4,Psmd13,Psmd8,Anapc5,Psmd14,Psma1,Psma4,Ps…
APC/C-mediated degradation of cell cycle proteins	1.85746	0.0286327	Cdc14a,Anapc11,Anapc2,Psmd6,Cdc26,Psmd12,Psmd5,Psmc6,Fbxo5,Psmd9,Ube2c,Anapc10,Psmd11,Cdc16,Psmd1,Psme4,Ccnb1,Psmb11,Cdc20,Anapc15,Bub1b,Bub3,Ube2s,Cdk1,Cdk2,Rps27a,Psmb9,Psmb8,Anapc1,Psmd7,Nek2,Plk1,Psma2,Psma3,Psmb1,Psmb10,Psmb4,Psmb5,Psmb6,Psmb7,Psmc1,Psmc2,Psmc3,Psmc5,Psmd4,Psme1,Psme2,Psme3,Anapc4,Ube2d1,Rb1,Cdc23,Anapc16,Psmd10,Cdc27,Aurkb,Psmd2,Psmd3,Uba52,Ubb,Ube2e1,Mad2l1,Anapc7,Fzr1,Psm…
APC/C:Cdc20 mediated degradation of mitotic proteins	2.16193	0.00844929	Anapc11,Anapc2,Psmd6,Cdc26,Psmd12,Psmd5,Psmc6,Psmd9,Ube2c,Anapc10,Psmd11,Cdc16,Psmd1,Psme4,Ccnb1,Psmb11,Cdc20,Anapc15,Bub1b,Bub3,Ube2s,Cdk1,Rps27a,Psmb9,Psmb8,Anapc1,Psmd7,Nek2,Psma2,Psma3,Psmb1,Psmb10,Psmb4,Psmb5,Psmb6,Psmb7,Psmc1,Psmc2,Psmc3,Psmc5,Psmd4,Psme1,Psme2,Psme3,Anapc4,Ube2d1,Cdc23,Anapc16,Psmd10,Cdc27,Psmd2,Psmd3,Uba52,Ubb,Ube2e1,Mad2l1,Anapc7,Psmc4,Psmd13,Psmd8,Anapc5,Psmd14,Psma1,Ps…
APC/C:Cdc20 mediated degradation of Securin	2.4298	0.00413536	Anapc11,Anapc2,Psmd6,Cdc26,Psmd12,Psmd5,Psmc6,Psmd9,Ube2c,Anapc10,Psmd11,Cdc16,Psmd1,Psme4,Psmb11,Cdc20,Anapc15,Ube2s,Rps27a,Psmb9,Psmb8,Anapc1,Psmd7,Psma2,Psma3,Psmb1,Psmb10,Psmb4,Psmb5,Psmb6,Psmb7,Psmc1,Psmc2,Psmc3,Psmc5,Psmd4,Psme1,Psme2,Psme3,Anapc4,Ube2d1,Cdc23,Anapc16,Psmd10,Cdc27,Psmd2,Psmd3,Uba52,Ubb,Ube2e1,Anapc7,Psmc4,Psmd13,Psmd8,Anapc5,Psmd14,Psma1,Psma4,Psma5,Psma6,Psma7,Psmb2,Psmb3,…
APC/C:Cdh1 mediated degradation of Cdc20 and other APC/C:Cdh1 targeted proteins in late mitosis/early G1	2.29217	0.0063612	Anapc11,Anapc2,Psmd6,Cdc26,Psmd12,Psmd5,Psmc6,Psmd9,Ube2c,Anapc10,Psmd11,Cdc16,Psmd1,Psme4,Psmb11,Cdc20,Anapc15,Ube2s,Rps27a,Psmb9,Psmb8,Anapc1,Psmd7,Plk1,Psma2,Psma3,Psmb1,Psmb10,Psmb4,Psmb5,Psmb6,Psmb7,Psmc1,Psmc2,Psmc3,Psmc5,Psmd4,Psme1,Psme2,Psme3,Anapc4,Ube2d1,Rb1,Cdc23,Anapc16,Psmd10,Cdc27,Aurkb,Psmd2,Psmd3,Uba52,Ubb,Ube2e1,Anapc7,Fzr1,Psmc4,Psmd13,Psmd8,Anapc5,Psmd14,Psma1,Psma4,Psma5,Psma…
Apoptosis	2.93579	0.00181541	Diablo,Oma1,Dynll2,Gsdmd,Tradd,Clspn,Appl1,Bmf,Ticam1,Dnm1l,Opa1,Aven,Dsp,Add1,Apaf1,Birc2,Xiap,Bad,Bak1,Bax,Bcl2,Bcl2l1,Bid,Bcl2l11,Bmx,Casp3,Casp6,Casp7,Casp8,Casp9,Ctnnb1,Cd14,Cdh1,Cflar,Cycs,Dbnl,Dffa,Dsg2,Fadd,Ptk2,Fas,Fnta,Gzmb,H1f3,H1f0,Hmgb1,H1f1,Kpnb1,Kpna1,Lmna,Lmnb1,Ly96,Mapt,H1f2,Nmt1,Ocln,Prkcd,Pkp1,Plec,Septin4,Ppp3cc,Ppp3r1,Ripk1,Rock1,Satb1,Ywhab,Tjp1,Tjp2,Tlr4,Tnfrsf10b,Gsdme,Tra…
Apoptotic cleavage of cellular proteins	2.65671	0.00181541	Clspn,Dsp,Add1,Birc2,Bmx,Casp3,Casp6,Casp7,Casp8,Ctnnb1,Cdh1,Dbnl,Dsg2,Ptk2,Fnta,Lmna,Lmnb1,Mapt,Ocln,Prkcd,Pkp1,Plec,Rock1,Satb1,Tjp1,Tjp2,Vim,Acin1,Stk24,Bcap31,Gsn
Apoptotic execution phase	3.16188	0.00181541	Clspn,Dnm1l,Dsp,Add1,Birc2,Bmx,Casp3,Casp6,Casp7,Casp8,Ctnnb1,Cdh1,Dbnl,Dffa,Dsg2,Ptk2,Fnta,H1f3,H1f0,Hmgb1,H1f1,Kpnb1,Kpna1,Lmna,Lmnb1,Mapt,H1f2,Ocln,Prkcd,Pkp1,Plec,Rock1,Satb1,Tjp1,Tjp2,Vim,Acin1,H1f5,Stk24,Bcap31,Gsn,Hmgb2
Apoptotic factor-mediated response	2.14889	0.0235642	Diablo,Gsdmd,Aven,Apaf1,Xiap,Bak1,Bax,Casp3,Casp7,Casp9,Cycs,Septin4,Gsdme,Apip,Mapk1,Mapk3
Asparagine N-linked glycosylation	3.29197	0.00181874	0610009B22Rik,Tmed3,Nudt14,Trappc2,Alg5,Arfgap3,Sar1b,Golga2,Tmed7,Trappc5,Alg14,Lman2,Kdelr2,Sec24b,Man1c1,Trappc6a,Tbc1d20,Nanp,Dhdds,Tmed9,Cog6,Mgat4c,Alg13,Dctn4,Stx17,Derl1,Ppp6c,Tubb6,Dynll2,Kdelr1,Dpm3,Tmed10,Chst8,Fuom,Sec31a,Cog4,Sec24d,Dctn2,Alg9,Cog7,Copb1,Lman1,Mgat4b,Dync1li2,Fcsk,Csnk1d,Fuca1,Slc17a5,Dync1li1,Mgat4a,Ankrd28,Vcp,Cnih3,Kdelr3,Tubb2b,Npl,Cog5,Gorasp1,Gbf1,Tubal3,Uap1,M…
Assembly of collagen fibrils and other multimeric structures	3.18757	0.00181541	Loxl4,Pxdn,Col6a5,Bmp1,Cd151,Col11a2,Col12a1,Col14a1,Col15a1,Col18a1,Col3a1,Col4a1,Col4a2,Col5a1,Col5a2,Col6a1,Col6a2,Col1a1,Col1a2,Ctsb,Ctsl,Ctss,Col27a1,Itga6,Lama3,Lamb3,Loxl1,Mmp13,Mmp3,Mmp9,Pcolce,Plec,Col5a3,Tll2,Loxl2,Itgb4
Assembly of the ORC complex at the origin of replication	2.73894	0.00181541	H4c17,H2aj,H4c8,H2az2,H3f3a,H3f3b,H2ac18,H2ax,Kpnb1,Kpna1,Kpna6,Orc3,Orc1,Orc2,H2az1,H3c2,H4c11,H2ac10,H2bc11,H2bc3,H2bc21,Orc4,Orc5,H4c14,H3c1
Assembly of the pre-replicative complex	2.55649	0.00181541	Psmd6,Psmd12,Psmd5,Psmc6,Psmd9,Cdt1,H4c17,H2aj,Psmd11,H4c8,Psmd1,Psme4,Psmb11,H2az2,Rps27a,E2f2,E2f3,H3f3a,H3f3b,H2ac18,H2ax,Kpnb1,Kpna1,Kpna6,Psmb9,Psmb8,Mcm3,Mcm2,Mcm4,Mcm5,Mcm6,Mcm7,Psmd7,Orc3,Orc1,Orc2,H2az1,Psma2,Psma3,Psmb1,Psmb10,Psmb4,Psmb5,Psmb6,Psmb7,Psmc1,Psmc2,Psmc3,Psmc5,Psmd4,Psme1,Psme2,Psme3,Psmd10,Psmd2,Psmd3,Uba52,Ubb,Cdc6,Psmc4,Psmd13,H3c2,H4c11,H2ac10,H2bc11,H2bc3,H2bc21,Psmd8…
Asymmetric localization of PCP proteins	2.04571	0.0186384	Smurf2,Psmd6,Psmd12,Psmd5,Psmc6,Psmd9,Psmd11,Psmd1,Psme4,Psmb11,Smurf1,Rps27a,Dvl2,Fzd1,Fzd4,Fzd5,Fzd8,Psmb9,Psmb8,Psmd7,Psma2,Psma3,Psmb1,Psmb10,Psmb4,Psmb5,Psmb6,Psmb7,Psmc1,Psmc2,Psmc3,Psmc5,Psmd4,Psme1,Psme2,Psme3,Psmd10,Psmd2,Psmd3,Uba52,Ubb,Wnt5a,Pard6a,Psmc4,Psmd13,Fzd2,Psmd8,Psmd14,Psma1,Psma4,Psma5,Psma6,Psma7,Psmb2,Psmb3,Psmf1
AUF1 (hnRNP D0) binds and destabilizes mRNA	2.70591	0.00338631	Psmd6,Psmd12,Psmd5,Psmc6,Psmd9,Psmd11,Psmd1,Psme4,Psmb11,Hnrnpd,Eif4g1,Rps27a,Hspa8,Hspb1,Psmb9,Psmb8,Psmd7,Pabpc1,Psma2,Psma3,Psmb1,Psmb10,Psmb4,Psmb5,Psmb6,Psmb7,Psmc1,Psmc2,Psmc3,Psmc5,Psmd4,Psme1,Psme2,Psme3,Psmd10,Psmd2,Psmd3,Uba52,Ubb,Psmc4,Psmd13,Psmd8,Psmd14,Psma1,Psma4,Psma5,Psma6,Psma7,Psmb2,Psmb3,Psmf1
Autodegradation of Cdh1 by Cdh1:APC/C	2.77546	0.00181541	Anapc11,Anapc2,Psmd6,Cdc26,Psmd12,Psmd5,Psmc6,Psmd9,Ube2c,Anapc10,Psmd11,Cdc16,Psmd1,Anapc15,Ube2s,Rps27a,Psmb9,Psmb8,Anapc1,Psmd7,Psma2,Psma3,Psmb1,Psmb10,Psmb4,Psmb5,Psmb6,Psmb7,Psmc1,Psmc2,Psmc3,Psmc5,Psmd4,Psme1,Psme2,Psme3,Anapc4,Ube2d1,Cdc23,Anapc16,Psmd10,Cdc27,Psmd2,Psmd3,Uba52,Ubb,Ube2e1,Anapc7,Fzr1,Psmc4,Psmd13,Psmd8,Anapc5,Psmd14,Psma1,Psma4,Psma5,Psma6,Psma7,Psmb2,Psmb3,Psmf1
Autodegradation of the E3 ubiquitin ligase COP1	2.40039	0.00472971	Psmd6,Psmd12,Psmd5,Psmc6,Psmd9,Psmd11,Psmd1,Psme4,Psmb11,Atm,Rps27a,Psmb9,Psmb8,Psmd7,Psma2,Psma3,Psmb1,Psmb10,Psmb4,Psmb5,Psmb6,Psmb7,Psmc1,Psmc2,Psmc3,Psmc5,Psmd4,Psme1,Psme2,Psme3,Psmd10,Psmd2,Trp53,Psmd3,Uba52,Ubb,Psmc4,Psmd13,Psmd8,Psmd14,Cop1,Psma1,Psma4,Psma5,Psma6,Psma7,Psmb2,Psmb3,Psmf1
Autophagy	2.55715	0.00181541	Lamtor4,Tomm6,Tomm7,Chmp4c,Lamtor1,Ube2v1,Atg4b,Chmp3,Map1lc3a,Atg10,Wdr45b,Mfn1,Map1lc3b,Atg12,Atg3,Tubb6,Tomm20,Usp30,Dynll2,Atg101,Arl13b,Rraga,Tomm5,Lamtor5,Pink1,Chmp2b,Chmp2a,Atg14,Dync1li2,Atg4d,Dync1li1,Fundc1,Slc38a9,Mfn2,Pgam5,Chmp7,Prkaa1,Tubb2b,Atg7,Mtmr3,Tubal3,Wipi2,Prkaa2,Prkag2,Chmp4b,Pik3r4,Atg4a,Chmp6,Atg16l1,Atg5,Atm,Rb1cc1,Cftr,Rps27a,Csnk2a1,Csnk2a2,Csnk2b,Uvrag,Atg4c,Dync1h1…
Axon guidance	3.36905	0.00181541	Frs2,Psenen,Actr2,Cltc,Pdlim7,Arpc5,Plxnd1,Tubb6,Arpc4,Dock1,Arhgap35,Ap2s1,Itga9,Plxnb1,Ap2b1,Usp33,Rps6ka5,Wasl,Ephb1,Tubb2b,Actr3,Tubal3,Pik3cb,Col6a5,Arpc2,Abl1,Actb,Actg1,Aph1b,Ap2a1,Ap2a2,Ap2m1,Rhoa,Rhob,Rhoc,Arpc1b,Artn,Rap1gap,Arhgef28,Cdc42,Cdk5,Rps27a,Cxcr4,Col3a1,Col4a1,Col4a2,Col5a1,Col5a2,Col6a1,Col6a2,Creb1,Crmp1,Dpysl2,Csnk2a1,Csnk2a2,Csnk2b,Dab1,Dag1,Dnm1,Dnm2,Dok1,Dok2,Efna1,Efna…
B-WICH complex positively regulates rRNA expression	2.26795	0.0086874	Polr1h,Polr2e,Ep300,Polr2l,H4c17,H2aj,H4c8,Polr2f,Taf1d,Actb,Dek,H2az2,Kat2a,H3f3a,H3f3b,H2ac18,H2ax,Polr2h,Polr2k,Myo1c,Mybbp1a,Kat2b,H2az1,Polr1c,Polr1b,Polr1a,Taf1a,Taf1b,Taf1c,Tbp,Baz1b,Ddx21,Gsk3b,H3c2,H4c11,H2ac10,H2bc11,H2bc3,H2bc21,Ercc6,Polr1f,Smarca5,H4c14,Polr1e,H3c1
Basigin interactions	2.16196	0.0235053	Ppil2,Slc7a6,Ppia,Atp1b1,Atp1b2,Atp1b3,Bsg,Cav1,Slc16a3,Itga3,Itga6,Itgb1,Slc3a2,Slc7a8,Slc16a1,Slc7a5,Slc7a7,Slc7a11,Slc7a9
Beta-catenin independent WNT signaling	2.78729	0.00181541	Gng11,Smurf2,Psmd6,Psmd12,Psmd5,Psmc6,Psmd9,Cltc,Ap2s1,Psmd11,Psmd1,Psme4,Ap2b1,Rac3,Psmb11,Cltb,Smurf1,Ap2a1,Ap2a2,Ap2m1,Rhoa,Daam1,Calm1,Calm2,Calm3,Ctnnb1,Rps27a,Dvl1,Dvl2,Dvl3,Fzd1,Fzd4,Fzd5,Fzd6,Fzd8,Gnao1,Gnb1,Gnb2,Gnb4,Gnb5,Gng10,Gng2,Gng4,Gng5,Gngt2,Kras,Lef1,Psmb9,Psmb8,Psmd7,Nlk,Pde6g,Pfn1,Prkca,Plcb1,Plcb2,Plcb3,Ppp3ca,Ppp3cb,Ppp3r1,Psma2,Psma3,Psmb1,Psmb10,Psmb4,Psmb5,Psmb6,Psmb7,Psmc…
Binding and Uptake of Ligands by Scavenger Receptors	3.2857	0.00181541	Apol11a,Apol9b,Apob,Apol8,Apol7a,Apol7c,Apoa1,Apoe,Calr,Cd36,Apol10a,Jchain,Lrp1,Marco,Msr1,Sparc,Scarb1,Hsp90b1,Apol9a,Stab2
Biological oxidations	1.93741	0.0061502	Cndp2,Cyb5b,Mgst3,Ugt1a1,Ugt1a7c,Ugt1a5,Cyp4a29,Mtarc2,Trmt112,Aadac,N6amt1,Ugt2b34,Bphl,Chac2,Fdx2,Mat2a,Gstm7,Cyp26b1,Acss1,Chac1,Sult1c2,Cyp4v3,Cmbl,Cyp2c66,Cyp27a1,Cyp2u1,Ggt6,Acy3,Cyp4f18,Cyp2c55,Aldh1b1,Ahcy,Aoc2,Cyp2s1,Cyp4f40,Mtr,Glyatl3,Cyp4a30b,Oplah,Ces2h,Mat2b,Slc35b3,Gstk1,Acy1,Maob,Cyb5r3,Adh1,Adh7,Adh5,Cbr3,Ahr,Aip,Aldh1a1,Aldh2,Aoc3,Cyp11b1,Arnt,Ggct,Akr7a5,Comt,Bpnt2,Cyp11a1,Cyp1…
C-type lectin receptors (CLRs)	2.79542	0.00181541	Psmd6,Ep300,Tab1,Ube2v1,Pycard,Psmd12,Psmd5,Psmc6,Psmd9,Tab2,Psmd11,Psmd1,Psme4,Fbxw11,Plcg2,Cd209a,Rps6ka5,Psmb11,Card11,Malt1,Raf1,Bcl10,Calm1,Calm2,Calm3,Casp8,Rps27a,Fcer1g,Fyn,Hras,Icam2,Ikbkb,Ikbkg,Il1b,Kras,Psmb9,Psmb8,Lyn,Psmd7,Nfatc2,Nfkb1,Nfkb2,Nfkbia,Pdpk1,Prkaca,Prkacb,Prkcd,Ppp3ca,Ppp3cb,Ppp3r1,Psma2,Psma3,Psmb1,Psmb10,Psmb4,Psmb5,Psmb6,Psmb7,Psmc1,Psmc2,Psmc3,Psmc5,Psmd4,Psme1,Psme2…
Ca2+ pathway	2.05571	0.0266623	Gng11,Calm1,Calm2,Calm3,Ctnnb1,Fzd4,Fzd5,Fzd6,Gnao1,Gnb1,Gnb2,Gnb4,Gnb5,Gng10,Gng2,Gng4,Gng5,Gngt2,Kras,Lef1,Nlk,Pde6g,Plcb1,Plcb2,Plcb3,Ppp3ca,Ppp3cb,Ppp3r1,Tcf7l2,Wnt11,Wnt5a,Fzd2,Map3k7,Gng13
Cap-dependent Translation Initiation	5.53621	0.00181541	Eif3f,Rpl3l,Rps23,Rps21,Rpl15,Rpl36al,Rpl35,Rpl11,Rps10,Rpl14,Rplp2,Eif2s2,Rpl37,Rps20,Rpl38,Rpl4,Rps27l,Rpl22l1,Rps13,Eif3h,Rpl39l,Rpl24,Rpl34,Rps15a,Rpl5,Rpl23a,Rpl12,Rpl13,Eif3k,Eif2b3,Rps25,Eif4b,Rpl18a,Rps9,Rplp0,Eif4g1,Rpl10,Eif2b1,Eif3j1,Eif2s1,Eif2b4,Eif3a,Eif4a1,Eif4a2,Eif4e,Eif4ebp1,Rpl31,Eif3e,Rpsa,Rps2,Pabpc1,Rpl18,Rpl19,Rpl22,Rpl26,Rpl27,Rpl28,Rpl29,Rpl37a,Rpl36a,Rpl6,Rpl7,Rpl9,Rps14…
Cargo concentration in the ER	2.18426	0.021035	Sar1b,Lman2,Sec24b,Tmed10,Sec24d,Lman1,Cnih3,Mia3,Sec24a,Areg,Cnih1,Ctsc,Preb,Lman2l,Sec22b,Sec23a,Tgfa,Sec24c,Tmed2,Stx5a,Gosr2,Mcfd2,Ctsz
Cargo recognition for clathrin-mediated endocytosis	2.24674	0.00414924	Syt11,Necap2,Ldlrap1,Cltc,Necap1,Ap2s1,Picalm,Ap2b1,Epgn,Aak1,Fcho1,Apob,Cltb,Cops8,Ston2,Arrb1,Ston1,Adrb2,Agtr1a,Ap2a1,Ap2a2,Ap2m1,Areg,Grk2,Cbl,Scarb2,Cd3g,Cftr,Rps27a,Cops2,Dab2,Dvl2,Egfr,Epn1,Epn2,Eps15,Eps15l1,Ereg,Fzd4,Chrm2,Grb2,Hbegf,Hgs,Igf2r,Il7r,Itsn1,Ldlr,M6pr,Nedd8,Reps1,Arrb2,Sh3gl2,Sh3gl1,Sh3gl3,Vamp4,Stam,Syt1,Tacr1,Tgfa,Ubqln2,Fcho2,Trf,Tfrc,Tgoln1,Uba52,Ubb,Vamp2,Vamp3,Vamp8,Wn…
Cdc20:Phospho-APC/C mediated degradation of Cyclin A	2.35244	0.00566315	Anapc11,Anapc2,Psmd6,Cdc26,Psmd12,Psmd5,Psmc6,Psmd9,Ube2c,Anapc10,Psmd11,Cdc16,Psmd1,Psme4,Psmb11,Cdc20,Anapc15,Bub1b,Bub3,Ube2s,Cdk1,Rps27a,Psmb9,Psmb8,Anapc1,Psmd7,Psma2,Psma3,Psmb1,Psmb10,Psmb4,Psmb5,Psmb6,Psmb7,Psmc1,Psmc2,Psmc3,Psmc5,Psmd4,Psme1,Psme2,Psme3,Anapc4,Ube2d1,Cdc23,Anapc16,Psmd10,Cdc27,Psmd2,Psmd3,Uba52,Ubb,Ube2e1,Mad2l1,Anapc7,Psmc4,Psmd13,Psmd8,Anapc5,Psmd14,Psma1,Psma4,Psma5,P…
CDC42 GTPase cycle	2.23867	0.00267947	Lbr,Vangl1,Arfgap3,Lamtor1,Golga2,Plekhg3,Arhgef16,Arhgap24,Steap3,Wipf2,Plekhg2,Arhgap32,Arhgap35,Arap1,Arhgef10,Arhgap17,Pak4,Arhgap45,Arhgap26,Fmnl2,Arhgap21,Cdc42ep2,Arhgap42,Cdc42ep1,Dnmbp,Cdc42se2,Scrib,Wasl,Arap3,Arhgap22,Baiap2,Dock11,Dock8,Prex2,Iqgap3,Arfgap2,Abr,Arhgdib,Bcr,Daam1,Cav1,Cdc42,Arhgap31,Arhgap10,Gmip,Ect2,Dock10,Stom,Stard13,Sh3pxd2a,Fnbp1,Srgap2,Gna13,Prex1,Itsn1,Jup,Ktn1…
CDK-mediated phosphorylation and removal of Cdc6	2.30326	0.00566315	Anapc11,Anapc2,Psmd6,Cdc26,Psmd12,Psmd5,Psmc6,Psmd9,Ube2c,Anapc10,Psmd11,Cdc16,Psmd1,Psme4,Psmb11,Anapc15,Ube2s,Ccne1,Ccne2,Cdk2,Rps27a,Psmb9,Psmb8,Anapc1,Psmd7,Psma2,Psma3,Psmb1,Psmb10,Psmb4,Psmb5,Psmb6,Psmb7,Psmc1,Psmc2,Psmc3,Psmc5,Psmd4,Psme1,Psme2,Psme3,Anapc4,Ube2d1,Cdc23,Anapc16,Psmd10,Cdc27,Psmd2,Psmd3,Uba52,Ubb,Ube2e1,Anapc7,Fzr1,Cdc6,Psmc4,Psmd13,Psmd8,Anapc5,Psmd14,Psma1,Psma4,Psma5,Psm…
Cell Cycle, Mitotic	1.44404	0.0283589	Lbr,Dna2,Cdc14a,Cenpe,Ska2,Anapc11,Cep152,Cenpp,Blzf1,Chmp4c,Anapc2,Psmd6,Tubgcp6,Cdc26,Spc25,Haus6,Cenpm,Golga2,Ccnh,Rae1,Chmp3,Dsn1,Nuf2,Pole4,Psmd12,Psmd5,Pmf1,Ndc80,Psmc6,Mis12,Fbxo5,Psmd9,Cdt1,Ctdnep1,Nupl2,Nde1,Haus3,Rcc1,H4c17,Spc24,Lin54,Itgb3bp,Cdca5,Pds5b,Tubb6,Kmt5a,Zwilch,Dynll2,Akap9,Rpa3,Rpa1,Ncapd2,Ssna1,Sgo2a,H2aj,Ube2c,Ccp110,Numa1,Chmp2b,Chmp2a,Anapc10,Psmd11,B9d2,Rfc3,H4c8,Tubg…
Cell death signalling via NRAGE, NRIF and NADE	1.83488	0.0404849	Arhgef39,Psenen,Arhgef37,Arhgef16,Itgb3bp,Plekhg2,Arhgef18,Arhgef10,Arhgef3,Arhgef40,Arhgef10l,Akap13,Arhgef17,Aph1b,Abr,Bad,Bex3,Bcl2l11,Arhgef38,Casp2,Casp3,Rps27a,Ect2,Gna13,Prex1,Itsn1,Arhgef2,Arhgef1,Arhgef15,Arhgef11,Arhgef19,Ngf,Ngfr,Sqstm1,Psen2,Rac1,Rasgrf2,Sos1,Sos2,Kalrn,Ngef,Arhgef7,Arhgef5,Traf6,Uba52,Ubb,Vav1,Vav2,Ywhae,Net1,Tiam2,Fgd2,Mapk8,Ncstn,Trio,Fgd4,Aph1a,Arhgef26
Cell junction organization	2.56354	0.00247706	Flnc,Parvb,Fblim1,Actn1,Actb,Actg1,Ang,Ctnna1,Ctnnb1,Ctnnd1,Cd151,Lims1,Cdh1,Cdh11,Cdh17,Cdh3,Cdh5,Cdh6,Ilk,Itga6,Itgb1,F11r,Jup,Krt14,Lama3,Lamb3,Afdn,Prkci,Plec,Nectin2,Pxn,Pvr,Tesk1,Vasp,Fermt2,Pard6a,Parva,Pard6b,Nectin1,Nectin3,Pard6g,Pard3,Flna,Lims2,Itgb4
Cell surface interactions at the vascular wall	3.217	0.00181541	Ppil2,Slc7a6,Cd177,Esam,Ppia,Jaml,Apob,Pik3cb,Olr1,Angpt2,Atp1b1,Atp1b2,Atp1b3,Bsg,Cav1,Cd44,Cd48,Cd84,Col1a1,Col1a2,Cxadr,Dok2,Fcer1g,Fn1,Fyn,Gas6,Gpc1,Grb2,Grb7,Ptpn6,Slc16a3,Hras,Sdc2,Jchain,Cd74,Inpp5d,Itga3,Itga4,Itga5,Itga6,Itgav,Itgax,Itgb1,Itgb2,Itgb3,Cd47,F11r,Kras,Lck,Epcam,Lyn,Slc3a2,Mertk,Mif,Cd244a,Slc7a8,Jam3,Pecam1,Pik3ca,Pik3r1,Pik3r2,Plcg1,Proc,Procr,Pros1,Ptpn11,Sirpa,Sele,Glg1,…
Cell-Cell communication	2.45538	0.00472971	Kirrel3,Flnc,Kirrel,Parvb,Wasl,Fblim1,Actn1,Actb,Actg1,Ang,Ctnna1,Ctnnb1,Ctnnd1,Cd151,Lims1,Cdh1,Cdh11,Cdh17,Cdh3,Cdh5,Cdh6,Fyn,Grb2,Ilk,Itga6,Itgb1,Cd47,F11r,Jup,Krt14,Lama3,Lamb3,Afdn,Nck1,Nck2,Prkci,Plec,Ptk2b,Sirpa,Nectin2,Pxn,Pvr,Sftpd,Gm5150,Skap2,Tesk1,Tyrobp,Vasp,Fermt2,Pard6a,Fyb,Parva,Pard6b,Nectin1,Nectin3,Pard6g,Pard3,Flna,Lims2,Itgb4,Iqgap1,Gm9733
Cell-cell junction organization	2.308	0.013111	Actb,Actg1,Ang,Ctnna1,Ctnnb1,Ctnnd1,Cdh1,Cdh11,Cdh17,Cdh3,Cdh5,Cdh6,F11r,Jup,Afdn,Prkci,Nectin2,Pvr,Pard6a,Pard6b,Nectin1,Nectin3,Pard6g,Pard3
Cell-extracellular matrix interactions	2.54916	0.00384382	Flnc,Parvb,Fblim1,Actn1,Actb,Actg1,Lims1,Ilk,Itgb1,Pxn,Tesk1,Vasp,Fermt2,Parva,Flna,Lims2
Cellular response to chemical stress	3.36804	0.00181541	Cox7b,Cox20,Cox14,Nudt2,Psmd6,Smarcd3,Psmd12,Psmd5,Psmc6,Psmd9,Cox18,Cox19,Psmd11,Blvrb,Cox11,Taco1,Psmd1,Psme4,Lrpprc,Psmb11,Chd9,Blvra,Prdx3,Prdx6,Bach1,Cox6b1,Cat,Ccs,Rps27a,Cox4i1,Cox5a,Cox6a1,Cox7c,Cox8a,Cyba,Cybb,Cycs,Fabp1,Gpx1,Gpx2,Gpx3,Gsr,Gstp1,H13,Hmox1,Hmox2,Tbl1xr1,Psmb9,Psmb8,Mafk,Abcc1,Psmd7,Nox4,Txnrd1,Ero1a,Ncf1,Ncf2,Ncoa1,Ncoa2,Fbxl17,Ndufa4,Nfe2l2,Keap1,P4hb,Prdx1,Tgs1,Ppara,Me…
Cellular response to hypoxia	2.65207	0.0025182	Ube2d3,Psmd6,Ep300,Psmd12,Psmd5,Psmc6,Psmd9,Elob,Eloc,Wtip,Psmd11,Psmd1,Psme4,Cul2,Psmb11,Arnt,Rps27a,Epas1,Egln1,Egln3,Egln2,Hif1a,Psmb9,Psmb8,Psmd7,Cited2,Psma2,Psma3,Psmb1,Psmb10,Psmb4,Psmb5,Psmb6,Psmb7,Psmc1,Psmc2,Psmc3,Psmc5,Psmd4,Psme1,Psme2,Psme3,Ube2d1,Psmd10,Hif3a,Psmd2,Psmd3,Uba52,Ubb,Vhl,Rbx1,Ube2d2a,Psmc4,Psmd13,Psmd8,Hif1an,Psmd14,Psma1,Psma4,Psma5,Psma6,Psma7,Psmb2,Psmb3,Limd1,Psmf1
Cellular responses to stimuli	3.52034	0.00204501	Sh3bp4,Lamtor4,Ube2d3,Cox7b,Atp6v1f,Anapc11,Atp6v1g2,Atp6v1g1,Atp6v1c1,Cox20,Cox14,Anapc2,Nudt2,Asf1a,Psmd6,Ep300,Cdc26,Lamtor1,Rps19bp1,Rae1,Szt2,Sesn2,Smarcd3,Psmd12,Psmd5,Psmc6,Psmd9,Nupl2,Eif2s2,Bag4,Fnip2,H4c17,Cox18,Akt1s1,Dctn4,Hikeshi,Elob,Eloc,Tubb6,Cox19,Dynll2,Hsbp1,Rpa3,Rpa1,Itfg2,Bmt2,Pot1a,Rraga,Lamtor5,H2aj,Ube2c,Wtip,Anapc10,Psmd11,Blvrb,H4c8,Nup35,Dctn2,Nup37,Cox11,Mapkapk3,Nup43…
Cellular responses to stress	3.54401	0.00203541	Sh3bp4,Lamtor4,Ube2d3,Cox7b,Atp6v1f,Anapc11,Atp6v1g2,Atp6v1g1,Atp6v1c1,Cox20,Cox14,Anapc2,Nudt2,Asf1a,Psmd6,Ep300,Cdc26,Lamtor1,Rps19bp1,Rae1,Szt2,Sesn2,Smarcd3,Psmd12,Psmd5,Psmc6,Psmd9,Nupl2,Eif2s2,Bag4,Fnip2,H4c17,Cox18,Akt1s1,Dctn4,Hikeshi,Elob,Eloc,Tubb6,Cox19,Dynll2,Hsbp1,Rpa3,Rpa1,Itfg2,Bmt2,Pot1a,Rraga,Lamtor5,H2aj,Ube2c,Wtip,Anapc10,Psmd11,Blvrb,H4c8,Nup35,Dctn2,Nup37,Cox11,Mapkapk3,Nup43…
Cellular Senescence	2.90505	0.00181541	Anapc11,Anapc2,Asf1a,Cdc26,H4c17,Pot1a,H2aj,Ube2c,Anapc10,H4c8,Mapkapk3,Cdc16,Cabin1,Acd,Ubn1,Tnik,Anapc15,Ep400,Ehmt2,Atm,H2az2,Ehmt1,Bmi1,Ube2s,Cbx4,Ccne1,Ccne2,Phc3,Cdk2,Cdk4,Cdk6,Cdkn1a,Cdkn1b,Cdkn2b,Cebpb,Rps27a,Phc1,Eed,Erf,Ezh2,Fos,H1f3,H1f0,H3f3a,H3f3b,Hira,H2ac18,H2ax,H1f1,Hmga1,Hmga2,Kat5,Rbbp7,Jun,Lmnb1,Mapkapk2,Mapkapk5,Anapc1,Mdm2,Mdm4,Mre11a,H1f2,Mink1,H2az1,Anapc4,Ube2d1,Rb1,Rbbp4,…
Chaperonin-mediated protein folding	2.61614	0.0023517	Gng11,Pdcl,Cct2,Cct3,Cct4,Cct5,Cct6a,Cct7,Cct8,Csnk2a1,Csnk2a2,Csnk2b,Gna11,Gna14,Gnaq,Gnb1,Gnb2,Gnb4,Gnb5,Gng10,Gng2,Gng4,Gng5,Gngt2,Rgs9,Tcp1,Gng13
Chemokine receptors bind chemokines	-1.7429	0.0291834	Cxcl16,Cxcr3,Cxcr4,Ccr9,Ccr4,Ccr5,Ccr8,Ccr10,Ackr3,Cx3cr1,Cxcl1,Cxcr6,Ccl21a,Ccl12,Ccl22,Ccl25,Ccl27a,Ccl4,Ccl5,Cxcl5,Cx3cl1,Cxcl12,Ccrl2,Cxcl13,Pf4,Ccl19,Ccl28,Ppbp,Cxcr1
Cholesterol biosynthesis	2.07118	0.0284501	Lbr,Msmo1,Pmvk,Arv1,Sc5d,Tm7sf2,Plpp6,Dhcr24,Fdps,Hmgcs1,Acat2,Cyp51,Dhcr7,Ebp,Fdft1,Ggps1,Hmgcr,Hsd17b7,Lss,Mvk,Nsdhl,Sqle,Idi1,Mvd
Chromatin modifying enzymes	2.38542	0.00181541	Gatad2b,Setd6,Ing5,Dpy30,Coprs,Kdm4a,Smarcd3,Riox2,Prmt6,Smarca2,Kdm1a,H4c17,Kat8,Kmt5a,Smarcc2,H2aj,Kmt5c,Kmt2e,H4c8,Kansl2,Smyd3,Setd1a,Meaf6,Nsd3,Hdac8,Wdr77,Gatad2a,Prdm16,Arid5b,Kdm3a,Setd2,Suds3,Prmt3,Brpf3,Hdac10,Jade1,Setd7,Hdac1,Msl1,Arid4a,Brms1,Hat1,Jmjd6,Nsd2,Chd4,Wdr5,Ogt,Kmt2b,Kdm5b,Arid1b,Kdm7a,Kansl1,Kdm4c,Jade2,Setd1b,Arid2,Aebp2,Dot1l,Ehmt2,Atf2,Ehmt1,Msl2,Ccnd1,Cdk4,Brpf1,Padi6…
Chromatin organization	2.38542	0.00181541	Gatad2b,Setd6,Ing5,Dpy30,Coprs,Kdm4a,Smarcd3,Riox2,Prmt6,Smarca2,Kdm1a,H4c17,Kat8,Kmt5a,Smarcc2,H2aj,Kmt5c,Kmt2e,H4c8,Kansl2,Smyd3,Setd1a,Meaf6,Nsd3,Hdac8,Wdr77,Gatad2a,Prdm16,Arid5b,Kdm3a,Setd2,Suds3,Prmt3,Brpf3,Hdac10,Jade1,Setd7,Hdac1,Msl1,Arid4a,Brms1,Hat1,Jmjd6,Nsd2,Chd4,Wdr5,Ogt,Kmt2b,Kdm5b,Arid1b,Kdm7a,Kansl1,Kdm4c,Jade2,Setd1b,Arid2,Aebp2,Dot1l,Ehmt2,Atf2,Ehmt1,Msl2,Ccnd1,Cdk4,Brpf1,Padi6…
Citric acid cycle (TCA cycle)	3.81384	0.00181541	Sdhc,Sdhd,Sdha,Sdhb,Idh3a,Fahd1,Idh3b,Idh2,Me2,Aco2,Cs,Dld,Dlst,Fh1,Idh3g,Mdh2,Ogdh,Sucla2,Suclg2,Suclg1
Class A/1 (Rhodopsin-like receptors)	-3.25496	0.00181541	Plppr4,Cxcl16,Prlh,Ece1,Lpar6,Nts,Taar3,Ffar2,Ffar1,Ffar3,P2ry6,P2ry12,Gpr37l1,P2ry13,Gpr68,Rxfp2,P2ry14,Oxgr1,Rxfp3,Nln,Gpr31b,Adora1,Adora2a,Adora2b,Adra2a,Adra2c,Adrb1,Adrb2,Agtr1a,App,Taar9,Bdkrb1,Bdkrb2,C3,C3ar1,C5ar1,Npb,Cck,Chrm1,Chrm4,Rxfp4,Cxcr3,Cxcr4,Ccr9,Ccr4,Ccr5,Ccr8,Ccr10,Ackr3,Cort,Cx3cr1,P2ry10,Opn3,S1pr3,Edn1,Edn2,Edn3,Ednra,Ednrb,F2r,F2rl1,F2rl2,Fpr2,Fpr-rs3,Fpr1,Chrm2,Gal,Gnrh1…
Class I MHC mediated antigen processing & presentation	2.25335	0.00187311	Ubac1,Ube2d3,Anapc11,Smurf2,Anapc2,Sar1b,Psmd6,Cdc26,Cul7,Ube2v1,Uba5,Rnf220,Ube2w,Lrrc41,Sec24b,Psmd12,Psmd5,Fbxo44,Psmc6,Ube2g1,Herc6,Psmd9,Herc4,Ufl1,Uba6,Rnf41,Ube2r2,Elob,Fbxo32,Fbxo21,Rnf115,Ube2f,Eloc,Ube3c,Rchy1,Fbxl15,Arel1,Fbxl14,Ube2c,Fbxw9,Klhl42,Trim37,Asb11,Anapc10,Anapc13,Psmd11,Ubr4,Sec31a,Sec24d,Lrr1,Fbxo7,Trim32,Cdc16,Fbxl19,Ube2q1,Psmd1,Rnf126,Ube2v2,Psme4,Fbxw11,Kctd6,Blmh,Fbx…
Clathrin-mediated endocytosis	3.02097	0.00181541	Syt11,Necap2,Snx9,Gapvd1,Actr2,Ldlrap1,Cltc,Necap1,Gak,Arpc5,Arpc4,Ap2s1,Picalm,Ap2b1,Epgn,Aak1,Wasl,Trip10,Fcho1,Actr3,Apob,Cltb,Rab5a,Cops8,Ston2,Arpc2,Arrb1,Actb,Actg1,Ston1,Adrb2,Agtr1a,Ap2a1,Ap2a2,Ap2m1,Areg,Arf6,Grk2,Cbl,Scarb2,Cd3g,Cftr,Rps27a,Cops2,Cttn,Dab2,Dnm1,Dnm2,Dvl2,Egfr,Epn1,Epn2,Eps15,Eps15l1,Ereg,Fnbp1,Fzd4,Chrm2,Grb2,Pacsin3,Hbegf,Hgs,Agfg1,Hspa8,Igf2r,Il7r,Itsn1,Ldlr,M6pr,Nedd…
Cleavage of the damaged purine	1.86609	0.0464237	H4c17,Pot1a,H2aj,H4c8,Neil3,Mutyh,Acd,Mpg,H2az2,H2ac18,H2ax,Ogg1,H2az1,Terf1,Terf2,H4c11,H2ac10,H2bc11,H2bc3,H2bc21,Terf2ip,H4c14
CLEC7A (Dectin-1) signaling	2.73752	0.00181541	Psmd6,Tab1,Ube2v1,Pycard,Psmd12,Psmd5,Psmc6,Psmd9,Tab2,Psmd11,Psmd1,Psme4,Fbxw11,Plcg2,Psmb11,Card11,Malt1,Bcl10,Calm1,Calm2,Calm3,Casp8,Rps27a,Ikbkb,Ikbkg,Il1b,Psmb9,Psmb8,Psmd7,Nfatc2,Nfkb1,Nfkb2,Nfkbia,Pdpk1,Prkcd,Ppp3ca,Ppp3cb,Ppp3r1,Psma2,Psma3,Psmb1,Psmb10,Psmb4,Psmb5,Psmb6,Psmb7,Psmc1,Psmc2,Psmc3,Psmc5,Psmd4,Psme1,Psme2,Psme3,Ube2d1,Cdc34,Rela,Relb,Psmd10,Src,Map3k14,Skp1,Psmd2,Traf6,Psmd3…
Collagen biosynthesis and modifying enzymes	2.66638	0.00181541	Colgalt1,Colgalt2,Col23a1,Col16a1,Col26a1,Col6a5,Pcolce2,Bmp1,Serpinh1,Col11a2,Col12a1,Col13a1,Col14a1,Col15a1,Col18a1,Col3a1,Col4a1,Col4a2,Col5a1,Col5a2,Col6a1,Col6a2,Col1a1,Col1a2,Col27a1,P3h2,P4ha1,P4ha2,P4hb,Pcolce,Plod1,Ppib,Adamts2,Col5a3,P3h1,Crtap,Tll2,Plod2,Plod3
Collagen chain trimerization	3.04029	0.00181541	Col23a1,Col16a1,Col26a1,Col6a5,Col11a2,Col12a1,Col13a1,Col14a1,Col15a1,Col18a1,Col3a1,Col4a1,Col4a2,Col5a1,Col5a2,Col6a1,Col6a2,Col1a1,Col1a2,Col27a1,Col5a3
Collagen degradation	3.24057	0.00181541	Phykpl,Col6a5,Col11a2,Col12a1,Col13a1,Col15a1,Col18a1,Col3a1,Col4a1,Col4a2,Col5a1,Col5a2,Col6a1,Col6a2,Col1a1,Col1a2,Ctsb,Ctsd,Ctsk,Ctsl,Mmp11,Mmp13,Mmp14,Mmp15,Mmp2,Mmp3,Mmp8,Mmp9,Col5a3
Collagen formation	2.83782	0.00181541	Loxl4,Pxdn,Colgalt1,Colgalt2,Col23a1,Col16a1,Col26a1,Col6a5,Pcolce2,Bmp1,Serpinh1,Cd151,Col11a2,Col12a1,Col13a1,Col14a1,Col15a1,Col18a1,Col3a1,Col4a1,Col4a2,Col5a1,Col5a2,Col6a1,Col6a2,Col1a1,Col1a2,Ctsb,Ctsl,Ctss,Col27a1,P3h2,Itga6,Lama3,Lamb3,Loxl1,Mmp13,Mmp3,Mmp9,P4ha1,P4ha2,P4hb,Pcolce,Plec,Plod1,Ppib,Adamts2,Col5a3,P3h1,Crtap,Tll2,Plod2,Plod3,Loxl2,Itgb4
Complement cascade	2.27283	0.0166059	Colec10,C7,C8b,Serping1,C1qa,C1qb,C1qc,C2,C3,C3ar1,C4b,C5ar1,Cd81,Cfh,Cfi,Clu,Crp,Fcna,Masp2,C1ra,Cfp
Complex I biogenesis	3.54949	0.00181541	Ndufb5,Ndufa3,Ndufa9,Ndufb9,Ndufb6,Ndufc1,Ndufa12,Ndufa7,Ndufb3,Tmem186,Ndufaf3,Ndufb7,Ndufa6,Ndufa13,Ndufb8,Ndufa10,Ndufb4,Ndufc2,Ndufb2,Ndufa5,Ndufb10,Ndufs3,Ndufa8,Tmem126b,Ndufaf4,Ndufaf5,Ndufaf1,Ndufab1,Ndufs5,Ndufb11,Ndufv2,Ndufaf7,Ndufs7,Ndufaf2,Timmdc1,Ndufaf6,Ndufv3,Ndufs6,Ndufa2,Ndufs4,Ndufv1,Ndufa1,Ecsit,Ndufs8,Ndufs2,Ndufs1,Acad9
Condensation of Prophase Chromosomes	1.93223	0.0450928	H4c17,Kmt5a,H2aj,H4c8,Smc4,Ccnb1,Ncapg2,H2az2,Cdk1,Ncapd3,Smc2,Mcph1,H2ac18,H2ax,Plk1,H2az1,Rb1,Ncaph2,Set,H4c11,H2ac10,H2bc11,H2bc3,H2bc21,Phf8,H4c14
Cooperation of PDCL (PhLP1) and TRiC/CCT in G-protein beta folding	2.61614	0.0023517	Gng11,Pdcl,Cct2,Cct3,Cct4,Cct5,Cct6a,Cct7,Cct8,Csnk2a1,Csnk2a2,Csnk2b,Gna11,Gna14,Gnaq,Gnb1,Gnb2,Gnb4,Gnb5,Gng10,Gng2,Gng4,Gng5,Gngt2,Rgs9,Tcp1,Gng13
COPI-dependent Golgi-to-ER retrograde traffic	2.71003	0.00181541	Cenpe,Tmed3,Arfgap3,Tmed7,Kdelr2,Use1,Tmed9,Kifc1,Tubb6,Kdelr1,Tmed10,Kif18b,Copb1,Stx18,Nbas,Kif23,Kif26b,Kdelr3,Tubb2b,Kif2c,Gbf1,Tubal3,Klc4,Napg,Napa,Rab1b,Kif20b,Arfgap2,Kif22,Arf1,Arf3,Arf4,Arf5,Copa,Kif26a,Kif15,Kif11,Kif13b,Kif16b,Kif1b,Kif1c,Kif2a,Kif21a,Kif21b,Kif3a,Kif3b,Kif3c,Kif5b,Kifap3,Arcn1,Napb,Copb2,Nsf,Rab1a,Kif20a,Sec22b,Surf4,Copg2,Copg1,Tuba1a,Tuba1b,Tuba4a,Tubb3,Tmed2,Copz2…
COPI-independent Golgi-to-ER retrograde traffic	2.85055	0.00181541	Rab3gap2,Dctn4,Tubb6,Dynll2,Dctn2,Dync1li2,Dync1li1,Tubb2b,Tubal3,Galnt2,Bicd2,Bicd1,Capza2,Capzb,Dctn1,Dync1h1,Dync1i2,Galnt1,Pafah1b1,Pafah1b2,Pafah1b3,Pla2g4a,Rab18,Rab6a,Pla2g6,Dctn3,Actr1a,Tuba1a,Tuba1b,Tuba4a,Tubb3,Dctn6,Actr10,Dynll1,Dctn5,Agpat3,Rab3gap1,Tubb4b
COPI-mediated anterograde transport	3.71274	0.00181541	Tmed3,Arfgap3,Golga2,Tmed7,Kdelr2,Tmed9,Cog6,Dctn4,Tubb6,Dynll2,Kdelr1,Tmed10,Cog4,Dctn2,Cog7,Copb1,Dync1li2,Dync1li1,Kdelr3,Tubb2b,Cog5,Gorasp1,Gbf1,Tubal3,Napg,Napa,Rab1b,Cog2,Arfgap2,Arf1,Arf3,Arf4,Arf5,Bet1,Capza2,Capzb,Copa,Dctn1,Dync1h1,Dync1i2,Cog1,Arcn1,Napb,Copb2,Nsf,Rab1a,Gosr1,Sptbn1,Dctn3,Actr1a,Copg2,Copg1,Bet1l,Tuba1a,Tuba1b,Tuba4a,Tubb3,Dctn6,Uso1,Tmed2,Copz2,Stx5a,Tmem115,Ykt6,Act…
COPII-mediated vesicle transport	2.24287	0.0074782	0610009B22Rik,Trappc2,Sar1b,Golga2,Trappc5,Lman2,Sec24b,Trappc6a,Tbc1d20,Stx17,Ppp6c,Tmed10,Sec31a,Sec24d,Lman1,Csnk1d,Ankrd28,Cnih3,Gorasp1,Napg,Napa,Rab1b,Trappc9,Scfd1,Sec24a,Areg,Bet1,Sec13,Trappc6b,Cnih1,Ctsc,Ppp6r1,Trappc1,Napb,Preb,Nsf,Lman2l,Sec22c,Ppp6r3,Rab1a,Trappc10,Sec22b,Sec23a,Tfg,Tgfa,Sec24c,Sec22a,Uso1,Tmed2,Stx5a,Ykt6,Gosr2,Sec16b,Trappc2l,Trappc3,Trappc4,Mcfd2,Sec16a,Ctsz
Cristae formation	3.47587	0.00181541	Atp5d,Atp5e,Atp5g2,Dmac2l,Atp5h,Atp5a1,Atp5b,Atp5c1,Atp5pb,Atp5g1,Atp5j,Atp5k,Atp5j2,Atp5l,Atp5o,Atp5g3
Cross-presentation of soluble exogenous antigens (endosomes)	1.95429	0.0291945	Psmd6,Psmd12,Psmd5,Psmc6,Psmd9,Psmd11,Psmd1,Psme4,Psmb11,Fcgr1,Psmb9,Psmb8,Psmd7,Mrc1,Mrc2,Psma2,Psma3,Psmb1,Psmb10,Psmb4,Psmb5,Psmb6,Psmb7,Psmc1,Psmc2,Psmc3,Psmc5,Psmd4,Psme1,Psme2,Psme3,Psmd10,Psmd2,Psmd3,Psmc4,Psmd13,Psmd8,Psmd14,Psma1,Psma4,Psma5,Psma6,Psma7,Psmb2,Psmb3,Psmf1
Cyclin A:Cdk2-associated events at S phase entry	2.34459	0.00566315	Psmd6,Ccnh,Psmd12,Psmd5,Psmc6,Psmd9,Psmd11,Psmd1,Akt1,Akt2,Ccnd1,Ccne1,Ccne2,Cdc25a,Cdc25b,Cdk2,Cdk4,Cdk7,Cdkn1a,Cdkn1b,Rps27a,Psmb9,Psmb8,Mnat1,Psmd7,Psma2,Psma3,Psmb1,Psmb10,Psmb4,Psmb5,Psmb6,Psmb7,Psmc1,Psmc2,Psmc3,Psmc5,Psmd4,Psme1,Psme2,Psme3,Rb1,Ptk6,Psmd10,Cks1b,Skp1,Psmd2,Psmd3,Uba52,Ubb,Fzr1,Akt3,Psmc4,Psmd13,Psmd8,Psmd14,Psma1,Psma4,Psma5,Psma6,Psma7,Psmb2,Psmb3,Cul1,Skp2,Cables1,Psmf1
Cyclin D associated events in G1	2.34027	0.00784093	Ccnh,E2f4,Ppp2r2a,Abl1,Ccnd1,Ccnd2,Ccnd3,Ccne1,Ccne2,Cdk2,Cdk4,Cdk6,Cdk7,Cdkn1a,Cdkn1b,Cdkn1c,Cdkn2b,Rps27a,E2f2,E2f3,E2f5,Jak2,Lyn,Mnat1,Ppp2r1a,Ppp2ca,Ppp2cb,Rb1,Rbl1,Rbl2,Ptk6,Src,Cks1b,Skp1,Tfdp1,Uba52,Ubb,Cul1,Skp2
Cyclin E associated events during G1/S transition	2.34504	0.00472971	Psmd6,Ccnh,Psmd12,Psmd5,Psmc6,Psmd9,Psmd11,Psmd1,Akt1,Akt2,Ccnd1,Ccne1,Ccne2,Cdc25a,Cdk2,Cdk4,Cdk7,Cdkn1a,Cdkn1b,Rps27a,Psmb9,Psmb8,Mnat1,Psmd7,Psma2,Psma3,Psmb1,Psmb10,Psmb4,Psmb5,Psmb6,Psmb7,Psmc1,Psmc2,Psmc3,Psmc5,Psmd4,Psme1,Psme2,Psme3,Rb1,Ptk6,Psmd10,Cks1b,Skp1,Psmd2,Psmd3,Uba52,Ubb,Akt3,Psmc4,Psmd13,Psmd8,Psmd14,Psma1,Psma4,Psma5,Psma6,Psma7,Psmb2,Psmb3,Cul1,Skp2,Cables1,Psmf1
Cytokine Signaling in Immune system	2.3034	0.00188499	Ube2d3,Ddx58,Psmd6,Tab1,Ifna13,Ube2v1,Eif4e3,Il22ra1,Psmd12,Psmd5,Eif4g3,Psmc6,Tnfrsf14,Psmd9,Peli1,Tnip2,Dusp6,Elob,Oasl1,Eloc,Ifnl2,Tab2,Vrk3,Psmd11,Gsdmd,Tnfsf13,Nkiras1,Mapkapk3,Irak4,Psmd1,Psme4,Fbxw11,Dusp7,Nkiras2,Tnfrsf13c,Dusp3,Rps6ka5,Il20ra,Psmb11,Irak3,Uba7,Il1rl2,Pik3cb,Nod1,Rapgef1,Camk2d,Cul5,Irak2,Il31,Il34,Txlna,Il33,Akt1,Akt2,Birc3,Birc2,App,Atf1,Atf2,Eif4g1,Camk2b,Camk2g,Casp1,…
Cytoprotection by HMOX1	2.98376	0.00181541	Cox7b,Cox20,Cox14,Psmd6,Smarcd3,Psmd12,Psmd5,Psmc6,Psmd9,Cox18,Cox19,Psmd11,Blvrb,Cox11,Taco1,Psmd1,Psme4,Lrpprc,Psmb11,Chd9,Blvra,Bach1,Cox6b1,Rps27a,Cox4i1,Cox5a,Cox6a1,Cox7c,Cox8a,Cycs,Fabp1,H13,Hmox1,Hmox2,Tbl1xr1,Psmb9,Psmb8,Mafk,Abcc1,Psmd7,Ncoa1,Ncoa2,Fbxl17,Ndufa4,Nfe2l2,Keap1,Tgs1,Ppara,Med1,Psma2,Psma3,Psmb1,Psmb10,Psmb4,Psmb5,Psmb6,Psmb7,Psmc1,Psmc2,Psmc3,Psmc5,Psmd4,Psme1,Psme2,Psme3,…
Cytosolic sensors of pathogen-associated DNA	2.17766	0.0191058	Ep300,Nkiras1,Trim32,Nkiras2,Dhx36,Sting1,Ddx41,Dtx4,Ctnnb1,Rps27a,Dhx9,Ikbkb,Ikbkg,Mre11a,Myd88,Nfkb1,Nfkb2,Nfkbia,Nfkbib,Rela,Stat6,Irf7,Irf3,Uba52,Ubb,Aim2,Tbk1,Trim56
DAP12 signaling	2.04533	0.0300949	Plcg2,Pik3cb,B2m,Btk,H2-Q6,Gm8909,Fyn,Grb2,H2-K1,H2-M3,H2-M9,H2-Q1,H2-Q10,H2-T23,H2-T24,Hras,Kras,Lat,Lck,Lcp2,Grap2,Pik3ca,Pik3r1,Pik3r2,Plcg1,Rac1,Shc1,Sos1,Syk,Tyrobp,Vav2,Gm11127
DDX58/IFIH1-mediated induction of interferon-alpha/beta	2.21246	0.0159382	Ddx58,Ep300,Nkiras1,Nkiras2,Nlrx1,Cyld,App,Rps27a,Hmgb1,Hsp90ab1,Hsp90aa1,Ikbkb,Ikbkg,Nfkb1,Nfkb2,Nfkbia,Nfkbib,Tax1bp1,Rela,S100b,Irf7,Irf3,Tnfaip3,Uba52,Ubb,Tbk1,Ikbke,Pin1,Tomm70a,Mavs
Deactivation of the beta-catenin transactivating complex	2.16605	0.0222392	Ctnnbip1,Chd8,Xpo1,Hdac1,Cby1,Akt1,Akt2,Xiap,Ctnnb1,Rps27a,Ctbp1,Lef1,Sox13,Sox17,Sox4,Sox6,Sox9,Tcf7,Tcf7l2,Tle1,Tle3,Tle4,Uba52,Ubb,Ywhaz
Deadenylation of mRNA	2.44364	0.00575872	Tut4,Cnot6l,Cnot3,Cnot8,Pan2,Cnot1,Cnot6,Cnot2,Pan3,Parn,Eif4b,Eif4g1,Cnot10,Eif4a1,Eif4a2,Eif4e,Tut7,Pabpc1,Cnot7,Cnot11,Cnot4,Paip1,Cnot9,Eif4a3,Tnks1bp1
Dectin-1 mediated noncanonical NF-kB signaling	2.62936	0.00338631	Psmd6,Psmd12,Psmd5,Psmc6,Psmd9,Psmd11,Psmd1,Psme4,Fbxw11,Psmb11,Rps27a,Psmb9,Psmb8,Psmd7,Nfkb2,Psma2,Psma3,Psmb1,Psmb10,Psmb4,Psmb5,Psmb6,Psmb7,Psmc1,Psmc2,Psmc3,Psmc5,Psmd4,Psme1,Psme2,Psme3,Relb,Psmd10,Map3k14,Skp1,Psmd2,Psmd3,Uba52,Ubb,Ube2m,Uba3,Psmc4,Psmd13,Psmd8,Psmd14,Psma1,Psma4,Psma5,Psma6,Psma7,Psmb2,Psmb3,Cul1,Psmf1
Degradation of AXIN	2.32228	0.00685538	Smurf2,Psmd6,Psmd12,Psmd5,Psmc6,Psmd9,Rnf146,Psmd11,Psmd1,Psme4,Psmb11,Tnks2,Axin1,Axin2,Rps27a,Psmb9,Psmb8,Psmd7,Psma2,Psma3,Psmb1,Psmb10,Psmb4,Psmb5,Psmb6,Psmb7,Psmc1,Psmc2,Psmc3,Psmc5,Psmd4,Psme1,Psme2,Psme3,Psmd10,Psmd2,Tnks,Psmd3,Uba52,Ubb,Psmc4,Psmd13,Psmd8,Psmd14,Psma1,Psma4,Psma5,Psma6,Psma7,Psmb2,Psmb3,Psmf1
Degradation of beta-catenin by the destruction complex	2.34247	0.00566315	Psmd6,Psmd12,Psmd5,Psmc6,Psmd9,Psmd11,Psmd1,Psme4,Amer1,Psmb11,Axin1,Ctnnb1,Rps27a,Ctbp1,Ctbp2,Frat1,Frat2,Lef1,Psmb9,Psmb8,Psmd7,Ppp2r1a,Ppp2ca,Ppp2cb,Psma2,Psma3,Psmb1,Psmb10,Psmb4,Psmb5,Psmb6,Psmb7,Psmc1,Psmc2,Psmc3,Psmc5,Psmd4,Psme1,Psme2,Psme3,Psmd10,Skp1,Tcf7,Tcf7l2,Psmd2,Tle1,Tle3,Tle4,Psmd3,Uba52,Ubb,Rbx1,Gsk3b,Psmc4,Psmd13,Psmd8,Psmd14,Psma1,Psma4,Psma5,Psma6,Psma7,Psmb2,Psmb3,Ppp2r5c,Pp…
Degradation of DVL	2.34153	0.00685538	Psmd6,Psmd12,Psmd5,Psmc6,Psmd9,Psmd11,Psmd1,Psme4,Psmb11,Klhl12,Rps27a,Dvl1,Dvl2,Dvl3,Psmb9,Psmb8,Psmd7,Psma2,Psma3,Psmb1,Psmb10,Psmb4,Psmb5,Psmb6,Psmb7,Psmc1,Psmc2,Psmc3,Psmc5,Psmd4,Psme1,Psme2,Psme3,Psmd10,Psmd2,Psmd3,Uba52,Ubb,Rbx1,Psmc4,Psmd13,Psmd8,Psmd14,Psma1,Psma4,Psma5,Psma6,Psma7,Psmb2,Psmb3,Cul3,Psmf1
Degradation of GLI1 by the proteasome	2.59113	0.00338631	Psmd6,Psmd12,Psmd5,Psmc6,Psmd9,Psmd11,Psmd1,Psme4,Psmb11,Rps27a,Gli1,Itch,Psmb9,Psmb8,Psmd7,Numb,Psma2,Psma3,Psmb1,Psmb10,Psmb4,Psmb5,Psmb6,Psmb7,Psmc1,Psmc2,Psmc3,Psmc5,Psmd4,Psme1,Psme2,Psme3,Psmd10,Skp1,Psmd2,Psmd3,Uba52,Ubb,Rbx1,Psmc4,Psmd13,Sufu,Psmd8,Psmd14,Psma1,Psma4,Psma5,Psma6,Psma7,Psmb2,Psmb3,Cul1,Psmf1
Degradation of the extracellular matrix	3.34972	0.00181541	Ctrb1,Capn11,Optc,Spock3,Phykpl,Capn9,Col6a5,Mmp25,Adam10,Adam15,Adam8,Bmp1,Bsg,Capn1,Capn2,Capns1,Capn5,Capn7,Cast,Cd44,Cdh1,Col11a2,Col12a1,Col13a1,Col15a1,Col18a1,Col3a1,Col4a1,Col4a2,Col5a1,Col5a2,Col6a1,Col6a2,Col1a1,Col1a2,Ctsb,Ctsd,Ctsk,Ctsl,Ctss,Dcn,Eln,Fbn1,Fn1,Hspg2,Klk1b26,Lama3,Lamb3,Cma1,Mmp11,Mmp13,Mmp14,Mmp15,Mmp16,Mmp2,Mmp3,Mmp8,Mmp9,Capn15,Nid1,Furin,Capn13,Col5a3,Htra1,Adamts5,C…
Depurination	1.86609	0.0464237	H4c17,Pot1a,H2aj,H4c8,Neil3,Mutyh,Acd,Mpg,H2az2,H2ac18,H2ax,Ogg1,H2az1,Terf1,Terf2,H4c11,H2ac10,H2bc11,H2bc3,H2bc21,Terf2ip,H4c14
Detoxification of Reactive Oxygen Species	2.93866	0.00181541	Nudt2,Prdx3,Prdx6,Cat,Ccs,Cyba,Cybb,Cycs,Gpx1,Gpx2,Gpx3,Gsr,Gstp1,Nox4,Txnrd1,Ero1a,Ncf1,Ncf2,P4hb,Prdx1,Sod1,Sod2,Sod3,Prdx2,Prdx5,Txn1,Txn2,Txnrd2
Deubiquitination	2.12797	0.00181541	Josd2,Ddx58,Smurf2,Psmd6,Ep300,Tab1,Rnf128,Psmd12,Psmd5,Psmc6,Psmd9,Tnip2,Tada2b,Wdr48,Usp24,Tomm20,Usp30,Rnf146,Ino80,Otub2,Babam1,Mul1,Tada3,H2aj,Ccp110,Foxk2,Psmd11,Wdr20,Tfpt,Ino80b,Psmd1,Stambp,Vcpip1,Abraxas1,Psme4,Nfrkb,Usp19,Usp28,Ifih1,Usp3,Bap1,Suds3,Usp48,Usp33,Vcp,Clspn,Otud3,Psmb11,Usp16,Josd1,Cyld,Tnks2,Otub1,Nod1,Usp47,Babam2,Ddb2,Cdc20,Asxl2,Ogt,Mat2b,Mbd5,Abraxas2,Stambpl1,Usp42,…
Developmental Biology	2.88871	0.00187286	Frs2,Lce1g,Psenen,Krtap3-2,Actr2,Krt20,Cltc,Pdlim7,Pkp2,Arpc5,Plxnd1,Gm11562,Tubb6,Arpc4,Dock1,1110025L11Rik,Klk5,Lce1b,Arhgap35,Ap2s1,Lipn,Spag9,Itga9,Krtap16-3,Kazn,Krtap16-1,Plxnb1,Ap2b1,Gm11568,Usp33,Krtap1-4,Rps6ka5,Wasl,Ephb1,Tubb2b,Actr3,Krt80,Tubal3,Pik3cb,Col6a5,Arpc2,Dsp,Abl1,Actb,Actg1,Adam11,Aph1b,Gm7138,Akt1,Akt2,Ap2a1,Ap2a2,Ap2m1,Rhoa,Rhob,Rhoc,Arpc1b,Artn,Gm7137,Krt7,Rap1gap,Bnip2,…
Digestion and absorption	2.87004	0.00181541	Lipf,Mgam,Pir,Sis,Rsc1a1,Alpi,Clps,Cel,Guca2a,Guca2b,Gucy2c,Pnliprp1,Pnliprp2,Slc2a2,Slc5a1,Slc2a5,Lct
DNA Damage Recognition in GG-NER	1.99517	0.0331747	Cul4a,Ino80,Tfpt,Ino80b,Nfrkb,Cul4b,Ddb2,Cops8,Actb,Parp2,Rps27a,Cops2,Ddb1,Mcrs1,Rad23a,Rad23b,Uba52,Ubb,Xpc,Yy1,Actr8,Rbx1,Actl6a,Ruvbl1,Cetn2,Cops3,Cops5,Cops4,Cops6,Cops7a,Cops7b,Ino80c,Ino80d
DNA Damage/Telomere Stress Induced Senescence	2.38865	0.00466527	Asf1a,H4c17,Pot1a,H2aj,H4c8,Cabin1,Acd,Ubn1,Ep400,Atm,H2az2,Ccne1,Ccne2,Cdk2,Cdkn1a,Cdkn1b,H1f3,H1f0,Hira,H2ac18,H2ax,H1f1,Hmga1,Hmga2,Kat5,Lmnb1,Mre11a,H1f2,H2az1,Rb1,Terf1,Terf2,Trp53,H1f5,H4c11,H2ac10,H2bc11,H2bc3,H2bc21,Terf2ip,Nbn,H4c14
DNA Double Strand Break Response	2.01071	0.026478	Kdm4a,H4c17,Babam1,H4c8,Rnf168,Ube2v2,Abraxas1,Nsd2,Babam2,Mdc1,Abl1,Apbb1,Atm,Rps27a,Eya3,Brcc3,Herc2,H2ax,Kat5,Kpna2,Mre11a,Chek2,Ppp5c,Uimc1,Trp53,Uba52,Ubb,Ube2i,Sumo1,Baz1b,H4c11,H2bc11,H2bc3,H2bc21,Rnf8,Pias4,Mapk8,Trp53bp1,Nbn,Smarca5,Ube2n,Kdm4b,H4c14
DNA Replication	1.76611	0.0246739	Dna2,Anapc11,Anapc2,Psmd6,Cdc26,Pole4,Psmd12,Psmd5,Psmc6,Psmd9,Cdt1,H4c17,Rpa3,Rpa1,H2aj,Ube2c,Anapc10,Psmd11,Rfc3,H4c8,Pold4,Cdc16,Mcm10,Psmd1,Psme4,Rfc5,Rfc4,Psmb11,Anapc15,Gins2,Gins4,H2az2,Ube2s,Ccne1,Ccne2,Cdc45,Cdc7,Cdk2,Rps27a,E2f2,E2f3,H3f3a,H3f3b,H2ac18,H2ax,Kpnb1,Kpna1,Kpna6,Lig1,Psmb9,Psmb8,Mcm3,Mcm2,Mcm4,Mcm5,Mcm6,Mcm7,Anapc1,Psmd7,Orc3,Orc1,Orc2,Pcna,Pola1,Pola2,Pold1,Pold2,Pole,Pole…
DNA Replication Pre-Initiation	2.12316	0.00583132	Psmd6,Pole4,Psmd12,Psmd5,Psmc6,Psmd9,Cdt1,H4c17,Rpa3,Rpa1,H2aj,Psmd11,H4c8,Mcm10,Psmd1,Psme4,Psmb11,H2az2,Cdc45,Cdc7,Cdk2,Rps27a,E2f2,E2f3,H3f3a,H3f3b,H2ac18,H2ax,Kpnb1,Kpna1,Kpna6,Psmb9,Psmb8,Mcm3,Mcm2,Mcm4,Mcm5,Mcm6,Mcm7,Psmd7,Orc3,Orc1,Orc2,Pola1,Pola2,Pole,Pole2,H2az1,Psma2,Psma3,Psmb1,Psmb10,Psmb4,Psmb5,Psmb6,Psmb7,Psmc1,Psmc2,Psmc3,Psmc5,Psmd4,Psme1,Psme2,Psme3,Psmd10,Psmd2,Psmd3,Uba52,Ubb,…
Dopamine Neurotransmitter Release Cycle	-1.7514	0.0319567	Ppfia2,Ppfia4,Ppfia1,Lin7a,Tspoap1,Ppfia3,Cask,Slc18a2,Rab3a,Stx1a,Stxbp1,Syt1,Unc13b,Vamp2,Lin7b,Lin7c,Apba1
Downregulation of ERBB2 signaling	2.02263	0.0316515	Rnf41,Cul5,Akt1,Akt2,Cdc37,Rps27a,Egfr,Erbb2,Erbb3,Ereg,Hbegf,Hsp90aa1,Matk,Usp8,Ptpn12,Ptpn18,Uba52,Ubb,Stub1,Akt3,Erbin
Downregulation of SMAD2/3:SMAD4 transcriptional activity	2.03668	0.0309074	Ube2d3,Smurf2,Snw1,Hdac1,Rps27a,Smad2,Smad3,Smad4,Ppm1a,Ube2d1,Skil,Ncor2,Tgif1,Uba52,Ubb,Usp9x,Trim33,Tgif2
Downstream signaling events of B Cell Receptor (BCR)	2.71628	0.00181541	Psmd6,Psmd12,Psmd5,Psmc6,Psmd9,Psmd11,Psmd1,Psme4,Fbxw11,Psmb11,Card11,Rasgrp3,Malt1,Bcl10,Calm1,Calm2,Calm3,Rps27a,Fkbp1a,Hras,Ikbkb,Ikbkg,Kras,Psmb9,Psmb8,Psmd7,Nfatc2,Nfkb1,Nfkbia,Nfkbib,Ppp3ca,Ppp3cb,Ppp3r1,Psma2,Psma3,Psmb1,Psmb10,Psmb4,Psmb5,Psmb6,Psmb7,Psmc1,Psmc2,Psmc3,Psmc5,Psmd4,Psme1,Psme2,Psme3,Rela,Psmd10,Skp1,Psmd2,Psmd3,Uba52,Ubb,Psmc4,Psmd13,Psmd8,Psmd14,Psma1,Psma4,Psma5,Psma6,Ps…
Downstream TCR signaling	2.16772	0.0104546	Psmd6,Ube2v1,Psmd12,Psmd5,Psmc6,Psmd9,Tab2,Psmd11,Psmd1,Psme4,Fbxw11,Psmb11,Pik3cb,Card11,Malt1,Bcl10,Cd3e,Cd3g,Cd247,Rps27a,Ikbkb,Ikbkg,Inpp5d,Lck,Psmb9,Psmb8,Psmd7,Nfkb1,Nfkbia,Pdpk1,Pik3ca,Pik3r1,Pik3r2,Psma2,Psma3,Psmb1,Psmb10,Psmb4,Psmb5,Psmb6,Psmb7,Psmc1,Psmc2,Psmc3,Psmc5,Psmd4,Psme1,Psme2,Psme3,Pten,Ube2d1,Cdc34,Rela,Psmd10,Skp1,Psmd2,Traf6,Psmd3,Uba52,Ubb,Ube2d2a,Psmc4,Psmd13,Psmd8,Psmd14…
ECM proteoglycans	3.39858	0.00181541	Itga9,Col6a5,App,Itga8,Bgn,Col3a1,Col5a1,Col5a2,Col6a1,Col6a2,Col1a1,Col1a2,Hapln1,Dag1,Dcn,Fn1,Hspg2,Tnxb,Itga2,Itga2b,Itgav,Itgax,Itgb1,Itgb3,Itgb5,Itgb6,Matn3,Matn4,Sparc,Col5a3,Tnc
Elastic fibre formation	2.33056	0.00947296	Mfap1a,Loxl4,Emilin1,Ltbp1,Ltbp4,Mfap4,Itga8,Bmp2,Bmp4,Bmp7,Eln,Fbln2,Fbn1,Fn1,Itga5,Itgav,Itgb1,Itgb3,Itgb5,Itgb6,Loxl1,Ltbp2,Ltbp3,Mfap2,Emilin2,Mfap5,Furin,Mfap3,Tgfb1,Fbln5,Efemp2,Loxl2
Endosomal Sorting Complex Required For Transport (ESCRT)	2.26803	0.0128588	Vta1,Chmp4c,Chmp3,Vps28,Ubap1,Vps37b,Chmp2b,Chmp2a,Vps36,Mvb12b,Chmp7,Mvb12a,Vps37c,Chmp4b,Chmp5,Chmp6,Rps27a,Hgs,Vps4a,Vps37a,Vps4b,Stam,Tsg101,Uba52,Ubb,Stam2,Snf8,Vps25
EPH-Ephrin signaling	2.77488	0.00248815	Psenen,Actr2,Arpc5,Arpc4,Wasl,Ephb1,Actr3,Arpc2,Actb,Actg1,Aph1b,Rhoa,Arpc1b,Arhgef28,Cdc42,Efna1,Efna4,Efnb1,Efnb2,Efnb3,Epha1,Epha2,Epha4,Ephb2,Ephb3,Ephb4,Ptk2,Fyn,Hras,Sdc2,Itsn1,Lyn,Mmp2,Mmp9,Nck2,Psen2,Rac1,Rock1,Rock2,Git1,Sdcbp,Src,Kalrn,Ngef,Arhgef7,Rasa1,Vav2,Yes1,Arpc3,Arpc1a,Ncstn,Pak2,Aph1a
EPHB-mediated forward signaling	2.86778	0.00181541	Actr2,Arpc5,Arpc4,Wasl,Ephb1,Actr3,Arpc2,Actb,Actg1,Rhoa,Arpc1b,Arhgef28,Cdc42,Efnb1,Efnb2,Efnb3,Ephb2,Ephb3,Ephb4,Ptk2,Fyn,Hras,Sdc2,Itsn1,Lyn,Rac1,Rock1,Rock2,Src,Kalrn,Rasa1,Yes1,Arpc3,Arpc1a
Epigenetic regulation of gene expression	2.1169	0.0113057	Polr1h,Polr2e,Ep300,Polr2l,H4c17,H2aj,H4c8,Polr2f,Taf1d,Actb,Aebp2,Dek,H2az2,Dnmt1,Dnmt3a,Eed,Ezh2,Kat2a,H3f3a,H3f3b,H2ac18,H2ax,Rbbp7,Polr2h,Jarid2,Mbd2,Polr2k,Mtf2,Myo1c,Mybbp1a,Kat2b,H2az1,Rbbp4,Suz12,Polr1c,Polr1b,Polr1a,Suv39h1,Taf1a,Taf1b,Taf1c,Tbp,Phf1,Tdg,Baz1b,Ddx21,Gsk3b,H3c2,H4c11,H2ac10,H2bc11,H2bc3,H2bc21,Ercc6,Polr1f,Sirt1,Smarca5,H4c14,Polr1e,H3c1
ER to Golgi Anterograde Transport	3.44099	0.00181541	0610009B22Rik,Tmed3,Trappc2,Arfgap3,Sar1b,Golga2,Tmed7,Trappc5,Lman2,Kdelr2,Sec24b,Trappc6a,Tbc1d20,Tmed9,Cog6,Dctn4,Stx17,Ppp6c,Tubb6,Dynll2,Kdelr1,Tmed10,Sec31a,Cog4,Sec24d,Dctn2,Cog7,Copb1,Lman1,Dync1li2,Csnk1d,Dync1li1,Ankrd28,Cnih3,Kdelr3,Tubb2b,Cog5,Gorasp1,Gbf1,Tubal3,Napg,Napa,Mia3,Rab1b,Cog2,Trappc9,Scfd1,Arfgap2,Sec24a,Areg,Arf1,Arf3,Arf4,Arf5,Bet1,Sec13,Capza2,Capzb,Trappc6b,Cnih1,Copa…
ER-Phagosome pathway	2.52657	0.00385611	B2m,H2-Q6,Calr,Gm8909,Pdia3,H2-K1,H2-M3,H2-M9,H2-Q1,H2-Q10,H2-T23,H2-T24,Sec22b,Snap23,Stx4a,Tap1,Tap2,Tapbp,Vamp3,Vamp8,Gm11127
ESR-mediated signaling	2.74259	0.00181541	Gng11,Polr2e,Ep300,Polr2l,Kdm1a,Polr2b,H4c17,Polr2g,Ppid,Zdhhc21,H2aj,Gtf2f2,Polr2d,H4c8,Zdhhc7,Polr2f,Polr2i,Xpo1,Gtf2a2,Epgn,Nrip1,Strn,Hdac1,Cdk9,Akt1,Akt2,Areg,Atf2,H2az2,Calm1,Calm2,Calm3,Cav1,Cbfb,Ccnt1,Cdkn1b,Creb1,Gnat3,S1pr3,Egfr,Ereg,Ptk2,Fkbp4,Fkbp5,Fos,Gata3,Gnai1,Gnai2,Gnai3,Gnb1,Gnb2,Gnb4,Gnb5,Gng10,Gng2,Gng4,Gng5,Gngt2,H3f3a,H3f3b,Hbegf,H2ac18,H2ax,Foxa1,Hras,Prmt1,Hspb1,Hsp90ab1,H…
Estrogen-dependent gene expression	2.63539	0.00340264	Polr2e,Ep300,Polr2l,Kdm1a,Polr2b,H4c17,Polr2g,H2aj,Gtf2f2,Polr2d,H4c8,Polr2f,Polr2i,Gtf2a2,Nrip1,Hdac1,Cdk9,Atf2,H2az2,Cbfb,Ccnt1,Fkbp4,Fos,Gata3,H3f3a,H3f3b,H2ac18,H2ax,Foxa1,Prmt1,Hsp90ab1,Hsp90aa1,Kat5,Polr2h,Jun,Polr2k,Myc,Ncoa1,Ncoa2,Gtf2a1,Kat2b,Pou2f1,Med1,H2az1,Polr2a,Polr2c,Sp1,Tbp,Tle3,Usf2,Yy1,Ptges3,H3c2,H4c11,H2ac10,H2bc11,H2bc3,H2bc21,Carm1,Nr5a2,Kdm4b,H4c14,Zfp217,H3c1,Gtf2f1
Eukaryotic Translation Initiation	5.53621	0.00181541	Eif3f,Rpl3l,Rps23,Rps21,Rpl15,Rpl36al,Rpl35,Rpl11,Rps10,Rpl14,Rplp2,Eif2s2,Rpl37,Rps20,Rpl38,Rpl4,Rps27l,Rpl22l1,Rps13,Eif3h,Rpl39l,Rpl24,Rpl34,Rps15a,Rpl5,Rpl23a,Rpl12,Rpl13,Eif3k,Eif2b3,Rps25,Eif4b,Rpl18a,Rps9,Rplp0,Eif4g1,Rpl10,Eif2b1,Eif3j1,Eif2s1,Eif2b4,Eif3a,Eif4a1,Eif4a2,Eif4e,Eif4ebp1,Rpl31,Eif3e,Rpsa,Rps2,Pabpc1,Rpl18,Rpl19,Rpl22,Rpl26,Rpl27,Rpl28,Rpl29,Rpl37a,Rpl36a,Rpl6,Rpl7,Rpl9,Rps14…
Extra-nuclear estrogen signaling	2.13824	0.0112587	Gng11,Zdhhc21,Zdhhc7,Xpo1,Epgn,Strn,Akt1,Akt2,Areg,Calm1,Calm2,Calm3,Cav1,Cdkn1b,Creb1,Gnat3,S1pr3,Egfr,Ereg,Ptk2,Gnai1,Gnai2,Gnai3,Gnb1,Gnb2,Gnb4,Gnb5,Gng10,Gng2,Gng4,Gng5,Gngt2,Hbegf,Hras,Prmt1,Hspb1,Hsp90aa1,Igf1r,Uhmk1,Kras,Mmp2,Mmp3,Mmp9,Nos3,Pdpk1,Pik3ca,Pik3r1,Pik3r2,Pik3r3,Prkcz,Shc1,Src,Tgfa,Foxo3,Akt3,Mapk1,Gng13
Extracellular matrix organization	3.15788	0.00181541	Ctrb1,Mfap1a,Loxl4,Emilin1,Pxdn,Colgalt1,Itga9,Capn11,Ltbp1,Optc,Colgalt2,Spock3,Phykpl,Capn9,Col23a1,Col16a1,Col26a1,Col6a5,Ltbp4,Mmp25,Mfap4,Pcolce2,Itga1,Adam10,Adam12,Adam15,Adam19,Adam8,App,Itga8,Bgn,Bmp1,Bmp2,Bmp4,Bmp7,Bsg,Ddr1,Capn1,Capn2,Capns1,Capn5,Capn7,Cast,Serpinh1,Cd151,Cd44,Cdh1,Col11a2,Col12a1,Col13a1,Col14a1,Col15a1,Col18a1,Col3a1,Col4a1,Col4a2,Col5a1,Col5a2,Col6a1,Col6a2,Col1a1,…
Factors involved in megakaryocyte development and platelet production	2.12512	0.00579415	Cenpe,Kdm1a,Mfn1,Kifc1,Tubb6,Dock1,Carmil1,Dock5,Kif18b,Kif23,Mfn2,Kif26b,Hdac1,Tubb2b,Kif2c,Tubal3,Klc4,Rab5a,Dock11,Jmjd1c,Dock8,Kif20b,Akap1,Kif22,Capza2,Capzb,Cbx5,Cdc42,Rbsn,Kif26a,Kif15,Ehd1,Dock10,Gata3,Gata4,Gata5,Gata6,H3f3a,H3f3b,Hdac2,Hmg20b,Jak2,Kif11,Kif13b,Kif16b,Kif1b,Kif1c,Kif2a,Kif21a,Kif21b,Kif3a,Kif3b,Kif3c,Kif5b,Kifap3,Sh2b3,Maff,Mafg,Mafk,Prkaca,Prkacb,Prkar1a,Prkar1b,Prkar2b…
Fatty acid metabolism	2.68839	0.00181541	Hacd4,Cyp4a29,Acot13,Pccb,Hadhb,Decr1,Acot11,Mid1ip1,Pon2,Gpx4,Acsf2,Elovl5,Acad11,Cyp2c66,Acot7,Ndufab1,Cbr4,Hacd2,Acly,Cyp2u1,Acad10,Cyp4f18,Elovl6,Acbd6,Acot8,Acsl5,Acot4,Pon3,Mcee,Tecr,Crot,Acoxl,Ehhadh,Acot12,Acbd5,Acsl3,Cyp4f40,Morc2a,Elovl7,Acaca,Prkaa2,Prkag2,Cyp4a30b,Them4,Fads1,Mmaa,Acadl,Acadm,Acadvl,Acads,Acox1,Abcd1,Aldh3a2,Alox15,Alox5,Alox5ap,Cbr1,Pcca,Nudt19,Pecr,Cpt1a,Cpt1b,Cpt2,…
FBXL7 down-regulates AURKA during mitotic entry and in early mitosis	2.54571	0.00338631	Psmd6,Psmd12,Psmd5,Psmc6,Psmd9,Psmd11,Psmd1,Psme4,Psmb11,Rps27a,Psmb9,Psmb8,Psmd7,Psma2,Psma3,Psmb1,Psmb10,Psmb4,Psmb5,Psmb6,Psmb7,Psmc1,Psmc2,Psmc3,Psmc5,Psmd4,Psme1,Psme2,Psme3,Psmd10,Skp1,Psmd2,Psmd3,Uba52,Ubb,Rbx1,Psmc4,Psmd13,Psmd8,Psmd14,Psma1,Psma4,Psma5,Psma6,Psma7,Psmb2,Psmb3,Cul1,Psmf1
Fc epsilon receptor (FCERI) signaling	2.45885	0.00181541	Psmd6,Tab1,Ube2v1,Psmd12,Psmd5,Psmc6,Psmd9,Tab2,Psmd11,Psmd1,Psme4,Fbxw11,Plcg2,Psmb11,Pik3cb,Card11,Malt1,Bcl10,Btk,Calm1,Calm2,Calm3,Rps27a,Fcer1g,Fos,Grb2,Hras,Ikbkb,Ikbkg,Itk,Jun,Kras,Lat,Lcp2,Psmb9,Psmb8,Lyn,Grap2,Psmd7,Nfatc2,Nfkb1,Nfkbia,Pdpk1,Pik3ca,Pik3r1,Pik3r2,Plcg1,Ppp3ca,Ppp3cb,Ppp3r1,Psma2,Psma3,Psmb1,Psmb10,Psmb4,Psmb5,Psmb6,Psmb7,Psmc1,Psmc2,Psmc3,Psmc5,Psmd4,Psme1,Psme2,Psme3,Rac…
FCERI mediated MAPK activation	2.00509	0.0334627	Plcg2,Fcer1g,Fos,Grb2,Hras,Jun,Kras,Lat,Lcp2,Lyn,Grap2,Plcg1,Rac1,Shc1,Sos1,Syk,Vav1,Vav2,Map2k4,Map2k7,Mapk1,Mapk10,Mapk3,Mapk8,Mapk9,Pak2
FCERI mediated NF-kB activation	2.46292	0.00414924	Psmd6,Tab1,Ube2v1,Psmd12,Psmd5,Psmc6,Psmd9,Tab2,Psmd11,Psmd1,Psme4,Fbxw11,Psmb11,Card11,Malt1,Bcl10,Rps27a,Fcer1g,Ikbkb,Ikbkg,Psmb9,Psmb8,Lyn,Psmd7,Nfkb1,Nfkbia,Pdpk1,Psma2,Psma3,Psmb1,Psmb10,Psmb4,Psmb5,Psmb6,Psmb7,Psmc1,Psmc2,Psmc3,Psmc5,Psmd4,Psme1,Psme2,Psme3,Ube2d1,Cdc34,Rela,Psmd10,Skp1,Psmd2,Traf6,Psmd3,Uba52,Ubb,Ube2d2a,Psmc4,Psmd13,Psmd8,Psmd14,Map3k7,Psma1,Psma4,Psma5,Psma6,Psma7,Psmb2,…
Fcgamma receptor (FCGR) dependent phagocytosis	2.85019	0.00181541	Actr2,Abi2,Arpc5,Arpc4,Dock1,Wipf2,Brk1,Plcg2,Plpp5,Pld4,Nckap1l,Wasl,Actr3,Pik3cb,Elmo2,Elmo1,Baiap2,Arpc2,Abi1,Cyfip2,Abl1,Actb,Actg1,Arpc1b,Btk,Cd3g,Cd247,Cdc42,Crk,Wasf2,Ptk2,Fcgr1,Fcgr2b,Fgr,Fyn,Grb2,Hck,Nckipsd,Hsp90ab1,Hsp90aa1,Fcgr4,Limk1,Lyn,Myh9,Myo10,Myo1c,Myo5a,Nck1,Nf2,Nckap1,Wipf1,Pik3ca,Pik3r1,Pik3r2,Prkcd,Prkce,Plcg1,Pld2,Pld3,Rac1,Cyfip1,Pla2g6,Src,Syk,Vav1,Vav2,Was,Yes1,Arpc3,Ar…
FLT3 Signaling	2.18889	0.0209279	Akt1,Akt2,Cbl,Cdkn1b,Rps27a,Csk,Flt3l,Grb10,Grb2,Hras,Kras,Lck,Sh2b3,Grap2,Pik3ca,Pik3r1,Ptprj,Socs2,Sla,Sos1,Syk,Socs6,Uba52,Ubb,Foxo3,Akt3
Formation of a pool of free 40S subunits	5.54175	0.00181541	Eif3f,Rpl3l,Rps23,Rps21,Rpl15,Rpl36al,Rpl35,Rpl11,Rps10,Rpl14,Rplp2,Rpl37,Rps20,Rpl38,Rpl4,Rps27l,Rpl22l1,Rps13,Eif3h,Rpl39l,Rpl24,Rpl34,Rps15a,Rpl5,Rpl23a,Rpl12,Rpl13,Eif3k,Rps25,Rpl18a,Rps9,Rplp0,Rpl10,Eif3j1,Eif3a,Rpl31,Eif3e,Rpsa,Rps2,Rpl18,Rpl19,Rpl22,Rpl26,Rpl27,Rpl28,Rpl29,Rpl37a,Rpl36a,Rpl6,Rpl7,Rpl9,Rps14,Rps15,Rps16,Rps17,Rps18,Rps19,Rps24,Rps29,Rps3a1,Rps4x,Rps5,Rps6,Rps7,Rps8,Eif3g,Rp…
Formation of ATP by chemiosmotic coupling	3.47587	0.00181541	Atp5d,Atp5e,Atp5g2,Dmac2l,Atp5h,Atp5a1,Atp5b,Atp5c1,Atp5pb,Atp5g1,Atp5j,Atp5k,Atp5j2,Atp5l,Atp5o,Atp5g3
Formation of RNA Pol II elongation complex	2.02403	0.0217335	Wdr61,Polr2e,Gtf2h5,Polr2l,Ccnh,Polr2b,Ctdp1,Elob,Polr2g,Eloc,Ncbp2,Gtf2f2,Polr2d,Polr2f,Polr2i,Mllt3,Leo1,Ccnt2,Ncbp1,Iws1,Eaf1,Cdk9,Rtf1,Ccnt1,Cdk7,Gtf2h3,Ell,Ercc2,Ercc3,Gtf2h1,Supt16,Polr2h,Mnat1,Polr2k,Cdc73,Polr2a,Polr2c,Ssrp1,Supt4a,Supt5,Supt6,Tcea1,Paf1,Ctr9,Gtf2h2,Nelfa,Nelfcd,Nelfb,Eloa,Nelfe,Aff4,Mllt1,Gtf2f1
Formation of Senescence-Associated Heterochromatin Foci (SAHF)	1.88036	0.0358039	Asf1a,Cabin1,Ubn1,Ep400,H1f3,H1f0,Hira,H1f1,Hmga1,Hmga2,Lmnb1,H1f2,Rb1,Trp53,H1f5
Formation of the ternary complex, and subsequently, the 43S complex	4.75556	0.00181541	Eif3f,Rps23,Rps21,Rps10,Eif2s2,Rps20,Rps27l,Rps13,Eif3h,Rps15a,Eif3k,Rps25,Rps9,Eif3j1,Eif2s1,Eif3a,Eif3e,Rpsa,Rps2,Rps14,Rps15,Rps16,Rps17,Rps18,Rps19,Rps24,Rps29,Rps3a1,Rps4x,Rps5,Rps6,Rps7,Rps8,Eif3g,Rps28,Eif3i,Eif3d,Eif3c,Rps27,Eif2s3x,Rps3,Eif3l,Rps11,Rps26,Eif3b,Eif3m
G alpha (i) signalling events	-2.02023	0.00181541	Gng11,Cxcl16,Gpsm1,P2ry12,Adcy3,Adcy4,Rgs12,Adcy1,Grm4,Gpr37l1,Gpsm3,P2ry13,Pde4d,P2ry14,Grm6,Oxgr1,Rxfp3,Gpr31b,Gpsm2,Camkk2,Adcy6,Adcy7,Adcy8,Adcy9,Adora1,Adra2a,Adra2c,App,Grk2,Bdkrb1,Bdkrb2,Pde4c,C3,C3ar1,C5ar1,Calm1,Calm2,Calm3,Npb,Cdk5,Chrm4,Rxfp4,Cxcr3,Cxcr4,Ccr1,Ccr9,Ccr4,Ccr5,Ccr8,Ccr10,Ackr3,Cort,Gabbr2,Cx3cr1,Gnat3,Opn3,S1pr3,Fpr2,Fpr-rs3,Fpr1,Chrm2,Gal,Gna11,Gna14,Gnai1,Gnai2,Gnai3,Gn…
G-protein beta:gamma signalling	1.97655	0.0380197	Gng11,Pik3r6,Akt1,Akt2,Rhoa,Btk,Cdc42,Gnb1,Gnb2,Gnb4,Gnb5,Gng10,Gng2,Gng4,Gng5,Gngt2,Pdpk1,Plcb1,Plcb2,Plcb3,Akt3,Pik3r5,Pik3cg,Gng13
G1 Phase	2.34027	0.00784093	Ccnh,E2f4,Ppp2r2a,Abl1,Ccnd1,Ccnd2,Ccnd3,Ccne1,Ccne2,Cdk2,Cdk4,Cdk6,Cdk7,Cdkn1a,Cdkn1b,Cdkn1c,Cdkn2b,Rps27a,E2f2,E2f3,E2f5,Jak2,Lyn,Mnat1,Ppp2r1a,Ppp2ca,Ppp2cb,Rb1,Rbl1,Rbl2,Ptk6,Src,Cks1b,Skp1,Tfdp1,Uba52,Ubb,Cul1,Skp2
G1/S DNA Damage Checkpoints	2.13499	0.0113057	Psmd6,Psmd12,Psmd5,Psmc6,Psmd9,Psmd11,Psmd1,Psme4,Psmb11,Atm,Ccne1,Ccne2,Cdc25a,Cdk2,Cdkn1a,Cdkn1b,Chek1,Rps27a,Psmb9,Psmb8,Mdm2,Mdm4,Psmd7,Chek2,Psma2,Psma3,Psmb1,Psmb10,Psmb4,Psmb5,Psmb6,Psmb7,Psmc1,Psmc2,Psmc3,Psmc5,Psmd4,Psme1,Psme2,Psme3,Psmd10,Psmd2,Trp53,Psmd3,Uba52,Ubb,Psmc4,Psmd13,Psmd8,Psmd14,Cop1,Psma1,Psma4,Psma5,Psma6,Psma7,Psmb2,Psmb3,Zfp385a,Psmf1,Phf20
G2/M Transition	1.7762	0.0199352	Cep152,Psmd6,Tubgcp6,Haus6,Ccnh,Psmd12,Psmd5,Psmc6,Psmd9,Nde1,Haus3,Tubb6,Akap9,Ssna1,Ccp110,Psmd11,Tubgcp5,Dctn2,Psmd1,Psme4,Cep192,Xpo1,Fbxw11,Tubg1,Csnk1d,Optn,Haus5,Ppp2r2a,Mzt2,Ccnb1,Tpx2,Pkmyt1,Alms1,Ppme1,Ofd1,Tubb2b,Haus7,Psmb11,Tubgcp2,Cep57,Cep72,Tubal3,Ckap5,Haus8,Clasp1,Mzt1,Sdccag8,Bora,Ccnb2,Cdc25a,Cdc25b,Cdc25c,Cdk1,Cdk11b,Cdk2,Cdk7,Cdkn1a,Rps27a,Dctn1,Sfi1,Dync1h1,Dync1i2,Mapre1,H…
Gap junction trafficking	2.06691	0.0290024	Cltc,Tubb6,Tubb2b,Cltb,Tubal3,Actb,Actg1,Ap2m1,Dab2,Dnm1,Dnm2,Gja1,Gja4,Gjc1,Gjb1,Gjb2,Gjb3,Gjb4,Gjb5,Gjb6,Gjc2,Tuba1a,Tuba1b,Tuba4a,Tubb3,Tubb4b
Gap junction trafficking and regulation	2.09373	0.0260946	Cltc,Tubb6,Tubb2b,Cltb,Tubal3,Actb,Actg1,Ap2m1,Dab2,Dnm1,Dnm2,Gja1,Gja4,Gjc1,Gjb1,Gjb2,Gjb3,Gjb4,Gjb5,Gjb6,Gjc2,Src,Tjp1,Tuba1a,Tuba1b,Tuba4a,Tubb3,Tubb4b
GLI3 is processed to GLI3R by the proteasome	2.59599	0.00338631	Psmd6,Psmd12,Psmd5,Psmc6,Psmd9,Psmd11,Psmd1,Psme4,Psmb11,Rps27a,Psmb9,Psmb8,Psmd7,Prkaca,Prkacb,Psma2,Psma3,Psmb1,Psmb10,Psmb4,Psmb5,Psmb6,Psmb7,Psmc1,Psmc2,Psmc3,Psmc5,Psmd4,Psme1,Psme2,Psme3,Psmd10,Skp1,Psmd2,Psmd3,Uba52,Ubb,Rbx1,Gsk3b,Psmc4,Psmd13,Sufu,Psmd8,Psmd14,Psma1,Psma4,Psma5,Psma6,Psma7,Psmb2,Psmb3,Cul1,Psmf1
Glucagon-like Peptide-1 (GLP1) regulates insulin secretion	2.03944	0.0303442	Gng11,Kcns3,Rap1a,Gcg,Gnas,Gnb1,Gnb2,Gnb4,Gnb5,Gng10,Gng2,Gng4,Gng5,Gngt2,Itpr1,Itpr2,Itpr3,Prkaca,Prkacb,Rapgef3,Gng13
Gluconeogenesis	2.39078	0.00583132	Aldob,Slc25a11,G6pc3,Pck2,Aldoa,Aldoc,Slc25a12,Slc25a1,Eno1,Eno2,Eno3,Fbp2,Fbp1,G6pc,G6pc2,Slc37a4,Gapdh,Got1,Got2,Gpi1,Mdh2,Mdh1,Slc25a13,Pck1,Pgam1,Pgk1,Tpi1,Pgam2,Slc37a2,Slc25a10,Slc37a1
Glutamate Neurotransmitter Release Cycle	-1.69917	0.0398363	Ppfia2,Slc38a2,Ppfia4,Ppfia1,Slc17a7,Tspoap1,Ppfia3,Slc1a7,Gls,Rab3a,Slc1a1,Stx1a,Stxbp1,Syt1,Unc13b,Vamp2,Arl6ip5
Glutathione conjugation	2.05504	0.0291945	Cndp2,Mgst3,Chac2,Gstm7,Chac1,Ggt6,Oplah,Gstk1,Ggct,Esd,Ggt1,Gclc,Gclm,Gss,Gsta3,Gstm1,Gstm2,Gstm3,Gstm4,Gstm5,Gstm6,Gstp1,Gstt1,Gstt2,Gsto1,Gstz1,Mgst2,Hpgds,Mgst1,Ggt5,Akr1a1
Glycosphingolipid metabolism	2.0616	0.0284501	Gba2,Sumf2,Arsg,Glb1l,Neu4,Arsa,Asah1,Glb1,Smpd4,Galc,B4galnt1,Gba,Gm2a,Hexa,Hexb,Neu1,Neu3,Ctsa,Psap,Esyt2,Smpd1,Smpd2,Asah2,Ugcg,Gltp,Esyt1,Sumf1,Smpd3,Cerk
Golgi Associated Vesicle Biogenesis	3.25005	0.00181541	Snx9,Cltc,Ap4b1,Necap1,Gak,Snx2,Bloc1s3,Snx5,Picalm,Acbd3,Txndc5,Ap4e1,Ap1s2,Napa,Arrb1,Ap1b1,Ap1g1,Ap1m1,Ap1m2,Ap1s1,Ap3b1,Ap3s1,Arf1,Yipf6,Cpd,Dnm2,Fth1,Bloc1s1,Pum1,Hspa8,Igf2r,Tbc1d8b,Bloc1s6,Pik3c2a,Bloc1s4,Rab5c,Sh3gl2,Snapin,Sort1,Tpd52,Tfrc,Tgoln1,Vamp2,Vamp8,Ap1s3,Ocrl,Sh3d19,Golgb1,Dtnbp1,Hip1r
Golgi-to-ER retrograde transport	3.12195	0.00181541	Rab3gap2,Cenpe,Tmed3,Arfgap3,Tmed7,Kdelr2,Use1,Tmed9,Dctn4,Kifc1,Tubb6,Dynll2,Kdelr1,Tmed10,Dctn2,Kif18b,Copb1,Dync1li2,Stx18,Nbas,Kif23,Dync1li1,Kif26b,Kdelr3,Tubb2b,Kif2c,Gbf1,Tubal3,Klc4,Napg,Napa,Galnt2,Rab1b,Kif20b,Bicd2,Arfgap2,Kif22,Arf1,Arf3,Arf4,Arf5,Bicd1,Capza2,Capzb,Copa,Kif26a,Kif15,Dctn1,Dync1h1,Dync1i2,Galnt1,Kif11,Kif13b,Kif16b,Kif1b,Kif1c,Kif2a,Kif21a,Kif21b,Kif3a,Kif3b,Kif3c,Kif…
GPCR downstream signalling	-1.75221	0.00414924	Gng11,Abhd6,Cxcl16,Arhgef39,Arhgef37,Arhgef16,Lpar6,Nts,Taar3,Gpsm1,Daglb,Plekhg2,Ffar2,Ffar1,Ffar3,Arhgef18,P2ry6,Arhgef10,P2ry12,Adcy3,Adcy4,Dgkz,Arhgef3,Rgs12,Plxnb1,Pik3r6,Adcy1,Arhgef40,Grm4,Dagla,Arhgef10l,Gpr37l1,Gpsm3,P2ry13,Ffar4,Gpr68,Rxfp2,Pde4d,P2ry14,Grm5,Grm6,Oxgr1,Rxfp3,Akap13,Gpr31b,Gpsm2,Arhgef17,Abhd12,Camkk2,Pde2a,Arrb1,Adcy6,Adcy7,Adcy8,Adcy9,Adm,Adora1,Adora2a,Adora2b,Adra2a,…
GPCR ligand binding	-3.01128	0.00181541	Plppr4,Gng11,Cxcl16,Prlh,Ece1,Lpar6,Nts,Taar3,Ffar2,Ffar1,Ffar3,P2ry6,P2ry12,Grm4,Gpr37l1,P2ry13,Gpr68,Rxfp2,P2ry14,Grm5,Grm6,Oxgr1,Rxfp3,Nln,Gpr31b,Adm,Adora1,Adora2a,Adora2b,Adra2a,Adra2c,Adrb1,Adrb2,Agtr1a,App,Taar9,Bdkrb1,Bdkrb2,C3,C3ar1,C5ar1,Calca,Npb,Cck,Chrm1,Chrm4,Rxfp4,Cxcr3,Cxcr4,Ccr9,Ccr4,Ccr5,Ccr8,Ccr10,Ackr3,Cort,Gabbr2,Cx3cr1,P2ry10,Opn3,S1pr3,Edn1,Edn2,Edn3,Ednra,Ednrb,Adgre1,F2r,…
GTP hydrolysis and joining of the 60S ribosomal subunit	5.64022	0.00181541	Eif3f,Rpl3l,Rps23,Rps21,Rpl15,Rpl36al,Rpl35,Rpl11,Rps10,Rpl14,Rplp2,Eif2s2,Rpl37,Rps20,Rpl38,Rpl4,Rps27l,Rpl22l1,Rps13,Eif3h,Rpl39l,Rpl24,Rpl34,Rps15a,Rpl5,Rpl23a,Rpl12,Rpl13,Eif3k,Rps25,Eif4b,Rpl18a,Rps9,Rplp0,Eif4g1,Rpl10,Eif3j1,Eif2s1,Eif3a,Eif4a1,Eif4a2,Eif4e,Rpl31,Eif3e,Rpsa,Rps2,Rpl18,Rpl19,Rpl22,Rpl26,Rpl27,Rpl28,Rpl29,Rpl37a,Rpl36a,Rpl6,Rpl7,Rpl9,Rps14,Rps15,Rps16,Rps17,Rps18,Rps19,Rps24,…
HATs acetylate histones	2.0231	0.0283589	Ing5,H4c17,Kat8,H4c8,Kansl2,Meaf6,Brpf3,Jade1,Msl1,Hat1,Wdr5,Ogt,Kansl1,Jade2,Atf2,Msl2,Brpf1,Hcfc1,Rbbp7,Msl3,Ncoa1,Ncoa2,Mcrs1,Kat7,Kat6b,Jade3,H3c2,H4c11,H2bc8,H2bc11,H2bc3,H2bc21,Brd1,Ing4,Kansl3,H4c14,Phf20,H3c1
HDACs deacetylate histones	3.0454	0.00181541	Gatad2b,Kdm1a,H4c17,H2aj,H4c8,Hdac8,Gatad2a,Suds3,Hdac10,Hdac1,Arid4a,Brms1,Chd4,Hdac2,H2ac18,Hmg20b,Tbl1xr1,Rbbp7,Mbd3,Sap30l,Mta3,Rbbp4,Rest,Sap18,Chd3,Ncor2,Rcor1,Tbl1x,Gps2,Mta2,H3c2,H4c11,H2aw,H2ac10,H2bc8,H2bc11,H2bc3,H2bc21,Sap30,Phf21a,Arid4b,H4c14,H2ac21,H3c1
HDR through Homologous Recombination (HRR)	-1.8234	0.0181622	Dna2,Pole4,Rpa3,Rpa1,Rfc3,Pold4,Mus81,Topbp1,Atrip,Rfc5,Rfc4,Rmi1,Slx1b,Atm,Blm,Brca2,Chek1,Gen1,Rps27a,Polh,Hus1,Kat5,Mre11a,Pcna,Pold1,Pold2,Pole,Pole2,Rad1,Rad17,Rad51b,Rad51d,Rad9a,Rfc1,Rfc2,Slx4,Top3a,Uba52,Ubb,Wrn,Pole3,Exo1,Polk,Nbn,Rmi2,Spidr,Rbbp8,Eme2
HDR through Single Strand Annealing (SSA)	-1.9514	0.0095186	Dna2,Rpa3,Rpa1,Rfc3,Topbp1,Atrip,Rfc5,Rfc4,Rmi1,Abl1,Atm,Blm,Hus1,Kat5,Mre11a,Rad1,Rad17,Rad9a,Rfc2,Top3a,Wrn,Exo1,Nbn,Rmi2,Rbbp8
Hedgehog 'off' state	1.74811	0.0360327	Psmd6,Psmd12,Psmd5,Psmc6,Psmd9,Ift172,Tubb6,Psmd11,Psmd1,Fuz,Psme4,Adcy3,Adcy4,Adcy1,Ofd1,Ttc21b,Tubb2b,Ift140,Psmb11,Ift57,Adcy6,Adcy7,Adcy8,Adcy9,Gpr161,Dync2h1,Rps27a,Gli1,Gli2,Ift122,Itch,Ift52,Kif3a,Psmb9,Psmb8,Psmd7,Numb,Prkaca,Prkacb,Prkar1a,Prkar1b,Prkar2b,Psma2,Psma3,Psmb1,Psmb10,Psmb4,Psmb5,Psmb6,Psmb7,Psmc1,Psmc2,Psmc3,Psmc5,Psmd4,Psme1,Psme2,Psme3,Ptch1,Intu,Mks1,Psmd10,Skp1,Psmd2,Ift…
Hedgehog 'on' state	2.20386	0.00707417	Smurf2,Psmd6,Dzip1,Psmd12,Psmd5,Psmc6,Psmd9,Evc2,Psmd11,Psmd1,Psme4,Gas8,Ulk3,Psmb11,Smurf1,Spopl,Arrb1,Gpr161,Grk2,Rps27a,Gas1,Gli1,Gli2,Hhip,Ihh,Itch,Kif3a,Psmb9,Psmb8,Psmd7,Cdc73,Numb,Psma2,Psma3,Psmb1,Psmb10,Psmb4,Psmb5,Psmb6,Psmb7,Psmc1,Psmc2,Psmc3,Psmc5,Psmd4,Psme1,Psme2,Psme3,Ptch1,Boc,Arrb2,Psmd10,Spop,Psmd2,Psmd3,Uba52,Ubb,Rbx1,Psmc4,Psmd13,Sufu,Psmd8,Smo,Cdon,Psmd14,Evc,Psma1,Psma4,Psma…
Hedgehog ligand biogenesis	2.6153	0.00338631	Psmd6,Erlec1,Psmd12,Psmd5,Psmc6,Psmd9,Psmd11,Psmd1,Psme4,Vcp,Psmb11,Rps27a,Ihh,Psmb9,Psmb8,Psmd7,Disp2,P4hb,Derl2,Psma2,Psma3,Psmb1,Psmb10,Psmb4,Psmb5,Psmb6,Psmb7,Psmc1,Psmc2,Psmc3,Psmc5,Psmd4,Psme1,Psme2,Psme3,Os9,Sel1l,Psmd10,Psmd2,Psmd3,Uba52,Ubb,Psmc4,Psmd13,Psmd8,Psmd14,Psma1,Psma4,Psma5,Psma6,Psma7,Psmb2,Psmb3,Psmf1
Hemostasis	3.56958	0.00198904	Cenpe,Ppil2,Gng11,Abhd6,Nhlrc2,Ola1,Cdc37l1,Kdm1a,Pafah2,Mfn1,P2rx2,Kifc1,Tubb6,Atp2b1,Tmx3,Daglb,Chid1,Apool,Dock1,Slc7a6,Carmil1,Dock5,Cd177,Esam,Kif18b,P2ry12,Plcg2,Mmrn1,Qsox1,Dgkz,Rarres2,Ppia,Kif23,Pik3r6,Endod1,Cyb5r1,Brpf3,Mfn2,Dagla,Prcp,Kif26b,Ly6g6f,Hdac1,Jaml,Tubb2b,Kif2c,Mpig6b,Apob,Serpina3f,Tubal3,Klc4,Pik3cb,Rab5a,Olr1,Spp2,Abcc4,Dock11,Jmjd1c,Dock8,Abhd12,Sccpdh,Pcyox1l,Pde2a,Sri…
Homologous DNA Pairing and Strand Exchange	-2.23812	0.00218485	Dna2,Rpa3,Rpa1,Rfc3,Topbp1,Atrip,Rfc5,Rfc4,Rmi1,Atm,Blm,Brca2,Chek1,Hus1,Kat5,Mre11a,Rad1,Rad17,Rad51b,Rad51d,Rad9a,Rfc2,Top3a,Wrn,Exo1,Nbn,Rmi2,Rbbp8
HSP90 chaperone cycle for steroid hormone receptors (SHR) in the presence of ligand	2.99058	0.00181541	Dctn4,Tubb6,Dynll2,Dctn2,Dync1li2,Dync1li1,Tubb2b,Tubal3,Capza2,Capzb,Dctn1,Dync1h1,Dync1i2,Fkbp4,Fkbp5,Hspa8,Hspa1l,Dnaja1,Hspa2,Hsp90ab1,Hsp90aa1,Dnajb1,Dctn3,Stip1,Actr1a,Tuba1a,Tuba1b,Tuba4a,Tubb3,Dctn6,Ptges3,Actr10,Dnaja2,Dynll1,Dnaja4,Dctn5,Hspa1a,Tubb4b
Immunoregulatory interactions between a Lymphoid and a non-Lymphoid cell	1.84434	0.0398363	Ifitm3,Ifitm1,Siglecf,Jaml,Cd200r2,Cd300c2,Slamf7,B2m,H2-Q6,C3,Cd1d1,Cd22,Cd33,Cd34,Cd3e,Cd3g,Cd247,Cd81,Cd8a,Gm8909,Col3a1,Col1a1,Col1a2,Cxadr,Fcgr2b,Siglecg,H2-K1,H2-M3,H2-M9,H2-Q1,H2-Q10,H2-T23,H2-T24,Ifitm2,Icam1,Icam2,Itga4,Itgb1,Itgb2,Itgb7,Fcgr4,Siglece,Npdc1,Cd96,Nectin2,Pvr,Cd300lg,Lair1,Sftpd,Sh2d1a,Siglec1,Cd300a,Hcst,Pianp,Treml4,Gm11127,Slamf6
Inactivation of CSF3 (G-CSF) signaling	2.20361	0.0203535	Ube2d3,Elob,Eloc,Cul5,Socs3,Socs1,Rps27a,Csf3r,Hck,Jak2,Lyn,Ube2d1,Rnf7,Syk,Tyk2,Uba52,Ubb,Ube2d2a
Inhibition of DNA recombination at telomere	2.15438	0.0214586	H4c17,Pot1a,H2aj,H4c8,Acd,H2az2,Daxx,H2ac18,H2ax,H2az1,Terf1,Terf2,Atrx,H4c11,H2ac10,H2bc11,H2bc3,H2bc21,Terf2ip,H4c14
Insulin receptor recycling	3.16517	0.00181541	Atp6v1f,Atp6v1g2,Atp6v1g1,Atp6v1c1,Atp6v1d,Atp6v1h,Atp6v0e2,Atp6v1a,Atp6v1b2,Atp6v0d1,Atp6v1e1,Atp6v0e,Atp6v0a1,Atp6v0c,Atp6v0b,Insr,Atp6ap1,Atp6v0a2,Tcirg1
Integration of energy metabolism	1.99888	0.0214586	Gng11,Adipor2,Ffar1,Adipor1,Acsl3,Kcns3,Acaca,Prkaa2,Prkag2,Adipoq,Adcy6,Adra2a,Adra2c,Rap1a,Cacna1a,Cacna1c,Cacnb3,Cd36,Fasn,Gcg,Gna11,Gna14,Gnai1,Gnai2,Gnaq,Gnas,Gnb1,Gnb2,Gnb4,Gnb5,Gng10,Gng2,Gng4,Gng5,Gngt2,Itpr1,Itpr2,Itpr3,Marcks,Acsl4,Prkaca,Prkacb,Prkca,Plcb1,Plcb2,Plcb3,Prkar1a,Prkar1b,Prkar2b,Slc2a1,Slc2a2,Abcc8,Taldo1,Mlx,Tkt,Agpat1,Mlxipl,Rapgef3,Adcy5,Gng13
Integrin cell surface interactions	3.47496	0.00181541	Itga9,Col16a1,Col6a5,Itga1,Itga8,Bsg,Cd44,Cdh1,Col13a1,Col18a1,Col3a1,Col4a1,Col4a2,Col5a1,Col5a2,Col6a1,Col6a2,Col1a1,Col1a2,Fbn1,Fn1,Hspg2,Icam1,Icam2,Itga2,Itga2b,Itga3,Itga4,Itga5,Itga6,Itgae,Itgav,Itgax,Itgb1,Itgb2,Itgb3,Itgb5,Itgb6,Itgb7,Cd47,F11r,Kdr,Lum,Jam3,Pecam1,Col5a3,Tnc,Vwf
Integrin signaling	1.90541	0.0405512	Rap1a,Akt1,Bcar1,Crk,Csk,Ptk2,Fn1,Grb2,Itga2b,Itgb3,Pdpk1,Rap1b,Ptpn1,Rasgrp2,Shc1,Sos1,Src,Syk,Apbb1ip,Tln1,Vwf,Rapgef3
Interferon Signaling	1.98663	0.0266534	Ddx58,Ifna13,Eif4e3,Eif4g3,Oasl1,Uba7,Camk2d,Eif4g1,Camk2b,Camk2g,Socs3,Socs1,Ifna12,Eif4a1,Eif4a2,Eif4e,Eif4g2,Ifit1bl2,Ptpn6,Pde12,Ifna4,Ifnar1,Ifnar2,Ifnb1,Ifngr1,Ifngr2,Irf9,Jak2,Mx2,Nedd4,Prkcd,Plcg1,Ppm1b,Eif2ak2,Ptpn1,Ptpn11,Ptpn2,Trim25,Irf3,Tyk2,Ube2e1,Sumo1,Pias1,Arih1,Rnasel,Abce1,Ube2l6,Usp18,Flnb,Mapk3,Eif4e2,Ube2n,Eif4a3,Isg15
Interleukin-1 family signaling	2.42308	0.00263968	Psmd6,Tab1,Ube2v1,Psmd12,Psmd5,Psmc6,Psmd9,Peli1,Tnip2,Tab2,Psmd11,Gsdmd,Nkiras1,Irak4,Psmd1,Psme4,Fbxw11,Nkiras2,Psmb11,Irak3,Il1rl2,Nod1,Irak2,Il33,App,Casp1,Rps27a,Hmgb1,Ikbkb,Ikbkg,Il1a,Il1b,Il1r1,Irak1,Il1rap,Il1rn,Psmb9,Psmb8,Il1rl1,Psmd7,Myd88,Nfkb1,Nfkb2,Nfkbia,Nfkbib,Sqstm1,Psma2,Psma3,Psmb1,Psmb10,Psmb4,Psmb5,Psmb6,Psmb7,Psmc1,Psmc2,Psmc3,Psmc5,Psmd4,Psme1,Psme2,Psme3,Rela,S100b,Psmd10,…
Interleukin-1 signaling	2.21283	0.00419058	Psmd6,Tab1,Ube2v1,Psmd12,Psmd5,Psmc6,Psmd9,Peli1,Tnip2,Tab2,Psmd11,Nkiras1,Irak4,Psmd1,Psme4,Fbxw11,Nkiras2,Psmb11,Irak3,Nod1,Irak2,App,Rps27a,Hmgb1,Ikbkb,Ikbkg,Il1a,Il1b,Il1r1,Irak1,Il1rap,Il1rn,Psmb9,Psmb8,Psmd7,Myd88,Nfkb1,Nfkb2,Nfkbia,Nfkbib,Sqstm1,Psma2,Psma3,Psmb1,Psmb10,Psmb4,Psmb5,Psmb6,Psmb7,Psmc1,Psmc2,Psmc3,Psmc5,Psmd4,Psme1,Psme2,Psme3,Rela,S100b,Psmd10,Skp1,Tollip,Psmd2,Traf6,Psmd3,U…
Interleukin-17 signaling	2.07551	0.0185159	Tab1,Ube2v1,Tnip2,Dusp6,Tab2,Vrk3,Mapkapk3,Fbxw11,Dusp7,Dusp3,Rps6ka5,Nod1,Irak2,Atf1,Atf2,Rps27a,Creb1,Fos,Ikbkb,Ikbkg,Irak1,Jun,Mapkapk2,Nfkb1,Ppp2r1a,Ppp2ca,Ppp2cb,Skp1,Traf6,Uba52,Ubb,Mapk7,Dusp4,Map2k3,Map2k4,Map2k6,Map2k7,Map3k7,Map3k8,Mapk1,Mapk10,Mapk14,Mapk3,Mapk8,Mapk9,Cul1,Ube2n,Ripk2
Intra-Golgi and retrograde Golgi-to-ER traffic	2.815	0.00181541	Rab3gap2,Cenpe,Tmed3,Usp6nl,Arfgap3,Sys1,Tmed7,Plin3,Kdelr2,Use1,Snap29,Tmed9,Cog6,Dctn4,Kifc1,Tubb6,Dynll2,Kdelr1,Vps53,Tmf1,Vps51,Tmed10,Cog4,Dctn2,Rab43,Cog7,Kif18b,Copb1,Dync1li2,Stx18,Nbas,Arl1,Kif23,Dync1li1,Cyth4,Kif26b,Kdelr3,Tubb2b,Kif2c,Cog5,Gcc1,Gbf1,Tubal3,Klc4,Napg,Napa,Galnt2,Rab1b,Cog2,Trip11,Arfrp1,Alpi,Kif20b,Bicd2,Golga1,Arfip2,Arfgap2,Kif22,Arf1,Arf3,Arf4,Arf5,Bicd1,Capza2,Capz…
Intracellular signaling by second messengers	2.37621	0.00181874	Phlpp1,Frs2,Gatad2b,Lamtor4,Psmd6,Lamtor1,Sall4,Wwp2,Psmd12,Psmd5,Psmc6,Psmd9,Akt1s1,Foxo6,Rnf146,Rraga,Lamtor5,Maf1,Psmd11,Irak4,Psmd1,Gatad2a,Psme4,Adcy3,Adcy4,Epgn,Adcy1,Slc38a9,Strn,Otud3,Hdac1,Psmb11,Tnks2,Pik3cb,Chd4,Pip4k2b,Them4,Camkk2,Prr5,Prex2,Adcy6,Adcy7,Adcy8,Adcy9,Il33,Akt1,Akt2,Xiap,Areg,Grk2,Bmi1,Calm1,Calm2,Calm3,Casp9,Cbx4,Cd86,Phc3,Cdkn1a,Cdkn1b,Rps27a,Creb1,Csnk2a1,Csnk2a2,Csn…
Intrinsic Pathway for Apoptosis	2.46331	0.00404439	Diablo,Dynll2,Gsdmd,Bmf,Aven,Apaf1,Xiap,Bad,Bak1,Bax,Bcl2,Bcl2l1,Bid,Bcl2l11,Casp3,Casp7,Casp8,Casp9,Cycs,Gzmb,Nmt1,Septin4,Ppp3cc,Ppp3r1,Ywhab,Gsdme,Ywhae,Ywhag,Ywhah,Ywhaq,Ywhaz,Sfn,Apip,Dynll1,Pmaip1,Mapk1,Mapk3,Mapk8
Ion channel transport	2.487	0.00181541	Atp1a2,Asph,Atp6v1f,Atp6v1g2,Atp6v1g1,Atp6v1c1,Clca4b,Atp2b1,Mcoln2,Wnk1,Trpm4,Ano1,Atp2c2,Atp1a3,Ano10,Tpcn2,Ano9,Atp2c1,Sgk3,Atp13a1,Pdzd11,Ano6,Atp6v1d,Mlkl,Atp13a2,Wwp1,Camk2d,Wnk2,Atp6v1h,Nalcn,Atp6v0e2,Atp11b,Sri,Ano7,Asic2,Asic4,Raf1,Atp1a1,Atp1b1,Atp1b2,Atp1b3,Atp2a1,Atp2a2,Atp2b2,Atp6v1a,Atp6v1b2,Atp6v0d1,Atp6v1e1,Atp6v0e,Atp6v0a1,Atp7a,Atp7b,Atp8a1,Atp9a,Atp10a,Atp6v0c,Atp8b4,Calm1,Calm…
Ion homeostasis	2.11075	0.0217335	Ahcyl1,Atp1a2,Asph,Atp2b1,Atp1a3,Camk2d,Sri,Atp1a1,Atp1b1,Atp1b2,Atp1b3,Atp2a1,Atp2a2,Atp2b2,Calm1,Calm2,Calm3,Camk2b,Camk2g,Dmpk,Itpr1,Itpr2,Itpr3,Fxyd3,Prkaca,Ryr1,Ryr3,Slc8a1,Atp2a3,Atp2b4,Stim1,Abcc9,Tnni3,Fxyd1,Fxyd7
Ion transport by P-type ATPases	2.19759	0.0131492	Atp1a2,Atp2b1,Atp2c2,Atp1a3,Atp2c1,Atp13a1,Pdzd11,Atp13a2,Camk2d,Atp11b,Sri,Atp1a1,Atp1b1,Atp1b2,Atp1b3,Atp2a1,Atp2a2,Atp2b2,Atp7a,Atp7b,Atp8a1,Atp9a,Atp10a,Atp8b4,Calm1,Calm2,Calm3,Camk2b,Camk2g,Fxyd3,Atp8a2,Atp11a,Atp9b,Atp2a3,Atp2b4,Atp8b1,Fxyd1,Atp10b,Fxyd7,Atp11c,Atp13a4
Iron uptake and transport	2.95557	0.00181541	Atp6v1f,Atp6v1g2,Atp6v1g1,Atp6v1c1,Ftmt,Steap3,Cand1,Cybrd1,Atp6v1d,Steap2,Atp6v1h,Atp6v0e2,Aco1,Atp6v1a,Atp6v1b2,Atp6v0d1,Atp6v1e1,Atp6v0e,Atp6v0a1,Atp6v0c,Rps27a,Cp,Fbxl5,Fth1,Heph,Hfe,Hmox1,Hmox2,Atp6v0b,Nedd8,Slc11a2,Slc46a1,Slc40a1,Skp1,Atp6ap1,Atp6v0a2,Trf,Tfrc,Uba52,Ubb,Abcg2,Cul1,Tcirg1,Mcoln1,Flvcr1,Ireb2
ISG15 antiviral mechanism	2.25825	0.0155912	Ddx58,Eif4e3,Eif4g3,Uba7,Eif4g1,Eif4a1,Eif4a2,Eif4e,Eif4g2,Ifit1bl2,Mx2,Nedd4,Plcg1,Ppm1b,Eif2ak2,Trim25,Irf3,Ube2e1,Arih1,Ube2l6,Usp18,Flnb,Mapk3,Eif4e2,Ube2n,Eif4a3,Isg15
Keratinization	-2.20691	0.00181541	Lce1g,Krtap3-2,Krt20,Pkp2,Gm11562,1110025L11Rik,Klk5,Lce1b,Lipn,Krtap16-3,Kazn,Krtap16-1,Gm11568,Krtap1-4,Krt80,Dsp,Gm7138,Gm7137,Krt7,Gm5414,Krt77,Dsc2,Dsg2,Cela2a,Evpl,Gm11564,Jup,Krt10,Krt13,Krt14,Krt15,Krt18,Krt19,Krt1,Krt86,Krt8,Krtap12-1,Pkp1,Ppl,Rptn,Krtap10-10,Pkp3,Krt23,Perp,Pkp4,Gm11563
L13a-mediated translational silencing of Ceruloplasmin expression	5.66733	0.00181541	Eif3f,Rpl3l,Rps23,Rps21,Rpl15,Rpl36al,Rpl35,Rpl11,Rps10,Rpl14,Rplp2,Eif2s2,Rpl37,Rps20,Rpl38,Rpl4,Rps27l,Rpl22l1,Rps13,Eif3h,Rpl39l,Rpl24,Rpl34,Rps15a,Rpl5,Rpl23a,Rpl12,Rpl13,Eif3k,Rps25,Eif4b,Rpl18a,Rps9,Rplp0,Eif4g1,Rpl10,Eif3j1,Eif2s1,Eif3a,Eif4a1,Eif4a2,Eif4e,Rpl31,Eif3e,Rpsa,Rps2,Pabpc1,Rpl18,Rpl19,Rpl22,Rpl26,Rpl27,Rpl28,Rpl29,Rpl37a,Rpl36a,Rpl6,Rpl7,Rpl9,Rps14,Rps15,Rps16,Rps17,Rps18,Rps19…
L1CAM interactions	3.43701	0.00181541	Cltc,Tubb6,Ap2s1,Itga9,Ap2b1,Tubb2b,Tubal3,Actb,Actg1,Ap2a1,Ap2a2,Ap2m1,Dpysl2,Csnk2a1,Csnk2a2,Csnk2b,Dnm1,Dnm2,Egfr,Fgfr1,Itga2b,Itga5,Itgav,Itgb1,Itgb3,Msn,Ncam1,Nrp1,Numb,Rac1,Rdx,Sh3gl2,Sdcbp,Sptbn1,Src,Tuba1a,Tuba1b,Tuba4a,Tubb3,Vav2,Ezr,Ranbp9,Lypla2,Map2k1,Map2k2,Mapk1,Mapk3,Tubb4b
Laminin interactions	2.40033	0.0086874	Col18a1,Col4a1,Col4a2,Hspg2,Itga2,Itga3,Itga6,Itgb1,Lama1,Lama2,Lama3,Lama4,Lama5,Lamb1,Lamb2,Lamb3,Nid1,Nid2,Itgb4
LDL clearance	2.54947	0.00384382	Ldlrap1,Cltc,Pcsk9,Npc2,Ap2s1,Ap2b1,Apob,Ap2a1,Ap2a2,Ap2m1,Ldlr,Lipa,Npc1,Soat1,Nceh1,Soat2
Lysosome Vesicle Biogenesis	2.98435	0.00181541	Cltc,Ap4b1,Chmp2a,Txndc5,Cltb,Ap4e1,Ap1s2,Gns,Arrb1,Ap1b1,Ap1g1,Ap1g2,Ap1m1,Ap1m2,Ap1s1,Ap4m1,Ap4s1,App,Arf1,Dnase2a,Dnm2,Bloc1s1,Hgs,Hspa8,M6pr,Sh3gl2,Vamp2,Vamp8,Ap1s3,Ctsz
M Phase	1.48387	0.0342533	Lbr,Cenpe,Ska2,Anapc11,Cep152,Cenpp,Blzf1,Chmp4c,Anapc2,Psmd6,Tubgcp6,Cdc26,Spc25,Haus6,Cenpm,Golga2,Rae1,Chmp3,Dsn1,Nuf2,Psmd12,Psmd5,Pmf1,Ndc80,Psmc6,Mis12,Fbxo5,Psmd9,Ctdnep1,Nupl2,Nde1,Haus3,Rcc1,H4c17,Spc24,Itgb3bp,Cdca5,Pds5b,Tubb6,Kmt5a,Zwilch,Dynll2,Akap9,Ncapd2,Ssna1,Sgo2a,H2aj,Ube2c,Ccp110,Numa1,Chmp2b,Chmp2a,Anapc10,Psmd11,B9d2,H4c8,Tubgcp5,Nup35,Dctn2,Nup37,Nup43,Vrk2,Cdc16,Smc4,Goras…
Macroautophagy	2.55715	0.00181541	Lamtor4,Tomm6,Tomm7,Chmp4c,Lamtor1,Ube2v1,Atg4b,Chmp3,Map1lc3a,Atg10,Wdr45b,Mfn1,Map1lc3b,Atg12,Atg3,Tubb6,Tomm20,Usp30,Dynll2,Atg101,Arl13b,Rraga,Tomm5,Lamtor5,Pink1,Chmp2b,Chmp2a,Atg14,Dync1li2,Atg4d,Dync1li1,Fundc1,Slc38a9,Mfn2,Pgam5,Chmp7,Prkaa1,Tubb2b,Atg7,Mtmr3,Tubal3,Wipi2,Prkaa2,Prkag2,Chmp4b,Pik3r4,Atg4a,Chmp6,Atg16l1,Atg5,Atm,Rb1cc1,Cftr,Rps27a,Csnk2a1,Csnk2a2,Csnk2b,Uvrag,Atg4c,Dync1h1…
Major pathway of rRNA processing in the nucleolus and cytosol	3.71235	0.00181541	Isg20l2,Utp3,Bud23,Nip7,Rpl3l,Nol6,Pno1,Exosc3,Exosc7,Rps23,Rps21,Rpl15,Rpl36al,Rpl35,Exosc1,Riok3,Rpl11,Riok2,Rps10,Rpl14,Nop56,Rplp2,Utp11,Eri1,Rpl37,Rps20,Nob1,Rpl38,Rpp21,Ddx47,Noc4l,Rpl4,Rps27l,Mphosph10,Rpl22l1,Rps13,Rpl39l,Rpl24,Rpl34,Mphosph6,Nol11,Ebna1bp2,Exosc8,Imp3,Rpp25,Rps15a,Ddx49,Rpl5,Riok1,Csnk1d,Rpl23a,Tsr1,Mtrex,Wdr43,Utp14a,Utp15,Rpl12,Dis3,Wdr3,Tex10,Rpl13,Wdr75,Fcf1,Nol9,Rrp…
MAP kinase activation	2.07551	0.0185159	Tab1,Ube2v1,Tnip2,Dusp6,Tab2,Vrk3,Mapkapk3,Fbxw11,Dusp7,Dusp3,Rps6ka5,Nod1,Irak2,Atf1,Atf2,Rps27a,Creb1,Fos,Ikbkb,Ikbkg,Irak1,Jun,Mapkapk2,Nfkb1,Ppp2r1a,Ppp2ca,Ppp2cb,Skp1,Traf6,Uba52,Ubb,Mapk7,Dusp4,Map2k3,Map2k4,Map2k6,Map2k7,Map3k7,Map3k8,Mapk1,Mapk10,Mapk14,Mapk3,Mapk8,Mapk9,Cul1,Ube2n,Ripk2
MAP2K and MAPK activation	3.44368	0.00181541	Wdr83,Il17rd,Arrb1,Actb,Actg1,Braf,Rap1a,Araf,Raf1,Csk,Fn1,Hras,Itga2b,Itgb3,Kras,Ksr1,Mark3,Lamtor2,Rap1b,Arrb2,Src,Ywhab,Apbb1ip,Tln1,Vcl,Vwf,Lamtor3,Pebp1,Map2k1,Map2k2,Mapk1,Mapk3,Iqgap1,Cnksr1
MAPK family signaling cascades	2.7491	0.00181951	Frs2,Cdc14a,Psmd6,Psmd12,Psmd5,Psmc6,Psmd9,Dusp6,Wdr83,Spred3,Psmd11,Rasgrp4,Dab2ip,Abhd17c,Psmd1,Dusp16,Psme4,Xpo1,Septin7,Cdc42ep2,Dusp7,Epgn,Brap,Il17rd,Psmb11,Pik3cb,Camk2d,Syngap1,Rasgrp3,Dusp5,Arrb1,Actb,Actg1,Braf,Rap1a,Araf,Areg,Raf1,Artn,Bcl2l1,Zdhhc9,Fntb,Calm1,Calm2,Calm3,Camk2b,Camk2g,Ccnd3,Cdk1,Cdc42,Rps27a,Csf2ra,Csk,Dlg1,Dlg4,Egfr,Erbb2,Ereg,Ptk2,Fgf15,Fgf2,Fgf7,Fgf9,Fgfr1,Fgfr2,Fl…
MAPK targets/ Nuclear events mediated by MAP kinases	1.85921	0.0472435	Dusp6,Vrk3,Dusp7,Dusp3,Rps6ka5,Atf1,Atf2,Creb1,Fos,Jun,Mapkapk2,Ppp2r1a,Ppp2ca,Ppp2cb,Mapk7,Dusp4,Mapk1,Mapk10,Mapk14,Mapk3,Mapk8,Mapk9
MAPK1/MAPK3 signaling	2.55383	0.00181541	Frs2,Psmd6,Psmd12,Psmd5,Psmc6,Psmd9,Dusp6,Wdr83,Spred3,Psmd11,Rasgrp4,Dab2ip,Abhd17c,Psmd1,Dusp16,Psme4,Dusp7,Epgn,Brap,Il17rd,Psmb11,Pik3cb,Camk2d,Syngap1,Rasgrp3,Dusp5,Arrb1,Actb,Actg1,Braf,Rap1a,Araf,Areg,Raf1,Artn,Bcl2l1,Zdhhc9,Fntb,Calm1,Calm2,Calm3,Camk2b,Camk2g,Cdk1,Rps27a,Csf2ra,Csk,Dlg1,Dlg4,Egfr,Erbb2,Ereg,Ptk2,Fgf15,Fgf2,Fgf7,Fgf9,Fgfr1,Fgfr2,Flt3l,Fn1,Fnta,Fyn,Gdnf,Gfra3,Gfra4,Kbtbd7,…
MAPK6/MAPK4 signaling	2.72344	0.00181541	Cdc14a,Psmd6,Psmd12,Psmd5,Psmc6,Psmd9,Psmd11,Psmd1,Psme4,Xpo1,Septin7,Cdc42ep2,Psmb11,Ccnd3,Cdk1,Cdc42,Rps27a,Hspb1,Dnajb1,Psmb9,Psmb8,Mapkapk5,Psmd7,Mapk6,Prkaca,Prkacb,Psma2,Psma3,Psmb1,Psmb10,Psmb4,Psmb5,Psmb6,Psmb7,Psmc1,Psmc2,Psmc3,Psmc5,Psmd4,Psme1,Psme2,Psme3,Rac1,Psmd10,Kalrn,Cdc14b,Psmd2,Psmd3,Uba52,Ubb,Foxo1,Foxo3,Psmc4,Psmd13,Psmd8,Cdc42ep5,Psmd14,Psma1,Psma4,Psma5,Psma6,Psma7,Psmb2,Ps…
Membrane Trafficking	3.18392	0.00210691	Syt11,Dennd4b,Rab3gap2,Cenpe,0610009B22Rik,Tmed3,Usp6nl,Necap2,Vta1,Trappc2,Arfgap3,Chmp4c,Sar1b,Sys1,Snx9,Golga2,Tmed7,Trappc5,Tbc1d15,Gapvd1,Chmp3,Actr2,Lman2,Plin3,Kdelr2,Sec24b,Vps28,Trappc13,Use1,Trappc6a,Dennd1b,Ubap1,Tbc1d20,Ldlrap1,Cltc,Map1lc3b,Snap29,Ap4b1,Tmed9,Cog6,Necap1,Dctn4,Stx17,Dennd4c,Gak,Arpc5,Rab39b,Snx2,Rab32,Ppp6c,Kifc1,Tubb6,Ccz1,Vps37b,Tbc1d14,Arpc4,Dynll2,Kdelr1,Vps53,Ra…
MET activates PTK2 signaling	2.46643	0.00437613	Col11a2,Col3a1,Col5a1,Col5a2,Col1a1,Col1a2,Col27a1,Ptk2,Fn1,Hgf,Itga2,Itga3,Itgb1,Lama1,Lama2,Lama3,Lama4,Lama5,Lamb1,Lamb2,Lamb3,Src,Col5a3
MET promotes cell motility	2.58882	0.00181541	Rapgef1,Rap1a,Col11a2,Col3a1,Col5a1,Col5a2,Col1a1,Col1a2,Crk,Crkl,Col27a1,Ptk2,Fn1,Gab1,Grb2,Hgf,Itga2,Itga3,Itgb1,Lama1,Lama2,Lama3,Lama4,Lama5,Lamb1,Lamb2,Lamb3,Rap1b,Rac1,Tns4,Src,Col5a3,Tns3
Metabolism of carbohydrates	1.8925	0.00471976	Pgls,Aldob,Rpe,Rae1,Pgm2,Nupl2,Slc25a11,Dcxr,Gnpda2,Chpf2,G6pc3,Dera,Cryl1,Phkg2,Phkb,Nup35,Nup37,Nup43,Xylt1,Slc35d2,Csgalnact1,Nup107,Pgm2l1,Nup133,Rbks,Hs3st4,Glyctk,Nup93,Nupl1,Gpc2,Seh1l,Chst14,Adpgk,Pgm1,B3gnt3,Nup155,Pfkfb3,Nup54,B3gat3,Ndc1,Fut11,Chsy1,Nup98,Pfkfb4,Man2c1,Gbe1,Chpf,Gale,Pck2,Glb1l,Shpk,Pom121,Gns,Slc35b3,B4gat1,Tpr,Chst1,Aldh1a1,Aldoa,Aldoc,Akr1b3,Gusb,Pygl,Phka2,Manba,Pg…
Metabolism of fat-soluble vitamins	2.70551	0.00181541	Vkorc1l1,Ubiad1,Gpc2,Bco2,Apob,Plb1,Lrp12,Clps,Apoa1,Apoa4,Apoc2,Apoc3,Apoe,Akr1b7,Lrat,Gpc1,Gpc4,Sdc2,Hspg2,Lrp1,Rdh11,Rbp1,Rbp2,Rbp4,Sdc1,Sdc3,Sdc4,Gpc6,Vkorc1,Bco1,Lrp10
Metabolism of lipids	2.39072	0.00210691	Lbr,Pitpnm3,Sptssb,Acer3,Msmo1,Lpcat4,Osbpl6,Gba2,Pla2g12a,Stard7,Tnfaip8l1,Acer2,Crls1,Ormdl3,Acp6,Hacd4,Cyp4a29,Tafazzin,Acot13,Ormdl2,Pnpla2,Plbd1,Pccb,Cept1,Smarcd3,Oxct1,Pi4k2b,Mboat2,Hadhb,Cers4,Far1,Pnpla8,Decr1,Osbpl9,Agpat2,Samd8,Slc44a1,Gpat3,Aldh3b1,Acot11,Dgat2,Sumf2,Plpp3,Cert1,Mid1ip1,Pon2,Plekha8,Fdx2,Gpx4,Tmem86b,Agpat4,Acsf2,Far2,Rab14,Pmvk,Pcyt2,Slc44a2,Plekha1,Hsd3b7,Prkd2,Elov…
Metabolism of nitric oxide: NOS3 activation and regulation	2.67616	0.00231727	Nosip,Nostrin,Zdhhc21,Ddah1,Wasl,Akt1,Calm1,Calm2,Calm3,Cav1,Dnm2,Hsp90aa1,Cygb,Nos3,Lypla1,Ddah2
Metabolism of nucleotides	1.76177	0.0402089	Ampd1,Ak5,Gmpr,Adprm,Cmpk1,Dpyd,Nt5c1a,Paics,Entpd4,Ppat,Nudt13,Uckl1,Ak8,Cad,Nt5c1b,Nt5m,Entpd8,Cda,Gmpr2,Pfas,Nudt9,Nt5c3,Atic,Nudt16,Adal,Ampd2,Nt5c2,Ada,Adk,Adsl,Adss,Ak1,Ak2,Ak4,Ampd3,Dut,Aprt,Entpd1,Entpd2,Entpd6,Entpd5,Dck,Ak6,Nme3,Gart,Gda,Gsr,Guk1,Uck2,Hprt,Itpa,Nudt18,Nudt15,Txnrd1,Nudt1,Nt5c,Nme1,Nme2,Entpd3,Pnp,Ctps,Rrm1,Rrm2,Nudt5,Tk1,Dtymk,Txn1,Tyms,Uck1,Umps,Upp1,Xdh,Rrm2b,Ctps2,Sa…
Metabolism of polyamines	1.79537	0.0472435	Psmd6,Psmd12,Psmd5,Psmc6,Psmd9,Psmd11,Psmd1,Psme4,Psmb11,Agmat,Amd1,Azin2,Paox,Psmb9,Psmb8,Psmd7,Nqo1,Oaz1,Oaz2,Odc1,Psma2,Psma3,Psmb1,Psmb10,Psmb4,Psmb5,Psmb6,Psmb7,Psmc1,Psmc2,Psmc3,Psmc5,Psmd4,Psme1,Psme2,Psme3,Sat1,Sms,Psmd10,Srm,Azin1,Psmd2,Psmd3,Psmc4,Psmd13,Psmd8,Psmd14,Psma1,Psma4,Psma5,Psma6,Psma7,Psmb2,Psmb3,Smox,Psmf1
Metabolism of steroids	1.68924	0.0457213	Lbr,Msmo1,Osbpl6,Osbpl9,Fdx2,Pmvk,Hsd3b7,Slc51b,Arv1,Cyp27a1,Sc5d,Osbpl3,Scap,Stard4,Stard5,Stard6,Acot8,Sumo2,Tm7sf2,Slc51a,Mbtps2,Plpp6,Dhcr24,Stard3nl,Osbp,Abcc3,Tspoap1,Akr1b3,Cyp11b1,Fdps,Akr1b7,Hmgcs1,Acat2,Tspo,Ch25h,Cyp11a1,Cyp17a1,Cyp19a1,Cyp21a1,Cyp51,Cyp7b1,Dhcr7,Srd5a1,Ebp,Fdft1,Fdx1,Fdxr,Akr1b8,Ggps1,Hmgcr,Hsd11b1,Hsd11b2,Hsd17b2,Hsd17b4,Hsd17b7,Fabp6,Kpnb1,Hsd17b11,Lss,Amacr,Mvk,Nco…
Metabolism of vitamins and cofactors	2.00556	0.00384382	Coq3,Parp4,Nmnat1,Ppcdc,Pccb,Mmachc,Slc25a19,Parp6,Aasdhppt,Slc5a6,Nudt12,Lmbrd1,Mocos,Nadk2,Naxd,Mocs3,Nmrk2,Vkorc1l1,Slc52a3,Slc22a13,Slc25a32,Pnpo,Pdss2,Ubiad1,Coasy,Coq2,Gpc2,Gphn,Mccc1,Bco2,Pdzd11,Thtpa,Pank4,Slc25a16,Ppcs,Mthfd1l,Nmnat3,Apob,Pank2,Mtr,Acaca,Aldh1l1,Mthfs,Shmt2,Mthfd1,Plb1,Lrp12,Mthfd2l,Pank1,Mmadhc,Mmaa,Cyb5a,Acp5,Cyb5r3,Clps,Akt1,Apoa1,Apoa4,Apoc2,Apoc3,Apoe,Akr1b7,Mmab,Bs…
MHC class II antigen presentation	3.66405	0.00181541	Ctso,Ifi30,Cenpe,Sar1b,Sec24b,Cltc,Dctn4,Tubb6,Dynll2,Ap2s1,Sec31a,Sec24d,Dctn2,Dync1li2,Ap2b1,Kif23,Dync1li1,Tubb2b,Kif2c,Tubal3,Klc4,Ap1s2,Kif22,Ap1b1,Ap1g1,Ap1m1,Ap1m2,Ap1s1,Ap2a1,Ap2a2,Ap2m1,Sec24a,Arf1,Sec13,Canx,Capza2,Capzb,Kif26a,Ctsb,Ctsc,Ctsd,Ctse,Ctsh,Ctsk,Ctsl,Ctss,Kif15,Dctn1,Dync1h1,Dync1i2,Dnm1,Dnm2,H2-DMb2,H2-Oa,Cd74,Kif11,Kif2a,Kif3a,Kif3b,Kif3c,Kif5b,Kifap3,Lag3,Rilp,Ctsa,Lgmn,K…
Mitochondrial biogenesis	3.55451	0.00181541	Atp5d,Atp5e,Atp5g2,Dmac2l,Sirt5,Atp5h,Idh2,Sirt4,Atp5a1,Atp5b,Atp5c1,Atp5pb,Atp5g1,Atp5j,Atp5k,Cycs,Gabpa,Gabpb1,Glud1,Sod2,Atp5j2,Atp5l,Acss2,Atp5o,Atp5g3,Sirt3
Mitochondrial Fatty Acid Beta-Oxidation	2.51622	0.00332545	Acot13,Pccb,Hadhb,Decr1,Acot11,Acsf2,Acad11,Acot7,Ndufab1,Acad10,Acbd6,Mcee,Acot12,Them4,Mmaa,Acadl,Acadm,Acadvl,Acads,Pcca,Dbi,Eci1,Hadh,Mmut,Acaa2,Mecr,Mcat,Echs1,Hadha
Mitochondrial translation	2.2669	0.00414924	Mrpl54,Aurkaip1,Chchd1,Mrps36,Mrpl4,Mrpl35,Mrps28,Mrps16,Mrps17,Mrps26,Mrps21,Mrps15,Mrpl11,Mrpl20,Mrpl51,Mrpl33,Mrps18b,Mrpl45,Mrpl55,Mrpl42,Mrpl46,Mrpl18,Mrpl24,Mrpl57,Mrrf,Mrpl14,Mrpl53,Mrpl13,Mrps18a,Mrpl58,Mrpl28,Mrps35,Mrps18c,Mrpl52,Oxa1l,Mrpl44,Gadd45gip1,Mrps9,Ptcd3,Mrpl47,Mrpl41,Mrpl10,Mrpl30,Mrpl32,Mtrf1l,Mrps5,Mrpl9,Mrps34,Mrps33,Mrps7,Mrpl40,Mrpl49,Mrpl48,Mrpl23,Mrps2,Mrpl22,Mrps27,M…
Mitochondrial translation elongation	2.27364	0.00414924	Mrpl54,Aurkaip1,Chchd1,Mrps36,Mrpl4,Mrpl35,Mrps28,Mrps16,Mrps17,Mrps26,Mrps21,Mrps15,Mrpl11,Mrpl20,Mrpl51,Mrpl33,Mrps18b,Mrpl45,Mrpl55,Mrpl42,Mrpl46,Mrpl18,Mrpl24,Mrpl57,Mrpl14,Mrpl53,Mrpl13,Mrps18a,Mrpl58,Mrpl28,Mrps35,Mrps18c,Mrpl52,Oxa1l,Mrpl44,Gadd45gip1,Mrps9,Ptcd3,Mrpl47,Mrpl41,Mrpl10,Mrpl30,Mrpl32,Mrps5,Mrpl9,Mrps34,Mrps33,Mrps7,Mrpl40,Mrpl49,Mrpl48,Mrpl23,Mrps2,Mrpl22,Mrps27,Mrps6,Mrpl37,…
Mitochondrial translation termination	2.25326	0.00414924	Mrpl54,Aurkaip1,Chchd1,Mrps36,Mrpl4,Mrpl35,Mrps28,Mrps16,Mrps17,Mrps26,Mrps21,Mrps15,Mrpl11,Mrpl20,Mrpl51,Mrpl33,Mrps18b,Mrpl45,Mrpl55,Mrpl42,Mrpl46,Mrpl18,Mrpl24,Mrpl57,Mrrf,Mrpl14,Mrpl53,Mrpl13,Mrps18a,Mrpl58,Mrpl28,Mrps35,Mrps18c,Mrpl52,Oxa1l,Mrpl44,Gadd45gip1,Mrps9,Ptcd3,Mrpl47,Mrpl41,Mrpl10,Mrpl30,Mrpl32,Mtrf1l,Mrps5,Mrpl9,Mrps34,Mrps33,Mrps7,Mrpl40,Mrpl49,Mrpl48,Mrpl23,Mrps2,Mrpl22,Mrps27,M…
Mitophagy	2.09591	0.0276211	Tomm6,Tomm7,Map1lc3a,Mfn1,Map1lc3b,Atg12,Tomm20,Tomm5,Pink1,Fundc1,Mfn2,Pgam5,Atg5,Csnk2a1,Csnk2a2,Csnk2b,Sqstm1,Tomm40,Src,Ulk1,Vdac1,Tomm22,Tomm70a
Mitotic G1 phase and G1/S transition	1.75297	0.0283589	Psmd6,Ccnh,Pole4,Psmd12,Psmd5,Psmc6,Psmd9,Cdt1,Lin54,Rpa3,Rpa1,Psmd11,Mcm10,Psmd1,E2f4,Ppp2r2a,Hdac1,Lin37,Abl1,Akt1,Akt2,Ccnd1,Ccnd2,Ccnd3,Ccne1,Ccne2,Cdc25a,Cdc45,Cdc7,Cdk2,Cdk4,Cdk6,Cdk7,Cdkn1a,Cdkn1b,Cdkn1c,Cdkn2b,Rps27a,E2f2,Dyrk1a,E2f3,E2f5,Jak2,Psmb9,Psmb8,Lyn,Mcm3,Mcm2,Mcm4,Mcm5,Mcm6,Mcm7,Mnat1,Psmd7,Orc3,Orc1,Orc2,Pola1,Pola2,Pole,Pole2,Ppp2r1a,Ppp2ca,Ppp2cb,Psma2,Psma3,Psmb1,Psmb10,Psmb…
Mitotic G2-G2/M phases	1.7621	0.0216122	Cep152,Psmd6,Tubgcp6,Haus6,Ccnh,Psmd12,Psmd5,Psmc6,Psmd9,Nde1,Haus3,Tubb6,Akap9,Ssna1,Ccp110,Psmd11,Tubgcp5,Dctn2,Psmd1,Psme4,Cep192,Xpo1,Fbxw11,Tubg1,Csnk1d,Optn,Haus5,Ppp2r2a,Mzt2,Ccnb1,Tpx2,Pkmyt1,Alms1,Ppme1,Ofd1,Tubb2b,Haus7,Psmb11,Tubgcp2,Cep57,Cep72,Tubal3,Ckap5,Haus8,Clasp1,Mzt1,Sdccag8,Bora,Ccnb2,Cdc25a,Cdc25b,Cdc25c,Cdk1,Cdk11b,Cdk2,Cdk7,Cdkn1a,Rps27a,Dctn1,Sfi1,Dync1h1,Dync1i2,E2f3,Map…
Molecules associated with elastic fibres	2.28908	0.0132769	Mfap1a,Emilin1,Ltbp1,Ltbp4,Mfap4,Itga8,Bmp2,Bmp4,Bmp7,Eln,Fbln2,Fbn1,Fn1,Itgav,Itgb1,Itgb3,Itgb5,Itgb6,Ltbp2,Ltbp3,Mfap2,Emilin2,Mfap5,Mfap3,Tgfb1,Fbln5,Efemp2
mRNA 3'-end processing	2.30388	0.0074782	Sarnp,Clp1,Thoc7,Magohb,Chtop,Fip1l1,Cstf1,Srsf6,Ncbp2,Upf3b,Sympk,Nudt21,Ddx39a,Srsf11,U2af1l4,Thoc2,Fyttd1,Zc3h11a,Cdc40,Cpsf7,Ncbp1,Thoc3,Poldip3,Wdr33,Pcf11,Thoc5,Srsf9,Cstf2,U2af1,Srsf1,Magoh,Cstf2t,Papola,Cpsf2,Srrm1,Rnps1,Srsf2,Srsf3,Srsf5,Ddx39b,Cpsf4,Pabpn1,Alyref,Cpsf3,U2af2,Thoc6,Rbm8a,Casc3,Eif4a3,Srsf7,Thoc1,Cpsf1,Slu7,Dhx38,Cstf3
mRNA Splicing	2.40858	0.00181541	Hnrnpf,Sf3b6,Cwc15,Lsm7,Ppih,Sf3b5,Clp1,Snw1,Lsm5,Polr2e,Magohb,Polr2l,Snrnp40,Snrnp27,Ctnnbl1,Prpf38a,Rbm22,Crnkl1,Fip1l1,Zmat5,Zcrb1,Rnpc3,Cwc27,Snrpd3,Cstf1,Ppil4,Xab2,Sf3a1,Cwc25,Polr2b,Ccar1,Lsm3,Polr2g,Snrnp48,Puf60,U2surp,Srsf6,Snrpg,Bud31,Ncbp2,Upf3b,Bcas2,Sympk,Nudt21,Gcfc2,Phf5a,Syf2,Dnajc8,Gtf2f2,Ppil1,Prpf6,Snrpa1,Prpf31,Hnrnpul1,Sf3b3,Dhx16,Srsf11,U2af1l4,Polr2d,Polr2f,Snrpf,Polr2i,P…
mRNA Splicing - Major Pathway	2.51871	0.00181541	Hnrnpf,Sf3b6,Cwc15,Lsm7,Ppih,Sf3b5,Clp1,Snw1,Lsm5,Polr2e,Magohb,Polr2l,Snrnp40,Snrnp27,Ctnnbl1,Prpf38a,Rbm22,Crnkl1,Fip1l1,Cwc27,Snrpd3,Cstf1,Ppil4,Xab2,Sf3a1,Cwc25,Polr2b,Ccar1,Lsm3,Polr2g,Puf60,U2surp,Srsf6,Snrpg,Bud31,Ncbp2,Upf3b,Bcas2,Sympk,Nudt21,Gcfc2,Phf5a,Syf2,Dnajc8,Gtf2f2,Ppil1,Prpf6,Snrpa1,Prpf31,Hnrnpul1,Sf3b3,Dhx16,Srsf11,U2af1l4,Polr2d,Polr2f,Snrpf,Polr2i,Prpf4,Fus,Ppil3,Cd2bp2,Sugp…
mRNA Splicing - Minor Pathway	1.81162	0.0498245	Sf3b6,Sf3b5,Polr2e,Polr2l,Snrnp40,Zmat5,Zcrb1,Rnpc3,Snrpd3,Polr2b,Polr2g,Snrnp48,Srsf6,Snrpg,Ncbp2,Gtf2f2,Prpf6,Sf3b3,Polr2d,Polr2f,Snrpf,Polr2i,Ddx42,Ncbp1,Ddx23,Snrpd2,Sf3b4,Snrnp35,Srsf1,Snrnp25,Polr2h,Polr2k,Polr2a,Polr2c,Srsf2,Eftud2,Snrpb,Snrpd1,Snrpe,Snu13,Ybx1,Sf3b2,Snrnp200,Txnl4a,Lsm2,Prpf8,Srsf7,Gtf2f1
MTOR signalling	2.07562	0.0260946	Lamtor4,Lamtor1,Akt1s1,Rraga,Lamtor5,Cab39l,Slc38a9,Strada,Rps6kb1,Prkaa1,Prkaa2,Prkag2,Eif4b,Akt1,Akt2,Eif4g1,Cab39,Eef2k,Eif4e,Eif4ebp1,Fkbp1a,Lamtor2,Ppm1a,Prkab1,Rragd,Rheb,Rps6,Stk11,Rragc,Ywhab,Lamtor3,Mlst8,Mtor,Stradb,Tsc1
mTORC1-mediated signalling	2.17541	0.0200561	Lamtor4,Lamtor1,Akt1s1,Rraga,Lamtor5,Slc38a9,Rps6kb1,Eif4b,Eif4g1,Eef2k,Eif4e,Eif4ebp1,Fkbp1a,Lamtor2,Rragd,Rheb,Rps6,Rragc,Ywhab,Lamtor3,Mlst8,Mtor
Muscle contraction	2.07068	0.00869162	Ahcyl1,Atp1a2,Asph,Myl9,Npr2,Nppa,Myl12b,Atp2b1,Akap9,Atp1a3,Scn3b,Scn2b,Trim72,Camk2d,Sri,Itga1,Acta1,Actc1,Actg2,Acta2,Atp1a1,Atp1b1,Atp1b2,Atp1b3,Atp2a1,Atp2a2,Atp2b2,Cacna1c,Calm1,Calm2,Calm3,Camk2b,Camk2g,Scn2a,Des,Dmpk,Dmd,Fgf11,Kcnip2,Cacng7,Itgb5,Itpr1,Itpr2,Itpr3,Kcnd1,Kcnh2,Kcnj2,Kcnk1,Kcnk2,Kcnk5,Kcnq1,Fxyd3,Myh3,Myl7,Myl1,Myl6,Mylpf,Tmod4,Tmod3,Npr1,Prkaca,Pxn,Kcnk6,Myl6b,Ryr1,Ryr3,Sc…
MyD88 cascade initiated on plasma membrane	2.07958	0.015	Tab1,Ube2v1,Peli1,Tnip2,Dusp6,Tab2,Vrk3,Nkiras1,Mapkapk3,Fbxw11,Dusp7,Nkiras2,Dusp3,Rps6ka5,Nod1,Irak2,App,Atf1,Atf2,Rps27a,Creb1,Fos,Hmgb1,Ikbkb,Ikbkg,Irak1,Jun,Mapkapk2,Nfkb1,Nfkb2,Nfkbia,Nfkbib,Ppp2r1a,Ppp2ca,Ppp2cb,Rela,S100b,Skp1,Traf6,Uba52,Ubb,Mapk7,Dusp4,Map2k3,Map2k4,Map2k6,Map2k7,Map3k7,Map3k8,Mapk1,Mapk10,Mapk14,Mapk3,Mapk8,Mapk9,Ecsit,Cul1,Ube2n,Peli2,Ripk2
MyD88 dependent cascade initiated on endosome	2.00982	0.0156239	Tab1,Ube2v1,Peli1,Tnip2,Dusp6,Tab2,Vrk3,Nkiras1,Mapkapk3,Fbxw11,Dusp7,Nkiras2,Dusp3,Rps6ka5,Ticam1,Nod1,Irak2,App,Atf1,Atf2,Cd14,Rps27a,Creb1,Fos,Hmgb1,Ikbkb,Ikbkg,Irak1,Jun,Ly96,Mapkapk2,Nfkb1,Nfkb2,Nfkbia,Nfkbib,Ppp2r1a,Ppp2ca,Ppp2cb,Rela,S100b,Irf7,Skp1,Tlr4,Traf6,Uba52,Ubb,Mapk7,Dusp4,Map2k3,Map2k4,Map2k6,Map2k7,Map3k7,Map3k8,Mapk1,Mapk10,Mapk14,Mapk3,Mapk8,Mapk9,Ecsit,Cul1,Ube2n,Peli2,Ripk2
MyD88-independent TLR4 cascade	2.06614	0.0122953	Ube2d3,Tab1,Ube2v1,Tnip2,Dusp6,Tab2,Vrk3,Nkiras1,Mapkapk3,Fbxw11,Dusp7,Nkiras2,Dusp3,Rps6ka5,Ticam1,Nod1,Irak2,Birc3,Birc2,App,Atf1,Atf2,Casp8,Cd14,Rps27a,Creb1,Fadd,Fos,Hmgb1,Ikbkb,Ikbkg,Irak1,Jun,Ly96,Mapkapk2,Nfkb1,Nfkb2,Nfkbia,Nfkbib,Ppp2r1a,Ppp2ca,Ppp2cb,Ptpn11,Ube2d1,Rela,Ripk1,S100b,Tank,Irf7,Irf3,Skp1,Tlr4,Traf3,Traf6,Uba52,Ubb,Tbk1,Ikbke,Ripk3,Ube2d2a,Mapk7,Dusp4,Map2k3,Map2k4,Map2k6,Map…
MyD88:MAL(TIRAP) cascade initiated on plasma membrane	2.03884	0.0159382	Tab1,Ube2v1,Peli1,Tnip2,Dusp6,Tab2,Vrk3,Nkiras1,Mapkapk3,Fbxw11,Dusp7,Nkiras2,Dusp3,Rps6ka5,Nod1,Irak2,App,Atf1,Atf2,Rps27a,Creb1,Fos,Hmgb1,Ikbkb,Ikbkg,Irak1,Jun,Mapkapk2,Nfkb1,Nfkb2,Nfkbia,Nfkbib,Tirap,Ppp2r1a,Ppp2ca,Ppp2cb,Rela,S100b,Skp1,Traf6,Uba52,Ubb,Mapk7,Dusp4,Map2k3,Map2k4,Map2k6,Map2k7,Map3k7,Map3k8,Mapk1,Mapk10,Mapk14,Mapk3,Mapk8,Mapk9,Ecsit,Cul1,Ube2n,Peli2,Ripk2
Myogenesis	1.99182	0.0342533	Spag9,Abl1,Bnip2,Ctnna1,Ctnnb1,Cdc42,Mef2a,Mef2c,Mef2d,Myog,Boc,Tcf12,Tcf4,Tcf3,Cdon,Mapk14,Mapk12
N-glycan antennae elongation in the medial/trans-Golgi	2.08508	0.0283589	Mgat4c,Chst8,Mgat4b,Fuca1,Mgat4a,Man2a2,Mgat5,B4galt1,Man2a1,St6gal1,St3gal4,St8sia2,St8sia3,B4galt2,Fut8,Mgat2,B4galt5,B4galt4,B4galt6,B4galt3
NCAM signaling for neurite out-growth	3.10768	0.00181541	Rps6ka5,Col6a5,Col3a1,Col4a1,Col4a2,Col5a1,Col5a2,Col6a1,Col6a2,Creb1,Ptk2,Fyn,Grb2,Hras,Kras,Ncam1,Ptpra,St8sia2,St8sia4,Sos1,Sptbn1,Col5a3,Mapk1,Mapk3
Neddylation	1.73971	0.010903	Obsl1,Ube2d3,Commd4,Commd6,Commd5,Psmd6,Dda1,Cul7,Commd7,Cul4a,Lrrc41,Wdtc1,Psmd12,Psmd5,Fbxo44,Psmc6,Psmd9,Elob,Fbxo32,Fbxo21,Ube2f,Eloc,Dcun1d4,Fbxl15,Fbxl14,Fbxw9,Klhl42,Tulp4,Asb11,Psmd11,Commd10,Dcun1d2,Lrr1,Fbxo7,Dcun1d3,Fbxl19,Psmd1,Psme4,Fbxw11,Nae1,Kctd6,Fbxo9,Cul2,Klhl5,Dcaf7,Fbxo30,Btbd6,Cand1,Ercc8,Fbxo22,Fbxl20,Asb6,Cul4b,Fbxl4,Fbxo10,Fbxo4,Ccdc8,Dcaf4,Psmb11,Dcaf6,Fbxl22,Ankrd9,Spsb…
Negative epigenetic regulation of rRNA expression	3.11611	0.00181541	H4c17,H2aj,H4c8,H2az2,H3f3a,H3f3b,H2ac18,H2ax,Mbd2,H2az1,Suv39h1,H3c2,H4c11,H2ac10,H2bc11,H2bc3,H2bc21,Sirt1,H4c14,H3c1
Negative regulation of FGFR1 signaling	2.51858	0.00499622	Frs2,Braf,Cbl,Rps27a,Fgf2,Fgf9,Fgfr1,Grb2,Mknk1,Ppp2r1a,Ppp2ca,Ppp2cb,Ptpn11,Src,Uba52,Ubb,Spry2,Mapk1,Mapk3
Negative regulation of FGFR2 signaling	2.57441	0.00385611	Frs2,Braf,Cbl,Rps27a,Fgf2,Fgf7,Fgf9,Fgfr2,Grb2,Mknk1,Ppp2r1a,Ppp2ca,Ppp2cb,Ptpn11,Src,Uba52,Ubb,Spry2,Mapk1,Mapk3
Negative regulation of FGFR3 signaling	2.4816	0.00744356	Frs2,Braf,Cbl,Rps27a,Fgf2,Fgf9,Grb2,Mknk1,Ppp2r1a,Ppp2ca,Ppp2cb,Ptpn11,Src,Uba52,Ubb,Spry2,Mapk1,Mapk3
Negative regulation of FGFR4 signaling	2.43114	0.0074782	Frs2,Braf,Cbl,Rps27a,Fgf15,Fgf2,Fgf9,Grb2,Mknk1,Ppp2r1a,Ppp2ca,Ppp2cb,Ptpn11,Src,Uba52,Ubb,Spry2,Mapk1,Mapk3
Negative regulation of MAPK pathway	2.95724	0.00181541	Dusp6,Dusp16,Dusp7,Brap,Dusp5,Braf,Araf,Raf1,Rps27a,Hras,Kras,Ksr1,Mark3,Dusp8,Ppp2r1a,Ppp2ca,Ppp2cb,Ppp5c,Dusp1,Ptpn3,Ywhab,Uba52,Ubb,Pebp1,Dusp4,Map2k1,Map2k2,Mapk1,Mapk3,Ppp2r5c,Ppp2r5e,Ppp2r5b,Mapk12,Ppp2r5a,Dusp10
Nervous system development	3.35652	0.00181541	Frs2,Psenen,Actr2,Cltc,Pdlim7,Arpc5,Plxnd1,Tubb6,Arpc4,Dock1,Arhgap35,Ap2s1,Itga9,Plxnb1,Ap2b1,Usp33,Rps6ka5,Wasl,Ephb1,Tubb2b,Actr3,Tubal3,Pik3cb,Col6a5,Arpc2,Abl1,Actb,Actg1,Aph1b,Ap2a1,Ap2a2,Ap2m1,Rhoa,Rhob,Rhoc,Arpc1b,Artn,Rap1gap,Arhgef28,Cdc42,Cdk5,Rps27a,Cxcr4,Col3a1,Col4a1,Col4a2,Col5a1,Col5a2,Col6a1,Col6a2,Creb1,Crmp1,Dpysl2,Csnk2a1,Csnk2a2,Csnk2b,Dab1,Dag1,Dnm1,Dnm2,Dok1,Dok2,Efna1,Efna…
Netrin-1 signaling	1.84974	0.0457451	Dock1,Wasl,Cdc42,Ptk2,Fyn,Nck1,Ntn1,Rac1,Siah1a,Siah2,Src,Ezr,Ntn4,Mapk13,Mapk14,Mapk8,Trio,Mapk12
Neutrophil degranulation	3.97276	0.0020042	Defa34,Defa40,Defa41,Serpinb1a,Psmd6,Lamtor1,Serpinb3d,Ormdl3,Pgm2,Actr2,Pycard,Fuca2,Dsn1,Psmd12,Magt1,Cmtm6,Bpi,Snap29,Agpat2,Plac8,Aldh3b1,Tmem179b,Arpc5,Ilf2,Slc15a4,2310033P09Rik,1600012H06Rik,Npc2,Pdap1,Ndufc2,Rab14,Dera,Slc44a2,Arl8a,Mgam,Cd177,Psmd11,Ubr4,Gsdmd,Mcemp1,Siglecf,Dnase1l1,Bst2,Cdk13,Tmbim1,Plekho2,Tmem30a,Cpne1,Mettl7a1,Psmd1,Copb1,Unc13d,Atp6ap2,Cpne3,Arhgap45,AY761185,Qsox1…
NIK-->noncanonical NF-kB signaling	2.62936	0.00338631	Psmd6,Psmd12,Psmd5,Psmc6,Psmd9,Psmd11,Psmd1,Psme4,Fbxw11,Psmb11,Rps27a,Psmb9,Psmb8,Psmd7,Nfkb2,Psma2,Psma3,Psmb1,Psmb10,Psmb4,Psmb5,Psmb6,Psmb7,Psmc1,Psmc2,Psmc3,Psmc5,Psmd4,Psme1,Psme2,Psme3,Relb,Psmd10,Map3k14,Skp1,Psmd2,Psmd3,Uba52,Ubb,Ube2m,Uba3,Psmc4,Psmd13,Psmd8,Psmd14,Psma1,Psma4,Psma5,Psma6,Psma7,Psmb2,Psmb3,Cul1,Psmf1
Non-integrin membrane-ECM interactions	2.57573	0.0023517	Ddr1,Col11a2,Col3a1,Col4a1,Col4a2,Col5a1,Col5a2,Col1a1,Col1a2,Fgf2,Fn1,Sdc2,Hspg2,Itga2,Itga6,Itgav,Itgb1,Itgb3,Itgb5,Ddr2,Pdgfa,Pdgfb,Prkca,Sdc1,Sdc3,Sdc4,Col5a3,Tgfb1,Itgb4
Nonsense Mediated Decay (NMD) enhanced by the Exon Junction Complex (EJC)	5.05875	0.00181541	Smg5,Rpl3l,Magohb,Rps23,Rps21,Rpl15,Rpl36al,Rpl35,Rpl11,Upf3a,Rps10,Rpl14,Rplp2,Rpl37,Rps20,Rpl38,Rpl4,Rps27l,Rpl22l1,Rps13,Ncbp2,Upf3b,Rpl39l,Rpl24,Rpl34,Smg1,Rps15a,Smg6,Rpl5,Rpl23a,Ppp2r2a,Smg9,Rpl12,Ncbp1,Rpl13,Smg8,Rps25,Dcp1a,Rpl18a,Rps9,Rplp0,Eif4g1,Rpl10,Gspt1,Rpl31,Rpsa,Rps2,Magoh,Pabpc1,Ppp2r1a,Ppp2ca,Upf1,Rnps1,Rpl18,Rpl19,Rpl22,Rpl26,Rpl27,Rpl28,Rpl29,Rpl37a,Rpl36a,Rpl6,Rpl7,Rpl9,Rps1…
Nonsense Mediated Decay (NMD) independent of the Exon Junction Complex (EJC)	5.46756	0.00181541	Rpl3l,Rps23,Rps21,Rpl15,Rpl36al,Rpl35,Rpl11,Rps10,Rpl14,Rplp2,Rpl37,Rps20,Rpl38,Rpl4,Rps27l,Rpl22l1,Rps13,Ncbp2,Rpl39l,Rpl24,Rpl34,Rps15a,Rpl5,Rpl23a,Rpl12,Ncbp1,Rpl13,Rps25,Rpl18a,Rps9,Rplp0,Eif4g1,Rpl10,Gspt1,Rpl31,Rpsa,Rps2,Pabpc1,Upf1,Rpl18,Rpl19,Rpl22,Rpl26,Rpl27,Rpl28,Rpl29,Rpl37a,Rpl36a,Rpl6,Rpl7,Rpl9,Rps14,Rps15,Rps16,Rps17,Rps18,Rps19,Rps24,Rps29,Rps3a1,Rps4x,Rps5,Rps6,Rps7,Rps8,Rps28,Rp…
Nonsense-Mediated Decay (NMD)	5.05875	0.00181541	Smg5,Rpl3l,Magohb,Rps23,Rps21,Rpl15,Rpl36al,Rpl35,Rpl11,Upf3a,Rps10,Rpl14,Rplp2,Rpl37,Rps20,Rpl38,Rpl4,Rps27l,Rpl22l1,Rps13,Ncbp2,Upf3b,Rpl39l,Rpl24,Rpl34,Smg1,Rps15a,Smg6,Rpl5,Rpl23a,Ppp2r2a,Smg9,Rpl12,Ncbp1,Rpl13,Smg8,Rps25,Dcp1a,Rpl18a,Rps9,Rplp0,Eif4g1,Rpl10,Gspt1,Rpl31,Rpsa,Rps2,Magoh,Pabpc1,Ppp2r1a,Ppp2ca,Upf1,Rnps1,Rpl18,Rpl19,Rpl22,Rpl26,Rpl27,Rpl28,Rpl29,Rpl37a,Rpl36a,Rpl6,Rpl7,Rpl9,Rps1…
NoRC negatively regulates rRNA expression	3.28691	0.00181541	H4c17,H2aj,H4c8,H2az2,H3f3a,H3f3b,H2ac18,H2ax,Mbd2,H2az1,H3c2,H4c11,H2ac10,H2bc11,H2bc3,H2bc21,H4c14,H3c1
Norepinephrine Neurotransmitter Release Cycle	-1.76041	0.0268616	Ppfia2,Ppfia4,Ppfia1,Tspoap1,Ppfia3,Maoa,Slc18a2,Rab3a,Slc22a1,Slc22a2,Stx1a,Stxbp1,Syt1,Unc13b,Vamp2
NOTCH3 Activation and Transmission of Signal to the Nucleus	1.83886	0.042954	Psenen,Wwp2,Adam10,Aph1b,Rps27a,Dll1,Egfr,Jag1,Jag2,Psen2,Dll4,Uba52,Ubb,Ybx1,Ncstn,Aph1a
Nuclear Events (kinase and transcription factor activation)	2.11383	0.0262577	Dusp6,Vrk3,Dusp7,Dusp3,Rps6ka5,Chd4,Atf1,Creb1,Mapkapk2,Nab2,Ppp2r1a,Ppp2ca,Ppp2cb,Sgk1,Srf,Mapk7,Dusp4,Mapk1,Mapk14,Mapk3
Olfactory Signaling Pathway	-3.61594	0.00181541	Olfr78,Gnal,Gnb1,Olfr15,Olfr31,Olfr263,Olfr735,Olfr1016,Olfr222,Olfr417,Olfr845,Olfr745,Olfr918,Olfr1512,Olfr933,Olfr307,Olfr411,Olfr414,Olfr508,Olfr273,Olfr147,Olfr376,Olfr172,Olfr173,Olfr1047,Olfr1044,Olfr558,Olfr979,Olfr723,Gng13
Opioid Signalling	2.06453	0.0159382	Gng11,Adcy3,Adcy4,Adcy1,Pde4d,Camkk2,Adcy6,Adcy7,Adcy8,Adcy9,Grk2,Pde4c,Calm1,Calm2,Calm3,Cdk5,Gnat3,Gna11,Gna14,Gnai1,Gnai2,Gnai3,Gnal,Gnaq,Gnb1,Gnb2,Gnb4,Gnb5,Gng10,Gng2,Gng4,Gng5,Gngt2,Pde1a,Pde1b,Pde1c,Pde4a,Pde4b,Prkaca,Prkacb,Prkca,Prkcd,Pla2g4a,Plcb1,Plcb2,Plcb3,Plcb4,Pomc,Ppp2r1a,Ppp1ca,Ppp1r1b,Ppp2ca,Ppp2cb,Prkar1a,Prkar1b,Prkar2b,Camkk1,Mapk1,Adcy5,Gng13
Organelle biogenesis and maintenance	2.10092	0.00181541	Atp5d,Cep152,Exoc2,Haus6,Ift27,Dynlrb1,Atp5e,Sclt1,Nde1,Dynlt2a3,Haus3,Ift22,Tctn3,Ift172,Ift74,Atp5g2,Tubb6,Tctn2,Dmac2l,Dynll2,Arl13b,Akap9,Ift80,Sirt5,Ssna1,Tmem216,Ccp110,Mark4,B9d2,Exoc8,Dctn2,Exoc1,Cep192,Tubg1,Bbip1,Cngb1,Bbs7,Csnk1d,Atp5h,Haus5,Cep89,Ttc30b,Alms1,Bbs5,Exoc5,Hspb11,Atat1,Idh2,Ofd1,Ttc21b,Tubb2b,Haus7,Ift140,Ift57,Traf3ip1,Nphp3,Unc119b,Cep97,Cep57,Cep72,Gbf1,Tubal3,Tnpo1,T…
Oxidative Stress Induced Senescence	3.15225	0.00181541	H4c17,H2aj,H4c8,Mapkapk3,Tnik,H2az2,Bmi1,Cbx4,Phc3,Cdk4,Cdk6,Cdkn2b,Rps27a,Phc1,Eed,Ezh2,Fos,H3f3a,H3f3b,H2ac18,H2ax,Rbbp7,Jun,Mapkapk2,Mapkapk5,Mdm2,Mdm4,Mink1,H2az1,Rbbp4,Ring1,Rnf2,Suz12,Kdm6b,Phc2,Trp53,Txn1,Uba52,Ubb,H3c2,H4c11,H2ac10,H2bc11,H2bc3,H2bc21,Map2k3,Map2k4,Map2k6,Map2k7,Map3k5,Mapk1,Mapk10,Mapk14,Mapk3,Mapk8,Mapk9,Map4k4,Scmh1,Cbx8,H4c14,H3c1
Oxygen-dependent proline hydroxylation of Hypoxia-inducible Factor Alpha	2.59051	0.00413536	Ube2d3,Psmd6,Psmd12,Psmd5,Psmc6,Psmd9,Elob,Eloc,Wtip,Psmd11,Psmd1,Psme4,Cul2,Psmb11,Rps27a,Epas1,Egln1,Egln3,Egln2,Hif1a,Psmb9,Psmb8,Psmd7,Psma2,Psma3,Psmb1,Psmb10,Psmb4,Psmb5,Psmb6,Psmb7,Psmc1,Psmc2,Psmc3,Psmc5,Psmd4,Psme1,Psme2,Psme3,Ube2d1,Psmd10,Hif3a,Psmd2,Psmd3,Uba52,Ubb,Vhl,Rbx1,Ube2d2a,Psmc4,Psmd13,Psmd8,Psmd14,Psma1,Psma4,Psma5,Psma6,Psma7,Psmb2,Psmb3,Limd1,Psmf1
p53-Dependent G1 DNA Damage Response	2.17176	0.0094283	Psmd6,Psmd12,Psmd5,Psmc6,Psmd9,Psmd11,Psmd1,Psme4,Psmb11,Atm,Ccne1,Ccne2,Cdk2,Cdkn1a,Cdkn1b,Rps27a,Psmb9,Psmb8,Mdm2,Mdm4,Psmd7,Chek2,Psma2,Psma3,Psmb1,Psmb10,Psmb4,Psmb5,Psmb6,Psmb7,Psmc1,Psmc2,Psmc3,Psmc5,Psmd4,Psme1,Psme2,Psme3,Psmd10,Psmd2,Trp53,Psmd3,Uba52,Ubb,Psmc4,Psmd13,Psmd8,Psmd14,Cop1,Psma1,Psma4,Psma5,Psma6,Psma7,Psmb2,Psmb3,Zfp385a,Psmf1,Phf20
p53-Dependent G1/S DNA damage checkpoint	2.17176	0.0094283	Psmd6,Psmd12,Psmd5,Psmc6,Psmd9,Psmd11,Psmd1,Psme4,Psmb11,Atm,Ccne1,Ccne2,Cdk2,Cdkn1a,Cdkn1b,Rps27a,Psmb9,Psmb8,Mdm2,Mdm4,Psmd7,Chek2,Psma2,Psma3,Psmb1,Psmb10,Psmb4,Psmb5,Psmb6,Psmb7,Psmc1,Psmc2,Psmc3,Psmc5,Psmd4,Psme1,Psme2,Psme3,Psmd10,Psmd2,Trp53,Psmd3,Uba52,Ubb,Psmc4,Psmd13,Psmd8,Psmd14,Cop1,Psma1,Psma4,Psma5,Psma6,Psma7,Psmb2,Psmb3,Zfp385a,Psmf1,Phf20
p53-Independent DNA Damage Response	2.27418	0.00684351	Psmd6,Psmd12,Psmd5,Psmc6,Psmd9,Psmd11,Psmd1,Psme4,Psmb11,Cdc25a,Chek1,Rps27a,Psmb9,Psmb8,Psmd7,Chek2,Psma2,Psma3,Psmb1,Psmb10,Psmb4,Psmb5,Psmb6,Psmb7,Psmc1,Psmc2,Psmc3,Psmc5,Psmd4,Psme1,Psme2,Psme3,Psmd10,Psmd2,Psmd3,Uba52,Ubb,Psmc4,Psmd13,Psmd8,Psmd14,Psma1,Psma4,Psma5,Psma6,Psma7,Psmb2,Psmb3,Psmf1
p53-Independent G1/S DNA damage checkpoint	2.27418	0.00684351	Psmd6,Psmd12,Psmd5,Psmc6,Psmd9,Psmd11,Psmd1,Psme4,Psmb11,Cdc25a,Chek1,Rps27a,Psmb9,Psmb8,Psmd7,Chek2,Psma2,Psma3,Psmb1,Psmb10,Psmb4,Psmb5,Psmb6,Psmb7,Psmc1,Psmc2,Psmc3,Psmc5,Psmd4,Psme1,Psme2,Psme3,Psmd10,Psmd2,Psmd3,Uba52,Ubb,Psmc4,Psmd13,Psmd8,Psmd14,Psma1,Psma4,Psma5,Psma6,Psma7,Psmb2,Psmb3,Psmf1
PCP/CE pathway	2.56115	0.00181541	Smurf2,Psmd6,Psmd12,Psmd5,Psmc6,Psmd9,Cltc,Ap2s1,Psmd11,Psmd1,Psme4,Ap2b1,Rac3,Psmb11,Cltb,Smurf1,Ap2a1,Ap2a2,Ap2m1,Rhoa,Daam1,Rps27a,Dvl1,Dvl2,Dvl3,Fzd1,Fzd4,Fzd5,Fzd6,Fzd8,Psmb9,Psmb8,Psmd7,Pfn1,Prkca,Psma2,Psma3,Psmb1,Psmb10,Psmb4,Psmb5,Psmb6,Psmb7,Psmc1,Psmc2,Psmc3,Psmc5,Psmd4,Psme1,Psme2,Psme3,Rac1,Rac2,Arrb2,Psmd10,Psmd2,Psmd3,Uba52,Ubb,Wnt11,Wnt5a,Pard6a,Psmc4,Psmd13,Fzd2,Psmd8,Psmd14,Psma…
Peptide hormone metabolism	2.13233	0.014768	Sec11c,Exoc2,Spcs2,Ero1b,Spcs1,Slc30a5,Ffar1,Exoc8,Exoc1,Ace2,Atp6ap2,Aopep,Exoc5,Ffar4,Spcs3,Ace,Bche,Cpa3,Ctsd,Gnat3,Dpp4,Slc30a6,Enpep,Gcg,Gip,Gnb1,Exoc3,Igf1,Inha,Inhba,Inhbb,Inhbe,Lep,Cma1,Mme,Ero1a,Pcsk1,Pomc,Ren1,Exoc4,Exoc7,Sec11a,Pla2g7,Grp,Ctsz,Gng13
Peptide ligand-binding receptors	-2.80576	0.00181541	Cxcl16,Prlh,Ece1,Nts,Gpr37l1,Rxfp2,Rxfp3,Nln,Agtr1a,App,Bdkrb1,Bdkrb2,C3,C3ar1,C5ar1,Npb,Cck,Rxfp4,Cxcr3,Cxcr4,Ccr9,Ccr4,Ccr5,Ccr8,Ccr10,Ackr3,Cort,Cx3cr1,Edn1,Edn2,Edn3,Ednra,Ednrb,F2r,F2rl1,F2rl2,Fpr2,Fpr-rs3,Fpr1,Gal,Nmur1,Cxcl1,Hcrt,Cxcr6,Rln3,Kiss1r,Anxa1,Mc2r,Mc3r,Prok2,Nmbr,Kiss1,Npy1r,Npy2r,Npy5r,Ntsr1,Oprd1,Oprk1,Oprl1,Oxt,Oxtr,Penk,Ccl21a,Pomc,Psap,Nmur2,Ccl12,Ccl22,Ccl25,Ccl27a,Ccl4,Cc…
Phase II - Conjugation of compounds	1.79948	0.0416776	Cndp2,Mgst3,Ugt1a1,Ugt1a7c,Ugt1a5,Trmt112,N6amt1,Ugt2b34,Chac2,Mat2a,Gstm7,Chac1,Sult1c2,Ggt6,Ahcy,Mtr,Glyatl3,Oplah,Mat2b,Slc35b3,Gstk1,Ggct,Comt,Bpnt2,Slc35d1,Mtrr,Slc26a2,Ugt2b35,Esd,Ggt1,Gclc,Gclm,Gss,Gsta3,Gstm1,Gstm2,Gstm3,Gstm4,Gstm5,Gstm6,Gstp1,Gstt1,Gstt2,Gsto1,Gstz1,Mgst2,Abhd10,Nat2,Nat3,Nnmt,Ugp2,Sult2b1,Hpgds,Tpmt,Tpst1,Tpst2,Ugdh,Sult1b1,Bpnt1,Mgst1,Ggt5,Papss1,Papss2,As3mt,Akr1a1,U…
PI Metabolism	1.74879	0.047748	Tnfaip8l1,Pi4k2b,Plekha8,Rab14,Plekha1,Tnfaip8l2,Fig4,Inpp4b,Vac14,Pik3r6,Mtmr12,Mtmr4,Inpp5j,Inpp4a,Tnfaip8,Mtmr3,Pik3cb,Rab5a,Pi4kb,Pip4k2b,Pik3r4,Plekha5,Plekha6,Pik3c2b,Mtmr2,Arf1,Arf3,Bmx,Sbf1,Mtmr9,Tnfaip8l3,Inpp5d,Mtm1,Plekha3,Plekha2,Sacm1l,Pnpla6,Pi4k2a,Pik3c2a,Pik3c2g,Pik3ca,Pik3cd,Pik3r1,Pik3r2,Pik3r3,Pikfyve,Pip5k1c,Pip4k2a,Pip5k1b,Pip5k1a,Pip4k2c,Inpp5k,Pten,Ptpn13,Rab4a,Rufy1,Mtmr1,…
PINK1-PRKN Mediated Mitophagy	2.03948	0.0302629	Tomm6,Tomm7,Map1lc3a,Mfn1,Map1lc3b,Atg12,Tomm20,Tomm5,Pink1,Mfn2,Atg5,Sqstm1,Tomm40,Vdac1,Tomm22,Tomm70a
PIP3 activates AKT signaling	2.38656	0.00181541	Phlpp1,Frs2,Gatad2b,Lamtor4,Psmd6,Lamtor1,Sall4,Wwp2,Psmd12,Psmd5,Psmc6,Psmd9,Akt1s1,Foxo6,Rnf146,Rraga,Lamtor5,Maf1,Psmd11,Irak4,Psmd1,Gatad2a,Psme4,Epgn,Slc38a9,Strn,Otud3,Hdac1,Psmb11,Tnks2,Pik3cb,Chd4,Pip4k2b,Them4,Prr5,Prex2,Il33,Akt1,Akt2,Xiap,Areg,Bmi1,Casp9,Cbx4,Cd86,Phc3,Cdkn1a,Cdkn1b,Rps27a,Creb1,Csnk2a1,Csnk2a2,Csnk2b,Rictor,Phc1,Eed,Egfr,Erbb2,Ereg,Mecom,Ezh2,Fgf15,Fgf2,Fgf7,Fgf9,Fgfr…
PKMTs methylate histone lysines	2.19866	0.012112	Setd6,Dpy30,H4c17,Kmt5a,Kmt5c,Kmt2e,H4c8,Smyd3,Setd1a,Nsd3,Prdm16,Setd2,Setd7,Nsd2,Wdr5,Kmt2b,Setd1b,Aebp2,Dot1l,Ehmt2,Ehmt1,Eed,Mecom,Ezh2,Rbbp7,Rbbp5,Nfkb1,Nfkb2,Rbbp4,Rela,Suz12,Setd3,Suv39h1,Atf7ip,Ash2l,H3c2,H4c11,Ash1l,Kmt5b,Smyd2,H4c14,Suv39h2,H3c1
Plasma lipoprotein assembly	2.78945	0.00181541	Sar1b,Apob,Abca1,Apoc4,Apoa1,Apoa4,Apoc1,Apoc2,Apoc3,Apoe,Bmp1,Mttp,P4hb,Prkaca,Prkacb,Zdhhc8
Plasma lipoprotein assembly, remodeling, and clearance	3.33514	0.00181541	Sar1b,Ldlrap1,Cltc,Pcsk9,Npc2,Ap2s1,Ap2b1,Lmf2,Apob,Lmf1,Abca1,Abcg1,Apoc4,Ap2a1,Ap2a2,Ap2m1,Apoa1,Apoa4,Apoc1,Apoc2,Apoc3,Apoe,Bmp1,Hdlbp,Ldlr,Lipa,Mttp,Npc1,P4hb,Furin,Pcsk5,Pcsk6,Prkaca,Prkacb,Pltp,Soat1,Scarb1,Mylip,Nr1h3,Nr1h2,Angptl4,Nceh1,Soat2,Zdhhc8
Plasma lipoprotein clearance	2.86229	0.00181541	Ldlrap1,Cltc,Pcsk9,Npc2,Ap2s1,Ap2b1,Apob,Apoc4,Ap2a1,Ap2a2,Ap2m1,Apoa1,Apoc1,Apoe,Hdlbp,Ldlr,Lipa,Npc1,Soat1,Scarb1,Mylip,Nr1h3,Nr1h2,Nceh1,Soat2
Plasma lipoprotein remodeling	2.93248	0.00181541	Lmf2,Apob,Lmf1,Abcg1,Apoa1,Apoa4,Apoc2,Apoc3,Apoe,Mttp,P4hb,Furin,Pcsk5,Pcsk6,Pltp,Angptl4
Platelet activation, signaling and aggregation	3.48991	0.00181541	Gng11,Abhd6,Nhlrc2,Ola1,Cdc37l1,Tmx3,Daglb,Chid1,Apool,P2ry12,Plcg2,Mmrn1,Qsox1,Dgkz,Rarres2,Pik3r6,Endod1,Cyb5r1,Brpf3,Dagla,Ly6g6f,Mpig6b,Serpina3f,Pik3cb,Spp2,Abcc4,Abhd12,Sccpdh,Pcyox1l,Arrb1,Actn1,Actg1,Adra2a,Adra2c,Rap1a,Akt1,Aldoa,Anxa5,Aplp2,Apoa1,Apoh,App,Rhoa,Raf1,Rhob,Dgkg,Dgkq,Serping1,Calm1,Calm2,Calm3,Cd36,Cd63,Cd9,Cdc42,Clu,Col1a1,Col1a2,Bcar1,Crk,Csk,Ctsw,Dgka,Gnat3,Lefty1,Ecm1,F…
Platelet Aggregation (Plug Formation)	2.00274	0.0352347	Adra2a,Adra2c,Rap1a,Akt1,Col1a1,Col1a2,Bcar1,Crk,Csk,Ptk2,Fn1,Gp1bb,Grb2,Itga2b,Itgb3,Pdpk1,Rap1b,Ptpn1,Rasgrp2,Shc1,Sos1,Src,Syk,Apbb1ip,Tln1,Vwf,Rapgef3
Platelet calcium homeostasis	1.9514	0.0393585	P2rx2,Atp2b1,Sri,Atp2a1,Atp2a2,Atp2b2,Calm1,Calm2,Calm3,Itpr1,Itpr2,Itpr3,P2rx1,P2rx7,P2rx6,Slc8a1,Atp2a3,Atp2b4,P2rx5
Platelet degranulation	3.47869	0.00181541	Nhlrc2,Ola1,Cdc37l1,Tmx3,Chid1,Apool,Mmrn1,Qsox1,Rarres2,Endod1,Cyb5r1,Brpf3,Ly6g6f,Serpina3f,Spp2,Abcc4,Sccpdh,Pcyox1l,Actn1,Actg1,Aldoa,Anxa5,Aplp2,Apoa1,Apoh,App,Serping1,Calm1,Calm2,Calm3,Cd36,Cd63,Cd9,Clu,Ctsw,Lefty1,Ecm1,Fn1,Gas6,Rab27b,Hgf,Maged2,Igf1,Igf2,Itga2b,Itgb3,Lamp2,Orm1,Orm2,Pdgfa,Pdgfb,Pecam1,Lgals3bp,Srgn,Pros1,Psap,Tmsb4x,A1bg,Selp,Selenop,Sod1,Sparc,Serpina3g,Stxbp2,Pcdh7,Tex…
Platelet homeostasis	2.05722	0.0181622	Gng11,Pafah2,P2rx2,Atp2b1,Apob,Pde2a,Sri,Atp2a1,Atp2a2,Atp2b2,Pde11a,Calm1,Calm2,Calm3,Pde5a,Fgr,Gnas,Gnb1,Gnb2,Gnb4,Gnb5,Gng10,Gng2,Gng4,Gng5,Gngt2,Ptpn6,Itpr1,Itpr2,Itpr3,Irag1,Nos2,Nos3,P2rx1,P2rx7,P2rx6,Pde1a,Pde1b,Pde9a,Pecam1,Pla2g4a,Ppp2r1a,Ppp2ca,Ppp2cb,Prkg1,Ptpn11,Slc8a1,Atp2a3,Atp2b4,Mapk14,Ppp2r5c,Ppp2r5e,P2rx5,Ppp2r5b,Ppp2r5a,Gng13
Positive epigenetic regulation of rRNA expression	2.26795	0.0086874	Polr1h,Polr2e,Ep300,Polr2l,H4c17,H2aj,H4c8,Polr2f,Taf1d,Actb,Dek,H2az2,Kat2a,H3f3a,H3f3b,H2ac18,H2ax,Polr2h,Polr2k,Myo1c,Mybbp1a,Kat2b,H2az1,Polr1c,Polr1b,Polr1a,Taf1a,Taf1b,Taf1c,Tbp,Baz1b,Ddx21,Gsk3b,H3c2,H4c11,H2ac10,H2bc11,H2bc3,H2bc21,Ercc6,Polr1f,Smarca5,H4c14,Polr1e,H3c1
Post-translational modification: synthesis of GPI-anchored proteins	-2.05746	0.00414924	Pigl,Pigyl,Pigv,Pigc,Pigm,Pigk,Nrn1,Dpm3,Opcml,Spaca4,Lypd8,Pigw,Cpm,Nrn1l,Pigx,Psg21,Xpnpep2,Lypd1,Rtn4rl2,Ntng2,Pigg,Pigz,Ly6k,Plet1,Alpi,Alpl,Art3,Art4,Pgap1,Pigh,Bst1,Pigt,Dpm1,Dpm2,Pigs,Gpaa1,Pigq,Sprn,Ly6g6d,Psg25,Ly6d,Ly6e,Piga,Pigf,Plaur,Reck,Gm5155,Psg27,Thy1,Vnn1,Pigb,Msln,Pigp,Cd52,Prss21,Negr1,Psg19
Post-translational protein phosphorylation	3.4495	0.00181541	Bpifb2,Fuca2,Pnpla2,Shisa5,Pcsk9,Eva1a,Apol11a,Qsox1,Pdia6,Apol9b,Ltbp1,Mgat4a,Golm1,Apob,Mxra8,Spp2,Apol8,Apol7a,Apol7c,Mia3,Prss23,Adam10,Amelx,Aplp2,Apoa1,Apoe,App,Fam20a,Bmp4,C3,C4b,Calu,Chgb,Cp,Csf1,Cst3,Sparcl1,Fbn1,Fn1,Fstl1,Gas6,Fam20c,Sdc2,Apol10a,Ccn1,Igfbp3,Igfbp4,Igfbp5,Il6,Itih2,Ktn1,Lamb1,Lamb2,Lgals1,Matn3,Men1,Mfge8,Fstl3,Nucb1,P4hb,Penk,Prkcsh,Proc,Ckap4,Rcn1,Scg2,Tnc,Hsp90b1,Trf…
PRC2 methylates histones and DNA	3.00624	0.00181541	H4c17,H2aj,H4c8,Aebp2,H2az2,Dnmt1,Dnmt3a,Eed,Ezh2,H3f3a,H3f3b,H2ac18,H2ax,Rbbp7,Jarid2,Mtf2,H2az1,Rbbp4,Suz12,Phf1,H3c2,H4c11,H2ac10,H2bc11,H2bc3,H2bc21,H4c14,H3c1
Presynaptic phase of homologous DNA pairing and strand exchange	-2.23812	0.00218485	Dna2,Rpa3,Rpa1,Rfc3,Topbp1,Atrip,Rfc5,Rfc4,Rmi1,Atm,Blm,Brca2,Chek1,Hus1,Kat5,Mre11a,Rad1,Rad17,Rad51b,Rad51d,Rad9a,Rfc2,Top3a,Wrn,Exo1,Nbn,Rmi2,Rbbp8
Processing of Capped Intron-Containing Pre-mRNA	1.7881	0.00728274	Hnrnpf,Sf3b6,Cwc15,Lsm7,Ppih,Sarnp,Sf3b5,Clp1,Thoc7,Snw1,Lsm5,Polr2e,Magohb,Polr2l,Chtop,Snrnp40,Snrnp27,Ctnnbl1,Rae1,Prpf38a,Rbm22,Crnkl1,Fip1l1,Zmat5,Zcrb1,Nupl2,Rnpc3,Cwc27,Snrpd3,Cstf1,Ppil4,Xab2,Sf3a1,Cwc25,Polr2b,Ccar1,Lsm3,Polr2g,Snrnp48,Puf60,U2surp,Srsf6,Snrpg,Bud31,Ncbp2,Upf3b,Bcas2,Sympk,Nudt21,Gcfc2,Ddx39a,Phf5a,Syf2,Dnajc8,Gtf2f2,Ppil1,Prpf6,Snrpa1,Prpf31,Hnrnpul1,Sf3b3,Dhx16,Srsf11,…
Programmed Cell Death	3.16076	0.00181541	Chmp4c,Diablo,Chmp3,Oma1,Peli1,Dynll2,Chmp2b,Chmp2a,Gsdmd,Tradd,Chmp7,Clspn,Appl1,Bmf,Ticam1,Dnm1l,Opa1,Aven,Mlkl,Ogt,Chmp4b,Dsp,Chmp6,Add1,Apaf1,Birc3,Birc2,Xiap,Bad,Bak1,Bax,Bcl2,Bcl2l1,Bid,Bcl2l11,Bmx,Casp1,Casp4,Casp3,Casp6,Casp7,Casp8,Casp9,Ctnnb1,Cd14,Cdc37,Cdh1,Cflar,Rps27a,Cycs,Dbnl,Dffa,Dsg2,Fadd,Ptk2,Fas,Flot1,Flot2,Fnta,Gzmb,H1f3,H1f0,Hmgb1,H1f1,Hsp90aa1,Il1a,Il1b,Kpnb1,Kpna1,Lmna,Lmnb…
Protein folding	2.61614	0.0023517	Gng11,Pdcl,Cct2,Cct3,Cct4,Cct5,Cct6a,Cct7,Cct8,Csnk2a1,Csnk2a2,Csnk2b,Gna11,Gna14,Gnaq,Gnb1,Gnb2,Gnb4,Gnb5,Gng10,Gng2,Gng4,Gng5,Gngt2,Rgs9,Tcp1,Gng13
Protein localization	2.50951	0.00181541	Ube2d3,Fis1,Lonp2,Ndufb8,Nudt7,Atad1,Hscb,Pitrm1,Pex12,Pex1,Tysnd1,Coq2,Pex13,Acot8,Acot4,Pex26,Crot,Ehhadh,Acbd5,Ube2j2,Gstk1,Cyb5a,Acox1,Abcd1,Aldh3a2,App,Atp5b,Cat,Nudt19,Rps27a,Pex10,Pecr,Crat,Dao,Ephx2,Fxn,Gnpat,Hmgcl,Hmox1,Acox3,Hsd17b4,Hspd1,Paox,Idh1,Phyh,Amacr,Mpv17,Nos2,Otc,Pex11b,Pex16,Pex7,Ech1,Prnp,Pipox,Pex19,Abcd3,Pex5,Ube2d1,Sgta,Scp2,Sec61g,Slc25a17,Stx1a,Uba52,Ubb,Usp9x,Vamp2,Pe…
Protein methylation	2.35997	0.0107233	Mettl21a,Eef1akmt1,Eef2kmt,Prmt3,Eef1akmt2,Vcp,Camkmt,Vcpkmt,Calm1,Calm2,Calm3,Etfb,Eef2,Hspa8,Kin,Rps2,Etfbkmt
PTEN Regulation	2.8485	0.00181541	Gatad2b,Lamtor4,Psmd6,Lamtor1,Sall4,Wwp2,Psmd12,Psmd5,Psmc6,Psmd9,Rnf146,Rraga,Lamtor5,Maf1,Psmd11,Psmd1,Gatad2a,Psme4,Slc38a9,Otud3,Hdac1,Psmb11,Tnks2,Chd4,Prex2,Akt1,Akt2,Xiap,Bmi1,Cbx4,Phc3,Rps27a,Csnk2a1,Csnk2a2,Csnk2b,Phc1,Eed,Mecom,Ezh2,Frk,Hdac2,Rbbp7,Psmb9,Psmb8,Mbd3,Psmd7,Lamtor2,Nedd4,Mta3,Pml,Psma2,Psma3,Psmb1,Psmb10,Psmb4,Psmb5,Psmb6,Psmb7,Psmc1,Psmc2,Psmc3,Psmc5,Psmd4,Psme1,Psme2,Psm…
Pyroptosis	2.13365	0.0249604	Chmp4c,Chmp3,Chmp2b,Chmp2a,Gsdmd,Chmp7,Chmp4b,Chmp6,Bak1,Bax,Casp1,Casp4,Casp3,Cycs,Gzmb,Hmgb1,Il1a,Il1b,Gsdme
Pyruvate metabolism and Citric Acid (TCA) cycle	3.31828	0.00181541	D2hgdh,Sdhc,Sdhd,Sdha,Sdhb,Idh3a,Pdhb,Fahd1,Dlat,Idh3b,Pdk3,Idh2,Me2,Adhfe1,Aco2,Glo1,Bsg,Cs,Dld,Dlst,Fh1,Hagh,Gstz1,Slc16a3,Idh3g,Ldha,Ldhb,Ldhc,Me1,Mdh2,Ogdh,Pdha1,Pdha2,Pdk2,Ppard,Rxra,Slc16a1,Sucla2,Suclg2,L2hgdh,Pdp1,Pdp2,Vdac1,Suclg1,Pdpr,Pdhx,Pdk1
Rab regulation of trafficking	1.6439	0.0487638	Dennd4b,Rab3gap2,0610009B22Rik,Trappc2,Trappc5,Tbc1d15,Gapvd1,Trappc13,Trappc6a,Dennd1b,Map1lc3b,Dennd4c,Rab39b,Rab32,Ccz1,Tbc1d14,Rab13,Rab14,Tbc1d10b,Tbc1d17,Dennd6b,Dennd4a,Tbc1d13,Dennd1c,Tbc1d10a,Rab8b,Optn,Als2cl,Dennd2d,Rab38,Mon1a,Dennd3,Mon1b,Rab31,Als2,Rin2,Rab5a,Trappc8,Tbc1d10c,Rab1b,Trappc9,Tbc1d16,Denn2b,Akt1,Akt2,Arf6,Rab35,Rab27a,Sbf1,Chml,Trappc6b,Rgp1,Dennd2a,Tbc1d25,Gdi1,Gdi2,R…
RAC1 GTPase cycle	1.86101	0.0113057	Lbr,Vangl1,Arhgef39,Lamtor1,Plekhg3,Baiap2l1,Abi2,Arhgap24,Taok3,Arhgap25,Fgd5,Dock1,Wipf2,Brk1,Plekhg2,Arhgap32,Dock5,Arhgap35,Garre1,Arhgef18,Arap1,Vrk2,Chn2,Arhgef10,Arhgap17,Pak4,Arhgap45,Arhgap26,Arhgap21,Arhgap42,Cdc42ep1,Noxo1,Amigo2,Nckap1l,Wasl,Als2,Arap3,Arhgap22,Baiap2,Arhgap12,Mpp7,Dock11,Dock8,Prex2,Pkn2,Abi1,Cyfip2,Iqgap3,Abr,Arhgdib,Noxa1,Bcr,Cav1,Cdc42,Arhgap31,Cit,Arhgap10,Cyba,C…
RAC2 GTPase cycle	2.37716	0.00414924	Lbr,Vangl1,Lamtor1,Baiap2l1,Abi2,Taok3,Dock1,Brk1,Samm50,Arhgap32,Arhgap35,Garre1,Vrk2,Lman1,Arhgap17,Pak4,Pgrmc2,Arhgap26,Arhgap21,Arhgap42,Cdc42ep1,Armcx3,Ankle2,Nckap1l,Mpp7,Abi1,Abr,Bcr,Cav1,Cdc42,Cyba,Cybb,Wasf2,Dsg2,Dock10,Epha2,Prex1,Itgb1,Ncf1,Ncf2,Nckap1,Mcam,Pik3ca,Pik3r1,Pik3r2,Pik3r3,Pld2,Rab7,Rac2,Stbd1,Lemd3,Git1,Cyfip1,Swap70,Depdc1b,Tfrc,Vamp3,Vav1,Vav2,Diaph3,Def6,Cdc42ep4,Esyt1,…
RAC3 GTPase cycle	2.08873	0.0116377	Lbr,Vangl1,Lamtor1,Baiap2l1,Abi2,Taok3,Brk1,Arhgap32,Arhgap35,Garre1,Vrk2,Lman1,Arhgap17,Pak4,Pgrmc2,Arhgap26,Arhgap21,Arhgap42,Cdc42ep1,Noxo1,Rac3,Amigo2,Nckap1l,Arap3,Rapgef1,Baiap2,Mpp7,Abi1,Abr,Arhgap6,Arhgdib,Noxa1,Bcr,Cav1,Cdc42,Cyba,Cybb,Wasf2,Dsg2,Dock10,Epha2,Srgap2,Prex1,Itgb1,Jag1,Ncf1,Ncf2,Nckap1,Mcam,Pik3r1,Pik3r2,Rab7,Stbd1,Lemd3,Git1,Cyfip1,Snap23,Swap70,Depdc1b,Tfrc,Vamp3,Vav2,Fer…
RAF activation	3.10866	0.00181541	Brap,Camk2d,Braf,Araf,Raf1,Calm1,Calm2,Calm3,Camk2b,Camk2g,Hras,Jak2,Kras,Ksr1,Mark3,Mras,Phb,Ppp2r1a,Ppp1cb,Ppp1cc,Ppp2ca,Ppp2cb,Src,Ywhab,Shoc2,Map2k1,Map2k2,Map3k11,Ppp2r5c,Ppp2r5e,Ppp2r5b,Ppp2r5a
RAF/MAP kinase cascade	2.60536	0.00181541	Frs2,Psmd6,Psmd12,Psmd5,Psmc6,Psmd9,Dusp6,Wdr83,Spred3,Psmd11,Rasgrp4,Dab2ip,Abhd17c,Psmd1,Dusp16,Psme4,Dusp7,Epgn,Brap,Il17rd,Psmb11,Pik3cb,Camk2d,Syngap1,Rasgrp3,Dusp5,Arrb1,Actb,Actg1,Braf,Rap1a,Araf,Areg,Raf1,Artn,Bcl2l1,Zdhhc9,Fntb,Calm1,Calm2,Calm3,Camk2b,Camk2g,Rps27a,Csf2ra,Csk,Dlg1,Dlg4,Egfr,Erbb2,Ereg,Ptk2,Fgf15,Fgf2,Fgf7,Fgf9,Fgfr1,Fgfr2,Flt3l,Fn1,Fnta,Fyn,Gdnf,Gfra3,Gfra4,Kbtbd7,Grb2,…
RAS processing	2.5436	0.00385611	Abhd17c,Bcl2l1,Zdhhc9,Fntb,Calm1,Calm2,Calm3,Rps27a,Fnta,Hras,Kras,Pde6d,Lypla1,Abhd17a,Rce1,Uba52,Ubb,Arl2,Icmt,Golga7,Abhd17b
Recognition and association of DNA glycosylase with site containing an affected purine	2.00465	0.034046	H4c17,Pot1a,H2aj,H4c8,Neil3,Acd,H2az2,H2ac18,H2ax,Ogg1,H2az1,Terf1,Terf2,H4c11,H2ac10,H2bc11,H2bc3,H2bc21,Terf2ip,H4c14
Recruitment and ATM-mediated phosphorylation of repair and signaling proteins at DNA double strand breaks	2.05274	0.0235053	Kdm4a,H4c17,Babam1,H4c8,Rnf168,Ube2v2,Abraxas1,Nsd2,Babam2,Mdc1,Abl1,Apbb1,Atm,Rps27a,Eya3,Brcc3,Herc2,H2ax,Kat5,Mre11a,Chek2,Ppp5c,Uimc1,Trp53,Uba52,Ubb,Ube2i,Sumo1,Baz1b,H4c11,H2bc11,H2bc3,H2bc21,Rnf8,Pias4,Mapk8,Trp53bp1,Nbn,Smarca5,Ube2n,Kdm4b,H4c14
Recycling pathway of L1	3.19073	0.00181541	Cltc,Tubb6,Ap2s1,Ap2b1,Tubb2b,Tubal3,Actb,Actg1,Ap2a1,Ap2a2,Ap2m1,Dpysl2,Dnm1,Dnm2,Msn,Numb,Rdx,Sh3gl2,Src,Tuba1a,Tuba1b,Tuba4a,Tubb3,Ezr,Mapk1,Tubb4b
Regulated Necrosis	2.46538	0.00413536	Chmp4c,Chmp3,Peli1,Chmp2b,Chmp2a,Gsdmd,Tradd,Chmp7,Mlkl,Ogt,Chmp4b,Chmp6,Birc3,Birc2,Xiap,Bak1,Bax,Casp1,Casp4,Casp3,Casp8,Cdc37,Cflar,Rps27a,Cycs,Fadd,Fas,Flot1,Flot2,Gzmb,Hmgb1,Hsp90aa1,Il1a,Il1b,Pdcd6ip,Ripk1,Sdcbp,Tnfrsf10b,Gsdme,Traf2,Tnfsf10,Uba52,Ubb,Stub1,Ripk3
Regulation of actin dynamics for phagocytic cup formation	3.17459	0.00181541	Actr2,Abi2,Arpc5,Arpc4,Dock1,Wipf2,Brk1,Nckap1l,Wasl,Actr3,Elmo2,Elmo1,Baiap2,Arpc2,Abi1,Cyfip2,Abl1,Actb,Actg1,Arpc1b,Btk,Cd3g,Cd247,Cdc42,Crk,Wasf2,Ptk2,Fcgr1,Fcgr2b,Grb2,Nckipsd,Hsp90ab1,Hsp90aa1,Fcgr4,Limk1,Myh9,Myo10,Myo1c,Myo5a,Nck1,Nf2,Nckap1,Wipf1,Rac1,Cyfip1,Syk,Vav1,Vav2,Was,Arpc3,Arpc1a,Mapk1,Mapk3
Regulation of Complement cascade	2.55388	0.00430239	C7,C8b,Serping1,C1qa,C1qb,C1qc,C2,C3,C3ar1,C4b,C5ar1,Cd81,Cfh,Cfi,Clu,C1ra,Cfp
Regulation of HMOX1 expression and activity	2.61698	0.00338631	Psmd6,Psmd12,Psmd5,Psmc6,Psmd9,Psmd11,Psmd1,Psme4,Psmb11,Bach1,Rps27a,H13,Hmox1,Psmb9,Psmb8,Mafk,Psmd7,Fbxl17,Nfe2l2,Keap1,Psma2,Psma3,Psmb1,Psmb10,Psmb4,Psmb5,Psmb6,Psmb7,Psmc1,Psmc2,Psmc3,Psmc5,Psmd4,Psme1,Psme2,Psme3,Psmd10,Skp1,Psmd2,Psmd3,Uba52,Ubb,Rbx1,Psmc4,Psmd13,Psmd8,Psmd14,Psma1,Psma4,Psma5,Psma6,Psma7,Psmb2,Psmb3,Cul3,Cul1,Skp2,Psmf1
Regulation of Insulin-like Growth Factor (IGF) transport and uptake by Insulin-like Growth Factor Binding Proteins (IGFBPs)	3.31887	0.00181541	Bpifb2,Fuca2,Pnpla2,Shisa5,Pcsk9,Eva1a,Apol11a,Qsox1,Pdia6,Apol9b,Ltbp1,Mgat4a,Golm1,Apob,Mxra8,Spp2,Apol8,Apol7a,Apol7c,Mia3,Prss23,Adam10,Amelx,Aplp2,Apoa1,Apoe,App,Fam20a,Bmp4,C3,C4b,Calu,Chgb,Cp,Csf1,Cst3,Sparcl1,Fbn1,Fn1,Fstl1,Gas6,Fam20c,Sdc2,Apol10a,Igf1,Igf2,Ccn1,Igfbp2,Igfbp3,Igfbp4,Igfbp5,Igfbp6,Il6,Itih2,Ktn1,Lamb1,Lamb2,Lgals1,Matn3,Men1,Mfge8,Fstl3,Nucb1,P4hb,Pappa,Penk,Prkcsh,Proc,C…
Regulation of mitotic cell cycle	1.85746	0.0286327	Cdc14a,Anapc11,Anapc2,Psmd6,Cdc26,Psmd12,Psmd5,Psmc6,Fbxo5,Psmd9,Ube2c,Anapc10,Psmd11,Cdc16,Psmd1,Psme4,Ccnb1,Psmb11,Cdc20,Anapc15,Bub1b,Bub3,Ube2s,Cdk1,Cdk2,Rps27a,Psmb9,Psmb8,Anapc1,Psmd7,Nek2,Plk1,Psma2,Psma3,Psmb1,Psmb10,Psmb4,Psmb5,Psmb6,Psmb7,Psmc1,Psmc2,Psmc3,Psmc5,Psmd4,Psme1,Psme2,Psme3,Anapc4,Ube2d1,Rb1,Cdc23,Anapc16,Psmd10,Cdc27,Aurkb,Psmd2,Psmd3,Uba52,Ubb,Ube2e1,Mad2l1,Anapc7,Fzr1,Psm…
Regulation of mRNA stability by proteins that bind AU-rich elements	2.61934	0.00181541	Exosc3,Psmd6,Exosc7,Exosc1,Psmd12,Psmd5,Psmc6,Psmd9,Psmd11,Tnfsf13,Exosc8,Psmd1,Dcp2,Psme4,Xpo1,Dis3,Psmb11,Parn,Tnpo1,Dcp1a,Exosc4,Akt1,Anp32a,Hnrnpd,Eif4g1,Zfp36l1,Rps27a,Hspa8,Hspb1,Elavl1,Khsrp,Psmb9,Psmb8,Mapkapk2,Psmd7,Exosc9,Pabpc1,Prkca,Prkcd,Psma2,Psma3,Psmb1,Psmb10,Psmb4,Psmb5,Psmb6,Psmb7,Psmc1,Psmc2,Psmc3,Psmc5,Psmd4,Psme1,Psme2,Psme3,Psmd10,Ywhab,Psmd2,Psmd3,Uba52,Ubb,Ywhaz,Zfp36,Set,…
Regulation of necroptotic cell death	1.94177	0.042954	Peli1,Tradd,Mlkl,Ogt,Birc3,Birc2,Xiap,Casp8,Cdc37,Cflar,Rps27a,Fadd,Fas,Flot1,Flot2,Hsp90aa1,Pdcd6ip,Ripk1,Sdcbp,Tnfrsf10b,Traf2,Tnfsf10,Uba52,Ubb,Stub1,Ripk3
Regulation of ornithine decarboxylase (ODC)	2.19956	0.0105455	Psmd6,Psmd12,Psmd5,Psmc6,Psmd9,Psmd11,Psmd1,Psme4,Psmb11,Psmb9,Psmb8,Psmd7,Nqo1,Oaz1,Oaz2,Odc1,Psma2,Psma3,Psmb1,Psmb10,Psmb4,Psmb5,Psmb6,Psmb7,Psmc1,Psmc2,Psmc3,Psmc5,Psmd4,Psme1,Psme2,Psme3,Psmd10,Azin1,Psmd2,Psmd3,Psmc4,Psmd13,Psmd8,Psmd14,Psma1,Psma4,Psma5,Psma6,Psma7,Psmb2,Psmb3,Psmf1
Regulation of PLK1 Activity at G2/M Transition	1.74245	0.04599	Cep152,Haus6,Nde1,Haus3,Akap9,Ssna1,Ccp110,Dctn2,Cep192,Fbxw11,Tubg1,Csnk1d,Optn,Haus5,Ccnb1,Alms1,Ofd1,Haus7,Cep57,Cep72,Ckap5,Haus8,Clasp1,Sdccag8,Bora,Ccnb2,Cdk1,Rps27a,Dctn1,Sfi1,Dync1h1,Dync1i2,Mapre1,Hsp90aa1,Cep250,Rab8a,Cdk5rap2,Ppp1r12a,Nedd1,Nek2,Odf2,Pafah1b1,Pcm1,Pcnt,Prkaca,Plk1,Ppp2r1a,Ppp1cb,Prkar2b,Cep290,Dctn3,Plk4,Cep135,Actr1a,Skp1,Tuba1a,Tuba4a,Tubb5,Uba52,Ubb,Cenpj,Ywhae,Ywha…
Regulation of PTEN gene transcription	2.05122	0.0256938	Gatad2b,Lamtor4,Lamtor1,Sall4,Rraga,Lamtor5,Maf1,Gatad2a,Slc38a9,Hdac1,Chd4,Bmi1,Cbx4,Phc3,Phc1,Eed,Mecom,Ezh2,Hdac2,Rbbp7,Mbd3,Lamtor2,Mta3,Rragd,Rbbp4,Rheb,Ring1,Rnf2,Suz12,Chd3,Rragc,Phc2,Lamtor3,Mta2,Mlst8,Mtor,Scmh1,Cbx8
Regulation of PTEN stability and activity	2.5806	0.00413536	Psmd6,Wwp2,Psmd12,Psmd5,Psmc6,Psmd9,Rnf146,Psmd11,Psmd1,Psme4,Otud3,Psmb11,Tnks2,Prex2,Akt1,Akt2,Xiap,Rps27a,Csnk2a1,Csnk2a2,Csnk2b,Frk,Psmb9,Psmb8,Psmd7,Nedd4,Psma2,Psma3,Psmb1,Psmb10,Psmb4,Psmb5,Psmb6,Psmb7,Psmc1,Psmc2,Psmc3,Psmc5,Psmd4,Psme1,Psme2,Psme3,Pten,Trim27,Psmd10,Psmd2,Tnks,Psmd3,Uba52,Ubb,Stub1,Akt3,Psmc4,Psmd13,Psmd8,Psmd14,Psma1,Psma4,Psma5,Psma6,Psma7,Psmb2,Psmb3,Psmf1
Regulation of RAS by GAPs	2.14587	0.0101916	Psmd6,Psmd12,Psmd5,Psmc6,Psmd9,Spred3,Psmd11,Dab2ip,Psmd1,Psme4,Psmb11,Syngap1,Rps27a,Kbtbd7,Hras,Rasa2,Spred1,Spred2,Kras,Psmb9,Psmb8,Psmd7,Nf1,Psma2,Psma3,Psmb1,Psmb10,Psmb4,Psmb5,Psmb6,Psmb7,Psmc1,Psmc2,Psmc3,Psmc5,Psmd4,Psme1,Psme2,Psme3,Rasa3,Psmd10,Rasa4,Psmd2,Rasa1,Psmd3,Uba52,Ubb,Rbx1,Psmc4,Psmd13,Psmd8,Rasal3,Psmd14,Psma1,Psma4,Psma5,Psma6,Psma7,Psmb2,Psmb3,Cul3,Rasal2,Psmf1
Regulation of RUNX2 expression and activity	2.60902	0.00338631	Psmd6,Psmd12,Psmd5,Psmc6,Psmd9,Psmd11,Psmd1,Runx2,Rps27a,Psmb9,Psmb8,Psmd7,Psma2,Psma3,Psmb1,Psmb10,Psmb4,Psmb5,Psmb6,Psmb7,Psmc1,Psmc2,Psmc3,Psmc5,Psmd4,Psme1,Psme2,Psme3,Psmd10,Skp1,Psmd2,Psmd3,Uba52,Ubb,Stub1,Rbx1,Psmc4,Psmd13,Psmd8,Psmd14,Psma1,Psma4,Psma5,Psma6,Psma7,Psmb2,Psmb3,Cul1,Skp2,Psmf1
Regulation of RUNX3 expression and activity	2.80375	0.00248815	Smurf2,Psmd6,Ep300,Psmd12,Psmd5,Psmc6,Psmd9,Psmd11,Psmd1,Smurf1,Cbfb,Rps27a,Psmb9,Psmb8,Mdm2,Psmd7,Psma2,Psma3,Psmb1,Psmb10,Psmb4,Psmb5,Psmb6,Psmb7,Psmc1,Psmc2,Psmc3,Psmc5,Psmd4,Psme1,Psme2,Psme3,Psmd10,Src,Psmd2,Tgfb1,Psmd3,Uba52,Ubb,Psmc4,Psmd13,Psmd8,Psmd14,Psma1,Psma4,Psma5,Psma6,Psma7,Psmb2,Psmb3,Psmf1
Regulation of TP53 Activity through Acetylation	2.09647	0.0260946	Gatad2b,Ing5,Ep300,Ing2,Meaf6,Gatad2a,Brpf3,Hdac1,Chd4,Pip4k2b,Akt1,Akt2,Brpf1,Hdac2,Rbbp7,Mbd3,Pip4k2a,Pip4k2c,Pml,Rbbp4,Chd3,Trp53,Pip4p1,Akt3,Mta2,Pin1,Map2k6,Brd7,Brd1
Resolution of Abasic Sites (AP sites)	-1.81664	0.0170855	Pole4,Adprs,Rpa3,Rpa1,Rfc3,Pold4,Mutyh,Smug1,Mpg,Rfc5,Neil1,Rfc4,Parp2,Apex1,Lig1,Mbd4,Nthl1,Ogg1,Pcna,Polb,Pold1,Pold2,Pole,Pole2,Rfc1,Rfc2,Tdg,Ung,Neil2,Xrcc1,Pole3
Resolution of D-Loop Structures	-2.22096	0.00181541	Dna2,Mus81,Rmi1,Slx1b,Atm,Blm,Brca2,Gen1,Kat5,Mre11a,Rad51b,Rad51d,Slx4,Top3a,Wrn,Exo1,Nbn,Rmi2,Spidr,Rbbp8,Eme2
Resolution of D-loop Structures through Holliday Junction Intermediates	-2.22096	0.00181541	Dna2,Mus81,Rmi1,Slx1b,Atm,Blm,Brca2,Gen1,Kat5,Mre11a,Rad51b,Rad51d,Slx4,Top3a,Wrn,Exo1,Nbn,Rmi2,Spidr,Rbbp8,Eme2
Respiratory electron transport	4.2072	0.00181541	Ndufb5,Ndufa3,Ndufa9,Cox7b,Uqcr10,Ndufb9,Ndufb6,Cox20,Ndufc1,Cox14,Ndufa12,Ndufa7,Cyc1,Ndufb3,Uqcrh,Tmem186,Uqcrfs1,Ndufaf3,Etfdh,Ndufb7,Uqcrc2,Ndufa6,Ndufa13,Ndufb8,Ndufa10,Cox18,Coq10b,Cox19,Ndufb4,Ndufc2,Ndufb2,Ndufa5,Ndufb10,Ndufs3,Ndufa8,Tmem126b,Ndufaf4,Ndufaf5,Ndufaf1,Cox11,Taco1,Ndufab1,Ndufs5,Ndufb11,Lrpprc,Ndufv2,Ndufaf7,Ndufs7,Ndufaf2,Timmdc1,Ndufaf6,Cox6b1,Etfb,Etfa,Ndufv3,Cox4i1,Cox5…
Respiratory electron transport, ATP synthesis by chemiosmotic coupling, and heat production by uncoupling proteins.	4.75532	0.00181541	Atp5d,Ndufb5,Ndufa3,Ndufa9,Cox7b,Uqcr10,Ndufb9,Ndufb6,Cox20,Ndufc1,Cox14,Ndufa12,Ndufa7,Cyc1,Ndufb3,Uqcrh,Tmem186,Uqcrfs1,Ndufaf3,Etfdh,Ndufb7,Uqcrc2,Atp5e,Ndufa6,Ndufa13,Ndufb8,Ndufa10,Cox18,Coq10b,Atp5g2,Cox19,Dmac2l,Ndufb4,Ndufc2,Ndufb2,Ndufa5,Ndufb10,Ndufs3,Ndufa8,Tmem126b,Ndufaf4,Ndufaf5,Ndufaf1,Cox11,Taco1,Ndufab1,Ndufs5,Ndufb11,Atp5h,Lrpprc,Ndufv2,Ndufaf7,Ndufs7,Ndufaf2,Timmdc1,Ndufaf6,Atp…
Response to elevated platelet cytosolic Ca2+	3.4272	0.00181541	Nhlrc2,Ola1,Cdc37l1,Tmx3,Chid1,Apool,Mmrn1,Qsox1,Rarres2,Endod1,Cyb5r1,Brpf3,Ly6g6f,Serpina3f,Spp2,Abcc4,Sccpdh,Pcyox1l,Actn1,Actg1,Aldoa,Anxa5,Aplp2,Apoa1,Apoh,App,Serping1,Calm1,Calm2,Calm3,Cd36,Cd63,Cd9,Clu,Ctsw,Lefty1,Ecm1,Fn1,Gas6,Rab27b,Hgf,Maged2,Igf1,Igf2,Itga2b,Itgb3,Lamp2,Orm1,Orm2,Pdgfa,Pdgfb,Pecam1,Prkca,Lgals3bp,Srgn,Pros1,Psap,Tmsb4x,A1bg,Selp,Selenop,Sod1,Sparc,Serpina3g,Stx4a,Stxb…
Retinoid metabolism and transport	2.77003	0.00181541	Gpc2,Bco2,Apob,Plb1,Lrp12,Clps,Apoa1,Apoa4,Apoc2,Apoc3,Apoe,Akr1b7,Lrat,Gpc1,Gpc4,Sdc2,Hspg2,Lrp1,Rdh11,Rbp1,Rbp2,Rbp4,Sdc1,Sdc3,Sdc4,Gpc6,Bco1,Lrp10
RHO GTPase cycle	2.6571	0.00197525	Lbr,Frs2,Vangl1,Emc3,Gfod1,Maco1,Arfgap3,Arhgef39,Lamtor1,Golga2,Plekhg3,Wwp2,Baiap2l1,Rras2,Abi2,Arhgef16,Pkn3,Cltc,Arhgap24,Plxnd1,Taok3,Arl13b,Fam135a,Ndufa5,Ndufs3,Arhgap25,Fgd5,Steap3,Dock1,Wipf2,Brk1,Samm50,Plekhg2,Anln,Arhgap32,Ccp110,Dock5,Hint2,Arhgap35,Garre1,Rhobtb1,Arhgef18,Rhou,Picalm,Ccdc115,Arap1,Vrk2,Chn2,Kctd13,Arhgef10,Basp1,Lman1,Arhgap17,Pak4,Arhgap45,Pgrmc2,Potegl,Arhgap19,Dl…
RHO GTPase Effectors	3.13242	0.00181951	Cenpe,Ska2,Myl9,Cenpp,Spc25,Cenpm,Actr2,Dsn1,Nuf2,Abi2,Pmf1,Ndc80,Mis12,Pkn3,Nde1,Kdm1a,H4c17,Spc24,Itgb3bp,Arpc5,Myl12b,Tubb6,Zwilch,Arpc4,Dynll2,Ppp1r14a,Wipf2,Brk1,Sgo2a,H2aj,B9d2,H4c8,Prc1,Nup37,Nup43,Spdl1,Nup107,Xpo1,Dync1li2,Nup133,Fmnl2,Rhoq,Dync1li1,Cenpu,Noxo1,Myh14,Seh1l,Cenpn,Sgo1,Nckap1l,Wasl,Nup98,Tubb2b,Kif2c,Actr3,Tubal3,Klc4,Cdc20,Cenpf,Baiap2,Pik3r4,Ckap5,Rcc2,Tax1bp3,Clasp2,Pkn…
RHO GTPases activate PAKs	3.36248	0.00181541	Myl9,Myl12b,Myh14,Myh10,Calm1,Calm2,Calm3,Cdc42,Limk1,Myh9,Myl6,Ppp1r12a,Nf2,Ppp1cb,Rac1,Pak2,Flna
RHO GTPases activate PKNs	3.53788	0.00181541	Pkn3,Kdm1a,H4c17,Ppp1r14a,H2aj,H4c8,Pkn2,Kdm4c,Rhoa,Rhob,Rhoc,H2az2,Cdc25c,H3f3a,H3f3b,H2ac18,H2ax,Ppp1r12a,Ncoa2,Pdpk1,H2az1,Ppp1cb,Rac1,Ywhab,Ywhae,Ywhag,Ywhah,Ywhaq,Ywhaz,Sfn,H3c2,H4c11,H2ac10,H2bc11,H2bc3,H2bc21,Pkn1,H4c14,H3c1
RHO GTPases Activate WASPs and WAVEs	3.27752	0.00181541	Actr2,Abi2,Arpc5,Arpc4,Wipf2,Brk1,Nckap1l,Wasl,Actr3,Baiap2,Arpc2,Abi1,Cyfip2,Abl1,Actb,Actg1,Arpc1b,Btk,Cdc42,Wasf2,Ptk2,Grb2,Nckipsd,Nck1,Nckap1,Wipf1,Rac1,Cyfip1,Was,Arpc3,Arpc1a,Mapk1,Mapk3
RHOA GTPase cycle	1.9673	0.00894206	Lbr,Vangl1,Emc3,Maco1,Plekhg3,Pkn3,Arhgap24,Anln,Arhgap32,Arhgap35,Arhgef18,Ccdc115,Arap1,Arhgef10,Lman1,Arhgap45,Pgrmc2,Arhgap19,Arhgap26,Arhgap21,Arhgap42,Sowahc,Arhgef3,Arhgef40,Arhgap28,Arhgef10l,Arhgap8,Myo9a,Arhgap18,Acbd5,Arap3,Arhgap22,Akap13,Arhgef17,Prex2,Pkn2,Faf2,Scfd1,Actc1,Ddrgk1,Iqgap3,Abr,Rhoa,Arhgap6,Arhgdib,Bcr,Daam1,Arhgef28,Cav1,Arhgap31,Cit,Arhgap10,Gmip,Diaph1,Ect2,Stom,Star…
RHOB GTPase cycle	1.98222	0.0216074	Vangl1,Pkn3,Anln,Arhgap32,Arhgap35,Arhgef10,Arhgap26,Arhgap21,Sowahc,Arhgef3,Arhgef10l,Myo9a,Akap13,Arhgef17,Pkn2,Actc1,Iqgap3,Abr,Rhob,Bcr,Daam1,Arhgef28,Cav1,Cit,Diaph1,Ect2,Stom,Stard13,Flot1,Flot2,Prex1,Jup,Arhgef2,Arhgef1,Arhgef11,Dlc1,Mcam,Pik3r1,Pik3r2,Cavin1,Rhpn2,Rock1,Rock2,Arhgef25,Rtkn,Snap23,Stk10,Slk,Pcdh7,Arhgef5,Tjp2,Depdc1b,Tfrc,Vamp3,Vav2,Net1,Diaph3,Pkn1,Erbin,Racgap1,Arhgap39,…
RHOBTB GTPase Cycle	2.67508	0.00181541	Rhobtb1,Cpsf7,Stk38,Rnf20,Msi2,Actn1,Actg1,Cct2,Cct6a,Cct7,Cdc37,Pde5a,Cops2,Hnrnpc,Hsp90ab1,Hsp90aa1,Rhobtb2,Tmod3,Srrm1,Twf1,Rbbp6,Rbmx,Rock1,Rock2,Tra2b,Txnl1,Ddx39b,Vim,Dbn1,Spen,Cul3,Cops4
RHOBTB1 GTPase cycle	1.94987	0.0379085	Rhobtb1,Cpsf7,Stk38,Rnf20,Cct2,Cct7,Pde5a,Cops2,Hnrnpc,Srrm1,Rbbp6,Rbmx,Rock1,Rock2,Tra2b,Txnl1,Vim,Dbn1,Spen,Cul3,Cops4
RHOBTB2 GTPase cycle	2.8309	0.00181541	Stk38,Msi2,Actn1,Actg1,Cct2,Cct6a,Cct7,Cdc37,Hnrnpc,Hsp90ab1,Hsp90aa1,Rhobtb2,Tmod3,Srrm1,Twf1,Rbmx,Tra2b,Txnl1,Ddx39b,Dbn1,Cul3
RHOC GTPase cycle	2.40113	0.00472971	Lbr,Vangl1,Maco1,Pkn3,Anln,Arhgap32,Arhgap35,Arhgef10,Lman1,Arhgap26,Fmnl2,Arhgap21,Arhgef40,Arhgef10l,Arhgap18,Acbd5,Akap13,Arhgef17,Pkn2,Iqgap3,Abr,Rhoa,Rhoc,Bcr,Daam1,Arhgef28,Cav1,Cit,Diaph1,Stom,Stard13,Flot1,Flot2,Prex1,Jup,Arhgef1,Arhgef11,Dlc1,Mcam,Pik3r1,Cavin1,Abcd3,Rock1,Rock2,Arhgef25,Rtkn,Stk10,Slk,Arhgef5,Tjp2,Depdc1b,Tfrc,Vamp3,Vav2,Fmnl3,Stx5a,Diaph3,Pkn1,Erbin,Racgap1,Arhgap39,Op…
RHOG GTPase cycle	2.8202	0.00181541	Lbr,Vangl1,Arfgap3,Lamtor1,Plekhg3,Arhgef16,Ndufa5,Ndufs3,Dock1,Arhgap32,Dock5,Arhgap35,Garre1,Vrk2,Lman1,Pak4,Pgrmc2,Arhgap21,Cdc42ep1,Ankle2,Elmo2,Shmt2,Mpp7,Arhgdib,Cav1,Cdc42,Dsg2,Epha2,Prex1,Hspe1,Itgb1,Itsn1,Ktn1,Mcam,Pik3r1,Rab7,Stbd1,Lemd3,Cyfip1,Iqgap2,Kalrn,Arhgef5,Depdc1b,Tfrc,Vamp3,Vav1,Vav2,Rhog,Letm1,Stx5a,Ykt6,Diaph3,Esyt1,Erbin,Map3k11,Trio,Arhgap39,Pak2,Dock2,Ophn1,Arhgdia,Arhgap…
RHOH GTPase cycle	2.03577	0.0302525	Vangl1,Lamtor1,Pak4,Uaca,Vcp,Mtr,Rhoh,Wdr11,Arhgdib,Cav1,Csk,Dbt,Stom,Fam91a1,Jup,Lck,Pak6,Rab7,Rock1,Rock2,Tfrc,Tuba1b,Vamp3,Dbn1,Tmem59,Ralgapa1,Nsfl1c,Pak2,Arhgdia
RHOJ GTPase cycle	2.03344	0.0233397	Vangl1,Lamtor1,Wwp2,Arl13b,Steap3,Wipf2,Arhgap32,Arhgap35,Pak4,Arhgap26,Arhgap21,Cdc42ep1,Scrib,Wasl,Mpp7,Dock8,Iqgap3,Cav1,Cdc42,Stom,Fnbp1,Gja1,Prex1,Rhoj,Jup,Pik3r1,Pik3r2,Rab7,Git1,Snap23,Cdc42bpb,Arhgef7,Depdc1b,Tfrc,Vamp3,Was,Fmnl3,Diaph3,Ocrl,Git2,Trio,Pak2,Ophn1,Cdc42bpa,Arhgap1
RHOQ GTPase cycle	2.15904	0.0130065	Vangl1,Gfod1,Lamtor1,Plekhg3,Wwp2,Arl13b,Steap3,Arhgap32,Arhgap35,Arhgap17,Pak4,Arhgap26,Arhgap21,Rhoq,Cdc42ep2,Cdc42ep1,Scrib,Wasl,Trip10,Mpp7,Iqgap3,Cav1,Cdc42,Cftr,Stom,Fnbp1,Srgap2,Gja1,Prex1,Itsn1,Jup,Dlc1,Rab7,Git1,Snap23,Cdc42bpb,Arhgef7,Depdc1b,Tfrc,Vamp3,Diaph3,Cdc42ep4,Git2,Pak2,Ophn1,Gopc,Iqgap1,Cdc42bpa,Cdc42ep3,Arhgap1
RHOU GTPase cycle	1.85962	0.049826	Vangl1,Wwp2,Cltc,Rhou,Pak4,Dlg5,Cdc42,Arhgap31,Epha2,Srgap2,Grb2,Hgs,Peak1,Nck1,Nck2,Wdr6,Pik3r1,Pik3r2,Ptk2b,Git1,Txnl1,Sptbn1,Stam,Arhgef7,Depdc1b,Usp9x,Stam2,Pard6a,Git2,Pak2,Iqgap1,Arhgap30
Ribosomal scanning and start codon recognition	4.99401	0.00181541	Eif3f,Rps23,Rps21,Rps10,Eif2s2,Rps20,Rps27l,Rps13,Eif3h,Rps15a,Eif3k,Rps25,Eif4b,Rps9,Eif4g1,Eif3j1,Eif2s1,Eif3a,Eif4a1,Eif4a2,Eif4e,Eif3e,Rpsa,Rps2,Rps14,Rps15,Rps16,Rps17,Rps18,Rps19,Rps24,Rps29,Rps3a1,Rps4x,Rps5,Rps6,Rps7,Rps8,Eif3g,Eif5,Rps28,Eif3i,Eif4h,Eif3d,Eif3c,Rps27,Eif2s3x,Rps3,Eif3l,Rps11,Rps26,Eif3b,Eif3m
RIPK1-mediated regulated necrosis	1.94177	0.042954	Peli1,Tradd,Mlkl,Ogt,Birc3,Birc2,Xiap,Casp8,Cdc37,Cflar,Rps27a,Fadd,Fas,Flot1,Flot2,Hsp90aa1,Pdcd6ip,Ripk1,Sdcbp,Tnfrsf10b,Traf2,Tnfsf10,Uba52,Ubb,Stub1,Ripk3
RMTs methylate histone arginines	2.12661	0.0162498	Coprs,Smarcd3,Prmt6,Smarca2,H4c17,Smarcc2,H2aj,H4c8,Wdr77,Prmt3,Wdr5,Arid1b,Arid2,Ccnd1,Cdk4,Dnmt3a,H2ac18,Prmt1,Rbbp7,Rps2,Prmt7,Smarcd1,Smarcd2,Smarca4,Smarcb1,Smarcc1,Actl6a,H3c2,H4c11,H2aw,H2ac10,Smarce1,Carm1,Prmt5,Arid1a,H4c14,H2ac21,H3c1
RNA Polymerase I Promoter Clearance	2.38327	0.00619522	Gatad2b,Polr1h,Polr2e,Gtf2h5,Polr2l,Ccnh,H4c17,H2aj,H4c8,Polr2f,Gatad2a,Hdac1,Rrn3,Chd4,Taf1d,Ehmt2,H2az2,Cdk7,Gtf2h3,Ercc2,Ercc3,Gtf2h1,H3f3a,H3f3b,Hdac2,H2ac18,H2ax,Rbbp7,Polr2h,Mbd2,Mbd3,Mnat1,Polr2k,Mta3,H2az1,Rbbp4,Polr1c,Polr1b,Polr1a,Chd3,Taf1a,Taf1b,Taf1c,Tbp,Ttf1,Gtf2h2,Mta2,H3c2,H4c11,H2ac10,H2bc11,H2bc3,H2bc21,Ercc6,Mapk3,Polr1f,H4c14,Polr1e,H3c1
RNA Polymerase I Promoter Escape	1.98035	0.029622	Polr1h,Polr2e,Gtf2h5,Polr2l,Ccnh,H4c17,H2aj,H4c8,Polr2f,Rrn3,Taf1d,H2az2,Cdk7,Gtf2h3,Ercc2,Ercc3,Gtf2h1,H3f3a,H3f3b,H2ac18,H2ax,Polr2h,Mnat1,Polr2k,H2az1,Polr1c,Polr1b,Polr1a,Taf1a,Taf1b,Taf1c,Tbp,Gtf2h2,H3c2,H4c11,H2ac10,H2bc11,H2bc3,H2bc21,Polr1f,H4c14,Polr1e,H3c1
RNA Polymerase I Promoter Opening	3.37739	0.00181541	H4c17,H2aj,H4c8,H2az2,H3f3a,H3f3b,H2ac18,H2ax,Mbd2,H2az1,H3c2,H4c11,H2ac10,H2bc11,H2bc3,H2bc21,Mapk3,H4c14,H3c1
RNA Polymerase I Transcription	2.45218	0.00472971	Gatad2b,Polr1h,Polr2e,Gtf2h5,Polr2l,Ccnh,H4c17,H2aj,H4c8,Polr2f,Gatad2a,Hdac1,Rrn3,Chd4,Taf1d,Ehmt2,H2az2,Cdk7,Gtf2h3,Ercc2,Ercc3,Gtf2h1,H3f3a,H3f3b,Hdac2,H2ac18,H2ax,Rbbp7,Polr2h,Mbd2,Mbd3,Mnat1,Polr2k,Mta3,H2az1,Cavin1,Rbbp4,Polr1c,Polr1b,Polr1a,Chd3,Taf1a,Taf1b,Taf1c,Tbp,Ttf1,Gtf2h2,Mta2,H3c2,H4c11,H2ac10,H2bc11,H2bc3,H2bc21,Ercc6,Mapk3,Polr1f,H4c14,Polr1e,H3c1
RNA Polymerase II Pre-transcription Events	1.78967	0.0397613	Gtf2b,Wdr61,Polr2e,Taf12,Gtf2h5,Polr2l,Ccnh,Taf13,Polr2b,Ctdp1,Elob,Polr2g,Eloc,Ncbp2,Gtf2e2,Gtf2f2,Taf11,Polr2d,Polr2f,Polr2i,Mllt3,Taf15,Gtf2a2,Leo1,Taf4b,Ccnt2,Ncbp1,Iws1,Taf1,Gtf2e1,Eaf1,Cdk9,Taf9,Rtf1,Ccnt1,Cdk7,Gtf2h3,Taf3,Ell,Ercc2,Ercc3,Taf9b,Gtf2h1,Supt16,Polr2h,Mnat1,Polr2k,Cdc73,Gtf2a1,Polr2a,Polr2c,Ssrp1,Supt4a,Supt5,Supt6,Taf6,Tbp,Tcea1,Paf1,Ctr9,Gtf2h2,Taf7,Taf10,Nelfa,Nelfcd,Nelfb,…
RNA Polymerase II Transcription Elongation	2.02403	0.0217335	Wdr61,Polr2e,Gtf2h5,Polr2l,Ccnh,Polr2b,Ctdp1,Elob,Polr2g,Eloc,Ncbp2,Gtf2f2,Polr2d,Polr2f,Polr2i,Mllt3,Leo1,Ccnt2,Ncbp1,Iws1,Eaf1,Cdk9,Rtf1,Ccnt1,Cdk7,Gtf2h3,Ell,Ercc2,Ercc3,Gtf2h1,Supt16,Polr2h,Mnat1,Polr2k,Cdc73,Polr2a,Polr2c,Ssrp1,Supt4a,Supt5,Supt6,Tcea1,Paf1,Ctr9,Gtf2h2,Nelfa,Nelfcd,Nelfb,Eloa,Nelfe,Aff4,Mllt1,Gtf2f1
RNA Polymerase II Transcription Termination	2.27592	0.00691977	Sarnp,Clp1,Thoc7,Magohb,Chtop,Fip1l1,Snrpd3,Cstf1,Srsf6,Snrpg,Ncbp2,Upf3b,Sympk,Nudt21,Ddx39a,Srsf11,U2af1l4,Thoc2,Fyttd1,Snrpf,Zc3h11a,Cdc40,Lsm11,Cpsf7,Ncbp1,Thoc3,Poldip3,Wdr33,Pcf11,Thoc5,Srsf9,Cstf2,U2af1,Srsf1,Magoh,Cstf2t,Lsm10,Papola,Cpsf2,Srrm1,Rnps1,Srsf2,Srsf3,Srsf5,Slbp,Snrpb,Snrpe,Ddx39b,Cpsf4,Pabpn1,Alyref,Cpsf3,U2af2,Thoc6,Rbm8a,Casc3,Eif4a3,Srsf7,Thoc1,Cpsf1,Slu7,Dhx38,Cstf3
ROS and RNS production in phagocytes	2.26221	0.0155912	Atp6v1f,Atp6v1g2,Atp6v1g1,Atp6v1c1,Atp6v1d,Hvcn1,Atp6v1h,Atp6v0e2,Atp6v1a,Atp6v1b2,Atp6v0d1,Atp6v1e1,Atp6v0e,Atp6v0a1,Atp6v0c,Cyba,Cybb,Atp6v0b,Mpo,Ncf1,Ncf2,Nos2,Nos3,Slc11a1,Rac2,Atp6v0a2,Tcirg1
ROS sensing by NFE2L2	2.56439	0.00338631	Psmd6,Psmd12,Psmd5,Psmc6,Psmd9,Psmd11,Psmd1,Psme4,Psmb11,Rps27a,Psmb9,Psmb8,Psmd7,Nfe2l2,Keap1,Psma2,Psma3,Psmb1,Psmb10,Psmb4,Psmb5,Psmb6,Psmb7,Psmc1,Psmc2,Psmc3,Psmc5,Psmd4,Psme1,Psme2,Psme3,Psmd10,Psmd2,Psmd3,Uba52,Ubb,Rbx1,Psmc4,Psmd13,Psmd8,Psmd14,Psma1,Psma4,Psma5,Psma6,Psma7,Psmb2,Psmb3,Cul3,Psmf1
rRNA processing	3.71235	0.00181541	Isg20l2,Utp3,Bud23,Nip7,Rpl3l,Nol6,Pno1,Exosc3,Exosc7,Rps23,Rps21,Rpl15,Rpl36al,Rpl35,Exosc1,Riok3,Rpl11,Riok2,Rps10,Rpl14,Nop56,Rplp2,Utp11,Eri1,Rpl37,Rps20,Nob1,Rpl38,Rpp21,Ddx47,Noc4l,Rpl4,Rps27l,Mphosph10,Rpl22l1,Rps13,Rpl39l,Rpl24,Rpl34,Mphosph6,Nol11,Ebna1bp2,Exosc8,Imp3,Rpp25,Rps15a,Ddx49,Rpl5,Riok1,Csnk1d,Rpl23a,Tsr1,Mtrex,Wdr43,Utp14a,Utp15,Rpl12,Dis3,Wdr3,Tex10,Rpl13,Wdr75,Fcf1,Nol9,Rrp…
rRNA processing in the nucleus and cytosol	3.71235	0.00181541	Isg20l2,Utp3,Bud23,Nip7,Rpl3l,Nol6,Pno1,Exosc3,Exosc7,Rps23,Rps21,Rpl15,Rpl36al,Rpl35,Exosc1,Riok3,Rpl11,Riok2,Rps10,Rpl14,Nop56,Rplp2,Utp11,Eri1,Rpl37,Rps20,Nob1,Rpl38,Rpp21,Ddx47,Noc4l,Rpl4,Rps27l,Mphosph10,Rpl22l1,Rps13,Rpl39l,Rpl24,Rpl34,Mphosph6,Nol11,Ebna1bp2,Exosc8,Imp3,Rpp25,Rps15a,Ddx49,Rpl5,Riok1,Csnk1d,Rpl23a,Tsr1,Mtrex,Wdr43,Utp14a,Utp15,Rpl12,Dis3,Wdr3,Tex10,Rpl13,Wdr75,Fcf1,Nol9,Rrp…
RUNX1 regulates genes involved in megakaryocyte differentiation and platelet function	2.57534	0.00181541	Dpy30,Ep300,Prmt6,H4c17,H2aj,Kmt2e,H4c8,Setd1a,Hdac1,Wdr5,Kmt2b,Setd1b,H2az2,Cbfb,H3f3a,H3f3b,H2ac18,H2ax,Prmt1,Rbbp5,Kat2b,H2az1,Sin3a,Sin3b,Zfpm1,Ash2l,H3c2,H4c11,H2ac10,H2bc11,H2bc3,H2bc21,H4c14,H3c1
RUNX1 regulates transcription of genes involved in differentiation of HSCs	2.33131	0.00687831	Psmd6,Ccnh,Psmd12,Psmd5,Psmc6,Psmd9,Psmd11,Psmd1,Psme4,Psmb11,Abl1,Cbfb,Cdk7,Rps27a,Gata3,Itch,Ldb1,Lmo2,Psmb9,Psmb8,Mnat1,Psmd7,Psma2,Psma3,Psmb1,Psmb10,Psmb4,Psmb5,Psmb6,Psmb7,Psmc1,Psmc2,Psmc3,Psmc5,Psmd4,Psme1,Psme2,Psme3,Psmd10,Tal1,Tcf12,Tcf3,Psmd2,Trp73,Psmd3,Uba52,Ubb,Yap1,Psmc4,Psmd13,Psmd8,Psmd14,Psma1,Psma4,Psma5,Psma6,Psma7,Psmb2,Psmb3,Psmf1
SCF(Skp2)-mediated degradation of p27/p21	2.44893	0.00472971	Psmd6,Psmd12,Psmd5,Psmc6,Psmd9,Psmd11,Psmd1,Ccnd1,Ccne1,Ccne2,Cdk2,Cdk4,Cdkn1a,Cdkn1b,Rps27a,Psmb9,Psmb8,Psmd7,Psma2,Psma3,Psmb1,Psmb10,Psmb4,Psmb5,Psmb6,Psmb7,Psmc1,Psmc2,Psmc3,Psmc5,Psmd4,Psme1,Psme2,Psme3,Ptk6,Psmd10,Cks1b,Skp1,Psmd2,Psmd3,Uba52,Ubb,Psmc4,Psmd13,Psmd8,Psmd14,Psma1,Psma4,Psma5,Psma6,Psma7,Psmb2,Psmb3,Cul1,Skp2,Psmf1
Sealing of the nuclear envelope (NE) by ESCRT-III	2.18403	0.0181622	Chmp4c,Chmp3,Tubb6,Chmp2b,Chmp2a,Ist1,Chmp7,Tubb2b,Tubal3,Chmp4b,Chmp6,Spast,Vps4a,Tuba1a,Tuba1b,Tuba4a,Tubb3,Cc2d1b,Lemd2,Tubb4b
Selective autophagy	2.71067	0.00248815	Tomm6,Tomm7,Ube2v1,Map1lc3a,Mfn1,Map1lc3b,Atg12,Tubb6,Tomm20,Usp30,Dynll2,Arl13b,Tomm5,Pink1,Dync1li2,Dync1li1,Fundc1,Mfn2,Pgam5,Tubb2b,Tubal3,Atg5,Atm,Cftr,Rps27a,Csnk2a1,Csnk2a2,Csnk2b,Dync1h1,Dync1i2,Hdac6,Nbr1,Sqstm1,Pcnt,Pex5,Tomm40,Src,Ift88,Tuba1a,Tuba1b,Tuba4a,Tubb3,Uba52,Ubb,Ulk1,Vdac1,Vim,Dynll1,Park7,Tomm22,Tomm70a,Ube2n,Tubb4b
Semaphorin interactions	2.21499	0.0113086	Plxnd1,Arhgap35,Plxnb1,Rhoa,Rhob,Rhoc,Cdk5,Crmp1,Dpysl2,Erbb2,Fes,Fyn,Plxna4,Hsp90ab1,Hsp90aa1,Limk1,Arhgef11,Nrp1,Sema6d,Pip5k1c,Plxna1,Plxna2,Ptprc,Rac1,Rock1,Rock2,Rras,Sema3e,Sema4a,Sema4d,Sema7a,Tln1,Plxnc1,Tyrobp,Dpysl3,Gsk3b,Pak2,Farp2
Senescence-Associated Secretory Phenotype (SASP)	3.39045	0.00181541	Anapc11,Anapc2,Cdc26,H4c17,H2aj,Ube2c,Anapc10,H4c8,Cdc16,Anapc15,Ehmt2,H2az2,Ehmt1,Ube2s,Cdk2,Cdk4,Cdk6,Cdkn1a,Cdkn1b,Cdkn2b,Cebpb,Rps27a,H3f3a,H3f3b,H2ac18,H2ax,Anapc1,H2az1,Anapc4,Ube2d1,Cdc23,Anapc16,Cdc27,Uba52,Ubb,Ube2e1,Anapc7,Fzr1,H3c2,H4c11,H2ac10,H2bc11,H2bc3,H2bc21,Anapc5,Mapk1,Mapk3,H4c14,H3c1
Sensory Perception	-2.31921	0.00181541	Rdh10,Cyp4v3,Cngb1,Gpc2,Olfr78,Bco2,Ppef1,Camkmt,Apob,Rdh1,Plb1,Lrp12,Metap1,Clps,Apoa1,Apoa4,Apoc2,Apoc3,Apoe,Akr1b7,Dhrs9,Fntb,Calm1,Calm2,Calm3,Gnat3,Lrat,Fnta,Gnal,Gnb1,Gnb5,Gpc1,Gpc4,Guca1a,Gucy2e,Sdc2,Hspg2,Awat2,Gucy2f,Itpr3,Lrp1,Rdh11,Myo7a,Nmt1,Nmt2,Tas1r3,Olfr15,Olfr31,Olfr263,Pde6g,Rbp1,Rbp2,Rbp3,Rbp4,Rgs9,Rlbp1,Rpe65,Dhrs3,Sag,Scnn1a,Sdc1,Sdc3,Sdc4,Metap2,Gpc6,Tas2r108,Tas2r106,Hsd17b…
Signal amplification	2.06791	0.0286327	Gng11,P2ry12,Gnat3,Gna11,Gna13,Gna14,Gnai1,Gnai2,Gnai3,Gnaq,Gnb1,Gnb2,Gnb4,Gnb5,Gng10,Gng2,Gng4,Gng5,Gngt2,P2ry1,Pla2g4a,Src,Tbxa2r,Mapk14,Aamp,Gng13
Signal transduction by L1	2.35206	0.0113248	Itga9,Csnk2a1,Csnk2a2,Csnk2b,Egfr,Fgfr1,Itga2b,Itga5,Itgav,Itgb1,Itgb3,Ncam1,Nrp1,Rac1,Vav2,Map2k1,Map2k2,Mapk1,Mapk3
Signaling by CSF3 (G-CSF)	2.38675	0.0086874	Ube2d3,Elob,Eloc,Cul5,Socs3,Socs1,Rps27a,Csf3r,Grb2,Hck,Jak2,Kras,Lyn,Ptpn11,Ube2d1,Rnf7,Shc1,Syk,Tyk2,Uba52,Ubb,Ube2d2a
Signaling by ERBB2	2.262	0.00856385	Rnf41,Cul5,Memo1,Akt1,Akt2,Rhoa,Cdc37,Rps27a,Diaph1,Egfr,Erbb2,Erbb3,Ereg,Fyn,Gab1,Grb2,Hbegf,Hras,Hsp90aa1,Kras,Matk,Usp8,Pik3ca,Pik3r1,Prkca,Prkcd,Prkce,Ptpn12,Ptpn18,Shc1,Ptk6,Sos1,Src,Uba52,Ubb,Yes1,Stub1,Akt3,Erbin
Signaling by ERBB4	2.06141	0.0293273	Psenen,Wwp1,Aph1b,Rps27a,Egfr,Ereg,Grb2,Wwox,Hbegf,Hras,Itch,Kras,Nedd4,Pik3ca,Pik3r1,Psen2,Shc1,Sos1,Src,Stat5a,Uba52,Ubb,Yap1,Ncstn,Aph1a
Signaling by FGFR	1.95018	0.0249604	Frs2,Hnrnpf,Polr2e,Polr2l,Polr2b,Polr2g,Ncbp2,Gtf2f2,Polr2d,Polr2f,Polr2i,Flrt3,Flrt2,Fgfbp3,Ncbp1,Esrp1,Hnrnpm,Braf,Esrp2,Cbl,Rps27a,Fgf15,Fgf2,Fgf7,Fgf9,Fgfbp1,Fgfr1,Fgfr2,Gab1,Galnt3,Grb2,Hnrnpa1,Hras,Spred1,Spred2,Polr2h,Kras,Mknk1,Polr2k,Fgfrl1,Pik3ca,Pik3r1,Plcg1,Ppp2r1a,Ppp2ca,Ppp2cb,Ptpn11,Polr2a,Polr2c,Shc1,Sos1,Src,Tia1,Tial1,Uba52,Ubb,Spry2,Hnrnph1,Mapk1,Mapk3,Rbfox2,Gtf2f1
Signaling by FGFR1	2.17229	0.0186384	Frs2,Flrt3,Flrt2,Braf,Cbl,Rps27a,Fgf2,Fgf9,Fgfr1,Gab1,Grb2,Hras,Spred1,Spred2,Kras,Mknk1,Fgfrl1,Pik3ca,Pik3r1,Plcg1,Ppp2r1a,Ppp2ca,Ppp2cb,Ptpn11,Shc1,Sos1,Src,Uba52,Ubb,Spry2,Mapk1,Mapk3
Signaling by FGFR2	2.11446	0.014342	Frs2,Hnrnpf,Polr2e,Polr2l,Polr2b,Polr2g,Ncbp2,Gtf2f2,Polr2d,Polr2f,Polr2i,Fgfbp3,Ncbp1,Esrp1,Hnrnpm,Braf,Esrp2,Cbl,Rps27a,Fgf2,Fgf7,Fgf9,Fgfbp1,Fgfr2,Gab1,Grb2,Hnrnpa1,Hras,Polr2h,Kras,Mknk1,Polr2k,Pik3ca,Pik3r1,Plcg1,Ppp2r1a,Ppp2ca,Ppp2cb,Ptpn11,Polr2a,Polr2c,Shc1,Sos1,Src,Tia1,Tial1,Uba52,Ubb,Spry2,Hnrnph1,Mapk1,Mapk3,Rbfox2,Gtf2f1
Signaling by FGFR3	2.35831	0.00882061	Frs2,Braf,Cbl,Rps27a,Fgf2,Fgf9,Gab1,Galnt3,Grb2,Hras,Kras,Mknk1,Pik3ca,Pik3r1,Plcg1,Ppp2r1a,Ppp2ca,Ppp2cb,Ptpn11,Shc1,Sos1,Src,Uba52,Ubb,Spry2,Mapk1,Mapk3
Signaling by FGFR4	2.36112	0.00882061	Frs2,Braf,Cbl,Rps27a,Fgf15,Fgf2,Fgf9,Gab1,Grb2,Hras,Kras,Mknk1,Pik3ca,Pik3r1,Plcg1,Ppp2r1a,Ppp2ca,Ppp2cb,Ptpn11,Shc1,Sos1,Src,Uba52,Ubb,Spry2,Mapk1,Mapk3
Signaling by GPCR	-1.76535	0.00353477	Plppr4,Gng11,Abhd6,Cxcl16,Arhgef39,Prlh,Arhgef37,Ece1,Arhgef16,Lpar6,Nts,Taar3,Gpsm1,Daglb,Plekhg2,Ffar2,Ffar1,Ffar3,Arhgef18,P2ry6,Arhgef10,P2ry12,Adcy3,Adcy4,Dgkz,Arhgef3,Rgs12,Plxnb1,Pik3r6,Adcy1,Arhgef40,Grm4,Dagla,Arhgef10l,Gpr37l1,Gpsm3,P2ry13,Ffar4,Gpr68,Rxfp2,Pde4d,P2ry14,Grm5,Grm6,Oxgr1,Rxfp3,Akap13,Nln,Gpr31b,Gpsm2,Arhgef17,Abhd12,Camkk2,Pde2a,Arrb1,Adcy6,Adcy7,Adcy8,Adcy9,Adm,Adora1,Ad…
Signaling by Hedgehog	1.9902	0.0102356	Smurf2,Psmd6,Dzip1,Erlec1,Psmd12,Psmd5,Psmc6,Psmd9,Ift172,Tubb6,Evc2,Psmd11,Psmd1,Fuz,Psme4,Adcy3,Adcy4,Gas8,Ulk3,Adcy1,Vcp,Ofd1,Ttc21b,Tubb2b,Ift140,Psmb11,Ift57,Smurf1,Spopl,Arrb1,Adcy6,Adcy7,Adcy8,Adcy9,Gpr161,Dync2h1,Grk2,Rps27a,Gas1,Gli1,Gli2,Hhip,Ihh,Ift122,Itch,Ift52,Kif3a,Psmb9,Psmb8,Psmd7,Disp2,Cdc73,Numb,P4hb,Derl2,Prkaca,Prkacb,Prkar1a,Prkar1b,Prkar2b,Psma2,Psma3,Psmb1,Psmb10,Psmb4,Psm…
Signaling by Insulin receptor	2.45481	0.00413536	Frs2,Atp6v1f,Atp6v1g2,Atp6v1g1,Atp6v1c1,Atp6v1d,Pik3cb,Pik3r4,Them4,Atp6v1h,Atp6v0e2,Akt2,Atp6v1a,Atp6v1b2,Atp6v0d1,Atp6v1e1,Atp6v0e,Atp6v0a1,Atp6v0c,Fgf15,Fgf2,Fgf7,Fgf9,Fgfr1,Fgfr2,Flt3l,Gab1,Grb10,Grb2,Atp6v0b,Insr,Tlr9,Irs1,Pde3b,Pdpk1,Pik3ca,Pik3r1,Pik3r2,Ptpn11,Shc1,Sos1,Atp6ap1,Atp6v0a2,Irs2,Mapk1,Mapk3,Tcirg1,Pik3c3,Trib3
Signaling by Interleukins	2.2051	0.00181541	Psmd6,Tab1,Ube2v1,Il22ra1,Psmd12,Psmd5,Psmc6,Psmd9,Peli1,Tnip2,Dusp6,Ifnl2,Tab2,Vrk3,Psmd11,Gsdmd,Nkiras1,Mapkapk3,Irak4,Psmd1,Psme4,Fbxw11,Dusp7,Nkiras2,Dusp3,Rps6ka5,Il20ra,Psmb11,Irak3,Il1rl2,Pik3cb,Nod1,Rapgef1,Irak2,Il31,Il34,Txlna,Il33,App,Atf1,Atf2,Casp1,Casp3,Cbl,Socs3,Socs1,Rps27a,Cntfr,Creb1,Crk,Crkl,Csf1,Csf1r,Csf2ra,Csf3r,Ctf1,Ifnlr1,Fos,Fyn,Grb2,Hck,Ptpn6,Hmgb1,Ikbkb,Ikbkg,Il10ra,Il1…
Signaling by MET	2.53454	0.00344714	Ranbp10,Rapgef1,Rap1a,Arf6,Cbl,Rps27a,Col11a2,Col3a1,Col5a1,Col5a2,Col1a1,Col1a2,Crk,Crkl,Col27a1,Eps15,Ptk2,Fn1,Gab1,Grb2,Hgf,Hgs,Hras,Lrig1,Itga2,Itga3,Itgb1,Kras,Lama1,Lama2,Lama3,Lama4,Lama5,Lamb1,Lamb2,Lamb3,Usp8,Pik3ca,Pik3r1,Rap1b,Ptpn1,Ptpn11,Ptpn2,Ptprj,Rab4a,Rab4b,Rac1,Sh3gl2,Sh3gl1,Sh3gl3,Shc1,Tns4,Sos1,Spint1,Spint2,Src,Stam,Stat3,Col5a3,Hgfac,Uba52,Ubb,Stam2,Ranbp9,Tns3,Sh3kbp1,Muc20…
Signaling by Non-Receptor Tyrosine Kinases	2.47678	0.00337728	Lrrk2,Dock1,Arhgap35,Arap1,Sfpq,Stap2,Elmo2,Elmo1,Akt1,Rhoa,Cbl,Ccnd1,Ccne1,Cdk2,Cdk4,Cdkn1b,Socs3,Rps27a,Bcar1,Crk,Dok1,Egfr,Erbb2,Ereg,Khdrbs3,Hbegf,Hif1a,Hras,Kras,Ptpn1,Pxn,Rac1,Khdrbs1,Ptk6,Stat3,Rasa1,Uba52,Ubb
Signaling by NOTCH	1.9288	0.0374189	Psenen,Snw1,Ep300,Wwp2,Maml1,Maml3,Maml2,Dtx4,Adam10,Aph1b,Akt1,Rps27a,Dll1,Egfr,Elf3,Dtx1,Kat2a,Itch,Jag1,Jag2,Notch1,Notch4,Kat2b,Furin,Prkci,Psen2,Rbpj,Dll4,Uba52,Ubb,Ybx1,Ywhaz,Tmed2,Ncstn,Aph1a
Signaling by NOTCH3	1.83886	0.042954	Psenen,Wwp2,Adam10,Aph1b,Rps27a,Dll1,Egfr,Jag1,Jag2,Psen2,Dll4,Uba52,Ubb,Ybx1,Ncstn,Aph1a
Signaling by NTRK1 (TRKA)	2.47887	0.00413536	Frs2,Cltc,Dusp6,Vrk3,Ap2s1,Mapkapk3,Dusp7,Ap2b1,Dusp3,Rps6ka5,Pik3cb,Rapgef1,Chd4,Braf,Rap1a,Ap2a1,Ap2a2,Ap2m1,Rhoa,Atf1,Kidins220,Creb1,Crk,Crkl,Grb2,Hras,Irs1,Kras,Mapkapk2,Nab2,Ngf,Ntrk1,Pik3ca,Pik3r1,Pik3r2,Ppp2r1a,Ppp2ca,Ppp2cb,Shc2,Ralgds,Sgk1,Sh3gl2,Shc1,Shc3,Sos1,Srf,Ywhab,Mapk7,Irs2,Dusp4,Map2k1,Map2k2,Mapk1,Mapk14,Mapk3
Signaling by NTRKs	2.60038	0.00413536	Frs2,Cltc,Dusp6,Vrk3,Ap2s1,Mapkapk3,Dusp7,Ap2b1,Dusp3,Rps6ka5,Pik3cb,Rapgef1,Chd4,Braf,Rap1a,Ap2a1,Ap2a2,Ap2m1,Rhoa,Atf1,Kidins220,Creb1,Crk,Crkl,Fyn,Grb2,Hras,Irs1,Kras,Mapkapk2,Nab2,Ngf,Ntf3,Ntrk1,Ntrk3,Furin,Pcsk5,Pcsk6,Pik3ca,Pik3r1,Pik3r2,Plcg1,Ppp2r1a,Ppp2ca,Ppp2cb,Rac1,Shc2,Ralgds,Sgk1,Sh3gl2,Shc1,Shc3,Sos1,Src,Srf,Ywhab,Mapk7,Irs2,Dusp4,Map2k1,Map2k2,Mapk1,Mapk14,Mapk3
Signaling by Nuclear Receptors	2.33973	0.00181541	Rdh10,Gng11,Polr2e,Ep300,Polr2l,Kdm1a,Polr2b,H4c17,Polr2g,Ppid,Pdhb,Zdhhc21,Cyp26b1,H2aj,Gtf2f2,Polr2d,H4c8,Zdhhc7,Polr2f,Polr2i,Xpo1,Dlat,Gtf2a2,Epgn,Rdh14,Nrip1,Strn,Pdk3,Hdac1,Aldh8a1,Rdh1,Cdk9,Rdh13,Abca1,Adh1,Akt1,Akt2,Aldh1a1,Areg,Atf2,H2az2,Dhrs9,Calm1,Calm2,Calm3,Cav1,Cbfb,Ccnt1,Cdkn1b,Cpt1a,Cpt1b,Sdr16c5,Creb1,Cyp26a1,Dld,Gnat3,S1pr3,Egfr,Ereg,Ptk2,Fkbp4,Fkbp5,Fos,Gata3,Gnai1,Gnai2,Gnai3…
Signaling by PDGF	2.39344	0.00406946	Pik3cb,Rapgef1,Col6a5,Col3a1,Col4a1,Col4a2,Col5a1,Col5a2,Col6a1,Col6a2,Bcar1,Crk,Crkl,Grb2,Grb7,Hras,Kras,Nck1,Nck2,Furin,Pdgfa,Pdgfb,Pdgfra,Pdgfrb,Pik3ca,Pik3r1,Pik3r2,Plat,Plcg1,Ptpn11,Ptpn12,Sos1,Src,Stat3,Stat5a,Stat5b,Stat6,Col5a3,Rasa1,Thbs3,Pdgfc
Signaling by PTK6	2.47678	0.00337728	Lrrk2,Dock1,Arhgap35,Arap1,Sfpq,Stap2,Elmo2,Elmo1,Akt1,Rhoa,Cbl,Ccnd1,Ccne1,Cdk2,Cdk4,Cdkn1b,Socs3,Rps27a,Bcar1,Crk,Dok1,Egfr,Erbb2,Ereg,Khdrbs3,Hbegf,Hif1a,Hras,Kras,Ptpn1,Pxn,Rac1,Khdrbs1,Ptk6,Stat3,Rasa1,Uba52,Ubb
Signaling by Receptor Tyrosine Kinases	3.31341	0.00193023	Frs2,Hnrnpf,Atp6v1f,Atp6v1g2,Shb,Atp6v1g1,Atp6v1c1,Psenen,Polr2e,Ep300,Polr2l,Abi2,Cltc,Polr2b,Rnf41,Dusp6,Polr2g,Ncbp2,Dock1,Brk1,Gtf2f2,Vrk3,Ap2s1,Polr2d,Polr2f,Mapkapk3,Polr2i,Flrt3,Dusp7,Ap2b1,Flrt2,Epgn,Dusp3,Fgfbp3,Nckap1l,Rps6ka5,Ncbp1,Hdac1,Atp6v1d,Ranbp10,Pik3cb,Wwp1,Rapgef1,Elmo2,Elmo1,Chd4,Col6a5,Baiap2,Pik3r4,Cul5,Them4,Atp6v1h,Atp6v0e2,Prr5,Abi1,Esrp1,Cyfip2,Memo1,Hnrnpm,Actb,Actg1,A…
Signaling by ROBO receptors	2.40069	0.00728274	Usp33,Abl1,Rhoa,Rps27a,Cxcr4,Dag1,Enah,Evl,Gpc1,Pfn1,Cxcl12,Slit3,Uba52,Ubb,Vasp
Signaling by TGF-beta Receptor Complex	2.49577	0.00413536	Ube2d3,Smurf2,Snw1,Zfyve9,Cdk8,Bambi,Arhgef18,E2f4,Mtmr4,Ccnt2,Hdac1,Cdk9,Smurf1,Rhoa,Cbl,Ccnt1,Rps27a,E2f5,Fkbp1a,F11r,Smad2,Smad3,Smad4,Smad7,Men1,Nedd8,Furin,Prkcz,Ppm1a,Ccnc,Ube2d1,Rbl1,Skil,Ncor2,Sp1,Strap,Tfdp1,Tgfb1,Tgfbr1,Tgfbr2,Tgif1,Uba52,Ubb,Ube2m,Usp9x,Stub1,Pard6a,Mapk1,Mapk3,Pard3,Rnf111,Trim33,Wwtr1,Tgif2
Signaling by TGFB family members	2.1266	0.00967988	Ube2d3,Smurf2,Snw1,Zfyve9,Cdk8,Bambi,Arhgef18,E2f4,Mtmr4,Acvr1c,Ccnt2,Hdac1,Cdk9,Smurf1,Acvr1b,Acvr2a,Acvr2b,Acvrl1,Rhoa,Bmp2,Bmpr1a,Bmpr2,Amhr2,Cbl,Ccnt1,Rps27a,E2f5,Fkbp1a,Fst,Fstl1,Inhba,Inhbb,F11r,Smad1,Smad2,Smad3,Smad4,Smad5,Smad6,Smad7,Men1,Nedd8,Fstl3,Nog,Furin,Prkcz,Ppm1a,Ccnc,Ube2d1,Rbl1,Skil,Ncor2,Sp1,Strap,Tfdp1,Tgfb1,Tgfbr1,Tgfbr2,Tgif1,Zfyve16,Uba52,Ubb,Ube2m,Usp9x,Stub1,Pard6a,Grem…
Signaling by the B Cell Receptor (BCR)	2.52396	0.00181541	Psmd6,Psmd12,Psmd5,Psmc6,Psmd9,Psmd11,Psmd1,Psme4,Fbxw11,Plcg2,Psmb11,Card11,Rasgrp3,Malt1,Bcl10,Btk,Calm1,Calm2,Calm3,Cd22,Rps27a,Fkbp1a,Grb2,Ptpn6,Hras,Cd79b,Ikbkb,Ikbkg,Itpr1,Itpr2,Itpr3,Kras,Psmb9,Psmb8,Blnk,Lyn,Psmd7,Pik3ap1,Nck1,Nfatc2,Nfkb1,Nfkbia,Nfkbib,Pik3cd,Pik3r1,Ppp3ca,Ppp3cb,Ppp3r1,Psma2,Psma3,Psmb1,Psmb10,Psmb4,Psmb5,Psmb6,Psmb7,Psmc1,Psmc2,Psmc3,Psmc5,Psmd4,Psme1,Psme2,Psme3,Rela,…
Signaling by VEGF	3.06086	0.00181541	Shb,Abi2,Dock1,Brk1,Mapkapk3,Nckap1l,Pik3cb,Elmo2,Elmo1,Baiap2,Them4,Prr5,Abi1,Cyfip2,Actb,Actg1,Akt1,Akt2,Rhoa,Calm1,Calm2,Calm3,Ctnna1,Ctnnb1,Ctnnd1,Cav1,Cdc42,Cdh5,Bcar1,Crk,Cyba,Cybb,Rictor,Wasf2,Ptk2,Flt1,Flt4,Fyn,Hras,Hspb1,Hsp90aa1,Itgav,Itgb3,Jup,Kdr,Kras,Mapkapk2,Ncf1,Ncf2,Nck1,Nck2,Nckap1,Nos3,Nrp1,Nrp2,Pdpk1,Pgf,Pik3ca,Pik3r1,Pik3r2,Prkaca,Prkacb,Prkca,Prkcd,Prkcz,Plcg1,Ptk2b,Pxn,Rac1,…
Signaling by WNT	2.42017	0.00181541	Gng11,Smurf2,Psmd6,Ep300,Psmd12,Psmd5,Ctnnbip1,Psmc6,Psmd9,Cltc,Chd8,Rnf146,Wls,Pygo2,Ap2s1,Psmd11,Psmd1,Psme4,Xpo1,Leo1,Ap2b1,Amer1,Rac3,Rspo3,Tmed5,Hdac1,Cby1,Psmb11,Cltb,Tnks2,Rspo2,Smurf1,Rnf43,Klhl12,Akt1,Akt2,Ap2a1,Ap2a2,Ap2m1,Xiap,Rhoa,Axin1,Axin2,Bcl9,Daam1,Calm1,Calm2,Calm3,Ctnnb1,Cav1,Rps27a,Csnk2a1,Csnk2a2,Csnk2b,Ctbp1,Ctbp2,Dkk1,Dvl1,Dvl2,Dvl3,Lgr5,Frat1,Fzd1,Fzd4,Fzd5,Fzd6,Fzd8,Znrf3…
SIRT1 negatively regulates rRNA expression	3.02486	0.00181541	H4c17,H2aj,H4c8,H2az2,H3f3a,H3f3b,H2ac18,H2ax,H2az1,Suv39h1,H3c2,H4c11,H2ac10,H2bc11,H2bc3,H2bc21,Sirt1,H4c14,H3c1
SMAD2/SMAD3:SMAD4 heterotrimer regulates transcription	1.9137	0.0397613	Cdk8,E2f4,Ccnt2,Cdk9,Ccnt1,Rps27a,E2f5,Smad2,Smad3,Smad4,Smad7,Men1,Ccnc,Rbl1,Sp1,Tfdp1,Uba52,Ubb,Mapk1,Mapk3,Rnf111,Wwtr1
Smooth Muscle Contraction	2.80246	0.00181541	Myl9,Myl12b,Trim72,Itga1,Actg2,Acta2,Calm1,Calm2,Calm3,Itgb5,Myl7,Myl6,Mylpf,Pxn,Myl6b,Sorbs3,Sorbs1,Tln1,Tpm1,Tpm2,Vcl,Tpm3,Myl10,Dysf,Pak2,Lmod1,Tpm4
Sphingolipid metabolism	1.82495	0.0380197	Sptssb,Acer3,Gba2,Acer2,Ormdl3,Ormdl2,Cers4,Samd8,Aldh3b1,Sumf2,Plpp3,Cert1,Prkd2,Degs2,Csnk1g2,Kdsr,Cers5,Sptssa,Sptlc1,Acer1,Sgpp2,Arsg,Sgms2,Glb1l,Prkd3,Osbp,Fa2h,Cers2,Aldh3a2,Neu4,Sgms1,Arsa,Asah1,Cers6,Glb1,Smpd4,Ppm1l,Degs1,Galc,B4galnt1,Gba,Gm2a,Hexa,Hexb,Sgpp1,Neu1,Plpp2,Neu3,Plpp1,Ctsa,Psap,Esyt2,Spns2,Sgpl1,Smpd1,Smpd2,Sptlc2,Asah2,Ugcg,Gltp,Sphk2,Esyt1,Sumf1,Smpd3,Cerk,Ormdl1,Vapa
Spry regulation of FGF signaling	2.71301	0.00229364	Braf,Cbl,Rps27a,Grb2,Mknk1,Ppp2r1a,Ppp2ca,Ppp2cb,Ptpn11,Src,Uba52,Ubb,Spry2,Mapk1,Mapk3
SRP-dependent cotranslational protein targeting to membrane	5.35153	0.00181541	Rpl3l,Rps23,Rps21,Rpl15,Rpl36al,Rpl35,Srp72,Rpl11,Rps10,Rpl14,Rplp2,Rpl37,Rps20,Rpl38,Rpl4,Rps27l,Rpl22l1,Rps13,Rpl39l,Rpl24,Rpl34,Rps15a,Rpl5,Rpl23a,Rpl12,Rpl13,Rps25,Rpl18a,Rps9,Rplp0,Rpl10,Rpl31,Rpsa,Rps2,Rpl18,Rpl19,Rpl22,Rpl26,Rpl27,Rpl28,Rpl29,Rpl37a,Rpl36a,Rpl6,Rpl7,Rpl9,Rps14,Rps15,Rps16,Rps17,Rps18,Rps19,Rps24,Rps29,Rps3a1,Rps4x,Rps5,Rps6,Rps7,Rps8,Srp68,Srp14,Rps28,Rpl13a,Uba52,Rplp1,Sr…
Stabilization of p53	2.33613	0.00687831	Psmd6,Psmd12,Psmd5,Psmc6,Psmd9,Psmd11,Psmd1,Psme4,Psmb11,Atm,Rps27a,Psmb9,Psmb8,Mdm2,Mdm4,Psmd7,Chek2,Psma2,Psma3,Psmb1,Psmb10,Psmb4,Psmb5,Psmb6,Psmb7,Psmc1,Psmc2,Psmc3,Psmc5,Psmd4,Psme1,Psme2,Psme3,Psmd10,Psmd2,Trp53,Psmd3,Uba52,Ubb,Psmc4,Psmd13,Psmd8,Psmd14,Cop1,Psma1,Psma4,Psma5,Psma6,Psma7,Psmb2,Psmb3,Psmf1,Phf20
Switching of origins to a post-replicative state	1.77837	0.0354639	Anapc11,Anapc2,Psmd6,Cdc26,Psmd12,Psmd5,Psmc6,Psmd9,Cdt1,Ube2c,Anapc10,Psmd11,Cdc16,Psmd1,Psme4,Psmb11,Anapc15,Ube2s,Ccne1,Ccne2,Cdk2,Rps27a,Psmb9,Psmb8,Mcm3,Mcm2,Mcm4,Mcm5,Mcm6,Mcm7,Anapc1,Psmd7,Orc3,Orc1,Orc2,Psma2,Psma3,Psmb1,Psmb10,Psmb4,Psmb5,Psmb6,Psmb7,Psmc1,Psmc2,Psmc3,Psmc5,Psmd4,Psme1,Psme2,Psme3,Anapc4,Ube2d1,Cdc23,Anapc16,Psmd10,Cdc27,Skp1,Psmd2,Psmd3,Uba52,Ubb,Ube2e1,Anapc7,Fzr1,Rbx1…
Synthesis of active ubiquitin: roles of E1 and E2 enzymes	2.14247	0.0222184	Ube2w,Ube2g1,Ube2t,Uba6,Ube2r2,Ube2c,Ube2z,Otulin,Ube2q2,Ube2s,Rps27a,Uchl3,Ube2d1,Cdc34,Ube2k,Uba52,Ubb,Ube2e3,Ube2e1,Ube2l3,Uba1,Ube2a,Ube2b,Ube2g2,Ube2h,Usp5,Usp9x,Usp7,Ube2d2a
Synthesis of glycosylphosphatidylinositol (GPI)	-1.76575	0.0311818	Pigl,Pigyl,Pigv,Pigc,Pigm,Pigw,Pigx,Pigg,Pigz,Pigh,Dpm2,Pigq,Piga,Pigf,Pigb,Pigp
Synthesis of very long-chain fatty acyl-CoAs	1.91037	0.0339576	Hacd4,Elovl5,Hacd2,Elovl6,Acsl5,Tecr,Acsl3,Elovl7,Acsl1,Acsl4,Elovl1,Hsd17b12,Hacd3,Acsf3,Hacd1
TCF dependent signaling in response to WNT	1.83295	0.0170235	Smurf2,Psmd6,Ep300,Psmd12,Psmd5,Ctnnbip1,Psmc6,Psmd9,Chd8,Rnf146,Pygo2,Psmd11,Psmd1,Psme4,Xpo1,Leo1,Amer1,Rspo3,Hdac1,Cby1,Psmb11,Tnks2,Rspo2,Rnf43,Klhl12,Akt1,Akt2,Xiap,Axin1,Axin2,Bcl9,Ctnnb1,Cav1,Rps27a,Csnk2a1,Csnk2a2,Csnk2b,Ctbp1,Dkk1,Dvl1,Dvl2,Dvl3,Lgr5,Frat1,Fzd1,Fzd4,Fzd5,Fzd6,Fzd8,Znrf3,Bcl9l,Frat2,Igfals,Kat5,Lef1,Rbbp5,Psmb9,Psmb8,Lrp5,Lrp6,Men1,Psmd7,Usp34,Cdc73,Kremen1,Usp8,Pip5k1b,P…
TCR signaling	2.03781	0.00935579	Psmd6,Ube2v1,Psmd12,Psmd5,Psmc6,Psmd9,Tab2,Psmd11,Psmd1,Psme4,Fbxw11,Plcg2,Cd101,Psmb11,Pik3cb,Card11,Malt1,Bcl10,Cd3e,Cd3g,Cd247,Rps27a,Csk,Ikbkb,Ikbkg,Inpp5d,Itk,Lat,Lck,Lcp2,Psmb9,Psmb8,Grap2,Psmd7,Nck1,Nfkb1,Nfkbia,Pdpk1,Pik3ca,Pik3r1,Pik3r2,Plcg1,Psma2,Psma3,Psmb1,Psmb10,Psmb4,Psmb5,Psmb6,Psmb7,Psmc1,Psmc2,Psmc3,Psmc5,Psmd4,Psme1,Psme2,Psme3,Pten,Ptprc,Ptprj,Ube2d1,Cdc34,Rela,Psmd10,Skp1,Psm…
TGF-beta receptor signaling activates SMADs	2.8867	0.00181541	Smurf2,Zfyve9,Bambi,Mtmr4,Cbl,Rps27a,Fkbp1a,Smad2,Smad3,Smad4,Smad7,Nedd8,Furin,Strap,Tgfb1,Tgfbr1,Tgfbr2,Uba52,Ubb,Ube2m,Stub1
The citric acid (TCA) cycle and respiratory electron transport	4.9614	0.00181541	D2hgdh,Atp5d,Ndufb5,Sdhc,Ndufa3,Ndufa9,Cox7b,Uqcr10,Ndufb9,Ndufb6,Cox20,Ndufc1,Cox14,Ndufa12,Ndufa7,Cyc1,Ndufb3,Uqcrh,Tmem186,Uqcrfs1,Ndufaf3,Etfdh,Ndufb7,Sdhd,Sdha,Uqcrc2,Atp5e,Ndufa6,Ndufa13,Ndufb8,Ndufa10,Cox18,Sdhb,Idh3a,Coq10b,Atp5g2,Cox19,Dmac2l,Ndufb4,Ndufc2,Ndufb2,Ndufa5,Pdhb,Ndufb10,Ndufs3,Ndufa8,Tmem126b,Ndufaf4,Fahd1,Ndufaf5,Ndufaf1,Cox11,Taco1,Ndufab1,Ndufs5,Ndufb11,Dlat,Atp5h,Idh3b,L…
The role of GTSE1 in G2/M progression after G2 checkpoint	2.3596	0.00472971	Psmd6,Psmd12,Psmd5,Psmc6,Psmd9,Tubb6,Psmd11,Psmd1,Psme4,Ccnb1,Tubb2b,Psmb11,Tubal3,Ccnb2,Cdk1,Cdkn1a,Rps27a,Mapre1,Hsp90ab1,Hsp90aa1,Psmb9,Psmb8,Psmd7,Plk1,Psma2,Psma3,Psmb1,Psmb10,Psmb4,Psmb5,Psmb6,Psmb7,Psmc1,Psmc2,Psmc3,Psmc5,Psmd4,Psme1,Psme2,Psme3,Psmd10,Psmd2,Trp53,Psmd3,Tuba1a,Tuba1b,Tuba4a,Tubb3,Uba52,Ubb,Fkbpl,Psmc4,Psmd13,Psmd8,Psmd14,Psma1,Psma4,Psma5,Psma6,Psma7,Psmb2,Psmb3,Gtse1,Tubb…
Thrombin signalling through proteinase activated receptors (PARs)	2.68423	0.0023517	Gng11,Arrb1,F2r,F2rl2,Gna11,Gna12,Gna13,Gna14,Gnaq,Gnb1,Gnb2,Gnb4,Gnb5,Gng10,Gng2,Gng4,Gng5,Gngt2,Arrb2,Src,Mapk1,Mapk3,Gng13
Thromboxane signalling through TP receptor	1.92781	0.0383157	Gng11,Gna11,Gna13,Gna14,Gnaq,Gnb1,Gnb2,Gnb4,Gnb5,Gng10,Gng2,Gng4,Gng5,Gngt2,Tbxa2r,Aamp,Gng13
TNF signaling	1.91943	0.0398363	Tab1,Sppl2a,Bag4,Tab2,Tradd,Rnf31,Otulin,Sppl2b,Sharpin,Cyld,Clip3,Adam17,Birc3,Birc2,Xiap,Casp8,Cflar,Rps27a,Fadd,Rack1,Ikbkb,Ikbkg,Nsmaf,Tax1bp1,Ripk1,Smpd2,Usp2,Tnfaip3,Tnfrsf1a,Traf1,Traf2,Uba52,Ubb,Usp4,Rbck1,Smpd3,Map3k7,Usp21,Madd
TNFR2 non-canonical NF-kB pathway	1.82741	0.0331747	Psmd6,Psmd12,Psmd5,Psmc6,Tnfrsf14,Psmd9,Psmd11,Tnfsf13,Psmd1,Psme4,Fbxw11,Tnfrsf13c,Psmb11,Birc3,Birc2,Rps27a,Psmb9,Psmb8,Lta,Ltb,Ltbr,Psmd7,Nfkb2,Tnfsf14,Tnfrsf11b,Psma2,Psma3,Psmb1,Psmb10,Psmb4,Psmb5,Psmb6,Psmb7,Psmc1,Psmc2,Psmc3,Psmc5,Psmd4,Psme1,Psme2,Psme3,Tnfrsf25,Relb,Psmd10,Map3k14,Skp1,Psmd2,Tnfrsf11a,Tnfrsf17,Tnfrsf18,Tnfrsf1a,Tnfrsf1b,Tnfsf9,Traf2,Traf3,Psmd3,Tnfsf4,Uba52,Ubb,Ube2m,Uba…
Toll Like Receptor 10 (TLR10) Cascade	2.07958	0.015	Tab1,Ube2v1,Peli1,Tnip2,Dusp6,Tab2,Vrk3,Nkiras1,Mapkapk3,Fbxw11,Dusp7,Nkiras2,Dusp3,Rps6ka5,Nod1,Irak2,App,Atf1,Atf2,Rps27a,Creb1,Fos,Hmgb1,Ikbkb,Ikbkg,Irak1,Jun,Mapkapk2,Nfkb1,Nfkb2,Nfkbia,Nfkbib,Ppp2r1a,Ppp2ca,Ppp2cb,Rela,S100b,Skp1,Traf6,Uba52,Ubb,Mapk7,Dusp4,Map2k3,Map2k4,Map2k6,Map2k7,Map3k7,Map3k8,Mapk1,Mapk10,Mapk14,Mapk3,Mapk8,Mapk9,Ecsit,Cul1,Ube2n,Peli2,Ripk2
Toll Like Receptor 2 (TLR2) Cascade	2.03884	0.0159382	Tab1,Ube2v1,Peli1,Tnip2,Dusp6,Tab2,Vrk3,Nkiras1,Mapkapk3,Fbxw11,Dusp7,Nkiras2,Dusp3,Rps6ka5,Nod1,Irak2,App,Atf1,Atf2,Rps27a,Creb1,Fos,Hmgb1,Ikbkb,Ikbkg,Irak1,Jun,Mapkapk2,Nfkb1,Nfkb2,Nfkbia,Nfkbib,Tirap,Ppp2r1a,Ppp2ca,Ppp2cb,Rela,S100b,Skp1,Traf6,Uba52,Ubb,Mapk7,Dusp4,Map2k3,Map2k4,Map2k6,Map2k7,Map3k7,Map3k8,Mapk1,Mapk10,Mapk14,Mapk3,Mapk8,Mapk9,Ecsit,Cul1,Ube2n,Peli2,Ripk2
Toll Like Receptor 3 (TLR3) Cascade	2.21696	0.0094283	Tab1,Ube2v1,Tnip2,Dusp6,Tab2,Vrk3,Nkiras1,Mapkapk3,Fbxw11,Dusp7,Nkiras2,Dusp3,Rps6ka5,Nod1,Irak2,App,Atf1,Atf2,Rps27a,Creb1,Fos,Hmgb1,Ikbkb,Ikbkg,Irak1,Jun,Mapkapk2,Nfkb1,Nfkb2,Nfkbia,Nfkbib,Ppp2r1a,Ppp2ca,Ppp2cb,Rela,S100b,Irf7,Irf3,Skp1,Traf6,Uba52,Ubb,Mapk7,Dusp4,Map2k3,Map2k4,Map2k6,Map2k7,Map3k7,Map3k8,Mapk1,Mapk10,Mapk14,Mapk3,Mapk8,Mapk9,Cul1,Ube2n,Ripk2
Toll Like Receptor 4 (TLR4) Cascade	1.89907	0.0197277	Ube2d3,Tab1,Ube2v1,Peli1,Tnip2,Bpi,Dusp6,Tab2,Vrk3,Nkiras1,Mapkapk3,Fbxw11,Plcg2,Dusp7,Nkiras2,Dusp3,Rps6ka5,Ticam1,Nod1,Irak2,Birc3,Birc2,App,Atf1,Atf2,Casp8,Cd14,Rps27a,Creb1,Dnm1,Dnm2,Fadd,Fos,Hmgb1,Ikbkb,Ikbkg,Irak1,Itgb2,Jun,Lbp,Ly86,Ly96,Mapkapk2,Nfkb1,Nfkb2,Nfkbia,Nfkbib,Tirap,Ppp2r1a,Ppp2ca,Ppp2cb,Ptpn11,Ube2d1,Rela,Ripk1,S100b,Sftpd,Tank,Irf7,Irf3,Skp1,Tlr4,Traf3,Traf6,Uba52,Ubb,Tbk1,Ikb…
Toll Like Receptor 5 (TLR5) Cascade	2.07958	0.015	Tab1,Ube2v1,Peli1,Tnip2,Dusp6,Tab2,Vrk3,Nkiras1,Mapkapk3,Fbxw11,Dusp7,Nkiras2,Dusp3,Rps6ka5,Nod1,Irak2,App,Atf1,Atf2,Rps27a,Creb1,Fos,Hmgb1,Ikbkb,Ikbkg,Irak1,Jun,Mapkapk2,Nfkb1,Nfkb2,Nfkbia,Nfkbib,Ppp2r1a,Ppp2ca,Ppp2cb,Rela,S100b,Skp1,Traf6,Uba52,Ubb,Mapk7,Dusp4,Map2k3,Map2k4,Map2k6,Map2k7,Map3k7,Map3k8,Mapk1,Mapk10,Mapk14,Mapk3,Mapk8,Mapk9,Ecsit,Cul1,Ube2n,Peli2,Ripk2
Toll Like Receptor 7/8 (TLR7/8) Cascade	2.00982	0.0156239	Tab1,Ube2v1,Peli1,Tnip2,Dusp6,Tab2,Vrk3,Nkiras1,Mapkapk3,Fbxw11,Dusp7,Nkiras2,Dusp3,Rps6ka5,Ticam1,Nod1,Irak2,App,Atf1,Atf2,Cd14,Rps27a,Creb1,Fos,Hmgb1,Ikbkb,Ikbkg,Irak1,Jun,Ly96,Mapkapk2,Nfkb1,Nfkb2,Nfkbia,Nfkbib,Ppp2r1a,Ppp2ca,Ppp2cb,Rela,S100b,Irf7,Skp1,Tlr4,Traf6,Uba52,Ubb,Mapk7,Dusp4,Map2k3,Map2k4,Map2k6,Map2k7,Map3k7,Map3k8,Mapk1,Mapk10,Mapk14,Mapk3,Mapk8,Mapk9,Ecsit,Cul1,Ube2n,Peli2,Ripk2
Toll Like Receptor 9 (TLR9) Cascade	1.88524	0.0293273	Tab1,Ube2v1,Peli1,Tnip2,Dusp6,Tab2,Vrk3,Nkiras1,Mapkapk3,Fbxw11,Dusp7,Nkiras2,Dusp3,Rps6ka5,Ticam1,Nod1,Pik3r4,Irak2,App,Atf1,Atf2,Cd14,Rbsn,Rps27a,Creb1,Fos,Hmgb1,Ikbkb,Ikbkg,Irak1,Tlr9,Jun,Ly96,Mapkapk2,Nfkb1,Nfkb2,Nfkbia,Nfkbib,Ppp2r1a,Ppp2ca,Ppp2cb,Eea1,Rela,S100b,Irf7,Skp1,Tlr4,Traf6,Uba52,Ubb,Mapk7,Dusp4,Map2k3,Map2k4,Map2k6,Map2k7,Map3k7,Map3k8,Mapk1,Mapk10,Mapk14,Mapk3,Mapk8,Mapk9,Ecsit,C…
Toll Like Receptor TLR1:TLR2 Cascade	2.03884	0.0159382	Tab1,Ube2v1,Peli1,Tnip2,Dusp6,Tab2,Vrk3,Nkiras1,Mapkapk3,Fbxw11,Dusp7,Nkiras2,Dusp3,Rps6ka5,Nod1,Irak2,App,Atf1,Atf2,Rps27a,Creb1,Fos,Hmgb1,Ikbkb,Ikbkg,Irak1,Jun,Mapkapk2,Nfkb1,Nfkb2,Nfkbia,Nfkbib,Tirap,Ppp2r1a,Ppp2ca,Ppp2cb,Rela,S100b,Skp1,Traf6,Uba52,Ubb,Mapk7,Dusp4,Map2k3,Map2k4,Map2k6,Map2k7,Map3k7,Map3k8,Mapk1,Mapk10,Mapk14,Mapk3,Mapk8,Mapk9,Ecsit,Cul1,Ube2n,Peli2,Ripk2
Toll Like Receptor TLR6:TLR2 Cascade	2.03884	0.0159382	Tab1,Ube2v1,Peli1,Tnip2,Dusp6,Tab2,Vrk3,Nkiras1,Mapkapk3,Fbxw11,Dusp7,Nkiras2,Dusp3,Rps6ka5,Nod1,Irak2,App,Atf1,Atf2,Rps27a,Creb1,Fos,Hmgb1,Ikbkb,Ikbkg,Irak1,Jun,Mapkapk2,Nfkb1,Nfkb2,Nfkbia,Nfkbib,Tirap,Ppp2r1a,Ppp2ca,Ppp2cb,Rela,S100b,Skp1,Traf6,Uba52,Ubb,Mapk7,Dusp4,Map2k3,Map2k4,Map2k6,Map2k7,Map3k7,Map3k8,Mapk1,Mapk10,Mapk14,Mapk3,Mapk8,Mapk9,Ecsit,Cul1,Ube2n,Peli2,Ripk2
Toll-like Receptor Cascades	2.08963	0.0059586	Ube2d3,Tab1,Ube2v1,Peli1,Tnip2,Bpi,Dusp6,Tab2,Vrk3,Gsdmd,Nkiras1,Mapkapk3,Fbxw11,Plcg2,Dusp7,Nkiras2,Cnpy3,Dusp3,Rps6ka5,Ticam1,Apob,Nod1,Pik3r4,Irak2,Birc3,Birc2,App,Atf1,Atf2,Casp8,Cd14,Cd36,Rbsn,Rps27a,Creb1,Ctsb,Ctsk,Ctsl,Ctss,Dnm1,Dnm2,Fadd,Fos,Hmgb1,Ikbkb,Ikbkg,Irak1,Tlr9,Itgb2,Jun,Lbp,Ly86,Ly96,Mapkapk2,Nfkb1,Nfkb2,Nfkbia,Nfkbib,Tirap,Ppp2r1a,Ppp2ca,Ppp2cb,Lgmn,Ptpn11,Ube2d1,Eea1,Rela,Ripk…
TP53 Regulates Metabolic Genes	3.19062	0.00181541	Lamtor4,Cox7b,Cox20,Cox14,Lamtor1,Sesn2,Cox18,Cox19,Rraga,Lamtor5,Cox11,Taco1,Slc38a9,Lrpprc,Prkaa1,Ddit4,Sesn1,Prkaa2,Prkag2,Sesn3,Akt1,Akt2,Cox6b1,Cox4i1,Cox5a,Cox6a1,Cox7c,Cox8a,Cycs,G6pdx,Gls,Gpi1,Gpx2,Gsr,Txnrd1,Lamtor2,Ndufa4,Prdx1,Prkab1,Rragd,Rheb,Sco1,Cox7a2l,Surf1,Rragc,Ywhab,Prdx2,Prdx5,Sco2,Txn1,Ywhae,Ywhag,Ywhah,Ywhaq,Ywhaz,Sfn,Akt3,Lamtor3,Mlst8,Mtor,Tigar,Tsc1
TP53 regulates transcription of additional cell cycle genes whose exact role in the p53 pathway remain uncertain	1.89755	0.0398363	Cnot6l,Cnot3,Cnot8,Cnot1,Cnot6,Cnot2,Btg2,Cdc25c,Cnot10,Npm1,Cnot7,Cnot11,Plk2,Cnot4,Cenpj,Cnot9,Tnks1bp1
TP53 Regulates Transcription of DNA Repair Genes	1.84044	0.0494404	Polr2e,Gtf2h5,Polr2l,Ccnh,Polr2b,Ctdp1,Elob,Polr2g,Eloc,Gtf2f2,Cdk12,Polr2d,Cdk13,Polr2f,Polr2i,Ccnt2,Cdk9,Ccnt1,Cdk7,Gtf2h3,Ell,Ercc2,Ercc3,Gtf2h1,Supt16,Polr2h,Mnat1,Polr2k,Polr2a,Polr2c,Ssrp1,Supt4a,Supt5,Tcea1,Gtf2h2,Nelfa,Nelfcd,Nelfb,Eloa,Nelfe,Gtf2f1
TRAF6 mediated induction of NFkB and MAP kinases upon TLR7/8 or 9 activation	1.96398	0.0223302	Tab1,Ube2v1,Peli1,Tnip2,Dusp6,Tab2,Vrk3,Nkiras1,Mapkapk3,Fbxw11,Dusp7,Nkiras2,Dusp3,Rps6ka5,Ticam1,Nod1,Irak2,App,Atf1,Atf2,Cd14,Rps27a,Creb1,Fos,Hmgb1,Ikbkb,Ikbkg,Irak1,Jun,Ly96,Mapkapk2,Nfkb1,Nfkb2,Nfkbia,Nfkbib,Ppp2r1a,Ppp2ca,Ppp2cb,Rela,S100b,Skp1,Tlr4,Traf6,Uba52,Ubb,Mapk7,Dusp4,Map2k3,Map2k4,Map2k6,Map2k7,Map3k7,Map3k8,Mapk1,Mapk10,Mapk14,Mapk3,Mapk8,Mapk9,Ecsit,Cul1,Ube2n,Peli2,Ripk2
trans-Golgi Network Vesicle Budding	3.43205	0.00181541	Snx9,Cltc,Ap4b1,Necap1,Gak,Snx2,Chmp2a,Bloc1s3,Snx5,Picalm,Acbd3,Txndc5,Cltb,Gbf1,Ap4e1,Ap1s2,Napa,Gns,Arrb1,Ap1b1,Ap1g1,Ap1g2,Ap1m1,Ap1m2,Ap1s1,Ap3b1,Ap3s1,Ap4m1,Ap4s1,App,Arf1,Yipf6,Cpd,Dnase2a,Dnm2,Fth1,Bloc1s1,Hgs,Pum1,Hspa8,Igf2r,Tbc1d8b,M6pr,Bloc1s6,Pik3c2a,Bloc1s4,Rab5c,Sh3gl2,Snapin,Snap23,Sort1,Stx4a,Tpd52,Tfrc,Tgoln1,Vamp2,Vamp8,Ap1s3,Ocrl,Sh3d19,Golgb1,Dtnbp1,Hip1r,Ctsz
Transcriptional activity of SMAD2/SMAD3:SMAD4 heterotrimer	2.10775	0.0220303	Ube2d3,Smurf2,Snw1,Cdk8,E2f4,Ccnt2,Hdac1,Cdk9,Ccnt1,Rps27a,E2f5,Smad2,Smad3,Smad4,Smad7,Men1,Ppm1a,Ccnc,Ube2d1,Rbl1,Skil,Ncor2,Sp1,Tfdp1,Tgif1,Uba52,Ubb,Usp9x,Mapk1,Mapk3,Rnf111,Trim33,Wwtr1,Tgif2
Transcriptional regulation by RUNX1	2.7561	0.00181541	Dpy30,Psmd6,Ep300,Ccnh,Smarcd3,Psmd12,Psmd5,Yaf2,Psmc6,Prmt6,Psmd9,Smarca2,H4c17,Smarcc2,H2aj,Psmd11,Kmt2e,Elf2,H4c8,Setd1a,Psmd1,Psme4,Hdac1,Psmb11,Wdr5,Kmt2b,Pcgf5,Arid1b,Abl1,Setd1b,Arid2,Serpinb13,H2az2,Bmi1,Cbfb,Cbx4,Ccnd1,Ccnd2,Ccnd3,Phc3,Cdk6,Cdk7,Rps27a,Csnk2a1,Csnk2a2,Csnk2b,Ctsk,Ctsl,Phc1,Elf1,Gata3,H3f3a,H3f3b,Hipk2,H2ac18,H2ax,Prmt1,Itch,Ldb1,Rbbp5,Lmo2,Psmb9,Psmb8,Mnat1,Psmd7,Smarcd1…
Transcriptional regulation by RUNX2	2.64545	0.00413536	Psmd6,Psmd12,Psmd5,Psmc6,Psmd9,Psmd11,Psmd1,Ccnb1,Runx2,Cbfb,Ccnd1,Cdk1,Cdk4,Rps27a,Psmb9,Psmb8,Smad1,Smad4,Psmd7,Psma2,Psma3,Psmb1,Psmb10,Psmb4,Psmb5,Psmb6,Psmb7,Psmc1,Psmc2,Psmc3,Psmc5,Psmd4,Psme1,Psme2,Psme3,Psmd10,Sox9,Ppm1d,Skp1,Psmd2,Psmd3,Uba52,Ubb,Stub1,Rbx1,Psmc4,Psmd13,Psmd8,Psmd14,Psma1,Psma4,Psma5,Psma6,Psma7,Psmb2,Psmb3,Cul1,Skp2,Psmf1
Transcriptional regulation by RUNX3	2.56463	0.00181541	Smurf2,Snw1,Psmd6,Ep300,Psmd12,Psmd5,Psmc6,Psmd9,Psmd11,Psmd1,Maml1,Maml3,Maml2,Smurf1,Hdac4,Ctnnb1,Cbfb,Ccnd1,Rps27a,Brd2,Kat2a,Kras,Lef1,Psmb9,Psmb8,Smad3,Smad4,Mdm2,Psmd7,Notch1,Kat2b,Psma2,Psma3,Psmb1,Psmb10,Psmb4,Psmb5,Psmb6,Psmb7,Psmc1,Psmc2,Psmc3,Psmc5,Psmd4,Psme1,Psme2,Psme3,Rbpj,Psmd10,Src,Tcf7,Tcf7l2,Tead2,Tead3,Psmd2,Tgfb1,Trp53,Psmd3,Uba52,Ubb,Yap1,Psmc4,Psmd13,Psmd8,Psmd14,Psma1,Psma…
Transcriptional Regulation by TP53	2.21393	0.00185408	Dna2,Gatad2b,Lamtor4,Cox7b,Ing5,Cox20,Cox14,Polr2e,Ep300,Taf12,Gtf2h5,Polr2l,Prelid1,Lamtor1,Ccnh,Sesn2,Taf13,Rffl,Polr2b,Cox18,Cnot6l,Ctdp1,Elob,Polr2g,Eloc,Kmt5a,Cox19,Rpa3,Rpa1,Steap3,Rraga,Lamtor5,Gtf2f2,Tmem219,Taf11,Cnot3,Triap1,Cnot8,Cdk12,Dyrk2,Polr2d,Ing2,Rfc3,Cdk13,Cox11,Polr2f,Polr2i,Meaf6,Taco1,Taf15,Gatad2a,Cnot1,Ppp1r13l,Topbp1,Atrip,Cnot6,Cnot2,Ccnb1,Slc38a9,Tpx2,Rfc5,Brpf3,Lrpprc,…
Transferrin endocytosis and recycling	2.70337	0.00181541	Atp6v1f,Atp6v1g2,Atp6v1g1,Atp6v1c1,Steap3,Atp6v1d,Steap2,Atp6v1h,Atp6v0e2,Atp6v1a,Atp6v1b2,Atp6v0d1,Atp6v1e1,Atp6v0e,Atp6v0a1,Atp6v0c,Hfe,Atp6v0b,Atp6ap1,Atp6v0a2,Trf,Tfrc,Tcirg1,Mcoln1
[truncated: 1,582 more rows]

## Sheet: P+A vs. P
PROBIOTICS + AMYLASE vs. PROBIOTICS
Pathway description	Normalized enrichment score	Adjusted P Value	Targets
[truncated: 793 more rows]

## Sheet: P+A vs. A
PROBIOTICS + AMYLASE vs. AMYLASE
[truncated: 794 more rows]

[truncated: 3 more sheets: A VS. C, P VS. C, P vs. A]
